# Supplementary material for: Will the chemical probes please stand up?
Source: RSC Med Chem. 2021 Jul 16;12(8):1428–41. doi: 10.1039/d1md00138h (PMC8372204; doi:10.1039/d1md00138h)
Supplement: MD-012-D1MD00138H-s001 [file MD-012-D1MD00138H-s001.xlsx]

## Sheet: PROBES
pdid	compound_name	smiles	inchikey	target	organism	Bromodomains chemical toolbox	Chemical Probes.org	Gray Laboratory Probes	High-quality chemical probes	MLP Probes	Nature Chemical Biology Probes	Open Science Probes	opnMe Portal	Probe Miner (suitable probes)	Protein methyltransferases chemical toolbox	SGC Probes	Tool Compound Set	Concise Guide to Pharmacology 2019/20	Kinase Chemogenomic Set (KCGS)	Kinase Inhibitors (best-in-class)	Novartis Chemogenetic Library (NIBR MoA Box)	Nuisance compounds in cellular assays	experimental probe	calculated probe	approved drug	P&D approved	PROTAC	covalent binder	biased GPCR ligand	inorganic	structural alert	no. targets	mw	hba	hbd	rb	rc	arc	logp	tpsa	noniso_pdid	stereoisomer
PD000001	BAZ2-ICR	Cn1cc(CCn2cnc(-c3cnn(C)c3)c2-c2ccc(C#N)cc2)cn1	RRZVGDGTWNQAPW-UHFFFAOYSA-N	BAZ2A;BAZ2B	Homo sapiens	1	1		1							1	1				1		1	1								3.0	357.17	7.0	0.0	5.0	4.0	4.0	2.8	77.25	PD000001	-
PD000002	I-BRD9	CCn1cc(-c2cccc(C(F)(F)F)c2)c2sc(C(=N)NC3CCS(=O)(=O)CC3)cc2c1=O	WRUWGLUCNBMGPS-UHFFFAOYSA-N	BRD9	Homo sapiens	1	1		1							1	1				1		1	1		1						3.0	497.11	6.0	2.0	4.0	4.0	3.0	4.26	92.02	PD000002	-
PD000003	UNC0638	COc1cc2c(NC3CCN(C(C)C)CC3)nc(C3CCCCC3)nc2cc1OCCCN1CCCC1	QOECJCJVIMVJGX-UHFFFAOYSA-N	EHMT2;EHMT1;EHMT1,EHMT2	Homo sapiens		1		1		1					1	1				1		1	1		1						5.0	509.37	7.0	1.0	10.0	5.0	2.0	5.84	62.75	PD000003	-
PD000004	LP99	Cc1cc(=O)n(C)c2cc(N3C(=O)CC[C@H](NS(=O)(=O)CC(C)C)[C@H]3c3ccc(Cl)cc3)ccc12	LVDRREOUMKACNJ-BKMJKUGQSA-N	BRD7;BRD9	Homo sapiens	1	1		1							1	1				1		1	1								2.0	515.16	5.0	1.0	6.0	4.0	3.0	4.31	88.48	PD007091	-
PD000005	UNC1215	O=C(c1ccc(C(=O)N2CCC(N3CCCC3)CC2)c(Nc2ccccc2)c1)N1CCC(N2CCCC2)CC1	PQOOIERVZAXHBP-UHFFFAOYSA-N	L3MBTL3	Homo sapiens		1		1		1					1	1	1			1		1	1								5.0	529.34	5.0	1.0	6.0	6.0	2.0	4.83	59.13	PD000005	-
PD000007	IOX1	O=C(O)c1ccc(O)c2ncccc12	JGRPKOGHYBAVMW-UHFFFAOYSA-N	KDM4D;KDM6A;KDM4A;KDM4C;KDM4E;KDM3A;KDM6B	Homo sapiens				1							1					1		1									11.0	189.04	3.0	2.0	1.0	2.0	2.0	1.64	70.42	PD000007	-
PD000008	IOX2	O=C(O)CNC(=O)c1c(O)c2ccccc2n(Cc2ccccc2)c1=O	CAOSCCRYLYQBES-UHFFFAOYSA-N	EGLN1	Homo sapiens				1							1					1		1									4.0	352.11	5.0	3.0	5.0	3.0	3.0	1.57	108.63	PD000008	-
PD000009	I-CBP112	CCC(=O)N1CCOc2c(cc(-c3ccc(OC)c(OC)c3)cc2OC[C@H]2CCCN(C)C2)C1	YKNAKDFZAWQEEO-IBGZPJMESA-N	CREBBP;EP300;CREBBP,EP300	Homo sapiens	1	1		1							1	1	1			1		1	1		1						4.0	468.26	6.0	0.0	7.0	4.0	2.0	4.22	60.47	PD007013	-
PD000010	BAY-598	CCN(C(=O)CO)[C@H]1CN(/C(=N\C#N)Nc2cccc(OC(F)F)c2)N=C1c1ccc(Cl)c(Cl)c1	OTTJIRVZJJGFTK-SFHVURJKSA-N	SMYD2	Homo sapiens		1		1						1	1	1				1		1	1		1						2.0	524.09	6.0	2.0	7.0	3.0	2.0	3.77	113.55	PD007005	-
PD000011	OICR-9429	CN1CCN(c2ccc(-c3cccc(CN4CCOCC4)c3)cc2NC(=O)c2c[nH]c(=O)cc2C(F)(F)F)CC1	DJOVLOYCGXNVPI-UHFFFAOYSA-N	WDR5	Homo sapiens		1		1		1				1	1	1				1		1	1								1.0	555.25	6.0	2.0	6.0	5.0	3.0	3.9	80.91	PD000011	-
PD000013	PFI-1	COc1ccccc1S(=O)(=O)Nc1ccc2c(c1)CN(C)C(=O)N2	TXZPMHLMPKIUGK-UHFFFAOYSA-N	BRDT;BRD2;BRD3;BRD4	Homo sapiens	1	1		1							1	1				1		1	1		1						2.0	347.09	4.0	2.0	4.0	3.0	2.0	2.47	87.74	PD000013	-
PD000014	OF-1	COc1cc2c(cc1NS(=O)(=O)c1ccc(Br)cc1C)n(C)c(=O)n2C	YUNQZQREIHWDQT-UHFFFAOYSA-N	BRPF1;BRD1;BRPF3	Homo sapiens	1			1							1					1		1									3.0	439.02	6.0	1.0	4.0	3.0	3.0	2.76	82.33	PD000014	-
PD000015	PFI-3	O=C(/C=C/N1C[C@H]2C[C@@H]1CN2c1ccccn1)c1ccccc1O	INAICWLVUAKEPB-QSTFCLMHSA-N	SMARCA2;SMARCA4;PBRM1	Homo sapiens	1	1		1							1		1			1		1									2.0	321.15	5.0	1.0	4.0	4.0	2.0	2.45	56.67	PD065673	-
PD000017	PFI-4	COc1ccccc1C(=O)Nc1cc2c(cc1N1CCCC1)n(C)c(=O)n2C	QCIJLRJBZDBVDB-UHFFFAOYSA-N	BRPF1	Homo sapiens	1			1							1					1		1			1						5.0	380.18	6.0	1.0	4.0	4.0	3.0	2.74	68.5	PD000017	-
PD000018	UNC0642	COc1cc2c(NC3CCN(C(C)C)CC3)nc(N3CCC(F)(F)CC3)nc2cc1OCCCN1CCCC1	RNAMYOYQYRYFQY-UHFFFAOYSA-N	EZH2;EHMT1,EHMT2;EHMT2;EHMT1	Homo sapiens		1		1						1	1	1				1		1	1		1						4.0	546.35	8.0	1.0	10.0	5.0	2.0	5.02	65.99	PD000018	-
PD000019	UNC1999	CCCc1cc(C)[nH]c(=O)c1CNC(=O)c1cc(-c2ccc(N3CCN(C(C)C)CC3)nc2)cc2c1cnn2C(C)C	DPJNKUOXBZSZAI-UHFFFAOYSA-N	EZH1;EZH2	Homo sapiens		1		1						1	1	1				1		1	1		1						2.0	569.35	7.0	2.0	9.0	5.0	4.0	5.09	99.15	PD000019	-
PD000021	GSK864	COc1c(C)cc(NC(=O)c2nn(Cc3ccc(F)cc3)c3c2CN(C(=O)c2ccc[nH]2)C[C@]3(C)C(N)=O)cc1C	DUCNNEYLFOQFSW-PMERELPUSA-N	IDH1	Homo sapiens		1		1							1	1						1	1								0.0	558.24	6.0	3.0	7.0	5.0	4.0	3.68	135.34	PD006392	-
PD000022	bromosporine	CCOC(=O)Nc1cc(-c2ccc(C)c(NS(C)(=O)=O)c2)nn2c(C)nnc12	UYBRROMMFMPJAN-UHFFFAOYSA-N	BRDT;BRD2;BRD3;BRD4;CECR2	Homo sapiens											1							1								1	5.0	404.13	8.0	2.0	5.0	3.0	3.0	2.35	127.58	PD000022	-
PD000024	BI-9564	COc1cc(-c2cn(C)c(=O)c3cnccc23)c(OC)cc1CN(C)C	BJFSUDWKXGMUKA-UHFFFAOYSA-N	BRD7;BRD9	Homo sapiens	1	1		1				1			1	1				1		1	1		1						7.0	353.17	6.0	0.0	5.0	3.0	3.0	2.68	56.59	PD000024	-
PD000026	GTPL8955	CC(C)Oc1ccc(-c2c[nH]cc2CN(C)CCN)cc1	FMTVWAGUJRUAKE-UHFFFAOYSA-N	PRMT5;PRMT8;CARM1;PRMT1;PRMT3;PRMT6	Homo sapiens		1		1						1	1	1				1		1	1								5.0	287.2	3.0	2.0	7.0	2.0	2.0	2.86	54.28	PD000026	-
PD000028	NI-57	COc1cc(C#N)ccc1S(=O)(=O)Nc1ccc2c(c1)cc(C)c(=O)n2C	UEMQPCYDWCSVCU-UHFFFAOYSA-N	BRD1;BRPF3;BRPF1	Homo sapiens	1	1		1							1					1		1									7.0	383.09	6.0	1.0	4.0	3.0	3.0	2.53	101.19	PD000028	-
PD000029	NVS-CECR2-1	CCCS(=O)(=O)c1nc(NC2CC2)cc(-c2ccc3c(ccn3C3CC(C)(C)NC(C)(C)C3)c2)n1	XVECNLUKQDKOST-UHFFFAOYSA-N	CECR2	Homo sapiens	1			1							1					1		1									1.0	495.27	7.0	2.0	7.0	5.0	3.0	5.34	88.91	PD000029	-
PD000030	SGC707	O=C(NCC(=O)N1CCCC1)Nc1ccc2cnccc2c1	DMIDPTCQPIJYFE-UHFFFAOYSA-N	PRMT3	Homo sapiens		1		1					1	1	1	1				1		1	1								1.0	298.14	3.0	2.0	3.0	3.0	2.0	1.98	74.33	PD000030	-
PD000031	(+)-JQ-1	Cc1sc2c(c1C)C(c1ccc(Cl)cc1)=N[C@@H](CC(=O)OC(C)(C)C)c1nnc(C)n1-2	DNVXATUJJDPFDM-KRWDZBQOSA-N	BRD2;BRD3;BRD4;BRDT	Homo sapiens	1	1		1							1	1				1		1	1		1						5.0	456.14	7.0	0.0	3.0	4.0	3.0	5.53	69.37	PD039968	-
PD000032	GSK343	CCCc1cc(C)[nH]c(=O)c1CNC(=O)c1cc(-c2ccnc(N3CCN(C)CC3)c2)cc2c1cnn2C(C)C	ULNXAWLQFZMIHX-UHFFFAOYSA-N	EZH2	Homo sapiens		1		1						1	1	1				1		1	1		1						6.0	541.32	7.0	2.0	8.0	5.0	4.0	4.31	99.15	PD000032	-
PD000033	A-366	COc1cc2c(cc1OCCCN1CCCC1)N=C(N)C21CCC1	BKCDJTRMYWSXMC-UHFFFAOYSA-N	EHMT1,EHMT2;EHMT2;EHMT1	Homo sapiens		1		1						1	1	1				1		1	1		1						3.0	329.21	5.0	1.0	6.0	4.0	1.0	2.98	60.08	PD000033	-
PD000034	A-196	Clc1cc2c(NC3CCCC3)nnc(-c3ccncc3)c2cc1Cl	ABGOSOMRWSYAOB-UHFFFAOYSA-N	KMT5B;KMT5C	Homo sapiens		1		1						1	1					1		1									2.0	358.08	4.0	1.0	3.0	4.0	3.0	5.35	50.7	PD000034	-
PD000035	MS049	CNCCN1CCC(OCc2ccccc2)CC1	HBOJWAYLSJLULG-UHFFFAOYSA-N	CARM1;PRMT6	Homo sapiens				1						1	1					1		1									5.0	248.19	3.0	1.0	6.0	2.0	1.0	1.89	24.5	PD000035	-
PD000036	GSK2801	CCCOc1ccn2c(C(C)=O)cc(-c3ccccc3S(C)(=O)=O)c2c1	KHWCPNJRJCNVRI-UHFFFAOYSA-N	BAZ2A;BAZ2B	Homo sapiens	1	1		1							1	1	1			1		1	1								6.0	371.12	5.0	0.0	6.0	3.0	3.0	4.0	64.85	PD000036	-
PD000037	LLY-507	Cc1cn(CCN2CCN(c3ccccc3-c3cc(C#N)cc(C(=O)NCCCN4CCCC4)c3)CC2)c2ccccc12	PNYRDVBFYVDJJI-UHFFFAOYSA-N	SMYD2	Homo sapiens		1		1							1	1				1		1	1								1.0	574.34	6.0	1.0	10.0	6.0	4.0	5.53	67.54	PD000037	-
PD000038	GSK591	O=C(NC[C@H](O)CN1CCc2ccccc2C1)c1ccnc(NC2CCC2)c1	TWKYXZSXXXKKJU-FQEVSTJZSA-N	PRMT5	Homo sapiens		1		1						1	1	1				1		1	1								1.0	380.22	5.0	3.0	7.0	4.0	2.0	2.19	77.49	PD004136	-
PD000047	PODOFILOX	COc1cc([C@@H]2c3cc4c(cc3[C@H](O)[C@H]3COC(=O)[C@H]23)OCO4)cc(OC)c1OC	YJGVMLPVUAXIQN-XVVDYKMHSA-N	NR3C1	Homo sapiens									1							1	1		1	1						1	18.0	414.13	8.0	1.0	4.0	5.0	2.0	2.41	92.68	PD055368	-
PD000061	GLYBURIDE	COc1ccc(Cl)cc1C(=O)NCCc1ccc(S(=O)(=O)NC(=O)NC2CCCCC2)cc1	ZNNLBTZKUZBEKO-UHFFFAOYSA-N	ABCC8;KCNJ11;ABCC8,KCNJ11	Homo sapiens		1		1									1			1		1		1	1						40.0	493.14	5.0	3.0	8.0	3.0	2.0	3.64	113.6	PD000061	-
PD000166	PHENOTHIAZINE	c1ccc2c(c1)Nc1ccccc1S2	WJFKNYWRSNBZNX-UHFFFAOYSA-N	CYP1A2	Homo sapiens									1										1		1						24.0	199.05	2.0	1.0	0.0	3.0	2.0	3.89	12.03	PD000166	-
PD000219	REPAGLINIDE	CCOc1cc(CC(=O)N[C@@H](CC(C)C)c2ccccc2N2CCCCC2)ccc1C(=O)O	FAEKWTJYAYMJKF-QHCPKHFHSA-N	KCNJ11;ABCC8,KCNJ11;ABCC8	Homo sapiens		1		1								1	1			1		1	1	1							13.0	452.27	4.0	2.0	10.0	3.0	2.0	5.22	78.87	PD055359	-
PD000253	BENZBROMARONE	CCc1oc2ccccc2c1C(=O)c1cc(Br)c(O)c(Br)c1	WHQCHUCQKNIQEC-UHFFFAOYSA-N		-					1													1		1							48.0	421.92	3.0	1.0	3.0	3.0	3.0	5.46	50.44	PD000253	-
PD000288	SPERMINE	NCCCNCCCCNCCCN	PFNFFQXMRSDOHW-UHFFFAOYSA-N	CA4	Homo sapiens									1				1						1					1			32.0	202.22	4.0	4.0	11.0	0.0	0.0	-0.36	76.1	PD000288	-
PD000475	CITALOPRAM	CN(C)CCCC1(c2ccc(F)cc2)OCc2cc(C#N)ccc21	WSEQXVZVJXJVFP-UHFFFAOYSA-N	SLC6A4	Homo sapiens				1					1				1			1			1	1	1						22.0	324.16	3.0	0.0	5.0	3.0	2.0	3.81	36.26	PD000475	-
PD000593	HINOKITIOL	CC(C)c1cccc(=O)c(O)c1	FUWUEFKEXZQKKA-UHFFFAOYSA-N	HDAC2	Homo sapiens									1										1								26.0	164.08	2.0	1.0	1.0	1.0	1.0	1.88	37.3	PD000593	-
PD000632	SALVINORIN A	COC(=O)[C@@H]1C[C@H](OC(C)=O)C(=O)[C@H]2[C@@]1(C)CC[C@H]1C(=O)O[C@H](c3ccoc3)C[C@]21C	OBSYBRPAKCASQB-AGQYDFLVSA-N	OPRK1	Homo sapiens		1		1								1	1			1		1	1		1			1			3.0	432.18	8.0	0.0	3.0	4.0	1.0	3.0	109.11	PD093745	-
PD000709	TANSHINONE IIA	Cc1coc2c1C(=O)C(=O)c1c-2ccc2c1CCCC2(C)C	HYXITZLLTYIPOF-UHFFFAOYSA-N	APEX1	Homo sapiens									1										1							1	30.0	294.13	3.0	0.0	0.0	4.0	2.0	4.25	47.28	PD000709	-
PD000730	BICALUTAMIDE	CC(O)(CS(=O)(=O)c1ccc(F)cc1)C(=O)Nc1ccc(C#N)c(C(F)(F)F)c1	LKJPYSCBVHEWIU-UHFFFAOYSA-N	AR	Homo sapiens				1								1	1			1			1	1	1						5.0	430.06	5.0	2.0	5.0	2.0	2.0	2.88	107.26	PD000730	-
PD001216	SIMVASTATIN	CCC(C)(C)C(=O)O[C@H]1C[C@@H](C)C=C2C=C[C@H](C)[C@H](CC[C@@H]3C[C@@H](O)CC(=O)O3)[C@H]21	RYMZZMVNJRMUDD-HGQWONQESA-N	HMGCR	Homo sapiens									1				1			1			1	1							13.0	418.27	5.0	1.0	6.0	3.0	0.0	4.59	72.83	PD055475	-
PD001308	ZALCITABINE	Nc1ccn([C@H]2CC[C@@H](CO)O2)c(=O)n1	WREGKURFCTUGRC-POYBYMJQSA-N	CXCR4	Homo sapiens									1				1						1	1							8.0	211.1	6.0	2.0	2.0	2.0	1.0	-0.5	90.37	PD055260	-
PD001319	IMATINIB	Cc1ccc(NC(=O)c2ccc(CN3CCN(C)CC3)cc2)cc1Nc1nccc(-c2cccnc2)n1	KTUFNOKKBVMGRW-UHFFFAOYSA-N	PDGFRB;KIT;ABL1;ABL1,BCR	Homo sapiens		1										1	1		1	1		1	1	1						1	82.0	493.26	7.0	2.0	7.0	5.0	4.0	4.59	86.28	PD001319	-
PD001339	ELLAGIC ACID	O=c1oc2c(O)c(O)cc3c(=O)oc4c(O)c(O)cc1c4c23	AFSDNFLWKVMVRB-UHFFFAOYSA-N	CSNK2A1	Homo sapiens					1											1	1	1								1	108.0	302.01	8.0	4.0	0.0	4.0	4.0	1.31	141.34	PD001339	-
PD001353	RESVERATROL	Oc1ccc(/C=C/c2cc(O)cc(O)c2)cc1	LUKBXSAWLPMMSZ-OWOJBTEDSA-N	DPP4	Homo sapiens									1							1	1		1							1	83.0	228.08	3.0	3.0	2.0	2.0	2.0	2.97	60.69	PD055726	-
PD001430	tretinoin	CC1=C(/C=C/C(C)=C/C=C/C(C)=C/C(=O)O)C(C)(C)CCC1	SHGAZHPCJJPHSC-YCNIQYBTSA-N	RXRG	Homo sapiens									1				1			1			1	1						1	39.0	300.21	1.0	1.0	5.0	1.0	0.0	5.6	37.3	PD003380	-
PD001440	BUFEXAMAC	CCCCOc1ccc(CC(=O)NO)cc1	MXJWRABVEGLYDG-UHFFFAOYSA-N		-					1													1		1							13.0	223.12	3.0	2.0	6.0	1.0	1.0	1.91	58.56	PD001440	-
PD001506	FENOFIBRATE	CC(C)OC(=O)C(C)(C)Oc1ccc(C(=O)c2ccc(Cl)cc2)cc1	YMTINGFKWWXKFG-UHFFFAOYSA-N	FABP1	Homo sapiens									1				1			1			1	1						1	38.0	360.11	4.0	0.0	6.0	2.0	2.0	4.68	52.6	PD001506	-
PD001661	LETROZOLE	N#Cc1ccc(C(c2ccc(C#N)cc2)n2cncn2)cc1	HPJKCIUCZWXJDR-UHFFFAOYSA-N	CYP19A1	Homo sapiens				1					1				1			1			1	1	1						6.0	285.1	5.0	0.0	3.0	3.0	3.0	2.66	78.29	PD001661	-
PD001860	METHOXSALEN	COc1c2occc2cc2ccc(=O)oc12	QXKHYNVANLEOEG-UHFFFAOYSA-N	CYP1A2	Homo sapiens				1					1							1			1	1	1						11.0	216.04	4.0	0.0	1.0	3.0	3.0	2.55	52.58	PD001860	-
PD001879	PIMOZIDE	O=c1[nH]c2ccccc2n1C1CCN(CCCC(c2ccc(F)cc2)c2ccc(F)cc2)CC1	YVUQSNJEYSNKRX-UHFFFAOYSA-N	HTR7	Homo sapiens									1				1						1	1							74.0	461.23	3.0	1.0	7.0	5.0	4.0	5.86	41.03	PD001879	-
PD001884	CAPSAICIN	COc1cc(CNC(=O)CCCC/C=C/C(C)C)ccc1O	YKPUWZUDDOIDPM-SOFGYWHQSA-N	TRPV1	Homo sapiens				1								1	1			1			1	1	1						22.0	305.2	3.0	2.0	9.0	1.0	1.0	3.79	58.56	PD055348	-
PD002203	DAIDZEIN	O=c1c(-c2ccc(O)cc2)coc2cc(O)ccc12	ZQSIJRDFPHDXIC-UHFFFAOYSA-N	CA7	Homo sapiens									1										1								40.0	254.06	4.0	2.0	1.0	3.0	3.0	2.87	70.67	PD002203	-
PD002222	4'-HYDROXYCHALCONE	O=C(/C=C/c1ccccc1)c1ccc(O)cc1	UAHGNXFYLAJDIN-IZZDOVSWSA-N	F3	Homo sapiens									1										1		1						10.0	224.08	2.0	1.0	3.0	2.0	2.0	3.29	37.3	PD030139	-
PD002240	ROTENONE	C=C(C)[C@H]1Cc2c(ccc3c2O[C@@H]2COc4cc(OC)c(OC)cc4[C@@H]2C3=O)O1	JUVIOZPCNVVQFO-HBGVWJBISA-N	MT-ND4	Homo sapiens									1							1	1		1							1	27.0	394.14	6.0	0.0	3.0	5.0	2.0	3.7	63.22	PD046091	-
PD002292	INDOMETHACIN	COc1ccc2c(c1)c(CC(=O)O)c(C)n2C(=O)c1ccc(Cl)cc1	CGIGDMFJXJATDK-UHFFFAOYSA-N	AR	Homo sapiens									1				1			1			1	1						1	51.0	357.08	4.0	1.0	4.0	3.0	3.0	3.93	68.53	PD002292	-
PD002363	DIPYRIDAMOLE	OCCN(CCO)c1nc(N2CCCCC2)c2nc(N(CCO)CCO)nc(N3CCCCC3)c2n1	IZEKFCXSFNUWAM-UHFFFAOYSA-N	SLC29A1	Homo sapiens									1				1			1			1	1						1	66.0	504.32	12.0	4.0	12.0	4.0	2.0	-0.02	145.44	PD002363	-
PD002607	AG-1478	COc1cc2ncnc(Nc3cccc(Cl)c3)c2cc1OC	GFNNBHLJANVSQV-UHFFFAOYSA-N	EGFR	Homo sapiens									1										1								31.0	315.08	5.0	1.0	4.0	3.0	3.0	4.04	56.27	PD002607	-
PD002623	SU-6656	CN(C)S(=O)(=O)c1ccc2c(c1)/C(=C/c1cc3c([nH]1)CCCC3)C(=O)N2	LOGJQOUIVKBFGH-YBEGLDIGSA-N	SRC;YES1;LYN;FYN	Homo sapiens		1														1		1								1	43.0	371.13	3.0	2.0	3.0	4.0	2.0	2.64	82.27	PD038949	-
PD002650	ML002	N#Cc1c(-c2ccccc2)no[n+]1[O-]	PMYJGTWUVVVOFO-UHFFFAOYSA-N		-					1													1									19.0	187.04	4.0	0.0	1.0	2.0	2.0	0.85	76.76	PD002650	-
PD002653	PICEATANNOL	Oc1cc(O)cc(/C=C/c2ccc(O)c(O)c2)c1	CDRPUGZCRXZLFL-OWOJBTEDSA-N	ADAMTS4	Homo sapiens					1												1	1								1	29.0	244.07	4.0	4.0	2.0	2.0	2.0	2.68	80.92	PD055425	-
PD002690	MYRICETIN	O=c1c(O)c(-c2cc(O)c(O)c(O)c2)oc2cc(O)cc(O)c12	IKMDFBPHZNJCSN-UHFFFAOYSA-N		-					1											1	1	1								1	101.0	318.04	8.0	6.0	1.0	3.0	3.0	1.69	151.59	PD002690	-
PD002705	NSC 95397	O=C1C(SCCO)=C(SCCO)C(=O)c2ccccc21	MAASHDQFQDDECQ-UHFFFAOYSA-N	CDC25C	Homo sapiens									1								1		1							1	54.0	310.03	6.0	2.0	6.0	2.0	1.0	1.73	74.6	PD002705	-
PD002717	FLUSPIRILENE	O=C1NCN(c2ccccc2)C12CCN(CCCC(c1ccc(F)cc1)c1ccc(F)cc1)CC2	QOYHHIBFXOOADH-UHFFFAOYSA-N	DRD2	Homo sapiens									1							1			1	1							69.0	475.24	3.0	1.0	7.0	5.0	3.0	5.31	35.58	PD002717	-
PD002734	FEXOFENADINE	CC(C)(C(=O)O)c1ccc(C(O)CCCN2CCC(C(O)(c3ccccc3)c3ccccc3)CC2)cc1	RWTNPBWLLIMQHL-UHFFFAOYSA-N	HRH1	Homo sapiens									1				1			1			1	1							7.0	501.29	4.0	3.0	10.0	4.0	3.0	5.51	81.0	PD002734	-
PD002767	EBSELEN	O=c1c2ccccc2[se]n1-c1ccccc1	DYEFUKCXAQOFHX-UHFFFAOYSA-N		-					1													1								1	77.0	274.98	2.0	0.0	1.0	3.0	3.0	2.05	22.0	PD002767	-
PD002793	6-O-BENZYLGUANINE	Nc1nc(OCc2ccccc2)c2[nH]cnc2n1	KRWMERLEINMZFT-UHFFFAOYSA-N	MGMT	Homo sapiens												1				1			1				1				14.0	241.1	5.0	2.0	3.0	3.0	3.0	1.51	89.71	PD002793	-
PD002848	TERAZOSIN	COc1cc2nc(N3CCN(C(=O)C4CCCO4)CC3)nc(N)c2cc1OC	VCKUSRYTPJJLNI-UHFFFAOYSA-N	PGK1;ADRA1D;ADRA1B;ADRA1A	Homo sapiens				1		1							1			1		1		1	1						28.0	387.19	8.0	1.0	4.0	4.0	2.0	1.06	103.04	PD002848	-
PD002869	SALMETEROL	OCc1cc(C(O)CNCCCCCCOCCCCc2ccccc2)ccc1O	GIIZNNXWQWCKIB-UHFFFAOYSA-N	ADRB2	Homo sapiens				1								1	1						1	1	1			1			26.0	415.27	5.0	4.0	16.0	2.0	2.0	4.11	81.95	PD002869	-
PD002892	RALTITREXED	Cc1nc2ccc(CN(C)c3ccc(C(=O)N[C@@H](CCC(=O)O)C(=O)O)s3)cc2c(=O)[nH]1	IVTVGDXNLFLDRM-HNNXBMFYSA-N	SLC19A1	Homo sapiens									1				1			1			1	1							12.0	458.13	7.0	4.0	9.0	3.0	3.0	1.98	152.69	PD066184	-
PD002895	quinidine	C=C[C@H]1CN2CC[C@H]1C[C@@H]2[C@@H](O)c1ccnc2ccc(OC)cc12	LOUPRKONTZGTKE-LHHVKLHASA-N	CYP2D6	Homo sapiens									1				1			1			1	1							44.0	324.18	4.0	1.0	4.0	5.0	2.0	3.17	45.59	PD055477	-
PD002945	ZAFIRLUKAST	COc1cc(C(=O)NS(=O)(=O)c2ccccc2C)ccc1Cc1cn(C)c2ccc(NC(=O)OC3CCCC3)cc12	YEEZWCHGZNKEEK-UHFFFAOYSA-N	CYSLTR1	Homo sapiens				1					1				1			1			1	1	1						31.0	575.21	7.0	2.0	8.0	5.0	4.0	5.7	115.73	PD002945	-
PD002960	itraconazole	CCC(C)n1ncn(-c2ccc(N3CCN(c4ccc(OCC5COC(Cn6cncn6)(c6ccc(Cl)cc6Cl)O5)cc4)CC3)cc2)c1=O	VHVPQPYKVGDNFY-UHFFFAOYSA-N	CYP3A4	Homo sapiens									1										1	1						1	19.0	704.24	12.0	0.0	11.0	7.0	5.0	5.58	104.7	PD002960	-
PD002989	FLUTICASONE PROPIONATE	CCC(=O)O[C@]1(C(=O)SCF)[C@H](C)C[C@H]2[C@@H]3C[C@H](F)C4=CC(=O)C=C[C@]4(C)[C@@]3(F)[C@@H](O)C[C@@]21C	WMWTYOKRWGGJOA-CENSZEJFSA-N	NR3C1	Homo sapiens				1					1				1						1	1	1						4.0	500.18	6.0	1.0	4.0	4.0	0.0	4.43	80.67	PD055207	-
PD002995	finasteride	CC(C)(C)NC(=O)[C@H]1CC[C@H]2[C@@H]3CC[C@H]4NC(=O)C=C[C@]4(C)[C@H]3CC[C@]12C	DBEPLOCGEIEOCV-WSBQPABSSA-N	SRD5A2	Homo sapiens									1			1				1			1	1							16.0	372.28	2.0	2.0	1.0	4.0	0.0	3.81	58.2	PD055309	-
PD003002	ethinylestradiol	C#C[C@]1(O)CC[C@H]2[C@@H]3CCc4cc(O)ccc4[C@H]3CC[C@@]21C	BFPYWIDHMRZLRN-SLHNCBLASA-N	ESR1	Homo sapiens									1				1			1			1	1							27.0	296.18	2.0	2.0	0.0	4.0	1.0	3.61	40.46	PD046129	-
PD003033	PRASTERONE	C[C@]12CC[C@H]3[C@@H](CC=C4C[C@@H](O)CC[C@@]43C)[C@@H]1CCC2=O	FMGSKLZLMKYGDP-USOAJAOKSA-N	SHBG	Homo sapiens									1							1			1	1							18.0	288.21	2.0	1.0	0.0	4.0	0.0	3.88	37.3	PD055511	-
PD003114	lovastatin	CC[C@H](C)C(=O)O[C@H]1C[C@@H](C)C=C2C=C[C@H](C)[C@H](CC[C@@H]3C[C@@H](O)CC(=O)O3)[C@H]21	PCZOHLXUXFIOCF-BXMDZJJMSA-N	HMGCR	Homo sapiens				1					1				1						1	1	1						33.0	404.26	5.0	1.0	6.0	3.0	0.0	4.2	72.83	PD065512	-
PD003150	AM251	Cc1c(C(=O)NN2CCCCC2)nn(-c2ccc(Cl)cc2Cl)c1-c1ccc(I)cc1	BUZAJRPLUGXRAB-UHFFFAOYSA-N	CNR1	Homo sapiens				1								1	1			1			1		1						13.0	554.01	4.0	1.0	4.0	4.0	3.0	5.89	50.16	PD003150	-
PD003160	TRIAMCINOLONE ACETONIDE	CC1(C)O[C@@H]2C[C@H]3[C@@H]4CCC5=CC(=O)C=C[C@]5(C)[C@@]4(F)[C@@H](O)C[C@]3(C)[C@]2(C(=O)CO)O1	YNDXUCZADRHECN-JNQJZLCISA-N	NR3C1	Homo sapiens									1										1	1							6.0	434.21	6.0	2.0	2.0	5.0	0.0	2.42	93.06	PD055502	-
PD003178	cytarabine	Nc1ccn([C@@H]2O[C@H](CO)[C@@H](O)[C@@H]2O)c(=O)n1	UHDGCWIWMRVCDJ-CCXZUQQUSA-N	MDM2	Homo sapiens									1				1			1			1	1							16.0	243.09	8.0	4.0	2.0	2.0	1.0	-2.56	130.83	PD008955	-
PD003180	2-chloroadenosine	Nc1nc(Cl)nc2c1ncn2[C@@H]1O[C@H](CO)[C@@H](O)[C@H]1O	BIXYYZIIJIXVFW-UUOKFMHZSA-N	ADORA1	Homo sapiens									1				1						1								13.0	301.06	9.0	4.0	2.0	3.0	2.0	-1.33	139.54	PD074692	-
PD003210	MPS1-IN-1	COc1cc(N2CCC(O)CC2)ccc1Nc1cc(Nc2ccccc2S(=O)(=O)C(C)C)c2cc[nH]c2n1	NMJMRSQTDLRCRQ-UHFFFAOYSA-N	TTK	Homo sapiens		1	1	1		1						1			1			1	1								1.0	535.23	8.0	4.0	8.0	5.0	4.0	5.2	119.58	PD003210	-
PD003211	MK-5108	O=C(O)C1(Cc2cccc(Nc3nccs3)n2)CCC(Oc2cccc(Cl)c2F)CC1	LCVIRAZGMYMNNT-UHFFFAOYSA-N	AURKA	Homo sapiens									1			1			1				1								3.0	461.1	6.0	2.0	7.0	4.0	3.0	5.71	84.34	PD003211	1
PD010583	MK-5108	O=C(O)[C@]1(Cc2cccc(Nc3nccs3)n2)CC[C@@H](Oc2cccc(Cl)c2F)CC1	LCVIRAZGMYMNNT-VVONHTQRSA-N	AURKA	Homo sapiens		1		1					1									1	1		1						4.0	461.1	6.0	2.0	7.0	4.0	3.0	5.71	84.34	PD003211	1
PD003213	URMC-099	CN1CCN(Cc2ccc(-c3cnc4[nH]cc(-c5ccc6[nH]ccc6c5)c4c3)cc2)CC1	QKKIWEILHCXECO-UHFFFAOYSA-N	MAP3K10;MAP3K11;MAP3K9	Homo sapiens		1										1			1	1		1	1								37.0	421.23	3.0	2.0	4.0	6.0	5.0	5.13	50.95	PD003213	-
PD003214	GNE-7915	CCNc1nc(Nc2cc(F)c(C(=O)N3CCOCC3)cc2OC)ncc1C(F)(F)F	XCFLWTZSJYBCPF-UHFFFAOYSA-N	LRRK2	Homo sapiens		1		1								1			1			1	1		1						2.0	443.16	7.0	2.0	6.0	3.0	2.0	3.29	88.61	PD003214	-
PD003215	CABOZANTINIB	COc1cc2nccc(Oc3ccc(NC(=O)C4(C(=O)Nc5ccc(F)cc5)CC4)cc3)c2cc1OC	ONIQOQHATWINJY-UHFFFAOYSA-N	KDR	Homo sapiens		1		1									1		1			1		1	1						17.0	501.17	6.0	2.0	8.0	5.0	4.0	5.54	98.78	PD003215	-
PD003217	GNE-3511	N#Cc1ccnc(Nc2cc(C3CCN(C4COC4)CC3)cc(N3CCC(F)(F)C3)n2)c1	RHFIAUKMKYHHFA-UHFFFAOYSA-N	MAP3K12	Homo sapiens		1													1			1									9.0	440.21	7.0	1.0	5.0	5.0	2.0	3.52	77.31	PD003217	-
PD003219	SGX-523	Cn1cc(-c2ccc3nnc(Sc4ccc5ncccc5c4)n3n2)cn1	BCZUAADEACICHN-UHFFFAOYSA-N	MET	Homo sapiens		1		1								1	1		1			1	1								9.0	359.1	8.0	0.0	3.0	5.0	5.0	3.22	73.79	PD003219	-
PD003220	AEW-541	Nc1ncnc2c1c(-c1cccc(OCc3ccccc3)c1)cn2C1CC(CN2CCC2)C1	AECDBHGVIIRMOI-UHFFFAOYSA-N	IGF1R	Homo sapiens		1		1								1	1			1		1	1								1.0	439.24	6.0	1.0	7.0	6.0	4.0	4.92	69.2	PD003220	-
PD003221	QUIZARTINIB	CC(C)(C)c1cc(NC(=O)Nc2ccc(-c3cn4c(n3)sc3cc(OCCN5CCOCC5)ccc34)cc2)no1	CVWXJKQAOSCOAB-UHFFFAOYSA-N	FLT3	Homo sapiens		1		1								1			1			1	1	1							39.0	560.22	9.0	2.0	7.0	6.0	5.0	5.86	106.16	PD003221	-
PD003222	INFIGRATINIB	CCN1CCN(c2ccc(Nc3cc(N(C)C(=O)Nc4c(Cl)c(OC)cc(OC)c4Cl)ncn3)cc2)CC1	QADPYRIHXKWUSV-UHFFFAOYSA-N	FGFR1;FGFR2;FGFR3;FGFR4	Homo sapiens		1		1								1			1	1		1	1								32.0	559.19	8.0	2.0	8.0	4.0	3.0	5.35	95.09	PD003222	-
PD003223	ALECTINIB	CCc1cc2c(cc1N1CCC(N3CCOCC3)CC1)C(C)(C)c1[nH]c3cc(C#N)ccc3c1C2=O	KDGFLJKFZUIJMX-UHFFFAOYSA-N	EML4;ALK,EML4;ALK	Homo sapiens		1		1					1			1			1	1		1	1	1							7.0	482.27	5.0	1.0	3.0	6.0	3.0	4.77	72.36	PD003223	-
PD003224	MK-1775	C=CCn1c(=O)c2cnc(Nc3ccc(N4CCN(C)CC4)cc3)nc2n1-c1cccc(C(C)(C)O)n1	BKWJAKQVGHWELA-UHFFFAOYSA-N	WEE1	Homo sapiens		1		1											1	1		1									27.0	500.26	10.0	2.0	7.0	5.0	4.0	2.89	104.34	PD003224	-
PD003225	BI 605906	CCC(F)(F)c1cc(N2CCC(S(C)(=O)=O)CC2)nc2sc(C(N)=O)c(N)c12	IYHHRZBKXXKDDY-UHFFFAOYSA-N	IKBKB	Homo sapiens				1				1							1			1									1.0	432.11	7.0	2.0	5.0	3.0	2.0	2.49	119.38	PD003225	-
PD003228	AMG 900	Cc1csc(-c2nnc(Nc3ccc(Oc4ncccc4-c4ccnc(N)n4)cc3)c3ccccc23)c1	IVUGFMLRJOCGAS-UHFFFAOYSA-N	AURKA;AURKB;AURKC	Homo sapiens		1		1								1			1			1	1								4.0	503.15	9.0	2.0	6.0	6.0	6.0	6.64	111.73	PD003228	-
PD003232	CP-673451	COCCOc1ccc2c(c1)ncn2-c1ccc2cccc(N3CCC(N)CC3)c2n1	DEEOXSOLTLIWMG-UHFFFAOYSA-N	PDGFRB	Homo sapiens		1										1	1		1			1	1								3.0	417.22	7.0	1.0	6.0	5.0	4.0	3.53	78.43	PD003232	-
PD003233	GTPL8068	COc1ccc(N(C(=O)Oc2c(C)cccc2C)c2ccnc(Nc3ccc(N4CCN(C)CC4)cc3)n2)c(OC)c1	NBTNHSGBRGTFJS-UHFFFAOYSA-N	LCK;SRC	Homo sapiens		1										1	1		1			1	1								4.0	568.28	9.0	1.0	8.0	5.0	4.0	5.94	92.29	PD003233	-
PD003238	TX-85-1	C=CC(=O)Nc1cc(-c2nn(C3CCC(N4CCN(C(C)=O)CC4)CC3)c3ncnc(N)c23)ccc1Oc1ccccc1	FYICDSWKKFSYOM-UHFFFAOYSA-N	ERBB3	Homo sapiens		1				1						1		1	1	1		1	1								1.0	580.29	9.0	2.0	7.0	6.0	4.0	4.64	131.5	PD003238	-
PD003239	CP-724714	COCC(=O)NC/C=C/c1ccc2ncnc(Nc3ccc(Oc4ccc(C)nc4)c(C)c3)c2c1	LLVZBTWPGQVVLW-SNAWJCMRSA-N	ERBB2	Homo sapiens		1		1								1	1		1			1	1		1						6.0	469.21	7.0	2.0	9.0	4.0	4.0	4.95	98.26	PD013057	-
PD003241	DDR1 inhibitor (DDR-IN-1)	CCN1CCN(Cc2ccc(C(=O)Nc3ccc(C)c(Oc4ccc5c(c4)CC(=O)N5)c3)cc2C(F)(F)F)CC1	AOZPVMOOEJAZGK-UHFFFAOYSA-N	DDR1	Homo sapiens		1	1	1								1		1	1			1	1								2.0	552.23	5.0	2.0	7.0	5.0	3.0	5.69	73.91	PD003241	-
PD003242	CGI1746	Cc1c(NC(=O)c2ccc(C(C)(C)C)cc2)cccc1-c1cn(C)c(=O)c(Nc2ccc(C(=O)N3CCOCC3)cc2)n1	JIFCFQDXHMUPGP-UHFFFAOYSA-N	BTK	Homo sapiens		1		1								1	1		1	1		1	1								1.0	579.28	7.0	2.0	6.0	5.0	4.0	5.52	105.56	PD003242	-
PD003243	SPEBRUTINIB	C=CC(=O)Nc1cccc(Nc2nc(Nc3ccc(OCCOC)cc3)ncc2F)c1	KXBDTLQSDKGAEB-UHFFFAOYSA-N	BTK	Homo sapiens		1		1								1			1			1	1		1		1				9.0	423.17	7.0	3.0	10.0	3.0	3.0	4.25	97.4	PD003243	-
PD003244	BMX-IN-1	C=CC(=O)Nc1cc(-n2c(=O)ccc3cnc4ccc(-c5ccc(NS(C)(=O)=O)cc5)cc4c32)ccc1C	SFMJNHNUOVADRW-UHFFFAOYSA-N	BMX	Homo sapiens		1	1	1								1	1	1	1			1	1				1				7.0	524.15	6.0	2.0	6.0	5.0	5.0	5.01	110.16	PD003244	-
PD003245	GNF-5	O=C(NCCO)c1cccc(-c2cc(Nc3ccc(OC(F)(F)F)cc3)ncn2)c1	IIQUYGWWHIHOCF-UHFFFAOYSA-N	ABL1;ABL1,BCR	Homo sapiens		1	1	1								1	1	1	1	1		1	1								2.0	418.13	6.0	3.0	7.0	3.0	3.0	3.51	96.37	PD003245	-
PD003249	SELUMETINIB	Cn1cnc2c(F)c(Nc3ccc(Br)cc3Cl)c(C(=O)NOCCO)cc21	CYOHGALHFOKKQC-UHFFFAOYSA-N	MAP2K1	Homo sapiens		1		1								1			1	1		1	1	1							3.0	456.0	6.0	3.0	6.0	3.0	3.0	3.53	88.41	PD003249	-
PD003250	TRAMETINIB	CC(=O)Nc1cccc(-n2c(=O)n(C3CC3)c(=O)c3c(Nc4ccc(I)cc4F)n(C)c(=O)c(C)c32)c1	LIRYPHYGHXZJBZ-UHFFFAOYSA-N	MAP2K1,MAP2K2;MAP2K1;MAP2K2	Homo sapiens		1											1		1	1		1		1							4.0	615.08	8.0	2.0	5.0	5.0	4.0	3.94	107.13	PD003250	-
PD003253	PICTILISIB	CS(=O)(=O)N1CCN(Cc2cc3nc(-c4cccc5[nH]ncc45)nc(N4CCOCC4)c3s2)CC1	LHNIIDJUOCFXAP-UHFFFAOYSA-N	PIK3CA;PIK3CD	Homo sapiens		1										1	1		1	1		1	1								63.0	513.16	9.0	1.0	5.0	6.0	4.0	2.15	107.55	PD003253	-
PD003254	Neflamapimod	O=c1ncn2nc(Sc3ccc(F)cc3F)ccc2c1-c1c(Cl)cccc1Cl	VEPKQEUBKLEPRA-UHFFFAOYSA-N	MAPK14	Homo sapiens		1		1								1			1	1		1	1								32.0	434.98	5.0	0.0	3.0	4.0	4.0	5.49	47.26	PD003254	-
PD003256	CT-99021	Cc1c[nH]c(-c2cnc(NCCNc3ccc(C#N)cn3)nc2-c2ccc(Cl)cc2Cl)n1	AQGNHMOJWBZFQQ-UHFFFAOYSA-N	GSK3A,GSK3B;GSK3A;GSK3B	Homo sapiens		1		1								1	1		1	1		1	1		1						12.0	464.1	7.0	3.0	7.0	4.0	4.0	4.94	115.2	PD003256	-
PD003257	XMD8-92	CCOc1cc(N2CCC(O)CC2)ccc1Nc1ncc2c(n1)N(C)c1ccccc1C(=O)N2C	QAPAJIZPZGWAND-UHFFFAOYSA-N	MAPK7	Homo sapiens		1	1	1								1		1	1			1	1								5.0	474.24	8.0	2.0	5.0	5.0	3.0	3.94	94.06	PD003257	-
PD003259	AZ 191	COc1cc(N2CCN(C)CC2)ccc1Nc1nccc(-c2cn(C)c3cnccc23)n1	ZYVXTMKTGDARKR-UHFFFAOYSA-N	DYRK1B	Homo sapiens		1		1								1			1			1	1		1						4.0	429.23	8.0	1.0	5.0	5.0	4.0	3.53	71.34	PD003259	-
PD003261	SILMITASERTIB	O=C(O)c1ccc2c(c1)nc(Nc1cccc(Cl)c1)c1ccncc12	MUOKSQABCJCOPU-UHFFFAOYSA-N	CSNK2A1	Homo sapiens		1										1			1	1		1	1								19.0	349.06	4.0	2.0	3.0	4.0	4.0	4.88	75.11	PD003261	-
PD003263	PALBOCICLIB	CC(=O)c1c(C)c2cnc(Nc3ccc(N4CCNCC4)cn3)nc2n(C2CCCC2)c1=O	AHJRHEGDXFFMBM-UHFFFAOYSA-N	CDK4,CDK6;CDK4;CDK6	Homo sapiens		1		1								1	1	1	1	1		1	1	1							42.0	447.24	9.0	2.0	5.0	5.0	3.0	2.97	105.04	PD003263	-
PD003264	BMS 265246	CCCCOc1c(C(=O)c2c(F)cc(C)cc2F)cnc2[nH]ncc12	SCFMWQIQBVZOQR-UHFFFAOYSA-N	CDK1;CDK2	Homo sapiens		1										1			1			1	1								12.0	345.13	4.0	1.0	6.0	3.0	3.0	3.95	67.87	PD003264	-
PD003265	PF 4800567	Nc1ncnc2c1c(COc1cccc(Cl)c1)nn2C1CCOCC1	AUMDBEHGJRZSOO-UHFFFAOYSA-N	CSNK1E	Homo sapiens		1										1			1	1		1	1								2.0	359.11	7.0	1.0	4.0	4.0	3.0	2.99	88.08	PD003265	-
PD003266	GTPL8049	COc1ccc(N(C(=O)Nc2c(C)cccc2C)c2cc(Nc3ccc(N4CCN(C)CC4)cc3)ncn2)c(OC)c1	UYUHRKLITDJEHB-UHFFFAOYSA-N	SIK1;SIK2;SIK3	Homo sapiens		1		1								1			1	1		1	1								4.0	567.3	8.0	2.0	8.0	5.0	4.0	5.98	95.09	PD003266	-
PD003267	WZ4003	CCC(=O)Nc1cccc(Oc2nc(Nc3ccc(N4CCN(C)CC4)cc3OC)ncc2Cl)c1	SDGJBAUIGHSMRI-UHFFFAOYSA-N	NUAK1;NUAK2	Homo sapiens		1		1								1		1	1	1		1	1								2.0	496.2	8.0	2.0	8.0	4.0	3.0	4.77	91.85	PD003267	-
PD003270	PF3644022	Cc1ccc(-c2ccc3c(ccc4sc5c(c43)NC[C@@H](C)NC5=O)n2)cn1	CMWRPDHVGMHLSZ-GFCCVEGCSA-N	MAPKAPK2	Homo sapiens		1		1								1			1			1	1		1						2.0	374.12	5.0	2.0	1.0	5.0	4.0	4.36	66.91	PD026540	-
PD003276	VE-821	CS(=O)(=O)c1ccc(-c2cnc(N)c(C(=O)Nc3ccccc3)n2)cc1	DUIHHZKTCSNTGM-UHFFFAOYSA-N	ATR	Homo sapiens		1				1						1		1	1	1		1	1								2.0	368.09	6.0	2.0	4.0	3.0	3.0	2.38	115.04	PD003276	-
PD003280	BI-D1870	CC(C)CCN1c2nc(Nc3cc(F)c(O)c(F)c3)ncc2N(C)C(=O)C1C	DTEKTGDVSARYDS-UHFFFAOYSA-N	RPS6KA1;RPS6KA2;RPS6KA3;RPS6KA6	Homo sapiens		1										1			1			1	1								7.0	391.18	6.0	2.0	5.0	3.0	2.0	3.42	81.59	PD003280	-
PD003295	GSK-J4	CCOC(=O)CCNc1cc(N2CCc3ccccc3CC2)nc(-c2ccccn2)n1	WBKCKEHGXNWYMO-UHFFFAOYSA-N	KDM5B;KDM6A;KDM6B	Homo sapiens		1		1							1	1				1		1	1								4.0	417.22	7.0	1.0	7.0	4.0	3.0	3.51	80.24	PD003295	-
PD003305	skepinone-L	O=C1c2ccc(Nc3ccc(F)cc3F)cc2CCc2ccc(OC[C@H](O)CO)cc21	HXMGCTFLLWPVFM-GOSISDBHSA-N	MAPK14	Homo sapiens		1		1		1	1											1									3.0	425.14	5.0	3.0	6.0	4.0	3.0	3.77	78.79	PD028571	-
PD003309	NAVITOCLAX	CC1(C)CCC(c2ccc(Cl)cc2)=C(CN2CCN(c3ccc(C(=O)NS(=O)(=O)c4ccc(N[C@H](CCN5CCOCC5)CSc5ccccc5)c(S(=O)(=O)C(F)(F)F)c4)cc3)CC2)C1	JLYAXFNOILIKPP-KXQOOQHDSA-N	BCL2L1	Homo sapiens												1				1			1							1	5.0	973.3	11.0	2.0	16.0	7.0	4.0	8.83	128.36	PD055936	-
PD003313	ML320	COc1ccccc1[C@@H]1C2=C(CC(C)(C)CC2=O)Nc2n[nH]c(C(F)(F)F)c21	YWMJEKUKEKXNSA-CQSZACIVSA-N	GSK3B	Homo sapiens					1													1									0.0	391.15	4.0	2.0	2.0	4.0	2.0	4.64	67.01	PD036888	-
PD003316	DASA-58	Nc1cccc(S(=O)(=O)N2CCCN(S(=O)(=O)c3ccc4c(c3)OCCO4)CC2)c1	GMHIOMMKSMSRLY-UHFFFAOYSA-N	PKM	Homo sapiens					1													1									1.0	453.1	7.0	1.0	4.0	4.0	2.0	1.13	119.24	PD003316	-
PD003319	DECITABINE	Nc1ncn([C@H]2C[C@H](O)[C@@H](CO)O2)c(=O)n1	XAUDJQYHKZQPEU-KVQBGUIXSA-N	DNMT1	Homo sapiens									1							1	1		1	1						1	3.0	228.09	8.0	3.0	2.0	2.0	1.0	-2.14	123.49	PD004126	-
PD003337	ALISERTIB	COc1cc(Nc2ncc3c(n2)-c2ccc(Cl)cc2C(c2c(F)cccc2OC)=NC3)ccc1C(=O)O	ZLHFILGSQDJULK-UHFFFAOYSA-N	AURKA	Homo sapiens												1				1			1								41.0	518.12	7.0	2.0	6.0	5.0	4.0	5.75	105.93	PD003337	-
PD003346	WZ4002	C=CC(=O)Nc1cccc(Oc2nc(Nc3ccc(N4CCN(C)CC4)cc3OC)ncc2Cl)c1	ITTRLTNMFYIYPA-UHFFFAOYSA-N	EGFR	Homo sapiens		1	1	1														1					1				12.0	494.18	8.0	2.0	8.0	4.0	3.0	4.55	91.85	PD003346	-
PD003355	ML312	CC(C)NC(=O)Nc1ccc2c(c1)C(=O)N([C@H](C)CO)C[C@@H](C)[C@H](CN(C)S(=O)(=O)c1ccc(Cl)cc1)O2	NMFHWISFZINRTB-GGUMNFRJSA-N	SCARB1	Homo sapiens					1											1		1									1.0	566.2	6.0	3.0	8.0	3.0	2.0	3.41	128.28	PD028350	-
PD003361	TACROLIMUS	C=CC[C@@H]1/C=C(\C)C[C@H](C)C[C@H](OC)[C@H]2O[C@@](O)(C(=O)C(=O)N3CCCC[C@H]3C(=O)O[C@H](/C(C)=C/[C@@H]3CC[C@@H](O)[C@H](OC)C3)[C@H](C)[C@@H](O)CC1=O)[C@H](C)C[C@@H]2OC	QJJXYPPXXYFBGM-LFZNUXCKSA-N	FKBP1A	Homo sapiens		1														1		1		1							15.0	803.48	12.0	3.0	7.0	4.0	0.0	4.64	178.36	PD065462	-
PD003365	PEVONEDISTAT	NS(=O)(=O)OC[C@@H]1C[C@@H](n2ccc3c(N[C@H]4CCc5ccccc54)ncnc32)C[C@@H]1O	MPUQHZXIXSTTDU-QXGSTGNESA-N	UBA3;NEDD8	Homo sapiens		1		1					1							1		1	1								3.0	443.16	8.0	3.0	6.0	5.0	3.0	2.06	132.36	PD058003	-
PD003366	GDC-0879	OCCn1cc(-c2ccc3c(c2)CC/C3=N\O)c(-c2ccncc2)n1	DEZZLWQELQORIU-RELWKKBWSA-N	BRAF	Homo sapiens		1		1								1	1					1	1		1						22.0	334.14	6.0	2.0	4.0	4.0	3.0	2.73	83.53	PD003230	-
PD003373	AFATINIB	CN(C)C/C=C/C(=O)Nc1cc2c(Nc3ccc(F)c(Cl)c3)ncnc2cc1O[C@H]1CCOC1	ULXXDDBFHOBEHA-CWDCEQMOSA-N	EGFR,ERBB2;EGFR;ERBB2	Homo sapiens		1		1								1	1		1	1		1	1	1	1		1				39.0	485.16	7.0	2.0	8.0	4.0	3.0	4.39	88.61	PD003240	-
PD003376	BI 2536	CC[C@@H]1C(=O)N(C)c2cnc(Nc3ccc(C(=O)NC4CCN(C)CC4)cc3OC)nc2N1C1CCCC1	XQVVPGYIWAGRNI-JOCHJYFZSA-N	PLK1;PLK2;PLK3	Homo sapiens		1		1				1	1			1		1	1	1		1	1								83.0	521.31	8.0	2.0	7.0	5.0	2.0	3.56	102.93	PD003209	1
PD084898	PD084898	CC[C@H]1C(=O)N(C)c2cnc(Nc3ccc(C(=O)NC4CCN(C)CC4)cc3OC)nc2N1C1CCCC1	XQVVPGYIWAGRNI-QFIPXVFZSA-N	PLK1	Homo sapiens									1										1								3.0	521.31	8.0	2.0	7.0	5.0	2.0	3.56	102.93	PD003209	1
PD003379	Ko 143	COc1ccc2c3c([nH]c2c1)[C@H](CC(C)C)N1C(=O)[C@H](CCC(=O)OC(C)(C)C)NC(=O)[C@@H]1C3	NXNRAECHCJZNRF-JBACZVJFSA-N	ABCG2	Homo sapiens												1							1		1						3.0	469.26	5.0	2.0	6.0	4.0	2.0	3.64	100.73	PD028345	-
PD003385	GEFITINIB	COc1cc2ncnc(Nc3ccc(F)c(Cl)c3)c2cc1OCCCN1CCOCC1	XGALLCVXEZPNRQ-UHFFFAOYSA-N	GAK	Homo sapiens									1										1	1						1	96.0	446.15	7.0	1.0	8.0	4.0	3.0	4.28	68.74	PD003385	-
PD003389	tipifarnib	Cn1cncc1[C@@](N)(c1ccc(Cl)cc1)c1ccc2c(c1)c(-c1cccc(Cl)c1)cc(=O)n2C	PLHJCIYEEKOWNM-HHHXNRCGSA-N	FNTB	Homo sapiens									1							1			1								5.0	488.12	5.0	1.0	4.0	5.0	5.0	5.5	65.84	PD065389	-
PD003393	VENETOCLAX	CC1(C)CCC(CN2CCN(c3ccc(C(=O)NS(=O)(=O)c4ccc(NCC5CCOCC5)c([N+](=O)[O-])c4)c(Oc4cnc5[nH]ccc5c4)c3)CC2)=C(c2ccc(Cl)cc2)C1	LQBVNQSMGBZMKD-UHFFFAOYSA-N	BCL2	Homo sapiens		1		1												1		1		1	1						4.0	867.32	11.0	3.0	13.0	8.0	5.0	8.66	172.03	PD003393	-
PD003400	IDELALISIB	CC[C@H](Nc1ncnc2[nH]cnc12)c1nc2cccc(F)c2c(=O)n1-c1ccccc1	IFSDAJWBUCMOAH-HNNXBMFYSA-N	PIK3CD	Homo sapiens				1					1				1		1	1			1	1	1						10.0	415.16	7.0	2.0	5.0	5.0	5.0	3.75	101.38	PD055873	-
PD003402	MG-132	CC(C)C[C@@H](C=O)NC(=O)[C@H](CC(C)C)NC(=O)[C@H](CC(C)C)NC(=O)OCc1ccccc1	TZYWCYJVHRLUCT-VABKMULXSA-N	CTSK	Homo sapiens									1							1	1		1				1			1	11.0	475.3	5.0	3.0	14.0	1.0	1.0	3.59	113.6	PD055962	-
PD003404	ML029	Cc1cc2nc(NCCCO)n(CC(=O)c3cc(C(C)(C)C)c(O)c(C(C)(C)C)c3)c2cc1C	CYCGGKILBWERDJ-UHFFFAOYSA-N		-					1													1									1.0	465.3	6.0	3.0	7.0	3.0	3.0	5.63	87.38	PD003404	-
PD003409	AZ 3146	COc1cc(OC2CCN(C)CC2)ccc1Nc1ncc2c(n1)n(C1CCCC1)c(=O)n2C	YUKWVHPTFRQHMF-UHFFFAOYSA-N	TTK	Homo sapiens									1										1		1						3.0	452.25	9.0	1.0	6.0	5.0	3.0	3.47	86.44	PD003409	-
PD003410	AZD-6482	Cc1cc([C@@H](C)Nc2ccccc2C(=O)O)c2nc(N3CCOCC3)cc(=O)n2c1	IRTDIKMSKMREGO-OAHLLOKOSA-N	PIK3CB	Homo sapiens		1		1									1		1			1			1						5.0	408.18	7.0	2.0	5.0	4.0	3.0	2.71	96.17	PD022736	-
PD003411	daporinad	O=C(/C=C/c1cccnc1)NCCCCC1CCN(C(=O)c2ccccc2)CC1	KPBNHDGDUADAGP-VAWYXSNFSA-N	NAMPT	Homo sapiens				1					1							1			1		1						3.0	391.23	3.0	1.0	8.0	3.0	2.0	3.93	62.3	PD056147	-
PD003412	ONALESPIB	CC(C)c1cc(C(=O)N2Cc3ccc(CN4CCN(C)CC4)cc3C2)c(O)cc1O	IFRGXKKQHBVPCQ-UHFFFAOYSA-N	HSP90AA1;HSP90AB1;HSP90AA1,HSP90AB1	Homo sapiens		1																1									3.0	409.24	5.0	2.0	4.0	4.0	2.0	3.12	67.25	PD003412	-
PD003417	TOPOTECAN	CC[C@@]1(O)C(=O)OCc2c1cc1n(c2=O)Cc2cc3c(CN(C)C)c(O)ccc3nc2-1	UCFGDBYHRUNTLO-QHCPKHFHSA-N	EPAS1	Homo sapiens									1							1	1		1	1						1	25.0	421.16	8.0	2.0	3.0	5.0	3.0	1.85	104.89	PD055690	-
PD003419	RIGOSERTIB	COc1cc(OC)c(/C=C/S(=O)(=O)Cc2ccc(OC)c(NCC(=O)O)c2)c(OC)c1	OWBFCJROIKNMGD-BQYQJAHWSA-N	CLK3	Homo sapiens									1							1			1								3.0	451.13	8.0	2.0	11.0	2.0	2.0	2.8	120.39	PD027456	-
PD003422	ALPELISIB	Cc1nc(NC(=O)N2CCC[C@H]2C(N)=O)sc1-c1ccnc(C(C)(C)C(F)(F)F)c1	STUWGJZDJHPWGZ-LBPRGKRZSA-N	PIK3CA	Homo sapiens		1		1								1	1		1	1		1	1	1	1						4.0	441.14	5.0	2.0	4.0	3.0	2.0	3.84	101.21	PD003252	-
PD003424	RUXOLITINIB	N#CC[C@H](C1CCCC1)n1cc(-c2ncnc3[nH]ccc23)cn1	HFNKQEVNSGCOJV-OAHLLOKOSA-N	JAK1;JAK2;JAK1,JAK2	Homo sapiens		1		1								1	1		1	1		1	1	1							129.0	306.16	5.0	1.0	4.0	4.0	3.0	3.47	83.18	PD003235	-
PD003429	C25H26N2O5	COc1ccc(C2(CNC(=O)c3ccc(NC(=O)c4ccco4)cc3)CCOCC2)cc1	ZJZWZIXSGNFWQQ-UHFFFAOYSA-N	TNKS;TNKS2;TNKS,TNKS2	Homo sapiens		1										1						1	1								3.0	434.18	5.0	2.0	7.0	4.0	3.0	4.02	89.8	PD003429	-
PD003440	CANERTINIB	C=CC(=O)Nc1cc2c(Nc3ccc(F)c(Cl)c3)ncnc2cc1OCCCN1CCOCC1	OMZCMEYTWSXEPZ-UHFFFAOYSA-N	EGFR,ERBB2;ERBB2;EGFR	Homo sapiens		1		1					1									1	1		1		1				107.0	485.16	7.0	2.0	9.0	4.0	3.0	4.39	88.61	PD003440	-
PD003462	VU0155056	O=C(NCCN1CCC(n2c(=O)[nH]c3ccccc32)CC1)c1ccc2ccccc2c1	IXLLRNNFUYEADZ-UHFFFAOYSA-N	PLD1;PLD2	Homo sapiens					1													1									2.0	414.21	4.0	2.0	5.0	5.0	4.0	3.55	70.13	PD003462	-
PD003472	CD 437	O=C(O)c1ccc2cc(-c3ccc(O)c(C45CC6CC(CC(C6)C4)C5)c3)ccc2c1	LDGIHZJOIQSHPB-UHFFFAOYSA-N	RARG	Homo sapiens				1					1				1			1			1		1					1	18.0	398.19	2.0	2.0	3.0	7.0	3.0	6.38	57.53	PD003472	-
PD003474	BRIVANIB	Cc1cc2c(F)c(Oc3ncnn4cc(OC[C@@H](C)O)c(C)c34)ccc2[nH]1	WCWUXEGQKLTGDX-LLVKDONJSA-N	KDR	Homo sapiens		1																1									41.0	370.14	6.0	2.0	5.0	4.0	4.0	3.52	84.67	PD038975	-
PD003475	AZD-4547	COc1cc(CCc2cc(NC(=O)c3ccc(N4C[C@H](C)N[C@H](C)C4)cc3)n[nH]2)cc(OC)c1	VRQMAABPASPXMW-HDICACEKSA-N	FGFR1;FGFR2;FGFR3	Homo sapiens		1														1		1									7.0	463.26	6.0	3.0	8.0	4.0	3.0	3.65	91.51	PD046095	-
PD003481	BIX01294	COc1cc2nc(N3CCCN(C)CC3)nc(NC3CCN(Cc4ccccc4)CC3)c2cc1OC	OSXFATOLZGZLSK-UHFFFAOYSA-N	EHMT2	Homo sapiens		1										1				1		1	1								3.0	490.31	8.0	1.0	7.0	5.0	3.0	3.87	65.99	PD003481	-
PD003483	PD153035	COc1cc2ncnc(Nc3cccc(Br)c3)c2cc1OC	LSPANGZZENHZNJ-UHFFFAOYSA-N	EGFR	Homo sapiens									1										1								28.0	359.03	5.0	1.0	4.0	3.0	3.0	4.15	56.27	PD003483	-
PD003488	KU-55933	O=c1cc(-c2cccc3c2Sc2ccccc2S3)oc(N2CCOCC2)c1	XRKYMMUGXMWDAO-UHFFFAOYSA-N	ATM	Homo sapiens				1					1							1			1		1						5.0	395.06	6.0	0.0	2.0	5.0	3.0	4.76	42.68	PD003488	-
PD003493	SORAFENIB	CNC(=O)c1cc(Oc2ccc(NC(=O)Nc3ccc(Cl)c(C(F)(F)F)c3)cc2)ccn1	MLDQJTXFUGDVEO-UHFFFAOYSA-N	KDR	Homo sapiens									1				1						1	1						1	146.0	464.09	4.0	3.0	5.0	3.0	3.0	5.55	92.35	PD003493	-
PD003505	LAPATINIB	CS(=O)(=O)CCNCc1ccc(-c2ccc3ncnc(Nc4ccc(OCc5cccc(F)c5)c(Cl)c4)c3c2)o1	BCFGMOOMADDAQU-UHFFFAOYSA-N	EGFR,ERBB2;EGFR;ERBB2	Homo sapiens		1		1												1		1		1	1						24.0	580.13	8.0	2.0	11.0	5.0	5.0	6.14	106.35	PD003505	-
PD003506	SITAGLIPTIN	N[C@@H](CC(=O)N1CCn2c(nnc2C(F)(F)F)C1)Cc1cc(F)c(F)cc1F	MFFMDFFZMYYVKS-SECBINFHSA-N	DPP4	Homo sapiens				1								1	1			1			1	1	1						7.0	407.12	5.0	1.0	4.0	3.0	2.0	2.02	77.04	PD055222	-
PD003518	REGORAFENIB	CNC(=O)c1cc(Oc2ccc(NC(=O)Nc3ccc(Cl)c(C(F)(F)F)c3)c(F)c2)ccn1	FNHKPVJBJVTLMP-UHFFFAOYSA-N	EPHX2	Homo sapiens									1				1						1	1							24.0	482.08	4.0	3.0	5.0	3.0	3.0	5.69	92.35	PD003518	-
PD003519	PLX-4720	CCCS(=O)(=O)Nc1ccc(F)c(C(=O)c2c[nH]c3ncc(Cl)cc23)c1F	YZDJQTHVDDOVHR-UHFFFAOYSA-N	MAP2K5	Homo sapiens									1				1						1								82.0	413.04	4.0	2.0	6.0	3.0	3.0	3.88	91.92	PD003519	-
PD003549	OSI-906	CC1(O)CC(c2nc(-c3ccc4ccc(-c5ccccc5)nc4c3)c3c(N)nccn23)C1	PKCDDUHJAFVJJB-UHFFFAOYSA-N	INSRR;IGF1R;INSR	Homo sapiens		1		1														1									22.0	421.19	6.0	2.0	3.0	6.0	5.0	4.82	89.33	PD003549	-
PD003560	ML-030	COc1ccc(OC)c(-c2nnc3n2N=C(c2ccc(OC)c(OC)c2)CS3)c1	DZAUSKKPHXFGNN-UHFFFAOYSA-N	PDE4A	Homo sapiens					1													1									10.0	412.12	9.0	0.0	6.0	4.0	3.0	3.34	79.99	PD003560	-
PD003565	BIBR1532	C/C(=C\C(=O)Nc1ccccc1C(=O)O)c1ccc2ccccc2c1	PGFQXGLPJUCTOI-WYMLVPIESA-N	TERT	Homo sapiens				1				1										1									1.0	331.12	2.0	2.0	4.0	3.0	3.0	4.58	66.4	PD056034	-
PD003576	OLAPARIB	O=C(c1cc(Cc2n[nH]c(=O)c3ccccc23)ccc1F)N1CCN(C(=O)C2CC2)CC1	FDLYAMZZIXQODN-UHFFFAOYSA-N	PARP1;PARP2	Homo sapiens		1		1								1				1		1	1	1	1						12.0	434.18	4.0	1.0	4.0	5.0	3.0	2.35	86.37	PD003576	-
PD003578	ML210	Cc1onc(C(=O)N2CCN(C(c3ccc(Cl)cc3)c3ccc(Cl)cc3)CC2)c1[N+](=O)[O-]	VIBHJPDPEVVDTB-UHFFFAOYSA-N	GPX4	Homo sapiens					1											1	1	1								1	0.0	474.09	6.0	0.0	5.0	4.0	3.0	4.75	92.72	PD003578	-
PD003580	LRRK2-IN-1	COc1cc(C(=O)N2CCC(N3CCN(C)CC3)CC2)ccc1Nc1ncc2c(n1)N(C)c1ccccc1C(=O)N2C	IWMCPJZTADUIFX-UHFFFAOYSA-N	LRRK2	Homo sapiens			1	1		1												1									1.0	570.31	9.0	1.0	5.0	6.0	3.0	3.44	97.38	PD003580	-
PD003582	TUBASTATIN A	CN1CCc2c(c3ccccc3n2Cc2ccc(C(=O)NO)cc2)C1	GOVYBPLHWIEHEJ-UHFFFAOYSA-N	HDAC10;HDAC6	Homo sapiens		1		1					1							1		1	1		1						14.0	335.16	4.0	2.0	3.0	4.0	3.0	2.8	57.5	PD003582	-
PD003584	cyanoquinoline 11	N#Cc1cnc2c(Cl)cc(NCc3cnc[nH]3)cc2c1Nc1ccc(F)c(Cl)c1	ONXROKMQGCSOMG-UHFFFAOYSA-N	MAP3K8	Homo sapiens									1										1								10.0	426.06	5.0	3.0	5.0	4.0	4.0	5.63	89.42	PD003584	-
PD003589	ML050	Brc1cc2c(cc1C1Nc3ccccc3C3C=CCC31)OCO2	YOLTZIVRJAPVPH-UHFFFAOYSA-N	GPER1	Homo sapiens					1											1		1								1	7.0	369.04	3.0	1.0	1.0	5.0	2.0	5.0	30.49	PD003589	-
PD003621	MI-2	CCCc1cc2c(N3CCN(C4=NCC(C)(C)S4)CC3)ncnc2s1	SRQYLNYQAPCPIR-UHFFFAOYSA-N	MEN1	Homo sapiens						1												1									2.0	375.16	7.0	0.0	3.0	4.0	2.0	3.65	44.62	PD003621	-
PD003627	ML006	c1ccc(-c2nnc(N3CCOCC3)nc2-c2ccccc2)cc1	XAYFWWVZSYKDIS-UHFFFAOYSA-N	S1PR3	Homo sapiens					1													1									7.0	318.15	5.0	0.0	3.0	4.0	3.0	3.04	51.14	PD003627	-
PD003634	ISTRADEFYLLINE	CCn1c(=O)c2c(nc(/C=C/c3ccc(OC)c(OC)c3)n2C)n(CC)c1=O	IQVRBWUUXZMOPW-PKNBQFBNSA-N	ADORA2A	Homo sapiens												1				1			1	1							6.0	384.18	8.0	0.0	6.0	3.0	3.0	2.12	80.28	PD056848	-
PD003637	VELIPARIB	C[C@]1(c2nc3c(C(N)=O)cccc3[nH]2)CCCN1	JNAHVYVRKWKWKQ-CYBMUJFWSA-N	PARP1;PARP2	Homo sapiens		1		1								1				1		1	1		1						10.0	244.13	3.0	3.0	2.0	3.0	2.0	1.26	83.8	PD023516	-
PD003648	CHS-828	N#CN/C(=N/CCCCCCOc1ccc(Cl)cc1)Nc1ccncc1	BOIPLTNGIAPDBY-UHFFFAOYSA-N	NAMPT	Homo sapiens									1										1		1						5.0	371.15	4.0	2.0	9.0	2.0	2.0	4.21	82.33	PD003648	-
PD003657	pandacostat	O=C(/C=C/c1ccc(C(=O)N/N=C/c2ccc(O)c(O)c2O)cc1)NO	KGDMFBRXTHKRPA-GRCJMCHGSA-N	HDAC1;HDAC2;HDAC3;HDAC5;HDAC6;HDAC8	Homo sapiens						1											1	1								1	9.0	357.1	7.0	6.0	5.0	2.0	2.0	1.09	151.48	PD028336	-
PD003658	ML083	COc1ccc(S(=O)(=O)N2CCN(S(=O)(=O)c3ccc4c(c3)OCCO4)CC2)cc1	HMGDKYUJSFVHIY-UHFFFAOYSA-N	PKM	Homo sapiens					1													1									4.0	454.09	7.0	0.0	5.0	4.0	2.0	1.16	102.45	PD003658	-
PD003665	PALMOSTATIN B	CCCCCCCCCC[C@@H]1C(=O)O[C@H]1CCc1ccc(OC)c(OC)c1	ASVWFAVGLYUDFD-PMACEKPBSA-N	LYPLA1	Homo sapiens						1												1									3.0	376.26	4.0	0.0	14.0	2.0	1.0	5.71	44.76	PD028559	-
PD003671	ML031	Cc1cc(C(=O)CN2C(=O)CCC2=O)c(C)n1Cc1ccccc1	JRESCQKIRPOOEM-UHFFFAOYSA-N	S1PR2	Homo sapiens					1													1									5.0	324.15	4.0	0.0	5.0	3.0	2.0	2.48	59.38	PD003671	-
PD003674	PF-03758309	Cc1nc(Nc2n[nH]c3c2CN(C(=O)N[C@H](CN(C)C)c2ccccc2)C3(C)C)c2sccc2n1	AYCPARAPKDAOEN-LJQANCHMSA-N	PAK1;PAK4;PAK6;PAK5	Homo sapiens		1		1								1			1			1	1								6.0	490.23	7.0	3.0	6.0	5.0	4.0	4.53	102.07	PD027151	-
PD003679	GSK1210151A	COc1cc2c(cc1-c1c(C)noc1C)ncc1[nH]c(=O)n([C@H](C)c3ccccn3)c12	VUVUVNZRUGEAHB-CYBMUJFWSA-N	BRDT;BRD2;BRD3;BRD4	Homo sapiens	1	1		1								1				1		1	1								7.0	415.16	7.0	1.0	4.0	5.0	5.0	4.16	98.83	PD055943	-
PD003680	Ku60019	C[C@H]1CN(CC(=O)Nc2ccc3c(c2)Cc2cccc(-c4cc(=O)cc(N5CCOCC5)o4)c2S3)C[C@@H](C)O1	SCELLOWTHJGVIC-BGYRXZFFSA-N	ATM	Homo sapiens		1										1			1			1	1								1.0	547.21	8.0	1.0	5.0	6.0	3.0	4.25	84.25	PD003277	-
PD003688	TGX-221	Cc1cc(C(C)Nc2ccccc2)c2nc(N3CCOCC3)cc(=O)n2c1	CPRAGQJXBLMUEL-UHFFFAOYSA-N	PIK3CB	Homo sapiens				1								1				1			1		1						7.0	364.19	6.0	1.0	4.0	4.0	3.0	3.01	58.87	PD003688	-
PD003692	ML162	COc1ccc(N(C(=O)CCl)C(C(=O)NCCc2ccccc2)c2cccs2)cc1Cl	UNVKYJSNMVDZJE-UHFFFAOYSA-N		-					1												1	1								1	9.0	476.07	4.0	1.0	9.0	3.0	3.0	5.08	58.64	PD003692	-
PD003712	ML 311	CCN1CCN(C(c2ccc(C(F)(F)F)cc2)c2ccc3cccnc3c2O)CC1	NGAPBLRRJSKIRT-UHFFFAOYSA-N	MCL1	Homo sapiens					1													1									8.0	415.19	4.0	1.0	4.0	4.0	3.0	4.69	39.6	PD003712	-
PD003723	GW806742X	CN(c1ccc(NC(=O)Nc2ccc(OC(F)(F)F)cc2)cc1)c1ccnc(Nc2cccc(S(N)(=O)=O)c2)n1	SNRUTMWCDZHKKM-UHFFFAOYSA-N	KDR	Homo sapiens									1										1								3.0	573.14	8.0	4.0	8.0	4.0	4.0	5.18	151.57	PD003723	-
PD003774	GW693481X	Nc1nc(-c2ccccn2)c(-c2ccc3ncccc3n2)s1	NQQBKOGAKSBCSI-UHFFFAOYSA-N	TGFBR1	Homo sapiens												1							1		1						1.0	305.07	6.0	1.0	2.0	4.0	4.0	3.4	77.58	PD003774	-
PD003892	GSK978744A	C[C@@H](Oc1cc(-n2cnc3ccc(OC[C@@H](O)CO)cc32)sc1C(N)=O)c1ccccc1Cl	JVAPIYLPNKDKAQ-KGLIPLIRSA-N	PLK1	Homo sapiens									1										1		1						2.0	487.1	8.0	3.0	9.0	4.0	4.0	3.71	119.83	PD034784	-
PD003907	GSK579289A	C[C@@H](Oc1cc(-n2cnc3ccc(OC4CCN(C)CC4)cc32)sc1C(N)=O)c1ccccc1Cl	GILNGUYOGYOZMP-MRXNPFEDSA-N	PLK1	Homo sapiens				1					1					1					1		1						9.0	510.15	7.0	1.0	7.0	5.0	4.0	5.45	82.61	PD010767	-
PD003908	GSK571989A	C[C@@H](Oc1cc(-n2cnc3ccc(OCC4CCN(C)CC4)cc32)sc1C(N)=O)c1ccccc1Cl	FCJBLTLQBCHRIE-QGZVFWFLSA-N	PLK1	Homo sapiens									1										1		1						2.0	524.16	7.0	1.0	8.0	5.0	4.0	5.7	82.61	PD034798	-
PD003913	GSK326090A	C[C@@H](Oc1cc(-n2cnc3ccc(OCC4CCN(C)CC4)cc32)sc1C(N)=O)c1ccccc1C(F)(F)F	OPJOIUDMJCRLNO-QGZVFWFLSA-N	PLK1	Homo sapiens									1										1		1						2.0	558.19	7.0	1.0	8.0	5.0	4.0	6.07	82.61	PD034803	-
PD003915	GSK317315A	COc1ccc2ncn(-c3cc(O[C@H](C)c4ccccc4C(F)(F)F)c(C(N)=O)s3)c2c1	CVLJBLIMHPEZJC-GFCCVEGCSA-N	PLK1	Homo sapiens									1										1		1						2.0	461.1	6.0	1.0	6.0	4.0	4.0	5.35	79.37	PD034805	-
PD003916	GSK317314A	COc1ccc2ncn(-c3cc(O[C@H](C)c4ccccc4Cl)c(C(N)=O)s3)c2c1	YWNUJKWNTHEOIR-GFCCVEGCSA-N	PLK1	Homo sapiens									1										1		1						2.0	427.08	6.0	1.0	6.0	4.0	4.0	4.99	79.37	PD034806	-
PD004076	ZOLEDRONIC ACID	O=P(O)(O)C(O)(Cn1ccnc1)P(=O)(O)O	XRASPMIURGNCCH-UHFFFAOYSA-N	FDPS	Homo sapiens				1					1				1			1			1	1	1						15.0	272.0	5.0	5.0	4.0	1.0	1.0	-1.12	153.11	PD004076	-
PD004078	PLERIXAFOR	c1cc(CN2CCCNCCNCCCNCC2)ccc1CN1CCCNCCNCCCNCC1	YIQPUIGJQJDJOS-UHFFFAOYSA-N	CCR2	Homo sapiens				1					1				1			1			1	1	1						5.0	502.45	8.0	6.0	4.0	3.0	1.0	0.42	78.66	PD004078	-
PD004083	EVEROLIMUS	CO[C@H]1C[C@@H]2CC[C@@H](C)[C@@](O)(O2)C(=O)C(=O)N2CCCC[C@H]2C(=O)O[C@H]([C@H](C)C[C@@H]2CC[C@@H](OCCO)[C@H](OC)C2)CC(=O)[C@H](C)/C=C(\C)[C@@H](O)[C@@H](OC)C(=O)[C@H](C)C[C@H](C)/C=C/C=C/C=C/1C	HKVAMNSJSFKALM-GKUWKFKPSA-N	MTOR	Homo sapiens									1				1			1			1	1							7.0	957.58	14.0	3.0	9.0	4.0	0.0	6.2	204.66	PD038942	-
PD004086	PACLITAXEL	CC(=O)O[C@H]1C(=O)[C@]2(C)[C@@H](O)C[C@H]3OC[C@@]3(OC(C)=O)[C@H]2[C@H](OC(=O)c2ccccc2)[C@]2(O)C[C@H](OC(=O)[C@H](O)[C@@H](NC(=O)c3ccccc3)c3ccccc3)C(C)=C1C2(C)C	RCINICONZNJXQF-MZXODVADSA-N	TUBB3	Homo sapiens												1	1			1	1		1	1						1	44.0	853.33	14.0	4.0	10.0	7.0	3.0	3.74	221.29	PD055134	-
PD004088	DOCETAXEL	CC(=O)O[C@@]12CO[C@@H]1C[C@H](O)[C@@]1(C)C(=O)[C@H](O)C3=C(C)[C@@H](OC(=O)[C@H](O)[C@@H](NC(=O)OC(C)(C)C)c4ccccc4)C[C@@](O)([C@@H](OC(=O)c4ccccc4)[C@@H]12)C3(C)C	ZDZOTLJHXYCWBA-VCVYQWHSSA-N	KIF11	Homo sapiens									1				1			1	1		1	1						1	10.0	807.35	14.0	5.0	8.0	6.0	2.0	3.26	224.45	PD055340	-
PD004094	CERITINIB	Cc1cc(Nc2ncc(Cl)c(Nc3ccccc3S(=O)(=O)C(C)C)n2)c(OC(C)C)cc1C1CCNCC1	VERWOWGGCGHDQE-UHFFFAOYSA-N	ALK	Homo sapiens		1		1									1			1		1		1	1					1	37.0	557.22	8.0	3.0	9.0	4.0	3.0	6.36	105.24	PD004094	-
PD004103	PRALATREXATE	C#CCC(Cc1cnc2nc(N)nc(N)c2n1)c1ccc(C(=O)N[C@@H](CCC(=O)O)C(=O)O)cc1	OGSBUKJUDHAQEA-WMCAAGNKSA-N	SLC19A1	Homo sapiens									1										1	1	1						5.0	477.18	9.0	5.0	10.0	3.0	3.0	0.98	207.3	PD067767	-
PD004108	RALOXIFENE	O=C(c1ccc(OCCN2CCCCC2)cc1)c1c(-c2ccc(O)cc2)sc2cc(O)ccc12	GZUITABIAKMVPG-UHFFFAOYSA-N	ESR1	Homo sapiens									1				1			1			1	1						1	70.0	473.17	6.0	2.0	7.0	5.0	4.0	6.08	70.0	PD004108	-
PD004112	MITOXANTRONE	O=C1c2c(O)ccc(O)c2C(=O)c2c(NCCNCCO)ccc(NCCNCCO)c21	KKZJGLLVHKMTCM-UHFFFAOYSA-N	PIM1;ABCC1	Homo sapiens									1								1		1	1	1					1	66.0	444.2	10.0	8.0	12.0	3.0	2.0	-0.14	163.18	PD004112	-
PD004208	3761AH	CCOC(=O)c1c(/C(C#N)=C\N)c2ccc(Cl)c(Cl)c2n1C	CXJCGSPAPOTTSF-VURMDHGXSA-N	CLK4;CLK1;DYRK1A	Homo sapiens		1		1														1									3.0	337.04	5.0	1.0	3.0	2.0	2.0	3.48	81.04	PD003260	-
PD004324	PD004324	CN(C)C/C=C/C(=O)Nc1ccc2ncnc(Nc3cccc(Br)c3)c2c1	ZCIXBBSRVLSRJQ-QPJJXVBHSA-N	EGFR	Homo sapiens									1										1		1		1				3.0	425.09	5.0	2.0	6.0	3.0	3.0	4.19	70.15	PD036116	-
PD004582	PD004582	O=C(O)c1ccc(-c2cc3cccnc3c(-c3cccc([N+](=O)[O-])c3)n2)cc1	QTNUWEKKZHSUQO-UHFFFAOYSA-N	PDE4D	Homo sapiens				1					1							1			1		1						5.0	371.09	5.0	1.0	4.0	4.0	4.0	4.57	106.22	PD004582	-
PD004666	tofacitinib	C[C@@H]1CCN(C(=O)CC#N)C[C@@H]1N(C)c1ncnc2[nH]ccc12	UJLAWZDWDVHWOW-YPMHNXCESA-N	JAK1;JAK2;JAK3	Homo sapiens		1		1								1		1	1	1		1	1	1							39.0	312.17	5.0	1.0	3.0	3.0	2.0	1.54	88.91	PD003234	-
PD004757	LGD-2226	O=c1cc(C(F)(F)F)c2cc(N(CC(F)(F)F)CC(F)(F)F)ccc2[nH]1	ULBPQWIGZUGPHU-UHFFFAOYSA-N	AR	Homo sapiens												1							1		1						1.0	392.06	2.0	1.0	3.0	2.0	2.0	4.48	36.1	PD004757	-
PD004813	A-443654	Cc1n[nH]c2ccc(-c3cncc(OC[C@@H](N)Cc4c[nH]c5ccccc45)c3)cc12	YWTBGJGMTBHQTM-IBGZPJMESA-N	AKT1	Homo sapiens									1										1								5.0	397.19	4.0	3.0	6.0	5.0	5.0	4.36	92.61	PD025605	-
PD004830	PD004830	Cc1ncc(-c2ccnc(Nc3ccc(N4CCN(C(=O)CO)CC4)cc3)n2)n1C(C)C	PVTKDXZNSUHUMO-UHFFFAOYSA-N	CDK2	Homo sapiens									1										1								1.0	435.24	8.0	2.0	6.0	4.0	3.0	2.61	99.41	PD004830	-
PD004842	ALW-II-49-7	Cc1ccc(C(=O)Nc2cccc(C(F)(F)F)c2)cc1Nc1cncc(C(N)=O)c1	SAAYRHKJHDIDPH-UHFFFAOYSA-N	DDR2;DDR1	Homo sapiens			1	1														1									4.0	414.13	4.0	3.0	5.0	3.0	3.0	4.5	97.11	PD004842	-
PD004869	PH-797804	CNC(=O)c1ccc(C)c(-n2c(C)cc(OCc3ccc(F)cc3F)c(Br)c2=O)c1	KCAJXIDMCNPGHZ-UHFFFAOYSA-N	MAPK14	Homo sapiens				1					1					1		1			1		1						4.0	476.05	4.0	1.0	5.0	3.0	3.0	4.43	60.33	PD004869	-
PD004989	PD004989	Cc1nnc(-c2ccc(-c3cc(C(=O)NC4CC4)ccc3C)c(C)c2)o1	UBVTVSINEVHYSY-UHFFFAOYSA-N	MAPK14	Homo sapiens									1										1								2.0	347.16	4.0	1.0	4.0	4.0	3.0	4.22	68.02	PD004989	-
PD005030	PD005030	COCCNS(=O)(=O)c1ccc(Nc2nccc(-c3cnc(C)n3C(C)C)n2)cc1	LDXLQEXLXZCYSR-UHFFFAOYSA-N	CDK2	Homo sapiens									1										1								2.0	430.18	8.0	2.0	9.0	3.0	3.0	2.9	111.03	PD005030	-
PD005094	PD005094	Cc1ccc(C(=O)NCCC2CCCC2)cc1C(=O)Nc1ccc(N)nc1	CLEGTVIMOPPIBR-UHFFFAOYSA-N	KIT	Homo sapiens									1										1								4.0	366.21	4.0	3.0	6.0	3.0	2.0	3.53	97.11	PD005094	-
PD005335	PD005335	CCS(=O)(=O)c1ccc(OC)c(Nc2ncc(-c3cccc(-c4ccccn4)c3)o2)c1	HTIZPBXCJPQDEM-UHFFFAOYSA-N	KDR	Homo sapiens									1										1								2.0	435.13	7.0	1.0	7.0	4.0	4.0	4.95	94.32	PD005335	-
PD005362	PD005362	Cc1ccc(C(=O)NC2CC2)cc1-c1ccc2c(-c3ccccc3C)nncc2c1	GQXMJOSCBRZMKE-UHFFFAOYSA-N	MAPK14	Homo sapiens									1										1								4.0	393.18	3.0	1.0	4.0	5.0	4.0	5.47	54.88	PD005362	-
PD005394	PD005394	COc1cc2nccc(Oc3ccc4c(C(=O)NC5CC5)cccc4c3)c2cc1OC	ZATGFXTWDKIEKC-UHFFFAOYSA-N	KDR	Homo sapiens									1										1								9.0	414.16	5.0	1.0	6.0	5.0	4.0	5.09	69.68	PD005394	-
PD005404	PD005404	O=C(N[C@H](CO)c1ccc(F)c(Cl)c1)c1cc(-c2n[nH]cc2-c2cccc(Cl)c2)c[nH]1	YMUYGRBBEDYUOP-HXUWFJFHSA-N	MAPK1	Homo sapiens									1										1								8.0	458.07	3.0	4.0	6.0	4.0	4.0	4.98	93.8	PD019611	-
PD005440	L-778123	N#Cc1ccc(Cn2cncc2CN2CCN(c3cccc(Cl)c3)C(=O)C2)cc1	JNUGFGAVPBYSHF-UHFFFAOYSA-N	FNTB	Homo sapiens									1										1								4.0	405.14	5.0	0.0	5.0	4.0	3.0	3.31	65.16	PD005440	-
PD005452	PD005452	OCc1n[nH]nc1-c1ccc2c(-c3cc4cc(CN5CCCCC5)ccc4[nH]3)n[nH]c2c1	FNWHPLLNMLOZTL-UHFFFAOYSA-N	CHEK1	Homo sapiens									1										1								2.0	427.21	5.0	4.0	5.0	6.0	5.0	3.97	109.51	PD005452	-
PD005547	ML285	O=S(=O)(c1ccc2c(c1)OCCO2)N1CCN(S(=O)(=O)c2c(F)cccc2F)CC1	SHWNKRPMUBFWKE-UHFFFAOYSA-N	PKM	Homo sapiens					1											1		1									2.0	460.06	6.0	0.0	4.0	4.0	2.0	1.43	93.22	PD005547	-
PD005610	ML082	Cc1cc2c(s1)c1cnn(Cc3ccccc3F)c(=O)c1n2C	IEWYEWDDQWYJLU-UHFFFAOYSA-N	PKM	Homo sapiens					1													1									8.0	327.08	5.0	0.0	2.0	4.0	4.0	3.45	39.82	PD005610	-
PD005619	PD005619	C[C@](O)(c1ccc(C(=O)N(C2CC2)[C@H]2CC[C@H](c3cccnc3)CC2)cc1)C(F)(F)F	FLRYWTWLHWACRP-GRWTVWFQSA-N	HSD11B1	Homo sapiens									1										1		1						1.0	432.2	3.0	1.0	5.0	4.0	2.0	5.18	53.43	PD037225	-
PD005768	PD005768	COc1cc2ncc3c(N)nc4c(C)c(N)ccc4c3c2cc1OC	NVINUNQBDNEMSY-UHFFFAOYSA-N	PDPK1	Homo sapiens									1										1								6.0	334.14	6.0	2.0	2.0	4.0	4.0	3.43	96.28	PD005768	-
PD005778	ML026	O=C(O)c1ccc2c(c1)C(=O)N([C@H](Cc1cccc3ccccc13)C(=O)O)C2=O	CZNPWASYMRBJCX-GOSISDBHSA-N		-					1													1									1.0	389.09	4.0	2.0	5.0	4.0	3.0	2.83	111.98	PD032537	-
PD005878	IMIDAZOPYRIDAZIN 1	CC(=O)c1cccc(-c2cnc3ccc(NCC4CC4)nn23)c1	IVUBNTNWKIPCPS-UHFFFAOYSA-N	PIM1	Homo sapiens									1										1								2.0	306.15	5.0	1.0	5.0	4.0	3.0	3.42	59.29	PD005878	-
PD005950	ALDOSTERONE	C[C@]12CCC(=O)C=C1CC[C@@H]1[C@@H]2[C@@H](O)C[C@]2(C=O)[C@@H](C(=O)CO)CC[C@@H]12	PQSUYGKTWSAVDQ-ZVIOFETBSA-N	NR3C2	Homo sapiens				1								1	1						1	1	1						3.0	360.19	5.0	2.0	3.0	4.0	0.0	1.85	91.67	PD023308	-
PD005972	5-Iodotubercidin	Nc1ncnc2c1c(I)cn2[C@@H]1O[C@H](CO)[C@@H](O)[C@H]1O	WHSIXKUPQCKWBY-IOSLPCCCSA-N	ADK	Homo sapiens									1							1			1								5.0	392.0	8.0	4.0	2.0	3.0	2.0	-0.77	126.65	PD039615	-
PD006031	Sodium ascorbate	O=C1O[C@H]([C@@H](O)CO)C(=O)C1O	PJBQWWHYTVYMLO-LZUUPNLKSA-N	ADRA2B	Homo sapiens									1				1				1		1	1						1	23.0	176.03	6.0	3.0	2.0	1.0	0.0	-2.8	104.06	PD098547	-
PD006125	TO-901317	O=S(=O)(c1ccccc1)N(CC(F)(F)F)c1ccc(C(O)(C(F)(F)F)C(F)(F)F)cc1	SGIWFELWJPNFDH-UHFFFAOYSA-N	NR1H2;NR1H3;NR1H2,NR1H3;RORA	Homo sapiens		1		1	1													1									14.0	481.04	3.0	1.0	5.0	2.0	2.0	4.76	57.61	PD006125	-
PD006213	PD006213	C=CC[C@H]1N(C(=O)c2cnccc2C(F)(F)F)CCC[C@@]1(Oc1ccc(C(F)(F)F)cc1)C(=O)N1CCN(c2ccccc2OCCOC)CC1	QKOYVKQWXLFSPH-FJQKOURKSA-N	MDM2	Homo sapiens									1										1								2.0	720.27	7.0	0.0	11.0	5.0	3.0	6.49	84.44	PD082565	-
PD006288	hyperforin	CC(C)=CCC[C@]1(C)[C@@H](CC=C(C)C)C[C@]2(CC=C(C)C)C(=O)C(CC=C(C)C)C(=O)[C@@]1(C(=O)C(C)C)C2=O	GQRREYKSPJMLAW-KZFONMTISA-N	NR1I2	Homo sapiens				1								1	1						1		1						13.0	536.39	4.0	0.0	11.0	2.0	0.0	8.36	68.28	PD028450	-
PD006326	trichostatin A	CC(/C=C/C(=O)NO)=C\[C@@H](C)C(=O)c1ccc(N(C)C)cc1	RTKIYFITIVXBLE-QEQCGCAPSA-N	NCOR1;HDAC3,NCOR1	Homo sapiens									1				1						1							1	28.0	302.16	4.0	2.0	6.0	1.0	1.0	2.58	69.64	PD065400	-
PD006689	CHEMBL3416063	C=CCOc1ccc(F)cc1[C@H]1C[C@@H]1CN	FZUHWKBXUCCYPI-KOLCDFICSA-N	HTR2C	Homo sapiens												1							1		1						2.0	221.12	2.0	1.0	5.0	2.0	1.0	2.45	35.25	PD064714	-
PD006773	DIMINAZENE	N=C(N)c1ccc(/N=N/Nc2ccc(C(=N)N)cc2)cc1	XNYZHCFCZNMTFY-UHFFFAOYSA-N	AOC1	Homo sapiens									1				1						1							1	6.0	281.14	4.0	5.0	5.0	2.0	2.0	2.37	136.49	PD006773	-
PD006775	(R)-Rolipram	COc1ccc([C@@H]2CNC(=O)C2)cc1OC1CCCC1	HJORMJIFDVBMOB-LBPRGKRZSA-N	PDE4B	Homo sapiens		1																1									13.0	275.15	3.0	1.0	4.0	3.0	1.0	2.62	47.56	PD002618	-
PD006828	10-Propargyl-5,8-Dideazafolic Acid	C#CCN(Cc1ccc2[nH]c(N)nc(=O)c2c1)c1ccc(C(=O)N[C@@H](CCC(=O)O)C(=O)O)cc1	LTKHPMDRMUCUEB-IBGZPJMESA-N	TYMS	Homo sapiens									1										1		1						6.0	477.16	7.0	5.0	10.0	3.0	3.0	1.19	178.71	PD084553	1
PD084553	10-Propargyl-5,8-Dideazafolic Acid	C#CCN(Cc1ccc2nc(N)nc(O)c2c1)c1ccc(C(=O)NC(CCC(=O)O)C(=O)O)cc1	LTKHPMDRMUCUEB-UHFFFAOYSA-N	TYMS	Homo sapiens									1										1		1						9.0	477.16	8.0	5.0	10.0	3.0	3.0	1.61	178.97	PD084553	1
PD006908	PD006908	CN[C@@H](C)C(=O)N[C@H](C(=O)N1C[C@H]2CCCN2C[C@H]1C(=O)N[C@@H]1CCCc2ccccc21)C1CCCCC1	STMKHYWFPMLFAV-PWZZVKMOSA-N	BIRC3	Homo sapiens									1										1								2.0	523.35	5.0	3.0	7.0	5.0	1.0	2.53	93.78	PD084751	-
PD007284	PD007284	CN[C@@H](C)C(=O)N[C@H](C(=O)N1C[C@H]2CCCN2C[C@H]1C(=O)N[C@@H]1CCOc2ccccc21)C1CCOCC1	QIXLDZYPVVGASB-HXMYXVSTSA-N	BIRC3	Homo sapiens									1										1								2.0	527.31	7.0	3.0	7.0	5.0	1.0	0.82	112.24	PD081182	-
PD007327	PD007327	COCCOc1ccccc1N1CCN(C(=O)[C@]2(Oc3ccc(C(F)(F)F)cc3)CCCN(C(=O)c3cnccc3C(F)(F)F)[C@@H]2CCO)CC1	GOOKVWRPGSXHEA-NDKRRWIDSA-N	MDM2	Homo sapiens									1										1								3.0	724.27	8.0	1.0	11.0	5.0	3.0	5.3	104.67	PD083085	-
PD007338	PD007338	CN[C@@H](C)C(=O)N[C@H](C(=O)N1C[C@H]2CC(F)(F)CN2C[C@H]1C(=O)N[C@@H]1CCOc2ccccc21)C1CCC(F)(F)CC1	IXDGXZUXUMFSFB-JFJSIVICSA-N	BIRC3	Homo sapiens									1										1								2.0	597.29	6.0	3.0	7.0	5.0	1.0	2.47	103.01	PD085019	-
PD007371	PD007371	CN[C@@H](C)C(=O)N[C@H](C(=O)N1C[C@H]2C[C@@H](O)CN2C[C@H]1C(=O)N[C@@H]1CCOc2ccccc21)C1CCC(F)(F)CC1	UPKLMAFQDXNFGT-NHBKWFJBSA-N	BIRC3	Homo sapiens									1										1								2.0	577.31	7.0	4.0	7.0	5.0	1.0	1.19	123.24	PD083047	-
PD007563	PD007563	O=C1NCc2c(-c3ccc(F)cc3F)cc(N3CCNCC3)cc2N1c1c(Cl)cccc1Cl	YAWZIQKDHQIHOS-UHFFFAOYSA-N	MAPK14	Homo sapiens									1										1							1	2.0	488.1	3.0	2.0	3.0	5.0	3.0	5.71	47.61	PD007563	-
PD007564	PD007564	CN[C@@H](C)C(=O)N[C@H](C(=O)N1C[C@H]2CCCN2C[C@H]1C(=O)N[C@@H]1CCC(F)(F)c2ccccc21)C1CCCCC1	VHNBFMMDAIXLPT-KXTXBCJOSA-N	BIRC3	Homo sapiens									1										1								2.0	559.33	5.0	3.0	7.0	5.0	1.0	3.08	93.78	PD081112	-
PD007614	Iodo-Willardiine	N[C@@H](Cn1cc(I)c(=O)[nH]c1=O)C(=O)O	AXXYLTBQIQBTES-BYPYZUCNSA-N	GRIK5	Homo sapiens												1	1						1								13.0	324.96	5.0	3.0	3.0	1.0	1.0	-1.45	118.18	PD069157	-
PD007798	PD007798	CC(C)CCC[C@@H](C)[C@H]1CC[C@H]2[C@@H]3CC[C@H]4C[C@@H](OCc5cn([C@@H]6O[C@H](COS(=O)(=O)O)[C@@H](O[C@@H]7O[C@H](COS(=O)(=O)O)[C@H](OS(=O)(=O)O)[C@H](OS(=O)(=O)O)[C@H]7OS(=O)(=O)O)[C@H](OS(=O)(=O)O)[C@H]6OS(=O)(=O)O)nn5)CC[C@]4(C)[C@H]3CC[C@@]21C	SJTQHYMLYPZEID-ROJFQUBMSA-N	HPSE	Homo sapiens									1										1								3.0	1353.21	28.0	7.0	27.0	7.0	1.0	1.87	512.83	PD084994	-
PD008140	PD008140	NS(=O)(=O)c1ccc(Nc2nccc(-c3cnc4ccccn34)n2)cc1	NKORVPQBJCGYEC-UHFFFAOYSA-N	CDK2	Homo sapiens									1										1								2.0	366.09	7.0	2.0	4.0	4.0	4.0	2.18	115.27	PD008140	-
PD008537	PD008537	CN[C@@H](C)C(=O)N[C@H](C(=O)N1C[C@H]2C[C@@H]3C[C@@H]3N2C[C@H]1C(=O)N[C@@H]1CCOc2ccccc21)C1CCCCC1	OGTGKCOHYGILPQ-BBAYRLSSSA-N	BIRC2	Homo sapiens									1										1								2.0	537.33	6.0	3.0	7.0	6.0	1.0	1.97	103.01	PD083075	1
PD053062	PD053062	CN[C@@H](C)C(=O)N[C@H](C(=O)N1C[C@H]2C[C@H]3C[C@H]3N2C[C@H]1C(=O)N[C@@H]1CCOc2ccccc21)C1CCCCC1	OGTGKCOHYGILPQ-VIYVJXCBSA-N	BIRC2	Homo sapiens									1										1								2.0	537.33	6.0	3.0	7.0	6.0	1.0	1.97	103.01	PD083075	1
PD008555	PD008555	CC(C)CCC[C@@H](C)[C@H]1CC[C@H]2[C@@H]3CC[C@H]4C[C@@H](OCc5cn(CCCO[C@H]6O[C@H](COS(=O)(=O)O)[C@@H](OS(=O)(=O)O)[C@H](OS(=O)(=O)O)[C@@H]6O[C@H]6O[C@H](COS(=O)(=O)O)[C@@H](OS(=O)(=O)O)[C@H](O[C@H]7O[C@H](COS(=O)(=O)O)[C@@H](OS(=O)(=O)O)[C@H](O[C@H]8O[C@H](COS(=O)(=O)O)[C@@H](OS(=O)(=O)O)[C@H](O[C@H]9O[C@H](COS(=O)(=O)O)[C@@H](OS(=O)(=O)O)[C@H](OS(=O)(=O)O)[C@@H]9OS(=O)(=O)O)[C@@H]8OS(=O)(=O)O)[C@@H]…	WSRYCXXKENQCDY-VASDPKDFSA-N	FGF1	Homo sapiens									1										1								3.0	2617.02	62.0	16.0	58.0	10.0	1.0	-5.98	1149.84	PD085029	-
PD008585	8-AZAGUANINE	Nc1nc(=O)c2[nH]nnc2[nH]1	LPXQRXLUHJKZIE-UHFFFAOYSA-N		-					1													1									8.0	152.04	5.0	3.0	0.0	2.0	2.0	-1.38	113.34	PD008585	-
PD008609	Cardarine	Cc1cc(SCc2sc(-c3ccc(C(F)(F)F)cc3)nc2C)ccc1OCC(=O)O	YDBLKRPLXZNVNB-UHFFFAOYSA-N	PPARD	Homo sapiens				1					1			1	1			1			1		1						3.0	453.07	5.0	1.0	7.0	3.0	3.0	6.2	59.42	PD008609	-
PD008610	PIPENDOXIFENE	Cc1c(-c2ccc(O)cc2)n(Cc2ccc(OCCN3CCCCC3)cc2)c2ccc(O)cc12	JICOGKJOQXTAIP-UHFFFAOYSA-N	ESR1	Homo sapiens									1										1								2.0	456.24	5.0	2.0	7.0	5.0	4.0	5.94	57.86	PD008610	-
PD008696	PRALNACASAN	CCO[C@@H]1OC(=O)C[C@@H]1NC(=O)[C@@H]1CCCN2C(=O)CC[C@H](NC(=O)c3nccc4ccccc34)C(=O)N12	CXAGHAZMQSCAKJ-WAHHBDPQSA-N	CASP1	Homo sapiens				1					1							1			1		1						3.0	523.21	8.0	2.0	6.0	5.0	2.0	0.66	147.24	PD024038	-
PD009086	AMINOPTERIN	Nc1nc(N)c2nc(CNc3ccc(C(=O)N[C@@H](CCC(=O)O)C(=O)O)cc3)cnc2n1	TVZGACDUOSZQKY-LBPRGKRZSA-N	DHFR	Homo sapiens									1										1	1	1						5.0	440.16	10.0	6.0	9.0	3.0	3.0	0.24	219.33	PD001637	-
PD009158	IFENPRODIL	CC(C(O)c1ccc(O)cc1)N1CCC(Cc2ccccc2)CC1	UYNVMODNBIQBMV-UHFFFAOYSA-N	SIGMAR1	Homo sapiens									1							1			1	1							24.0	325.2	3.0	2.0	5.0	3.0	2.0	3.77	43.7	PD009158	-
PD009175	FLUTICASONE FUROATE	C[C@@H]1C[C@H]2[C@@H]3C[C@H](F)C4=CC(=O)C=C[C@]4(C)[C@@]3(F)[C@@H](O)C[C@]2(C)[C@@]1(OC(=O)c1ccco1)C(=O)SCF	XTULMSXFIHGYFS-VLSRWLAYSA-N	NR3C1	Homo sapiens									1										1	1	1						4.0	538.16	7.0	1.0	4.0	5.0	1.0	4.93	93.81	PD030752	-
PD009323	ALOGLIPTIN	Cn1c(=O)cc(N2CCC[C@@H](N)C2)n(Cc2ccccc2C#N)c1=O	ZSBOMTDTBDDKMP-OAHLLOKOSA-N	DPP4	Homo sapiens				1								1				1			1	1	1						1.0	339.17	7.0	1.0	3.0	3.0	2.0	0.39	97.05	PD063368	-
PD009345	TAMIBAROTENE	CC1(C)CCC(C)(C)c2cc(NC(=O)c3ccc(C(=O)O)cc3)ccc21	MUTNCGKQJGXKEM-UHFFFAOYSA-N	RARA	Homo sapiens												1	1						1	1							6.0	351.18	2.0	2.0	3.0	3.0	2.0	4.99	66.4	PD009345	-
PD009372	estriol	C[C@]12CC[C@@H]3c4ccc(O)cc4CC[C@H]3[C@@H]1C[C@@H](O)[C@@H]2O	PROQIPRRNZUXQM-ZXXIGWHRSA-N	ESR2	Homo sapiens									1				1						1	1							11.0	288.17	3.0	3.0	0.0	4.0	1.0	2.58	60.69	PD041172	-
PD009515	NEOSTIGMINE	CN(C)C(=O)Oc1cccc([N+](C)(C)C)c1	ALWKGYPQUAPLQC-UHFFFAOYSA-N	ACHE	Homo sapiens												1				1			1	1							7.0	223.14	2.0	0.0	2.0	1.0	1.0	1.94	29.54	PD009515	-
PD009607	FORMOTEROL	COc1ccc(CC(C)NCC(O)c2ccc(O)c(NC=O)c2)cc1	BPZSYCZIITTYBL-UHFFFAOYSA-N	ADRB2	Homo sapiens				1								1	1			1			1	1	1			1			6.0	344.17	5.0	4.0	9.0	2.0	2.0	2.22	90.82	PD009607	-
PD009664	RISEDRONIC ACID	O=P(O)(O)C(O)(Cc1cccnc1)P(=O)(O)O	IIDJRNMFWXDHID-UHFFFAOYSA-N	FDPS	Homo sapiens									1				1						1	1							4.0	283.0	4.0	5.0	4.0	1.0	1.0	-0.37	148.18	PD009664	-
PD009798	CHLORPHENIRAMINE	CN(C)CCC(c1ccc(Cl)cc1)c1ccccn1	SOYKEARSMXGVTM-UHFFFAOYSA-N	HRH1	Homo sapiens												1							1	1	1						16.0	274.12	2.0	0.0	5.0	2.0	2.0	3.82	16.13	PD009798	-
PD009808	ROSUVASTATIN	CC(C)c1nc(N(C)S(C)(=O)=O)nc(-c2ccc(F)cc2)c1/C=C/[C@@H](O)C[C@@H](O)CC(=O)O	BPRHUIZQVSMCRT-VEUZHWNKSA-N	HMGCR	Homo sapiens									1				1						1	1							5.0	481.17	7.0	3.0	10.0	2.0	2.0	2.4	140.92	PD070337	-
PD009814	ILOPROST	CC#CCC(C)[C@H](O)/C=C/[C@@H]1[C@H]2C/C(=C/CCCC(=O)O)C[C@H]2C[C@H]1O	HIFJCPQKFCZDDL-ACWOEMLNSA-N	PTGIR	Homo sapiens									1				1						1	1							15.0	360.23	3.0	3.0	8.0	2.0	0.0	3.54	77.76	PD073169	-
PD009968	PENTOSTATIN	OC[C@H]1O[C@@H](n2cnc3c2NC=NC[C@H]3O)C[C@@H]1O	FPVKHBSQESCIEP-JQCXWYLXSA-N	ADA	Homo sapiens									1				1			1			1	1							2.0	268.12	8.0	4.0	2.0	3.0	1.0	-0.99	112.13	PD065018	-
PD010025	betamethasone	C[C@H]1C[C@H]2[C@@H]3CCC4=CC(=O)C=C[C@]4(C)[C@@]3(F)[C@@H](O)C[C@]2(C)[C@@]1(O)C(=O)CO	UREBDLICKHMUKA-DVTGEIKXSA-N	NR3C1	Homo sapiens				1					1				1						1	1	1						1.0	392.2	5.0	3.0	2.0	4.0	0.0	1.9	94.83	PD003127	-
PD010145	IDOXURIDINE	O=c1[nH]c(=O)n([C@H]2C[C@H](O)[C@@H](CO)O2)cc1I	XQFRJNBWHJMXHO-RRKCRQDMSA-N	TK1	Homo sapiens									1										1	1							2.0	353.97	6.0	3.0	2.0	2.0	1.0	-1.22	104.55	PD055513	-
PD010187	pravastatin	CC[C@H](C)C(=O)O[C@H]1C[C@H](O)C=C2C=C[C@H](C)[C@H](CC[C@@H](O)C[C@@H](O)CC(=O)O)[C@H]21	TUZYXOIXSAXUGO-PZAWKZKUSA-N	HMGCR	Homo sapiens				1					1				1						1	1	1						7.0	424.25	6.0	4.0	10.0	2.0	0.0	2.44	124.29	PD073727	-
PD010243	CID755673	O=C1NCCCc2c1oc1ccc(O)cc21	AACFPJSJOWQNBN-UHFFFAOYSA-N	PRKD1	Homo sapiens					1													1									14.0	217.07	3.0	2.0	0.0	3.0	2.0	1.81	62.47	PD010243	-
PD010244	G-1	CC(=O)c1ccc2c(c1)[C@@H]1C=CC[C@@H]1[C@H](c1cc3c(cc1Br)OCO3)N2	VHSVKVWHYFBIFJ-HKZYLEAXSA-N	GPER1	Homo sapiens					1				1			1	1			1		1	1							1	1.0	411.05	4.0	1.0	2.0	5.0	2.0	5.21	47.56	PD025720	-
PD010245	EMETINE	CC[C@H]1CN2CCc3cc(OC)c(OC)cc3[C@@H]2C[C@@H]1C[C@H]1NCCc2cc(OC)c(OC)cc21	AUVVAXYIELKVAI-CKBKHPSWSA-N	RBBP9	Homo sapiens					1											1		1		1							24.0	480.3	6.0	1.0	7.0	5.0	2.0	4.94	52.19	PD068743	-
PD010246	VU0152100	COc1ccc(CNC(=O)c2sc3nc(C)cc(C)c3c2N)cc1	MDNWGCQSCGNTKH-UHFFFAOYSA-N	CHRM4	Homo sapiens					1								1					1									3.0	341.12	5.0	2.0	4.0	3.0	3.0	3.43	77.24	PD010246	-
PD010247	VU 0361737	COc1cc(NC(=O)c2ccccn2)ccc1Cl	ARYUXFNGXHNNDM-UHFFFAOYSA-N	GRM4	Homo sapiens					1								1					1									4.0	262.05	3.0	1.0	3.0	2.0	2.0	3.0	51.22	PD010247	-
PD010248	ML130	Cc1ccc(S(=O)(=O)n2c(N)nc3ccccc32)cc1	SRFABRWQVPCPRG-UHFFFAOYSA-N	NOD1	Homo sapiens					1													1									7.0	287.07	5.0	1.0	2.0	3.0	3.0	2.16	77.98	PD010248	-
PD010249	ML141	COc1ccc(C2CC(c3ccccc3)=NN2c2ccc(S(N)(=O)=O)cc2)cc1	QBNZBMVRFYREHK-UHFFFAOYSA-N	CDC42	Homo sapiens					1											1		1									9.0	407.13	5.0	1.0	5.0	4.0	3.0	3.7	84.99	PD010249	-
PD010250	ML 161	CCCC(=O)Nc1cccc(NC(=O)c2ccccc2Br)c1	DFOVLSMXPWPCFH-UHFFFAOYSA-N	F2R	Homo sapiens					1											1		1									1.0	360.05	2.0	2.0	5.0	2.0	2.0	4.44	58.2	PD010250	-
PD010251	ML167	Cc1ccc(CNc2ncnc3ccc(-c4ccc(CO)o4)cc23)o1	ROCFOIBAEVAOLQ-UHFFFAOYSA-N	CLK4	Homo sapiens					1											1		1									4.0	335.13	6.0	2.0	5.0	4.0	4.0	3.9	84.32	PD010251	-
PD010252	ML171	CC(=O)c1ccc2c(c1)Nc1ccccc1S2	JWGBOHJGWOPYCL-UHFFFAOYSA-N	NOX1	Homo sapiens					1													1									11.0	241.06	3.0	1.0	1.0	3.0	2.0	4.1	29.1	PD010252	-
PD010253	ML204	Cc1cc(N2CCCCC2)nc2ccccc12	USYRQXDHKXGTCK-UHFFFAOYSA-N	TRPC4	Homo sapiens					1								1					1									7.0	226.15	2.0	0.0	1.0	3.0	2.0	3.53	16.13	PD010253	-
PD010254	ML216	O=C(Nc1ccc(F)c(C(F)(F)F)c1)Nc1nnc(-c2ccncc2)s1	WMCOYUSJXXCHFH-UHFFFAOYSA-N	BLM	Homo sapiens					1													1									2.0	383.05	5.0	2.0	3.0	3.0	3.0	4.4	79.8	PD010254	-
PD010255	TEPP-46	Cn1c2cc(S(C)=O)sc2c2cnn(Cc3cccc(N)c3)c(=O)c21	ZWKJWVSEDISQIS-UHFFFAOYSA-N	PKM	Homo sapiens					1	1										1		1									1.0	372.07	7.0	1.0	3.0	4.0	4.0	2.32	82.91	PD010255	-
PD010256	ML277	COc1ccc(-c2csc(NC(=O)[C@H]3CCCCN3S(=O)(=O)c3ccc(C)cc3)n2)cc1	OXQNLLVUVDAEHC-OAQYLSRUSA-N	KCNQ1	Homo sapiens				1	1													1			1						1.0	471.13	6.0	1.0	6.0	4.0	3.0	4.31	88.6	PD025598	-
PD010257	VU 0364770	O=C(Nc1cccc(Cl)c1)c1ccccn1	SUYUTNCKIOLMAJ-UHFFFAOYSA-N	GRM4	Homo sapiens					1													1									5.0	232.04	2.0	1.0	2.0	2.0	2.0	2.99	41.99	PD010257	-
PD010258	ML295	COc1ccc(-c2ccc(-c3cn(C(=O)N4CCCCC4c4ccccc4)nn3)cc2)cc1	OEHLNQDRVMDXQD-UHFFFAOYSA-N	ABHD6	Homo sapiens					1	1												1					1				1.0	438.21	5.0	0.0	4.0	5.0	4.0	5.82	60.25	PD010258	-
PD010259	ML324	CN(C)CCCNC(=O)c1ccc(-c2cc(O)c3ncccc3c2)cc1	QDBVSOZTVKXUES-UHFFFAOYSA-N	KDM4A	Homo sapiens					1											1		1									5.0	349.18	4.0	2.0	6.0	3.0	3.0	3.29	65.46	PD010259	-
PD010263	GW0742	Cc1cc(SCc2sc(-c3ccc(C(F)(F)F)c(F)c3)nc2C)ccc1OCC(=O)O	HWVNEWGKWRGSRK-UHFFFAOYSA-N	PPARD	Homo sapiens				1								1	1						1		1						13.0	471.06	5.0	1.0	7.0	3.0	3.0	6.34	59.42	PD010263	-
PD010267	GW 9508	O=C(O)CCc1ccc(NCc2cccc(Oc3ccccc3)c2)cc1	DGENZVKCTGIDRZ-UHFFFAOYSA-N	FFAR1	Homo sapiens												1	1			1			1								5.0	347.15	3.0	2.0	8.0	3.0	3.0	5.11	58.56	PD010267	-
PD010273	FILGOTINIB	O=C(Nc1nc2cccc(-c3ccc(CN4CCS(=O)(=O)CC4)cc3)n2n1)C1CC1	RIJLVEAXPNLDTC-UHFFFAOYSA-N	JAK1	Homo sapiens		1		1									1			1		1		1							15.0	425.15	7.0	1.0	5.0	5.0	3.0	1.98	96.67	PD010273	-
PD010275	santacruzamate A	CCOC(=O)NCCCC(=O)NCCc1ccccc1	HTOYBIILVCHURC-UHFFFAOYSA-N	HDAC2	Homo sapiens									1										1								11.0	278.16	3.0	2.0	8.0	1.0	1.0	1.87	67.43	PD010275	-
PD010277	IDO5L	Nc1nonc1/C(=N\c1ccc(F)c(Cl)c1)NO	HGXSLPIXNPASGZ-UHFFFAOYSA-N	IDO1	Homo sapiens												1							1		1						2.0	271.03	6.0	3.0	2.0	2.0	2.0	1.5	109.56	PD010277	-
PD010282	ML323	Cc1cnc(-c2ccccc2C(C)C)nc1NCc1ccc(-n2ccnn2)cc1	VUIRVWPJNKZOSS-UHFFFAOYSA-N	USP1;WDR48;USP1,WDR48	Homo sapiens		1		1	1	1										1		1									2.0	384.21	6.0	1.0	6.0	4.0	4.0	4.77	68.52	PD010282	-
PD010283	ENTOSPLETINIB	c1cn2cc(-c3ccc4cn[nH]c4c3)nc(Nc3ccc(N4CCOCC4)cc3)c2n1	XSMSNFMDVXXHGJ-UHFFFAOYSA-N	SYK	Homo sapiens		1		1														1			1						4.0	411.18	7.0	2.0	4.0	6.0	5.0	3.85	83.37	PD010283	-
PD010298	MPI-0479605	Cc1cc(N2CCOCC2)ccc1Nc1nc(NC2CCCCC2)c2nc[nH]c2n1	OVJBNYKNHXJGSA-UHFFFAOYSA-N	TTK	Homo sapiens									1										1								1.0	407.24	7.0	3.0	5.0	5.0	3.0	3.99	90.99	PD010298	-
PD010301	NEXTURASTAT A	CCCCN(Cc1ccc(C(=O)NO)cc1)C(=O)Nc1ccccc1	JZWXMCPARMXZQV-UHFFFAOYSA-N	HDAC6	Homo sapiens									1										1		1						11.0	341.17	3.0	3.0	7.0	2.0	2.0	3.64	81.67	PD010301	-
PD010336	Atglistatin	CN(C)C(=O)Nc1cccc(-c2ccc(N(C)C)cc2)c1	AWOPBSAJHCUSAS-UHFFFAOYSA-N	PNPLA2	Homo sapiens						1										1		1									1.0	283.17	2.0	1.0	3.0	2.0	2.0	3.51	35.58	PD010336	-
PD010339	HS-173	CCOC(=O)c1cnc2ccc(-c3cncc(NS(=O)(=O)c4ccccc4)c3)cn12	SEKOTFCHZNXZMM-UHFFFAOYSA-N	PIK3CA	Homo sapiens									1										1								5.0	422.1	7.0	1.0	6.0	4.0	4.0	3.37	102.66	PD010339	-
PD010341	EPZ 004777	CC(C)N(CCCNC(=O)Nc1ccc(C(C)(C)C)cc1)C[C@H]1O[C@@H](n2ccc3c(N)ncnc32)[C@H](O)[C@@H]1O	WXRGFPHDRFQODR-ICLZECGLSA-N	DOT1L	Homo sapiens		1		1					1			1				1		1	1		1						2.0	539.32	9.0	5.0	9.0	4.0	3.0	2.85	150.79	PD065431	-
PD010351	UNC2881	CCCCNc1ncc(C(=O)NCc2ccc(-n3ccnc3)cc2)c(N[C@H]2CC[C@H](O)CC2)n1	NPVXOWLPOFYACO-XUTJKUGGSA-N	MERTK	Homo sapiens												1							1		1						3.0	463.27	8.0	4.0	10.0	4.0	3.0	3.52	116.99	PD012527	-
PD010365	NMS-873	Cc1cc(OCc2nnc(SC3CCCC3)n2-c2cccnc2)ccc1-c1ccc(S(C)(=O)=O)cc1	UJGTUKMAJVCBIS-UHFFFAOYSA-N	VCP	Homo sapiens						1												1									1.0	520.16	8.0	0.0	8.0	5.0	4.0	5.65	86.97	PD010365	-
PD010366	ROCILETINIB	C=CC(=O)Nc1cccc(Nc2nc(Nc3ccc(N4CCN(C(C)=O)CC4)cc3OC)ncc2C(F)(F)F)c1	HUFOZJXAKZVRNJ-UHFFFAOYSA-N	EGFR	Homo sapiens		1																1					1				4.0	555.22	8.0	3.0	8.0	4.0	3.0	4.78	111.72	PD010366	-
PD010379	SGC-CBP30	COc1ccc(CCc2nc3cc(-c4c(C)noc4C)ccc3n2C[C@H](C)N2CCOCC2)cc1Cl	GEPYBHCJBORHCE-SFHVURJKSA-N	CREBBP;EP300;CREBBP,EP300	Homo sapiens	1	1		1							1	1				1		1	1		1						5.0	508.22	7.0	0.0	8.0	5.0	4.0	5.48	65.55	PD000027	-
PD010385	AGI6780	O=C(Nc1cccc(C(F)(F)F)c1)Nc1cc(S(=O)(=O)NC2CC2)ccc1-c1ccsc1	CCAWRGNYALGPQH-UHFFFAOYSA-N	IDH2	Homo sapiens		1														1		1									0.0	481.07	4.0	3.0	6.0	4.0	3.0	5.52	87.3	PD010385	-
PD010387	RGFP-966	Nc1cc(F)ccc1NC(=O)/C=C/c1cnn(C/C=C/c2ccccc2)c1	BLVQHYHDYFTPDV-VCABWLAWSA-N	HDAC3	Homo sapiens		1		1												1		1									4.0	362.15	4.0	2.0	6.0	3.0	3.0	3.97	72.94	PD055787	-
PD010469	GDC-0349	CCNC(=O)Nc1ccc(-c2nc3c(c(N4CCOC[C@@H]4C)n2)CCN(C2COC2)C3)cc1	RGJOJUGRHPQXGF-INIZCTEOSA-N	MTOR	Homo sapiens									1										1								2.0	452.25	7.0	2.0	5.0	5.0	2.0	2.27	91.85	PD043358	-
PD010522	PF-477736	Cn1cc(-c2[nH]c3cc(NC(=O)[C@H](N)C4CCCCC4)cc4c(=O)[nH]ncc2c34)cn1	NDEXUOWTGYUVGA-LJQANCHMSA-N	CHEK1	Homo sapiens									1						1				1								1.0	419.21	6.0	4.0	4.0	5.0	4.0	2.65	134.48	PD032672	-
PD010550	BARICITINIB	CCS(=O)(=O)N1CC(CC#N)(n2cc(-c3ncnc4[nH]ccc34)cn2)C1	XUZMWHLSFXCVMG-UHFFFAOYSA-N	JAK1,JAK2;JAK1;JAK2	Homo sapiens		1																1		1							12.0	371.12	7.0	1.0	5.0	4.0	3.0	1.1	120.56	PD010550	-
PD010558	torin 2	Nc1ccc(-c2ccc3ncc4ccc(=O)n(-c5cccc(C(F)(F)F)c5)c4c3c2)cn1	GUXXEUUYCAYESJ-UHFFFAOYSA-N	MTOR	Homo sapiens			1	1									1					1									14.0	432.12	5.0	1.0	2.0	5.0	5.0	5.2	73.8	PD010558	-
PD010560	Sapanisertib	CC(C)n1nc(-c2ccc3oc(N)nc3c2)c2c(N)ncnc21	GYLDXIAOMVERTK-UHFFFAOYSA-N	MTOR	Homo sapiens									1				1			1			1								8.0	309.13	8.0	2.0	2.0	4.0	4.0	2.38	121.67	PD010560	-
PD010566	LONAFARNIB	NC(=O)N1CCC(CC(=O)N2CCC([C@H]3c4ncc(Br)cc4CCc4cc(Cl)cc(Br)c43)CC2)CC1	DHMTURDWPRKSOA-RUZDIDTESA-N	FNTB	Homo sapiens									1										1	1							7.0	636.05	3.0	1.0	3.0	5.0	2.0	5.91	79.53	PD070223	-
PD010573	A-803467	COc1cc(NC(=O)c2ccc(-c3ccc(Cl)cc3)o2)cc(OC)c1	VHKBTPQDHDSBSP-UHFFFAOYSA-N	SCN10A	Homo sapiens												1							1		1						12.0	357.08	4.0	1.0	5.0	3.0	3.0	4.87	60.7	PD010573	-
PD010575	vistusertib	CNC(=O)c1cccc(-c2ccc3c(N4CCOC[C@@H]4C)nc(N4CCOC[C@@H]4C)nc3n2)c1	JUSFANSTBFGBAF-IRXDYDNUSA-N	MTOR	Homo sapiens		1		1								1			1			1	1		1						9.0	462.24	8.0	1.0	4.0	5.0	3.0	2.5	92.71	PD003275	-
PD010588	AGI-5198(IDH C35)	Cc1ccccc1C(C(=O)NC1CCCCC1)N(C(=O)Cn1ccnc1C)c1cccc(F)c1	FNYGWXSATBUBER-UHFFFAOYSA-N	IDH1	Homo sapiens		1		1								1						1	1		1						1.0	462.24	4.0	1.0	7.0	4.0	3.0	4.86	67.23	PD010588	-
PD010595	ML347	COc1ccc(-c2cnc3c(-c4cccc5ncccc45)cnn3c2)cc1	FVRYPYDPKSZGNS-UHFFFAOYSA-N	BMP4;ACVR1	Homo sapiens					1								1					1									6.0	352.13	5.0	0.0	3.0	5.0	5.0	4.62	52.31	PD010595	-
PD010610	tazemetostat	CCN(c1cc(-c2ccc(CN3CCOCC3)cc2)cc(C(=O)NCc2c(C)cc(C)[nH]c2=O)c1C)C1CCOCC1	NSQSAUGJQHDYNO-UHFFFAOYSA-N	EZH2	Homo sapiens		1		1								1				1		1	1	1							4.0	572.34	6.0	2.0	9.0	5.0	3.0	4.73	86.9	PD010610	-
PD010630	GSK2334470	CNc1nc(-c2ccc3c(N)n[nH]c3c2)cc(N2C[C@@H](C(=O)NC3CCCCC3)CC[C@H]2C)n1	QLPHOXTXAKOFMU-WBVHZDCISA-N	PDK1;PDPK1	Homo sapiens		1		1					1			1		1	1	1		1	1		1						5.0	462.29	7.0	4.0	5.0	5.0	3.0	3.7	124.85	PD003284	-
PD010633	SGC0946	CC(C)N(CCCNC(=O)Nc1ccc(C(C)(C)C)cc1)C[C@H]1O[C@@H](n2cc(Br)c3c(N)ncnc32)[C@H](O)[C@@H]1O	IQCKJUKAQJINMK-HUBRGWSESA-N	DOT1L	Homo sapiens		1		1						1	1	1				1		1	1								2.0	617.23	9.0	5.0	9.0	4.0	3.0	3.61	150.79	PD000006	-
PD010639	AZ20	C[C@@H]1COCCN1c1cc(C2(S(C)(=O)=O)CC2)nc(-c2cccc3[nH]ccc23)n1	SCGCBAAYLFTIJU-CQSZACIVSA-N	ATR	Homo sapiens									1										1								4.0	412.16	6.0	1.0	4.0	5.0	3.0	2.88	88.18	PD056005	-
PD010645	XL019	O=C(Nc1ccc(-c2ccnc(Nc3ccc(N4CCOCC4)cc3)n2)cc1)[C@@H]1CCCN1	ISOCDPQFIXDIMS-QHCPKHFHSA-N	JAK2	Homo sapiens		1											1					1									3.0	444.23	7.0	3.0	6.0	5.0	3.0	3.41	91.41	PD065432	-
PD010666	JNK-IN-7	Cc1cc(NC(=O)c2cccc(NC(=O)/C=C/CN(C)C)c2)ccc1Nc1nccc(-c2cccnc2)n1	GJFCSAPFHAXMSF-UXBLZVDNSA-N	MAPK8;MAPK9;MAPK10	Homo sapiens		1	1	1								1		1				1	1								11.0	507.24	7.0	3.0	9.0	4.0	4.0	4.9	112.14	PD003255	-
PD010684	GW-788388	O=C(NC1CCOCC1)c1ccc(-c2cc(-c3c[nH]nc3-c3ccccn3)ccn2)cc1	SAGZIBJAQGBRQA-UHFFFAOYSA-N	TGFBR1	Homo sapiens		1		1					1									1	1		1						3.0	425.19	5.0	2.0	5.0	5.0	4.0	4.11	92.79	PD010684	-
PD010688	CCT137690	Cc1cc(CN2CCN(c3c(Br)cnc4[nH]c(-c5ccc(N6CCN(C)CC6)cc5)nc34)CC2)no1	GFLQCBTXTRCREJ-UHFFFAOYSA-N	FLT3	Homo sapiens									1										1								4.0	550.18	8.0	1.0	5.0	6.0	4.0	3.76	80.56	PD010688	-
PD010790	LUTEOLIN	O=c1cc(-c2ccc(O)c(O)c2)oc2cc(O)cc(O)c12	IQPNAANSBPBGFQ-UHFFFAOYSA-N	CA7	Homo sapiens									1								1		1							1	112.0	286.05	6.0	4.0	1.0	3.0	3.0	2.28	111.13	PD010790	-
PD010809	TUBACIN	O=C(CCCCCCC(=O)Nc1ccc([C@@H]2O[C@H](c3ccc(CO)cc3)C[C@H](CSc3nc(-c4ccccc4)c(-c4ccccc4)o3)O2)cc1)NO	BHUZLJOUHMBZQY-YXQOSMAKSA-N	HDAC6	Homo sapiens		1		1					1									1	1		1						13.0	721.28	9.0	4.0	16.0	6.0	5.0	8.62	143.15	PD024730	-
PD010817	UK 383367	NC(=O)c1noc([C@H](CCCC2CCCCC2)CC(=O)NO)n1	ARJCBSRIPGJMAD-LLVKDONJSA-N	BMP1	Homo sapiens				1								1				1			1		1						5.0	324.18	6.0	3.0	8.0	2.0	1.0	1.9	131.34	PD032792	-
PD010824	AZ-960	Cc1cc(Nc2nc(N[C@@H](C)c3ccc(F)cc3)c(C#N)cc2F)n[nH]1	SUNXHXDJOIXABJ-NSHDSACASA-N	JAK2	Homo sapiens		1																1									2.0	354.14	5.0	3.0	5.0	3.0	3.0	4.18	89.42	PD065425	-
PD010839	GANDOTINIB	Cc1cc(Nc2cc(CN3CCOCC3)c3nc(C)c(Cc4ccc(Cl)cc4F)n3n2)[nH]n1	SQSZANZGUXWJEA-UHFFFAOYSA-N	JAK2	Homo sapiens		1											1					1									3.0	469.18	7.0	2.0	6.0	5.0	4.0	4.03	83.37	PD010839	-
PD010895	PF 3845	O=C(Nc1cccnc1)N1CCC(Cc2cccc(Oc3ccc(C(F)(F)F)cn3)c2)CC1	NBOJHRYUGLRASX-UHFFFAOYSA-N	FAAH	Homo sapiens		1											1					1					1				1.0	456.18	4.0	1.0	5.0	4.0	3.0	5.77	67.35	PD010895	-
PD010899	WYE-125132	CNC(=O)Nc1ccc(-c2nc(N3CC4CCC(C3)O4)c3cnn(C4CCC5(CC4)OCCO5)c3n2)cc1	QLHHRYZMBGPBJG-UHFFFAOYSA-N	MTOR	Homo sapiens									1										1								2.0	519.26	9.0	2.0	4.0	7.0	3.0	3.47	115.66	PD010899	-
PD010909	URB597	NC(=O)c1cccc(-c2cccc(OC(=O)NC3CCCCC3)c2)c1	ROFVXGGUISEHAM-UHFFFAOYSA-N	FAAH	Homo sapiens												1	1			1			1								6.0	338.16	3.0	2.0	4.0	3.0	2.0	3.87	81.42	PD010909	-
PD010917	GSK-256066	COc1cccc(Nc2c(C(N)=O)cnc3c(C)cc(S(=O)(=O)c4cccc(C(=O)N(C)C)c4)cc23)c1	JFHROPTYMMSOLG-UHFFFAOYSA-N	PDE4B	Homo sapiens		1							1									1	1								2.0	518.16	7.0	2.0	7.0	4.0	4.0	3.93	131.69	PD010917	-
PD011035	WYE-354	COC(=O)Nc1ccc(-c2nc(N3CCOCC3)c3cnn(C4CCN(C(=O)OC)CC4)c3n2)cc1	IMXHGCRIEAKIBU-UHFFFAOYSA-N	MTOR	Homo sapiens									1										1		1						5.0	495.22	10.0	1.0	4.0	5.0	3.0	2.91	123.94	PD011035	-
PD011043	AMUVATINIB	S=C(NCc1ccc2c(c1)OCO2)N1CCN(c2ncnc3c2oc2ccccc23)CC1	FOFDIMHVKGYHRU-UHFFFAOYSA-N	PDGFRA	Homo sapiens									1										1		1						6.0	447.14	7.0	1.0	3.0	6.0	4.0	3.3	75.89	PD011043	-
PD011102	XAV-939	Oc1nc(-c2ccc(C(F)(F)F)cc2)nc2c1CSCC2	KLGQSVMIPOVQAX-UHFFFAOYSA-N	PARP1;PARP2;TNKS;TNKS2;TNKS,TNKS2	Homo sapiens		1										1				1		1	1								10.0	312.05	4.0	1.0	1.0	3.0	2.0	3.66	46.01	PD011102	-
PD011103	BIIB021	COc1c(C)cnc(Cn2cnc3c(Cl)nc(N)nc32)c1C	QULDDKSCVCJTPV-UHFFFAOYSA-N	HSP90AA1,HSP90AB1;HSP90AA1;HSP90AB1	Homo sapiens		1																1									5.0	318.1	7.0	1.0	3.0	3.0	3.0	2.13	91.74	PD011103	-
PD011130	JNJ-38877605	Cn1cc(-c2ccc3nnc(C(F)(F)c4ccc5ncccc5c4)n3n2)cn1	JRWCBEOAFGHNNU-UHFFFAOYSA-N	MET	Homo sapiens				1					1							1			1		1						3.0	377.12	7.0	0.0	3.0	5.0	5.0	3.21	73.79	PD011130	-
PD011154	AUY922	CCNC(=O)c1noc(-c2cc(C(C)C)c(O)cc2O)c1-c1ccc(CN2CCOCC2)cc1	NDAZATDQFDPQBD-UHFFFAOYSA-N	HSP90AA1;HSP90AB1;HSP90AA1,HSP90AB1	Homo sapiens		1		1												1		1									6.0	465.23	7.0	3.0	7.0	4.0	3.0	4.13	108.06	PD011154	-
PD011179	ORANTINIB	Cc1[nH]c(/C=C2\C(=O)Nc3ccccc32)c(C)c1CCC(=O)O	NHFDRBXTEDBWCZ-ZROIWOOFSA-N	FLT3	Homo sapiens									1										1								10.0	310.13	2.0	3.0	4.0	3.0	2.0	3.14	82.19	PD046098	-
PD011187	PHA-680632	CCc1cccc(CC)c1NC(=O)N1Cc2[nH]nc(NC(=O)c3ccc(N4CCN(C)CC4)cc3)c2C1	OBWNXGOQPLDDPS-UHFFFAOYSA-N	AURKA	Homo sapiens									1										1		1						3.0	501.29	5.0	3.0	6.0	5.0	3.0	4.09	96.6	PD011187	-
PD011188	ISPINESIB	Cc1ccc(C(=O)N(CCCN)[C@@H](c2nc3cc(Cl)ccc3c(=O)n2Cc2ccccc2)C(C)C)cc1	QJZRFPJCWMNVAV-HHHXNRCGSA-N	KIF11	Homo sapiens									1							1			1								4.0	516.23	5.0	1.0	9.0	4.0	4.0	5.59	81.22	PD030176	-
PD011189	Aurora A inhibitor I	CCN1CCN(C(=O)Cc2ccc(Nc3ncc(F)c(Nc4ccc(C(=O)Nc5ccccc5Cl)cc4)n3)cc2)CC1	AKSIZPIFQAYJGF-UHFFFAOYSA-N	AURKA	Homo sapiens									1										1		1						3.0	587.22	7.0	3.0	9.0	5.0	4.0	5.72	102.49	PD011189	-
PD011359	curcumin	COc1cc(/C=C/C(=O)CC(=O)/C=C/c2ccc(O)c(OC)c2)ccc1O	VFLDPWHFBUODDF-FCXRPNKRSA-N	F3	Homo sapiens									1								1		1	1			1			1	129.0	368.13	6.0	2.0	8.0	2.0	2.0	3.37	93.06	PD003342	-
PD012021	ESTRADIOL BENZOATE	C[C@]12CC[C@@H]3c4ccc(OC(=O)c5ccccc5)cc4CC[C@H]3[C@@H]1CC[C@@H]2O	UYIFTLBWAOGQBI-BZDYCCQFSA-N	ESR1	Homo sapiens												1							1	1	1						16.0	376.2	3.0	1.0	2.0	5.0	2.0	5.12	46.53	PD055272	-
PD012042	oleanolic acid	CC1(C)CC[C@]2(C(=O)O)CC[C@]3(C)C(=CC[C@@H]4[C@@]5(C)CC[C@H](O)C(C)(C)[C@@H]5CC[C@]43C)[C@@H]2C1	MIJYXULNPSFWEK-GTOFXWBISA-N	F3	Homo sapiens				1					1				1			1			1		1						22.0	456.36	2.0	2.0	1.0	5.0	0.0	7.23	57.53	PD027196	-
PD012044	URSOLIC ACID	C[C@@H]1[C@H]2C3=CC[C@@H]4[C@@]5(C)CC[C@H](O)C(C)(C)[C@@H]5CC[C@@]4(C)[C@]3(C)CC[C@@]2(C(=O)O)CC[C@H]1C	WCGUUGGRBIKTOS-GPOJBZKASA-N	RELA	Homo sapiens									1								1		1							1	29.0	456.36	2.0	2.0	1.0	5.0	0.0	7.09	57.53	PD055485	-
PD012235	GW-1100	CCOC(=O)c1ccc(-n2cc(Cc3cnc(OCC)nc3)c(=O)nc2SCc2ccc(F)cc2)cc1	PTPNCCWOTBBVJR-UHFFFAOYSA-N	FFAR1	Homo sapiens		1											1					1									1.0	520.16	9.0	0.0	10.0	4.0	4.0	4.62	96.2	PD012235	-
PD012237	DGAT-1 inhibitor 2	CC1(C)Oc2ncnc(N)c2N=C1c1ccc(C23CCC(CC(=O)O)(CC2)CC3)cc1	VGPKUACRBMPJLF-UHFFFAOYSA-N	DGAT1	Homo sapiens									1										1								2.0	420.22	6.0	2.0	4.0	6.0	2.0	4.42	110.69	PD012237	-
PD012249	T863	CC1(C)Oc2ncnc(N)c2N=C1c1ccc([C@H]2CC[C@H](CC(=O)O)CC2)cc1	FUIYMYNYUHVDPT-HDJSIYSDSA-N	DGAT1	Homo sapiens									1										1		1						2.0	394.2	6.0	2.0	4.0	4.0	2.0	4.1	110.69	PD022464	-
PD012266	AZD6738	C[C@@H]1COCCN1c1cc(C2([S@](C)(=N)=O)CC2)nc(-c2ccnc3[nH]ccc23)n1	OHUHVTCQTUDPIJ-JYCIKRDWSA-N	ATR	Homo sapiens									1										1		1						2.0	412.17	7.0	2.0	4.0	5.0	3.0	2.91	107.85	PD056549	-
PD012271	GR79236	OC[C@H]1O[C@@H](n2cnc3c(N[C@H]4CCC[C@@H]4O)ncnc32)[C@H](O)[C@@H]1O	GYWXTRVEUURNEW-TVDBPQCTSA-N	ADORA1	Homo sapiens												1							1								4.0	351.15	10.0	5.0	4.0	4.0	2.0	-1.24	145.78	PD066679	-
PD012275	PF-04418948	COc1ccc2cc(OCC3(C(=O)O)CN(C(=O)c4ccc(F)cc4)C3)ccc2c1	LWJGMYMNSNVCEM-UHFFFAOYSA-N	PTGER2	Homo sapiens				1			1						1					1									4.0	409.13	4.0	1.0	6.0	4.0	3.0	3.59	76.07	PD012275	-
PD012391	SR9243	Cc1cc(C)c(S(=O)(=O)N(CCc2cccc(Br)c2)Cc2ccc(-c3cccc(S(C)(=O)=O)c3)cc2)c(C)c1	FYQFEJFTCLKXTQ-UHFFFAOYSA-N	NR1H2;NR1H3;NR1H2,NR1H3	Homo sapiens		1														1		1									0.0	625.1	4.0	0.0	9.0	4.0	4.0	6.88	71.52	PD012391	-
PD012393	JH-II-127	CNc1[nH]c(Nc2ccc(C(=O)N3CCOCC3)cc2OC)nc2ncc(Cl)c1-2	HUEKBQXFNHWTQQ-UHFFFAOYSA-N	LRRK2	Homo sapiens			1	1										1		1		1									3.0	416.14	7.0	3.0	5.0	4.0	1.0	2.83	104.4	PD012393	-
PD012408	Dafadine-A	Cc1cccc(C)c1OCc1cc(C(=O)N2CCC(c3ccncc3)CC2)no1	WNSNPYIHDMIFOO-UHFFFAOYSA-N		-						1												1									1.0	391.19	5.0	0.0	5.0	4.0	3.0	4.29	68.46	PD012408	-
PD012412	CNX-1351	CC(C)=CC(=O)CCC(=O)N1CCN(Cc2cc3nc(-c4cccc5[nH]ncc45)nc(N4CCOCC4)c3s2)CC1	DLNUPKDFXMWRFP-UHFFFAOYSA-N	PIK3CA	Homo sapiens									1										1		1						4.0	573.25	9.0	1.0	8.0	6.0	4.0	4.03	107.55	PD012412	-
PD012424	PU-WS13	CC(C)NCCCn1c(Sc2cc(Cl)cc(Cl)c2)nc2c(N)ncnc21	JYSLFQTWNRYWJT-UHFFFAOYSA-N	HSP90B1	Homo sapiens						1										1		1									4.0	410.08	7.0	2.0	7.0	3.0	3.0	4.25	81.65	PD012424	-
PD012425	GSK5959	COc1ccccc1C(=O)Nc1cc2c(cc1N1CCCCC1)n(C)c(=O)n2C	LTUGYAOMCKNTGG-UHFFFAOYSA-N	BRPF1	Homo sapiens		1										1				1		1	1								4.0	394.2	6.0	1.0	4.0	4.0	3.0	3.13	68.5	PD012425	-
PD012426	RQ-00203078	O=C(O)c1ccc(S(=O)(=O)N(Cc2ccc(OC(F)(F)F)cc2)c2ncc(C(F)(F)F)cc2Cl)cc1	IJGQFZYYEHCCIZ-UHFFFAOYSA-N	TRPM8	Homo sapiens												1							1		1						1.0	554.01	5.0	1.0	7.0	3.0	3.0	5.75	96.8	PD012426	-
PD012435	GW 441756	Cn1cc(/C=C2\C(=O)Nc3cccnc32)c2ccccc21	NXNQLECPAXXYTR-LCYFTJDESA-N	NTRK1	Homo sapiens									1										1		1						1.0	275.11	3.0	1.0	1.0	4.0	3.0	3.07	46.92	PD003852	-
PD012470	BI00645435	C[C@@H]1CCNC(=O)c2cc3ccc(C(=O)Nc4nc5ccccc5n4CCCN(C)C)cc3n21	ZHMXXVNQAFCXKK-QGZVFWFLSA-N	RPS6KA3	Homo sapiens		1		1										1	1			1			1						16.0	458.24	6.0	2.0	6.0	5.0	4.0	3.89	84.19	PD026146	-
PD012474	AM095	Cc1noc(-c2ccc(-c3ccc(CC(=O)O)cc3)cc2)c1NC(=O)O[C@H](C)c1ccccc1	LNDDRUPAICPXIN-GOSISDBHSA-N	LPAR1	Homo sapiens												1	1			1			1								1.0	456.17	5.0	2.0	7.0	4.0	4.0	6.25	101.66	PD025845	-
PD012519	FIBOFLAPON	CCOc1ccc(-c2ccc(Cn3c(CC(C)(C)C(=O)O)c(SC(C)(C)C)c4cc(OCc5ccc(C)cn5)ccc43)cc2)cn1	DFQGDHBGRSTTHX-UHFFFAOYSA-N	ALOX5AP	Homo sapiens												1							1		1						4.0	637.3	7.0	1.0	12.0	5.0	5.0	8.98	86.47	PD012519	-
PD012523	GSK2830371	Cc1ncc(Cl)cc1NCc1ccc(C(=O)N[C@@H](CC2CCCC2)C(=O)NC2CC2)s1	IVDUVEGCMXCMSO-FQEVSTJZSA-N	PPM1D	Homo sapiens						1										1		1									1.0	460.17	5.0	3.0	9.0	4.0	2.0	4.67	83.12	PD032718	-
PD012524	Onvansertib	CN1CCN(c2ccc(OC(F)(F)F)c(Nc3ncc4c(n3)-c3c(c(C(N)=O)nn3CCO)CC4)c2)CC1	QHLVBNKYJGBCQJ-UHFFFAOYSA-N	PLK1	Homo sapiens									1										1							1	5.0	532.22	10.0	3.0	7.0	5.0	3.0	1.92	134.66	PD012524	-
PD012554	SCHEMBL16197843	CCC(CC)n1ccc2c(C(=O)NCc3c(C)cc(C)[nH]c3=O)cc(C#N)cc21	PFHDWRIVDDIFRP-UHFFFAOYSA-N	EZH2	Homo sapiens		1		1								1				1		1	1								1.0	390.21	4.0	2.0	6.0	3.0	3.0	4.11	90.68	PD012554	-
PD012641	HQP1351	Cc1ccc(C(=O)Nc2ccc(CN3CCN(C)CC3)c(C(F)(F)F)c2)cc1C#Cc1cnc2[nH]ncc2c1	TZKBVRDEOITLRB-UHFFFAOYSA-N	ABL1,BCR;ABL1	Homo sapiens									1										1		1						3.0	532.22	5.0	2.0	4.0	5.0	4.0	4.68	77.15	PD012641	-
PD012659	MS436	Cc1cc(/N=N/c2ccc(S(=O)(=O)Nc3ccccn3)cc2)c(N)cc1O	DZTGIRNXWSZBIM-QURGRASLSA-N	BRD4	Homo sapiens		1																1								1	8.0	383.11	7.0	3.0	5.0	3.0	3.0	3.89	130.03	PD026844	-
PD012674	GSK2656157	Cc1cccc(CC(=O)N2CCc3c2ccc(-c2cn(C)c4ncnc(N)c24)c3F)n1	PRWSIEBRGXYXAJ-UHFFFAOYSA-N	EIF2AK3	Homo sapiens				1								1		1					1		1						8.0	416.18	6.0	1.0	3.0	5.0	4.0	3.19	89.93	PD012674	-
PD012698	ASCOMYCIN	CC[C@@H]1/C=C(\C)C[C@H](C)C[C@H](OC)[C@H]2O[C@@](O)(C(=O)C(=O)N3CCCC[C@H]3C(=O)O[C@H](/C(C)=C/[C@@H]3CC[C@@H](O)[C@H](OC)C3)[C@H](C)[C@@H](O)CC1=O)[C@H](C)C[C@@H]2OC	ZDQSOHOQTUFQEM-NURRSENYSA-N	FKBP1A	Homo sapiens									1							1			1								4.0	791.48	12.0	3.0	6.0	4.0	0.0	4.47	178.36	PD065447	-
PD012748	TALNETANT	CC[C@H](NC(=O)c1c(O)c(-c2ccccc2)nc2ccccc12)c1ccccc1	BIAVGWDGIJKWRM-FQEVSTJZSA-N	TACR3	Homo sapiens				1								1	1						1		1						9.0	382.17	3.0	2.0	5.0	4.0	4.0	5.49	62.22	PD067420	-
PD012759	SR3335	O=S(=O)(Nc1ccc(C(O)(C(F)(F)F)C(F)(F)F)cc1)c1cccs1	LZWUNZRMANFRAO-UHFFFAOYSA-N	RORA	Homo sapiens					1													1									1.0	404.99	4.0	2.0	4.0	2.0	2.0	3.86	66.4	PD012759	-
PD012760	PF-04457845	O=C(Nc1cccnn1)N1CCC(=Cc2cccc(Oc3ccc(C(F)(F)F)cn3)c2)CC1	BATCTBJIJJEPHM-UHFFFAOYSA-N	FAAH	Homo sapiens		1		1			1											1					1				6.0	455.16	5.0	1.0	4.0	4.0	3.0	5.39	80.24	PD012760	-
PD012775	ONX-0914	COc1ccc(C[C@H](NC(=O)[C@H](C)NC(=O)CN2CCOCC2)C(=O)N[C@@H](Cc2ccccc2)C(=O)[C@@]2(C)CO2)cc1	WQAVPPWWLLVGFK-VTNASVEKSA-N	PSMB8	Homo sapiens									1			1				1			1								6.0	580.29	8.0	3.0	14.0	4.0	2.0	0.64	138.6	PD086808	-
PD012797	torin 1	CCC(=O)N1CCN(c2ccc(-n3c(=O)ccc4cnc5ccc(-c6cnc7ccccc7c6)cc5c43)cc2C(F)(F)F)CC1	AKCRNFFTGXBONI-UHFFFAOYSA-N	MTOR	Homo sapiens			1	1					1				1					1	1								13.0	607.22	6.0	0.0	4.0	7.0	6.0	6.83	71.33	PD012797	-
PD012803	brigatinib	COc1cc(N2CCC(N3CCN(C)CC3)CC2)ccc1Nc1ncc(Cl)c(Nc2ccccc2P(C)(C)=O)n1	AILRADAXUVEEIR-UHFFFAOYSA-N	ALK	Homo sapiens		1																1		1							10.0	583.26	9.0	2.0	8.0	5.0	3.0	5.09	85.86	PD012803	-
PD012806	BLU9931	C=CC(=O)Nc1cccc(C)c1Nc1ncc2cc(-c3c(Cl)c(OC)cc(OC)c3Cl)ccc2n1	TXEBNKKOLVBTFK-UHFFFAOYSA-N	FGFR4	Homo sapiens		1		1									1			1		1			1		1				10.0	508.11	6.0	2.0	7.0	4.0	4.0	6.8	85.37	PD012806	-
PD012831	SP2509	C/C(=N\NC(=O)c1cccc(S(=O)(=O)N2CCOCC2)c1)c1cc(Cl)ccc1O	NKUDGJUBIVEDTF-FYJGNVAPSA-N	KDM1A	Homo sapiens									1							1			1								4.0	437.08	6.0	2.0	5.0	3.0	2.0	2.22	108.3	PD121320	-
PD012847	A-1210477	Cc1nn(C)c(COc2ccc(N3CCN(S(=O)(=O)N(C)C)CC3)cc2)c1-c1cccc2c(CCCOc3cccc4ccccc34)c(C(=O)O)n(CCN3CCOCC3)c12	XMVAWGSQPHFXKU-UHFFFAOYSA-N	MCL1	Homo sapiens		1														1		1								1	1.0	849.39	11.0	1.0	16.0	8.0	6.0	6.05	134.84	PD012847	-
PD012856	RO-5045337	CCOc1cc(C(C)(C)C)ccc1C1=N[C@@](C)(c2ccc(Cl)cc2)[C@@](C)(c2ccc(Cl)cc2)N1C(=O)N1CCN(CCCS(C)(=O)=O)CC1	QBGKPEROWUKSBK-QPPIDDCLSA-N	MDM2	Homo sapiens		1		1														1									1.0	726.28	6.0	0.0	9.0	5.0	3.0	7.75	82.52	PD062244	-
PD012857	TRAM-34	Clc1ccccc1C(c1ccccc1)(c1ccccc1)n1cccn1	KBFUQFVFYYBHBT-UHFFFAOYSA-N	KCNN4	Homo sapiens				1					1			1	1			1			1		1						2.0	344.11	2.0	0.0	4.0	4.0	4.0	5.38	17.82	PD012857	-
PD012859	GNF5837	Cc1ccc(NC(=O)Nc2cc(C(F)(F)F)ccc2F)cc1Nc1ccc2c(c1)NC(=O)/C2=C\c1ccc[nH]1	YYDUWLSETXNJJT-MTJSOVHGSA-N	NTRK1;NTRK2;NTRK3	Homo sapiens		1											1			1		1									26.0	535.16	3.0	5.0	5.0	5.0	4.0	7.36	98.05	PD015655	-
PD012860	HG-10-102-01	CNc1nc(Nc2ccc(C(=O)N3CCOCC3)cc2OC)ncc1Cl	YEVOZZZLKJKCCD-UHFFFAOYSA-N	LRRK2	Homo sapiens			1	1										1				1			1						4.0	377.13	7.0	2.0	5.0	3.0	2.0	2.4	88.61	PD012860	-
PD012871	CAPMATINIB	CNC(=O)c1ccc(-c2cnc3ncc(Cc4ccc5ncccc5c4)n3n2)cc1F	LIOLIMKSCNQPLV-UHFFFAOYSA-N	MET	Homo sapiens		1		1					1				1			1		1	1	1							1.0	412.14	6.0	1.0	4.0	5.0	5.0	3.43	85.07	PD012871	-
PD012875	bardoxolone methyl	COC(=O)[C@]12CCC(C)(C)C[C@H]1[C@H]1C(=O)C=C3[C@@](C)(CC[C@H]4C(C)(C)C(=O)C(C#N)=C[C@]34C)[C@]1(C)CC2	WPTTVJLTNAWYAO-KPOXMGGZSA-N	NFE2L2	Homo sapiens									1				1			1			1								8.0	505.32	5.0	0.0	1.0	5.0	0.0	6.38	84.23	PD056812	-
PD012892	GSK-J1	O=C(O)CCNc1cc(N2CCc3ccccc3CC2)nc(-c2ccccn2)n1	AVZCPICCWKMZDT-UHFFFAOYSA-N	KDM6B;KDM6A;KDM5B	Homo sapiens											1							1								1	9.0	389.19	6.0	2.0	6.0	4.0	3.0	3.03	91.24	PD012892	-
PD012923	WAY-252623	Fc1ccc(-c2c3cccc(C(F)(F)F)c3nn2Cc2ccc(F)cc2Cl)cc1	KYWWJENKIMRJBI-UHFFFAOYSA-N	NR1H2,NR1H3;NR1H2;NR1H3	Homo sapiens		1														1		1									5.0	422.06	2.0	0.0	3.0	4.0	4.0	6.7	17.82	PD012923	-
PD012925	niraparib	NC(=O)c1cccc2cn(-c3ccc([C@@H]4CCCNC4)cc3)nc12	PCHKPVIQAHNQLW-CQSZACIVSA-N	PARP1;PARP2	Homo sapiens		1		1								1						1	1	1	1						11.0	320.16	4.0	2.0	3.0	4.0	3.0	2.59	72.94	PD065106	-
PD012943	FASIGLIFAM	Cc1cc(OCCCS(C)(=O)=O)cc(C)c1-c1cccc(COc2ccc3c(c2)OC[C@H]3CC(=O)O)c1	BZCALJIHZVNMGJ-HSZRJFAPSA-N	FFAR1	Homo sapiens		1		1									1			1		1			1			1			5.0	524.19	6.0	1.0	11.0	4.0	3.0	5.31	99.13	PD056000	-
PD012948	MK-2894	Cc1sc(C)c(C(=O)NC2(c3ccc(C(=O)O)cc3)CC2)c1Cc1ccc(C(F)(F)F)cc1	QJZQFVRFJCGDKF-UHFFFAOYSA-N	PTGER4	Homo sapiens												1							1		1						3.0	473.13	3.0	2.0	6.0	4.0	3.0	6.09	66.4	PD012948	-
PD012952	Akt inhibitor VIII	O=c1[nH]c2ccccc2n1C1CCN(Cc2ccc(-c3nc4cc5[nH]cnc5cc4nc3-c3ccccc3)cc2)CC1	BIWGYFZAEWGBAL-UHFFFAOYSA-N	AKT1	Homo sapiens									1										1		1						4.0	551.24	6.0	2.0	5.0	8.0	7.0	6.32	95.49	PD012952	-
PD012958	CL-387785 (EKI-785)	CC#CC(=O)Nc1ccc2ncnc(Nc3cccc(Br)c3)c2c1	BTYYWOYVBXILOJ-UHFFFAOYSA-N	EGFR	Homo sapiens									1										1		1		1				6.0	380.03	4.0	2.0	3.0	3.0	3.0	4.1	66.91	PD012958	-
PD012960	FALNIDAMOL	CN1CCC(Nc2ncc3ncnc(Nc4ccc(F)c(Cl)c4)c3n2)CC1	FTFRZXFNZVCRSK-UHFFFAOYSA-N	EGFR	Homo sapiens									1								1		1							1	4.0	387.14	7.0	2.0	4.0	4.0	3.0	3.46	78.86	PD012960	-
PD012990	MK-3697	COc1ccc(CNC(=O)c2cc(-c3cncc(C)c3)ncc2-c2nccs2)nc1OC	VSOUDUXMPUHJEU-UHFFFAOYSA-N	HCRTR2	Homo sapiens												1							1		1						3.0	447.14	8.0	1.0	7.0	4.0	4.0	3.92	99.12	PD012990	-
PD012994	DEFACTINIB	CNC(=O)c1ccc(Nc2ncc(C(F)(F)F)c(NCc3nccnc3N(C)S(C)(=O)=O)n2)cc1	FWLMVFUGMHIOAA-UHFFFAOYSA-N	PTK2;PTK2B	Homo sapiens				1			1											1			1						14.0	510.14	9.0	3.0	8.0	3.0	3.0	2.4	142.1	PD012994	-
PD013000	PI-3065	Fc1ccc2[nH]ccc2c1-c1nc(N2CCOCC2)c2sc(CN3CCN(CC4CC4)CC3)cc2n1	YDNOHCOYQVZOMC-UHFFFAOYSA-N	PIK3CD	Homo sapiens		1																1									4.0	506.23	7.0	1.0	6.0	7.0	4.0	4.34	60.52	PD013000	-
PD013049	PAP-1	O=c1ccc2c(OCCCCOc3ccccc3)c3ccoc3cc2o1	KINMYBBFQRSVLL-UHFFFAOYSA-N	KCNA3	Homo sapiens				1					1							1			1		1						12.0	350.12	5.0	0.0	7.0	4.0	4.0	4.78	61.81	PD013049	-
PD013051	EPZ011989	CCN(c1cc(C#CCN2CCOCC2)cc(C(=O)NCc2c(C)cc(C)[nH]c2=O)c1C)C1CCC(N(C)CCOC)CC1	XQFINGFCBFHOPE-UHFFFAOYSA-N	EZH1;EZH2	Homo sapiens		1		1								1						1	1								1.0	605.39	7.0	2.0	11.0	4.0	2.0	3.63	90.14	PD013051	-
PD013054	PD013054	CCc1c2c(nc3ccc(OC(=O)N4CCN(C(=O)c5ccc(COC(=O)N[C@@H](CCC(=O)N6CCN(c7cccc(NC8=NCCCN8)c7)CC6)C(=O)O)cc5)CC4)cc13)-c1cc3c(c(=O)n1C2)COC(=O)[C@]3(O)CC	YEGQGRLKVPOBBE-WCAAHISOSA-N	ITGB5	Homo sapiens									1										1								2.0	1052.44	17.0	5.0	13.0	10.0	5.0	4.17	266.87	PD084569	-
PD013056	P505-15	NC(=O)c1cnc(N[C@@H]2CCCC[C@@H]2N)nc1Nc1cccc(-n2nccn2)c1	TXGKRVFSSHPBAJ-JKSUJKDBSA-N	SYK	Homo sapiens		1		1								1			1	1		1	1		1						13.0	393.2	9.0	4.0	6.0	4.0	3.0	1.58	149.66	PD023177	-
PD013060	CS-5006	CNCCN(C)Cc1cn[nH]c1-c1ccc(OC2CC(OCCC3CCOCC3)C2)cc1	QMDKVNSQXPVCRD-UHFFFAOYSA-N	PRMT6	Homo sapiens		1										1						1	1								1.0	442.29	6.0	2.0	12.0	4.0	2.0	3.47	71.64	PD013060	-
PD013106	ATORVASTATIN	CC(C)c1c(C(=O)Nc2ccccc2)c(-c2ccccc2)c(-c2ccc(F)cc2)n1CC[C@@H](O)C[C@@H](O)CC(=O)O	XUKUURHRXDUEBC-KAYWLYCHSA-N	HMGCR	Homo sapiens				1					1				1			1			1	1	1						13.0	558.25	5.0	4.0	12.0	4.0	4.0	6.31	111.79	PD075665	-
PD013129	DINOPROST	CCCCC[C@H](O)/C=C/[C@H]1[C@H](O)C[C@H](O)[C@@H]1C/C=C\CCCC(=O)O	PXGPLTODNUVGFL-YNNPMVKQSA-N	PTGFR	Homo sapiens												1	1			1			1	1							15.0	354.24	4.0	4.0	12.0	1.0	0.0	3.04	97.99	PD072736	-
PD013365	SAR405	C[C@@H]1COCCN1c1cc(=O)n2c(n1)N(Cc1cncc(Cl)c1)[C@H](C(F)(F)F)CC2	SPDQRCUBFSRAFI-DOMZBBRYSA-N	PIK3C3	Homo sapiens				1		1									1	1		1			1						1.0	443.13	7.0	0.0	3.0	4.0	2.0	2.86	63.49	PD033157	-
PD013366	PD013366	CC(C)C(CCC(C)C1CCC2C3C(O)CC4CC(NCCCNCCCCNCCCN)CCC4(C)C3CCC12C)OS(=O)(=O)O	WUJVPODXELZABP-UHFFFAOYSA-N	PTPN1	Homo sapiens						1												1									0.0	684.52	8.0	6.0	20.0	4.0	0.0	5.53	145.94	PD013366	-
PD013367	LTV-1	Cc1ccccc1N1C(=O)C(=Cc2ccc(OCc3cccc(C(=O)O)c3)cc2)C(=O)NC1=S	DSYDHTCEVHUCPE-UHFFFAOYSA-N		-						1												1									0.0	472.11	5.0	2.0	6.0	4.0	3.0	4.1	95.94	PD013367	-
PD013368	HLY78	CCc1cccc2c1N(C)Cc1cc3c(cc1-2)OCO3	FAZZYPIBZBGQSH-UHFFFAOYSA-N	AXIN1;AXIN2	Homo sapiens						1										1		1									1.0	267.13	3.0	0.0	1.0	4.0	2.0	3.59	21.7	PD013368	-
PD013369	JCP174	CCCOc1oc(=O)c2cc(N)ccc2c1Cl	MDOWUFTZOHGGHU-UHFFFAOYSA-N		-						1												1									0.0	253.05	4.0	1.0	3.0	2.0	2.0	2.82	65.46	PD013369	-
PD013370	BTdCPU	O=C(Nc1ccc(Cl)c(Cl)c1)Nc1ccc2nnsc2c1	NUUSUAWULNXMGF-UHFFFAOYSA-N	EIF2AK1	Homo sapiens						1										1		1									0.0	337.98	4.0	2.0	2.0	3.0	3.0	4.64	66.91	PD013370	-
PD013371	TC-S 7009	O=[N+]([O-])c1c(Nc2cc(F)cc(Cl)c2)ccc2nonc12	CDQUJZKBRAFWNG-UHFFFAOYSA-N	EPAS1	Homo sapiens						1										1		1									2.0	308.01	6.0	1.0	3.0	3.0	3.0	3.67	94.09	PD013371	-
PD013372	PD013372	CC[C@@H](N[C@@H](C)CC(N)=O)c1ccc(Cl)c(Oc2ccccc2)c1F	DXPCUPMRYIXTFI-BLLLJJGKSA-N		-						1												1									0.0	364.14	3.0	2.0	8.0	2.0	2.0	4.58	64.35	PD033163	-
PD013373	WWL 113	CCOC(=O)c1ccc(-c2ccc(OC(=O)N(C)Cc3cccc(-c4ccncc4)c3)cc2)cc1	AKIIPHDGVCFVCC-UHFFFAOYSA-N		-						1												1									0.0	466.19	5.0	0.0	7.0	4.0	4.0	6.22	68.73	PD013373	-
PD013374	WWL229	COCCCC1CCCCN1C(=O)Oc1ccc([N+](=O)[O-])cc1	XVBRVSAGMWRVCK-UHFFFAOYSA-N		-						1												1									0.0	322.15	5.0	0.0	6.0	2.0	1.0	3.37	81.91	PD013374	-
PD013375	AU1235	O/C(=N\c1ccc(F)c(F)c1F)NC1C2CC3CC(C2)CC1C3	FRRHMLGKNPFRKT-UHFFFAOYSA-N	EPHX2	Homo sapiens						1												1									1.0	324.14	1.0	2.0	2.0	5.0	1.0	4.06	44.62	PD013375	-
PD013376	TX2-121-1	C=CC(=O)Nc1cc(-c2nn(C3CCN(CCNC(=O)[C@H](C)CCC45CC6CC(CC(C6)C4)C5)CC3)c3ncnc(N)c23)ccc1Oc1ccccc1	GKJWHLDKQULMHJ-PZMWFESPSA-N	ERBB3	Homo sapiens						1												1									1.0	716.42	9.0	3.0	13.0	9.0	4.0	7.38	140.29	PD022180	-
PD013377	PD013377	COc1cc(Cc2nc3c(N)nc(F)nc3n2CCOC(C)C)cc(OC)c1OC	BYANVKBPICPBQN-UHFFFAOYSA-N		-						1												1									0.0	419.2	9.0	1.0	9.0	3.0	3.0	2.59	106.54	PD013377	-
PD013378	Arylquin 1	CN(C)c1ccc2cc(-c3ccccc3F)c(N)nc2c1	RHAQINSYYSNKKI-UHFFFAOYSA-N		-						1												1									0.0	281.13	3.0	1.0	2.0	3.0	3.0	3.69	42.15	PD013378	-
PD013379	Theonellamide F (TNM-F)	CC(/C=C/c1ccc(Br)cc1)=C\[C@H](O)[C@@H]1CC(=O)N[C@@H](CO)C(=O)N[C@@H]2Cn3cnc(c3)C[C@H](NC(=O)C[C@H](O)C[C@@H](C(=O)O)NC(=O)CCNC(=O)[C@H](Cc3ccc(Br)cc3)NC(=O)[C@H]([C@@H](O)C(N)=O)NC(=O)[C@H](CC(N)=O)NC2=O)C(=O)N[C@@H]([C@H](C)O)C(=O)N[C@@H](CO)C(=O)N[C@@H](Cc2ccccc2)C(=O)N1	DAIPMSNAEZFUGV-BIWASUEOSA-N		-						1												1									0.0	1648.45	23.0	21.0	16.0	6.0	4.0	-6.97	611.88	PD033170	-
PD013380	GTPL8287	O=C(NC[C@H](O)CN1CCc2ccccc2C1)c1cc(NC2COC2)ncn1	ZKXZLIFRWWKZRY-KRWDZBQOSA-N	PRMT5	Homo sapiens		1		1		1						1				1		1	1								2.0	383.2	7.0	3.0	7.0	4.0	2.0	0.44	99.61	PD013061	-
PD013382	PD013382	O=C(O)CCCCCN1C(=O)c2cccc3c(N4CCCCC4)ccc(c23)C1=O	MBIOYMJZOCQPAE-UHFFFAOYSA-N		-						1												1									0.0	394.19	4.0	1.0	7.0	4.0	2.0	4.07	77.92	PD013382	-
PD013383	EPZ005687	Cc1cc(C)c(CNC(=O)c2cc(-c3ccc(CN4CCOCC4)cc3)cc3c2cnn3C2CCCC2)c(=O)[nH]1	ZOIBZSZLMJDVDQ-UHFFFAOYSA-N	EZH2	Homo sapiens						1												1									1.0	539.29	6.0	2.0	7.0	6.0	4.0	4.89	92.25	PD013383	-
PD013385	GSK2194069	O=C(C1CC1)N1CC[C@@H](Cc2n[nH]c(=O)n2-c2ccc(-c3ccc4occc4c3)cc2)C1	AQTPWCUIYUOEMG-INIZCTEOSA-N	FASN	Homo sapiens		1				1										1		1									1.0	428.18	5.0	1.0	5.0	6.0	4.0	3.77	84.13	PD026484	-
PD013386	RU-SKI 43	CCC(C)CNCC(=O)N1CCc2sccc2C1COc1cccc(C)c1	AEENEMOEBJOKGN-UHFFFAOYSA-N	HHAT	Homo sapiens						1												1								1	2.0	386.2	4.0	1.0	8.0	3.0	2.0	4.2	41.57	PD013386	-
PD013387	SMI-481	O=C(c1ccc(Cl)c([N+](=O)[O-])c1)N1CCN(c2ccccc2F)CC1	LSPJXCGEFJDMHA-UHFFFAOYSA-N		-						1												1									0.0	363.08	4.0	0.0	3.0	3.0	2.0	3.35	66.69	PD013387	-
PD013388	AA74-1	CC(C)CC(O)(CC(C)C)c1cnn(C(=O)N2CCCC2)n1	GXBVPGCIMCIASQ-UHFFFAOYSA-N		-						1												1									0.0	308.22	5.0	1.0	5.0	2.0	1.0	2.62	71.25	PD013388	-
PD013389	KT109	O=C(N1CCCCC1Cc1ccccc1)n1cc(-c2ccc(-c3ccccc3)cc2)nn1	JKJMWHULJIOKPJ-UHFFFAOYSA-N	ABHD6;DAGLB	Homo sapiens						1							1					1					1				3.0	422.21	4.0	0.0	4.0	5.0	4.0	5.68	51.02	PD013389	-
PD013390	CCT251545	Cn1cc(-c2ccc(-c3cncc(Cl)c3N3CCC4(CCNC4=O)CC3)cc2)cn1	LBFYQISQYCGDDW-UHFFFAOYSA-N	CDK19;CDK8;CDK19,CDK8;WNT3A	Homo sapiens		1		1		1						1		1		1		1	1								8.0	421.17	5.0	1.0	3.0	5.0	3.0	3.91	63.05	PD013390	-
PD013391	PD013391	C=CC(=O)NC[C@H](NC(=O)CCCC(=O)NCCCOCCOCCOCCCNC(=O)CCCC[C@@H]1SC[C@@H]2NC(=O)N[C@H]12)C(=O)N1C[C@H](Oc2nccc3cc(OC)ccc23)C[C@H]1C(=O)N[C@]1(C(=O)NS(=O)(=O)C2CC2)C[C@H]1C=C	VQWLMSNPXUUDCO-MEBCHQOKSA-N		-						1												1									0.0	1182.51	17.0	8.0	37.0	7.0	2.0	1.01	329.22	PD033177	-
PD013392	WEHI539	NCc1ccc(OCCCc2sc(-c3ccc4c(c3)/C(=N/Nc3nc5ccccc5s3)CCC4)nc2C(=O)O)cc1	JKMWZKPAXZBYEH-JWHWKPFMSA-N	BCL2L1	Homo sapiens		1		1		1												1									2.0	583.17	9.0	3.0	10.0	6.0	5.0	6.74	122.72	PD033178	-
PD013393	PD013393	COC(=O)c1c(NC(=O)c2c(F)c(F)c(F)c(F)c2F)sc2c1CCCCC2	AVRWEULSKHQETA-UHFFFAOYSA-N		-						1												1									0.0	419.06	4.0	1.0	3.0	3.0	2.0	4.75	55.4	PD013393	-
PD013394	Galvestine-1	C[C@@H](COC(=O)N1CCC(n2c(=O)[nH]c3ccccc32)CC1)N(Cc1ccccc1)Cc1ccccc1	ZZCOBRRMCZXMNJ-QHCPKHFHSA-N		-						1												1									0.0	498.26	5.0	1.0	8.0	5.0	4.0	5.19	70.57	PD033180	-
PD013395	PD013395	O=c1c(Cl)c(Cl)cnn1Cc1ccccc1Cl	OCSOJUHXYHYEKJ-UHFFFAOYSA-N		-						1												1									12.0	287.96	3.0	0.0	2.0	2.0	2.0	3.25	34.89	PD013395	-
PD013396	AA92593	COc1ccc(S(=O)(=O)N2CCCCC2)cc1C	HDTKLZINZGEPFG-UHFFFAOYSA-N	OPN4	Homo sapiens						1										1		1									0.0	269.11	3.0	0.0	3.0	2.0	1.0	2.18	46.61	PD013396	-
PD013397	PD013397	CC(=O)NCCCCCNc1cc(-c2ccccn2)nc(NC[C@H]2CC[C@H](CNS(=O)(=O)c3cccc(C#N)c3)CC2)n1	TXOCRJRPKJSQMA-SOAUALDESA-N		-						1												1									0.0	604.29	9.0	4.0	15.0	4.0	3.0	4.33	161.79	PD033184	-
PD013398	NMS-859	O=C(CCl)Nc1cccc(NC2=NS(=O)(=O)c3ccccc32)c1	JWMFLBAPPIWNGG-UHFFFAOYSA-N	VCP	Homo sapiens						1												1									1.0	349.03	4.0	2.0	3.0	3.0	2.0	2.42	87.63	PD013398	-
PD013399	18A	O=C(N/N=C/c1ccc(O)cc1)Nc1cccc2nsnc12	QRTYYEYYXURINZ-OVCLIPMQSA-N		-						1												1									5.0	313.06	6.0	3.0	3.0	3.0	3.0	2.55	99.5	PD033186	-
PD013400	PD013400	O=C(O)Cn1c(C(=O)O)cc2ccc3ccccc3c21	AKGLRHRNGGDMDM-UHFFFAOYSA-N		-						1												1									1.0	269.07	3.0	2.0	3.0	3.0	3.0	2.58	79.53	PD013400	-
PD013401	Branaplam	CC1(C)CC(Oc2ccc(-c3ccc(-c4cn[nH]c4)cc3O)nn2)CC(C)(C)N1	STWTUEAWRAIWJG-UHFFFAOYSA-N		-						1										1		1									2.0	393.22	6.0	3.0	4.0	4.0	3.0	3.93	95.95	PD013401	-
PD013933	Dexverapamil	COc1ccc(CCN(C)CCC[C@](C#N)(c2ccc(OC)c(OC)c2)C(C)C)cc1OC	SGTNSNPWRIOYBX-HHHXNRCGSA-N	ABCC1	Homo sapiens												1							1		1						7.0	454.28	6.0	0.0	13.0	2.0	2.0	5.09	63.95	PD009864	-
PD014247	HYDROXYFLUTAMIDE	CC(C)(O)C(=O)Nc1ccc([N+](=O)[O-])c(C(F)(F)F)c1	YPQLFJODEKMJEF-UHFFFAOYSA-N	AR	Homo sapiens									1				1						1								4.0	292.07	4.0	2.0	3.0	1.0	1.0	2.32	92.47	PD014247	-
PD014574	PAMOIC ACID	O=C(O)c1cc2ccccc2c(Cc2c(O)c(C(=O)O)cc3ccccc23)c1O	WLJNZVDCPSBLRP-UHFFFAOYSA-N	GPR35	Homo sapiens				1								1				1			1		1					1	5.0	388.09	4.0	4.0	4.0	4.0	4.0	4.39	115.06	PD014574	-
PD014740	TIOTIDINE	CN/C(=N\C#N)NCCSCc1csc(N=C(N)N)n1	YDDXVAXDYKBWDX-UHFFFAOYSA-N	HRH2	Homo sapiens				1								1	1			1			1		1			1			5.0	312.09	6.0	4.0	6.0	1.0	1.0	-0.07	137.5	PD014740	-
PD014807	MINODRONIC ACID	O=P(O)(O)C(O)(Cc1cnc2ccccn12)P(=O)(O)O	VMMKGHQPQIEGSQ-UHFFFAOYSA-N	FDPS	Homo sapiens									1										1	1							4.0	322.01	5.0	5.0	4.0	2.0	2.0	-0.12	152.59	PD014807	-
PD014867	ROTTLERIN	CC(=O)c1c(O)c(C)c(O)c(Cc2c(O)c3c(c(C(=O)/C=C/c4ccccc4)c2O)OC(C)(C)C=C3)c1O	DEZFNHCVIZBHBI-ZHACJKMWSA-N		-					1												1	1								1	25.0	516.18	8.0	5.0	6.0	4.0	3.0	5.4	144.52	PD071974	-
PD015036	SC-560	COc1ccc(-n2nc(C(F)(F)F)cc2-c2ccc(Cl)cc2)cc1	PQUGCKBLVKJMNT-UHFFFAOYSA-N	PTGS1	Homo sapiens				1								1	1			1			1		1						14.0	352.06	3.0	0.0	3.0	3.0	3.0	5.22	27.05	PD015036	-
PD015059	2-METHOXYESTRADIOL	COc1cc2c(cc1O)CC[C@@H]1[C@@H]2CC[C@]2(C)[C@@H](O)CC[C@@H]12	CQOQDQWUFQDJMK-SSTWWWIQSA-N	SHBG	Homo sapiens									1										1								16.0	302.19	3.0	2.0	1.0	4.0	1.0	3.62	49.69	PD055992	-
PD015179	GW 7647	CC(C)(Sc1ccc(CCN(CCCCC2CCCCC2)C(=O)NC2CCCCC2)cc1)C(=O)O	PKNYXWMTHFMHKD-UHFFFAOYSA-N	PPARA	Homo sapiens				1								1	1						1		1						37.0	502.32	3.0	2.0	12.0	3.0	1.0	7.28	69.64	PD015179	-
PD015190	GW1929	CN(CCOc1ccc(C[C@H](Nc2ccccc2C(=O)c2ccccc2)C(=O)O)cc1)c1ccccn1	QTQMRBZOBKYXCG-MHZLTWQESA-N	PPARG	Homo sapiens				1								1	1						1		1					1	32.0	495.22	6.0	2.0	12.0	4.0	4.0	4.94	91.76	PD062793	-
PD015426	CHEMBL35571	C#Cc1ccc2c(c1)C(=O)N(C)Cc1c(C(=O)OCCCOC(=O)c3ncn4c3CN(C)C(=O)c3cc(C#C)ccc3-4)ncn1-2	JYRRJDFICVOODX-UHFFFAOYSA-N	GABRA5	Homo sapiens												1							1								4.0	602.19	10.0	0.0	6.0	6.0	4.0	2.6	128.86	PD015426	-
PD015485	L-732,138	CC(=O)N[C@@H](Cc1c[nH]c2ccccc12)C(=O)OCc1cc(C(F)(F)F)cc(C(F)(F)F)c1	BYYQYXVAWXAYQC-IBGZPJMESA-N	TACR1	Homo sapiens				1								1				1			1		1						26.0	472.12	3.0	2.0	6.0	3.0	3.0	5.0	71.19	PD073300	-
PD015501	STO 609	O=C(O)c1ccc2c3c1cccc3c(=O)n1c3ccccc3nc21	MYKOWOGZBMOVBJ-UHFFFAOYSA-N	CAMKK1;CAMKK2	Homo sapiens		1										1			1	1		1	1								18.0	314.07	4.0	1.0	1.0	5.0	5.0	3.29	71.67	PD015501	-
PD015540	AL-43	C=CCC1Oc2cccc(OC)c2-c2ccc3c(c21)C(C)=CC(C)(C)N3	CZSDJYXNNJQXBB-UHFFFAOYSA-N	NR3C1	Homo sapiens				1					1							1			1		1						3.0	347.19	3.0	1.0	3.0	4.0	2.0	5.98	30.49	PD015540	-
PD015555	GW5638	CC/C(=C(\c1ccccc1)c1ccc(/C=C/C(=O)O)cc1)c1ccccc1	HJQQVNIORAQATK-DDJBQNAASA-N	ESR2	Homo sapiens									1										1								3.0	354.16	1.0	1.0	6.0	3.0	3.0	6.15	37.3	PD034920	-
PD015563	GW-3965	O=C(O)Cc1cccc(OCCCN(Cc2cccc(C(F)(F)F)c2Cl)CC(c2ccccc2)c2ccccc2)c1	NAXSRXHZFIBFMI-UHFFFAOYSA-N	NR1H2,NR1H3;NR1H2;NR1H3	Homo sapiens		1		1												1		1			1						12.0	581.19	3.0	1.0	13.0	4.0	4.0	8.09	49.77	PD015563	-
PD015596	LG190178	CCC(CC)(c1ccc(OCC(O)CO)c(C)c1)c1ccc(OCC(O)C(C)(C)C)c(C)c1	AIKLCYAFOOBGEV-UHFFFAOYSA-N	VDR	Homo sapiens									1										1								2.0	458.3	5.0	3.0	11.0	2.0	2.0	4.93	79.15	PD015596	-
PD015658	AK173721	COc1ccc2c(c1)[C@]1(C[C@H]1c1ccc3c(/C=C/c4ccc(CN5C[C@H](C)O[C@H](C)C5)cc4)n[nH]c3c1)C(=O)N2	DADASRPKWOGKCU-FVTQAUBDSA-N	PLK4	Homo sapiens		1										1			1			1	1								11.0	534.26	5.0	2.0	6.0	7.0	4.0	5.73	79.48	PD024394	-
PD015659	CCT241533	COc1cc2nc(-c3cc(F)ccc3O)nc(N[C@@H]3CNC[C@H]3C(C)(C)O)c2cc1OC	HZASIAXCPXTISQ-NVXWUHKLSA-N	CHEK2	Homo sapiens									1					1	1	1			1								4.0	442.2	8.0	4.0	6.0	4.0	3.0	2.93	108.76	PD034530	-
PD015662	SEW 2871	FC(F)(F)c1cccc(-c2noc(-c3cc(-c4ccccc4)c(C(F)(F)F)s3)n2)c1	OYMNPJXKQVTQTR-UHFFFAOYSA-N	S1PR1	Homo sapiens				1								1	1			1			1		1						3.0	440.04	4.0	0.0	3.0	4.0	4.0	7.17	38.92	PD015662	-
PD015666	MEK inhibitor I	N#C/C(=C(/N)Sc1ccccc1N)c1cccc(C(O)c2ccncc2)c1	NHBMKTBZZSJUGA-HEHNFIMWSA-N	MAP2K1	Homo sapiens									1										1								3.0	374.12	6.0	3.0	5.0	3.0	3.0	3.69	108.95	PD024161	-
PD015669	681640	O=C1NC(=O)c2c1c(-c1ccccc1Cl)cc1[nH]c3ccc(O)cc3c21	DPEXRCOBPACFOO-UHFFFAOYSA-N	WEE1	Homo sapiens									1										1								45.0	362.05	3.0	3.0	1.0	5.0	4.0	4.23	82.19	PD015669	-
PD015737	CYCLOPAMINE	CC1=C2C[C@H]3[C@@H](CC=C4C[C@@H](O)CC[C@@]43C)[C@@H]2CC[C@]12O[C@@H]1C[C@H](C)CN[C@H]1[C@H]2C	QASFUMOKHFSJGL-LAFRSMQTSA-N	SMO	Homo sapiens				1								1	1			1			1		1						3.0	411.31	3.0	2.0	0.0	6.0	0.0	5.0	41.49	PD045923	-
PD015762	PD 174265	CCC(=O)Nc1ccc2ncnc(Nc3cccc(Br)c3)c2c1	WUPUZEMRHDROEO-UHFFFAOYSA-N	EGFR	Homo sapiens									1										1								3.0	370.04	4.0	2.0	4.0	3.0	3.0	4.48	66.91	PD015762	-
PD015795	ML408	Cn1c(NC(=O)c2ccccc2)nc2c3cnccc3ccc21	ZQBUFRBMMIFWOT-UHFFFAOYSA-N		-					1													1									0.0	302.12	4.0	1.0	2.0	4.0	4.0	3.37	59.81	PD015795	-
PD015796	ML407	Cc1ccc(C(C)C)c(OCCn2c(=S)[nH]c3ccccc32)c1	FEHKMRKXIVBAPE-UHFFFAOYSA-N		-					1													1									0.0	326.15	3.0	1.0	5.0	3.0	3.0	5.21	29.95	PD015796	-
PD015797	ML406	CC(=O)c1ccc(N2CCN(C(=O)c3ccc4c(c3)OCO4)CC2)cc1	DMJGPASMZSNEAZ-UHFFFAOYSA-N		-					1													1									2.0	352.14	5.0	0.0	3.0	4.0	2.0	2.58	59.08	PD015797	-
PD015798	ML404	Cc1ccc(Cl)cc1NC(=O)c1cc(-c2cccc(O)c2)on1	IGFGYIMMNXHPFY-UHFFFAOYSA-N		-					1													1									0.0	328.06	4.0	2.0	3.0	3.0	3.0	4.26	75.36	PD015798	-
PD015799	ML401	O=C(/C=C/c1ccc(Br)cc1)N1CCN(Cc2ccc(Cl)cc2)CC1	NXTNVQJKGHAGAX-BJMVGYQFSA-N	GPR183	Homo sapiens					1													1									1.0	418.04	2.0	0.0	4.0	3.0	2.0	4.46	23.55	PD032470	-
PD015801	ML399	N#Cc1ccc(OCCCN2CCC([C@@](O)(c3cccc(F)c3)c3ccccn3)CC2)cc1	YLADDJNCJBCBJE-HHHXNRCGSA-N	KMT2A,MEN1	Homo sapiens					1											1		1									1.0	445.22	5.0	1.0	8.0	4.0	3.0	4.51	69.38	PD032472	-
PD015802	ML398	Clc1ccc(CN2CCO[C@H](CCc3ccccc3)C2)cc1	CVKXGRRJHJHUFY-LJQANCHMSA-N	DRD4	Homo sapiens					1								1					1									5.0	315.14	2.0	0.0	5.0	3.0	2.0	4.17	12.47	PD024769	-
PD015803	VU0155094	COC(=O)c1ccc(-n2c(C)cc(C(=O)CSc3ccc(NC(C)=O)cc3)c2C)cc1	BCNKQXDDMIBITO-UHFFFAOYSA-N	GRM8;GRM7;GRM4	Homo sapiens					1								1					1									9.0	436.15	6.0	1.0	7.0	3.0	3.0	4.81	77.4	PD015803	-
PD015806	ML390	O=C(CCNC(=O)c1ccc(OC(F)(F)F)cc1)N[C@@H]1CCCc2ccccc21	SGNRHEDBLPGDDC-GOSISDBHSA-N		-					1													1									1.0	406.15	3.0	2.0	6.0	3.0	2.0	3.9	67.43	PD032476	-
PD015807	ML389	O=C(C1CCN(c2ccc(Cl)cn2)CC1)N(CC1CC1)c1ccc(Cl)cc1	KFYLIVATYVZBDM-UHFFFAOYSA-N	AVPR1A	Homo sapiens					1													1									0.0	403.12	3.0	0.0	5.0	4.0	2.0	5.05	36.44	PD015807	-
PD015808	ML388	Cc1ccc(-n2c(C)cc(-c3nnc4n3CCCCC4)c2C)cc1	QKPPIMNVHFZLLI-UHFFFAOYSA-N	HPGD	Homo sapiens					1				1									1	1								2.0	320.2	4.0	0.0	2.0	4.0	3.0	4.39	35.64	PD015808	-
PD015809	ML387	COc1ccc(-n2cnc3cc(C(=O)N4CCCCC4)ccc32)cc1	FUCWZIFGSAFUAO-UHFFFAOYSA-N	HPGD	Homo sapiens					1				1									1	1								2.0	335.16	4.0	0.0	3.0	4.0	3.0	3.66	47.36	PD015809	-
PD015810	ML382	CCOc1ccccc1NC(=O)c1ccccc1NS(=O)(=O)C1CC1	RCSLEKLNDJJJLF-UHFFFAOYSA-N	MRGPRX1	Homo sapiens					1											1		1									0.0	360.11	4.0	2.0	7.0	3.0	2.0	3.24	84.5	PD015810	-
PD015811	ML381	CC(=O)c1cccc(OCc2cc(C(=O)N(C)[C@@H](C)c3ccccn3)no2)c1	JMYDHMCYZKRDPD-AWEZNQCLSA-N	CHRM5	Homo sapiens					1								1					1									5.0	379.15	6.0	0.0	7.0	3.0	3.0	3.68	85.53	PD022142	-
PD015812	ML380	CCN(Cc1ccccc1C(F)(F)F)C(=O)C1CCN(S(=O)(=O)c2ccc3[nH]ncc3c2)CC1	FJPQEOQGIZSLES-UHFFFAOYSA-N	CHRM5	Homo sapiens					1								1					1									3.0	494.16	4.0	1.0	6.0	4.0	3.0	4.03	86.37	PD015812	-
PD015813	ML379	C[C@@H]1CC(=O)NN=C1c1ccc(N2CCOCC2)cc1	AUJRLIIKYCIXHN-LLVKDONJSA-N		-					1													1									0.0	273.15	4.0	1.0	2.0	3.0	1.0	1.38	53.93	PD032481	-
PD015814	ML378	O=C(ON1C(=O)C2CN(C(=O)N3CCOCC3)CCN2C1=O)N1CCC(CCc2ccc(Cl)cc2)CC1	KQQSWNNGVFWIEL-UHFFFAOYSA-N	LYPLA2;LYPLA1	Homo sapiens					1													1									0.0	533.2	6.0	0.0	4.0	5.0	1.0	2.44	102.94	PD015814	-
PD015815	ML377	CCOCCN1Cc2cccc(C(=O)Nc3cccc(-c4nc5ccccc5[nH]4)c3)c2C1=O	GRVJTJHNPYILOR-UHFFFAOYSA-N		-					1													1									0.0	440.18	4.0	2.0	7.0	5.0	4.0	4.47	87.32	PD015815	-
PD015816	ML375	O=C(c1ccc(F)c(F)c1)N1CCN2C(=O)c3ccccc3[C@@]12c1ccc(Cl)cc1	GXBAKXRLQAPKEE-QHCPKHFHSA-N	CHRM5	Homo sapiens					1								1					1									5.0	424.08	2.0	0.0	2.0	5.0	3.0	4.43	40.62	PD025614	-
PD015817	ML372	O=C(O)C1CCN(c2ncc(-c3ccc4c(c3)OCCCO4)s2)CC1	HAVNRFQWAXTDTI-UHFFFAOYSA-N	SMN1	Homo sapiens					1													1									1.0	360.11	6.0	1.0	3.0	4.0	2.0	3.27	71.89	PD015817	-
PD015818	ML370	COc1ccc2cc3c(NC(=O)c4ccco4)nn(C)c3nc2c1	NMSTWHPXQFRZIP-UHFFFAOYSA-N		-					1													1									0.0	322.11	6.0	1.0	3.0	4.0	4.0	2.98	82.18	PD015818	-
PD015819	ML369	Oc1ccc(C2CCN(c3ccnc4ccccc34)CC2)cc1O	DELSIAQBXMLIQV-UHFFFAOYSA-N		-					1													1									0.0	320.15	4.0	2.0	2.0	4.0	3.0	4.03	56.59	PD015819	-
PD015820	ML368	N#Cc1ccc(-c2ccc(NC(=O)Nc3ccc(-c4ccnc5[nH]cnc45)cc3)cc2)cc1	FEDMEJWMCJAMHE-UHFFFAOYSA-N	CYP3A4	Homo sapiens					1													1									2.0	430.15	4.0	3.0	4.0	5.0	5.0	5.81	106.49	PD015820	-
PD015821	ML367	Fc1ccc(Nc2nc(-c3ccncc3)nc3ccccc23)cc1F	LBPYNNJXARHGAG-UHFFFAOYSA-N	ATAD5	Homo sapiens					1													1									3.0	334.1	4.0	1.0	3.0	4.0	4.0	4.71	50.7	PD015821	-
PD015822	ML366	O=C(Nc1nnc(-c2ccc3c(c2)OCCO3)o1)C1CCCCC1	MZDMOTGMRDSIDD-UHFFFAOYSA-N		-					1													1									4.0	329.14	6.0	1.0	3.0	4.0	2.0	3.03	86.48	PD015822	-
PD015823	ML365	COc1ccccc1C(=O)Nc1cccc(NC(=O)c2cccc(C)c2)c1	UTAJHKSGYJSZBR-UHFFFAOYSA-N	KCNK3	Homo sapiens				1	1							1				1		1	1		1						3.0	360.15	3.0	2.0	5.0	3.0	3.0	4.51	67.43	PD015823	-
PD015824	ML360	CCOc1ccc(CCNC(=O)c2ccnn2Cc2cccc(C)c2)cc1OCC	LFMLDXFGTVWZCJ-UHFFFAOYSA-N		-					1													1									0.0	407.22	5.0	1.0	10.0	3.0	3.0	4.01	65.38	PD015824	-
PD015825	ML359	CCOC(=O)C1(CCOc2ccccc2)CCN(Cc2ccc(O)c(Cl)c2)CC1	DCLHRRNJOZJGKD-UHFFFAOYSA-N	P4HB	Homo sapiens					1											1		1									3.0	417.17	5.0	1.0	8.0	3.0	2.0	4.66	59.0	PD015825	-
PD015827	ML356	CCC(CC)C(=O)Nc1nc(-c2ccc(S(=O)(=O)N3CCOCC3)cc2)cs1	YKNITTNJEATJKT-UHFFFAOYSA-N	FASN	Homo sapiens					1													1									0.0	423.13	6.0	1.0	7.0	3.0	2.0	3.21	88.6	PD015827	-
PD015828	ML355	COc1cccc(CNc2ccc(S(=O)(=O)Nc3nc4ccccc4s3)cc2)c1O	OWHBVKBNNRYMIN-UHFFFAOYSA-N	ALOX12	Homo sapiens					1								1					1									2.0	441.08	7.0	3.0	7.0	4.0	4.0	4.42	100.55	PD015828	-
PD015829	ML354	Cn1c(CO)c(-c2ccccc2)c2cc([N+](=O)[O-])ccc21	GNJUKVGDCUKDLF-UHFFFAOYSA-N	F2RL3	Homo sapiens					1								1					1									8.0	282.1	4.0	1.0	3.0	3.0	3.0	3.25	68.3	PD015829	-
PD015830	ML353	O=C(c1ccc(C#Cc2cccc(F)c2)cn1)N1CC2CC2C1	PEDQCOLPUZUUGO-UHFFFAOYSA-N	GRM5	Homo sapiens					1													1									0.0	306.12	2.0	0.0	1.0	4.0	2.0	2.71	33.2	PD015830	-
PD015831	ML351	CNc1oc(-c2cccc3ccccc23)nc1C#N	DYXYXTDIFMDJIR-UHFFFAOYSA-N	ALOX15	Homo sapiens					1								1			1		1									15.0	249.09	4.0	1.0	2.0	3.0	3.0	3.41	61.85	PD015831	-
PD015832	ML350	COC(=O)c1cc(Br)cnc1N1CCC(NC2CCCCC2)C(O)C1	AJYHHWYDOWTOKZ-UHFFFAOYSA-N	OPRK1	Homo sapiens					1													1									0.0	411.12	6.0	2.0	4.0	3.0	1.0	2.49	74.69	PD015832	-
PD015833	ML349	COc1ccc(N2CCN(C(=O)c3cc4c(s3)-c3ccccc3S(=O)(=O)C4)CC2)cc1	YVIJPELUPZUEJX-UHFFFAOYSA-N	LYPLA2	Homo sapiens				1	1											1		1			1					1	1.0	454.1	6.0	0.0	3.0	5.0	3.0	3.67	66.92	PD015833	-
PD015834	ML348	O=C(CN1CCN(C(=O)c2ccco2)CC1)Nc1cc(C(F)(F)F)ccc1Cl	OXKNHBBDOIMFFQ-UHFFFAOYSA-N	LYPLA1	Homo sapiens					1											1		1									3.0	415.09	4.0	1.0	4.0	3.0	2.0	3.35	65.79	PD015834	-
PD015836	ML346	COc1ccc(/C=C/C=C2C(=O)NC(=O)NC2=O)cc1	IXYLVJHFJKDHRM-NSCUHMNNSA-N	HSPA1A	Homo sapiens					1													1									0.0	272.08	4.0	2.0	3.0	2.0	1.0	1.0	84.5	PD065026	-
PD015837	ML345	O=c1c2cc(F)ccc2sn1-c1cc(S(=O)(=O)N2CCOCC2)ccc1N1CCOCC1	FVKOFZKSMMIUTL-UHFFFAOYSA-N	IDE	Homo sapiens					1											1		1									0.0	479.1	8.0	0.0	4.0	5.0	3.0	2.05	81.08	PD015837	-
PD015838	ML337	COc1ccc(C#Cc2ccc(C(=O)N3CCC[C@@H](O)C3)c(F)c2)cc1	QBCRLDPMQHPGIM-QGZVFWFLSA-N	GRM3	Homo sapiens					1								1					1									1.0	353.14	3.0	1.0	2.0	3.0	2.0	2.83	49.77	PD027118	-
PD015839	ML336	CN1CCN(C)/C(=N\c2ccc([N+](=O)[O-])cc2C(=O)Nc2ccccc2)C1	DCAMTBFFNOHDAW-UZYVYHOESA-N		-					1													1									0.0	367.16	5.0	1.0	4.0	3.0	2.0	2.75	91.08	PD032512	-
PD015840	ML335	CCOC(=O)C1(CCc2ccccc2)CCN(Cc2ccc(NC(C)=O)cc2)CC1	VUXRYYSKTWDPLO-UHFFFAOYSA-N	OPRD1,OPRM1	Homo sapiens					1													1									4.0	408.24	4.0	1.0	8.0	3.0	2.0	4.42	58.64	PD015840	-
PD015841	ML334	O=C(O)[C@H]1CCCC[C@H]1C(=O)N1CCc2ccccc2[C@H]1CN1C(=O)c2ccccc2C1=O	LNENLABLFGGAFF-BHIFYINESA-N	KEAP1	Homo sapiens					1											1		1									2.0	446.18	4.0	1.0	4.0	5.0	2.0	3.3	94.99	PD028420	-
PD015842	ML333	O=C(Nc1ccncc1)c1ccc2ncsc2c1	WYOAQOULVFOBAD-UHFFFAOYSA-N		-					1													1									1.0	255.05	4.0	1.0	2.0	3.0	3.0	2.94	54.88	PD015842	-
PD015843	ML332	CS(=O)(=O)N(CC(=O)NCC1CC1)c1cc(C(F)(F)F)ccc1Cl	SWDFZDHXQCXDGL-UHFFFAOYSA-N	GRM5	Homo sapiens					1													1									1.0	384.05	3.0	1.0	6.0	2.0	1.0	2.65	66.48	PD015843	-
PD015844	ML331	COc1ccc2c(c1OC)C(=O)N1c3ccccc3C(=O)N(Cc3cccc(Cl)c3Cl)C21	GMRVLTHYJWJNDG-UHFFFAOYSA-N		-					1													1									0.0	468.06	4.0	0.0	4.0	5.0	3.0	5.33	59.08	PD015844	-
PD015845	ML330	COc1ccc2nc(-c3cc(OC)c(OC)c(OC)c3)cc(C(=O)NCC(=O)Nc3ccc(C(C)=O)cc3)c2c1	IUJSMHZKOZBYOW-UHFFFAOYSA-N		-					1													1									0.0	543.2	8.0	2.0	10.0	4.0	4.0	4.51	125.08	PD015845	-
PD015846	ML329	NS(=O)(=O)c1ccc(NC2=CC(=O)c3ccccc3C2=O)cc1	CSYFFQVEQXEIAB-UHFFFAOYSA-N	TRPM1	Homo sapiens					1													1								1	0.0	328.05	5.0	2.0	3.0	3.0	2.0	1.71	106.33	PD015846	-
PD015847	ML328	CCn1cc(C(=O)O)c(=O)c2cnc(N3CCN(C(S)=Nc4cccc(C(F)(F)F)c4)CC3)nc21	USYVBPXJSBDUTJ-UHFFFAOYSA-N		-					1													1									1.0	506.13	7.0	2.0	4.0	4.0	3.0	3.27	103.92	PD015847	-
PD015848	ML327	O=C(NCCCNC(=O)c1cccnc1O)c1cc(-c2ccccc2)on1	NNNDNXLMQAPQQQ-UHFFFAOYSA-N	CDH1	Homo sapiens					1													1									0.0	366.13	6.0	3.0	7.0	3.0	3.0	1.99	117.35	PD015848	-
PD015849	ML326	O=C1C(=O)N(CCOc2ccccc2)c2ccc(OC(F)(F)F)cc21	LSQVHDRSPDDZCD-UHFFFAOYSA-N	CHRM5	Homo sapiens					1													1									1.0	351.07	4.0	0.0	5.0	3.0	2.0	3.19	55.84	PD015849	-
PD015850	ML325	NC1=CC(=O)c2ccc(-c3cccc(C(=O)O)n3)nc2C1=O	HAEQQPWTMBVMLJ-UHFFFAOYSA-N	PADI1;PADI2;PADI3;PADI4	Homo sapiens					1													1								1	4.0	295.06	6.0	2.0	2.0	3.0	2.0	1.06	123.24	PD015850	-
PD015852	ML322	Cc1ccc(Cc2c(C)nc3nc(SCC(=O)NCCN4CCNCC4)nn3c2C)cc1	PXSBPTPUCHGINC-UHFFFAOYSA-N		-					1													1									0.0	453.23	8.0	2.0	8.0	4.0	3.0	1.75	87.45	PD015852	-
PD015853	ML321	CN1C(=O)c2ccccc2[S@](=O)c2ccc(C(=O)NCCc3cccs3)cc21	YXLLQNMKIDBOGH-NDEPHWFRSA-N	DRD2	Homo sapiens				1	1								1					1			1						2.0	410.08	4.0	1.0	4.0	4.0	3.0	3.48	66.48	PD037426	-
PD015854	ML318	N#CC(c1ccc(F)cc1)c1cccc(C(F)(F)F)n1	DXQNDKQUHKVTTC-UHFFFAOYSA-N		-					1													1									0.0	280.06	2.0	0.0	2.0	2.0	2.0	3.89	36.68	PD015854	-
PD015855	ML317	CCOc1ccc(-c2cc(NC(=O)c3c(F)cccc3F)c(C(=O)O)s2)cc1	NTJCKRIYCMBBDM-UHFFFAOYSA-N		-					1													1									3.0	403.07	4.0	2.0	6.0	3.0	3.0	5.04	75.63	PD015855	-
PD015856	ML316	CCOC(=O)N1C(=O)C2(CCCCC2)N(c2ccc(F)cc2)C1=S	VKKQLIVQLTYLGF-UHFFFAOYSA-N		-					1													1									0.0	350.11	4.0	0.0	2.0	3.0	1.0	3.62	49.85	PD015856	-
PD015857	ML315	Clc1cc(Cl)cc(CNc2ncncc2-c2ccc3c(c2)OCO3)c1	JQSJAVBMIMDUFO-UHFFFAOYSA-N	CLK4	Homo sapiens					1											1		1									5.0	373.04	5.0	1.0	4.0	4.0	3.0	4.79	56.27	PD015857	-
PD015858	ML314	COc1cc2nc(C3CC3)nc(N3CCN(c4ccccc4OC)CC3)c2cc1OC	SWEOAXMICIJCQC-UHFFFAOYSA-N	NTSR1	Homo sapiens					1													1						1			8.0	420.22	7.0	0.0	6.0	5.0	3.0	3.86	59.95	PD015858	-
PD015859	SR 2211	OC(c1ccc(-c2ccc(CN3CCN(Cc4ccncc4)CC3)cc2)c(F)c1)(C(F)(F)F)C(F)(F)F	KVHKWAZUPPBMLL-UHFFFAOYSA-N	RORC	Homo sapiens					1													1									1.0	527.18	4.0	1.0	6.0	4.0	3.0	5.52	39.6	PD015859	-
PD015860	ML309	Cc1ccccc1C(C(=O)NC1CCCC1)N(C(=O)Cn1cnc2ccccc21)c1cccc(F)c1	GZLNOSRHZLTDMT-UHFFFAOYSA-N	IDH1	Homo sapiens					1													1									1.0	484.23	4.0	1.0	7.0	5.0	4.0	5.32	67.23	PD015860	-
PD015861	ML308	C[C@@H]([C@@H]1CC2CC[C@H]1C2)n1c(-c2ccco2)n[nH]c1=S	BMFYLIVNFBIFOS-XHGCHNAGSA-N	KCNK9	Homo sapiens					1													1									0.0	289.12	4.0	1.0	3.0	4.0	2.0	4.2	46.75	PD032532	-
PD015862	ML307	O=C(NCC1CCN(Cc2cccc(Cl)c2)CC1)[C@@H]1CCCN(c2ncnc3c2nc2n3CCCC2)C1	TUGWBCJDBJHRHT-JOCHJYFZSA-N	UBE2N	Homo sapiens					1													1									0.0	521.27	7.0	1.0	6.0	6.0	3.0	4.06	79.18	PD032250	-
PD015863	ML306	Cc1ccc(-c2ccc(=O)n(CC(=O)NCCc3ccccc3)n2)cc1	VQUJWOQCTZQJTD-UHFFFAOYSA-N		-					1													1									1.0	347.16	4.0	1.0	6.0	3.0	3.0	2.58	63.99	PD015863	-
PD015864	ML304	CCN1CCC[C@@H]1CNC(=O)c1ccc2c(c1)NC(=O)c1cccc(C)c1S2	TUAFUWGZCFIOSV-MRXNPFEDSA-N		-					1													1									1.0	395.17	4.0	2.0	4.0	4.0	2.0	3.93	61.44	PD032252	-
PD015866	ML302	CN1CCN(NC(=O)CN2C(=O)/C(=C/c3c(Cl)ccc(Cl)c3Cl)SC2=S)CC1	GTHJLNHVDYJCCB-JYRVWZFOSA-N		-					1													1								1	2.0	477.99	6.0	1.0	4.0	3.0	1.0	3.13	55.89	PD032254	-
PD015867	ML301	COc1cccc(OC)c1-c1nc(C(=O)N[C@@H](CC(C)C)C(=O)O)cn1-c1ccnc2cc(Cl)ccc12	OUZUXYQXCXYGMX-IBGZPJMESA-N	NTSR1	Homo sapiens					1													1									1.0	522.17	7.0	2.0	9.0	4.0	4.0	4.99	115.57	PD032255	-
PD015868	ML300	O=C(N/N=C\c1ccc2c(c1)OCO2)C(=O)N/N=C/c1ccc2c(c1)OCO2	RQETWKWXXXICOJ-NORIJPHCSA-N		-					1													1									0.0	382.09	8.0	2.0	4.0	4.0	2.0	0.74	119.84	PD032256	-
PD015870	ML298	O=C(NCCN1CCC2(CC1)C(=O)NCN2c1cccc(F)c1)c1ccc(F)c(F)c1	XAPVAKKLQGLNOY-UHFFFAOYSA-N	PLD2	Homo sapiens					1													1									5.0	432.18	4.0	2.0	5.0	4.0	2.0	2.26	64.68	PD015870	-
PD015871	ML297	Cc1cc(NC(=O)Nc2ccc(F)c(F)c2)n(-c2ccccc2)n1	IEKSMUSSYJUQMY-UHFFFAOYSA-N	KCNJ3,KCNJ6	Homo sapiens					1													1									4.0	328.11	3.0	2.0	3.0	3.0	3.0	4.1	58.95	PD015871	-
PD015872	ML296	O=C(O)c1cccc(-c2ccc(-c3cn(C(=O)N4CCCCC4Cc4ccccc4)nn3)cc2)c1	SSSCOJOXPDDHOO-UHFFFAOYSA-N	ABHD6	Homo sapiens					1													1					1				1.0	466.2	5.0	1.0	5.0	5.0	4.0	5.38	88.32	PD015872	-
PD015873	ML294	COc1ccccc1-c1ccc(-c2cn(C(=O)N3CCCCC3Cc3ccccc3)nn2)cc1	MXVVJNJNDCJCFS-UHFFFAOYSA-N	DAGLB	Homo sapiens					1													1					1				3.0	452.22	5.0	0.0	5.0	5.0	4.0	5.69	60.25	PD015873	-
PD015874	ML293	COc1ccc(C)c2sc(NC(=O)c3ccncc3)nc12	MADRUEVBYJEFFT-UHFFFAOYSA-N	CHRM4	Homo sapiens					1													1									1.0	299.07	5.0	1.0	3.0	3.0	3.0	3.26	64.11	PD015874	-
PD015875	ML291	O=C(Nc1ccc(S(=O)(=O)N2CCC(Cl)CC2)cc1)c1ccc([N+](=O)[O-])o1	XKMLYHZJKCRLOI-UHFFFAOYSA-N		-					1													1									1.0	413.04	6.0	1.0	5.0	3.0	2.0	2.83	122.76	PD015875	-
PD015876	ML290	CC(C)Oc1ccccc1C(=O)Nc1ccccc1C(=O)Nc1cccc(S(=O)(=O)C(F)(F)F)c1	RSYHJSDOGMSLDH-UHFFFAOYSA-N	RXFP1	Homo sapiens					1								1					1						1			1.0	506.11	5.0	2.0	7.0	3.0	3.0	5.27	101.57	PD015876	-
PD015877	ML289	COc1ccc(C#Cc2ccc(C(=O)N3CCC[C@@H](CO)C3)cc2)cc1	VSLWUPHHCFQTDB-LJQANCHMSA-N	GRM3	Homo sapiens					1													1									1.0	349.17	3.0	1.0	3.0	3.0	2.0	2.94	49.77	PD024024	-
PD015878	ML288	CCNC(=O)CCc1nc(-c2ccc(-c3ccccc3)cc2)no1	BOBUQNNMMXCYKU-UHFFFAOYSA-N	NR0B2	Homo sapiens					1													1									0.0	321.15	4.0	1.0	6.0	3.0	3.0	3.47	68.02	PD015878	-
PD015879	ML287	Cc1nnc(SCC(=O)Nc2ccccc2)n1CC1CCCO1	BSWTWOHQWNMSCA-UHFFFAOYSA-N	NR0B2	Homo sapiens					1													1									0.0	332.13	6.0	1.0	6.0	3.0	2.0	2.5	69.04	PD015879	-
PD015881	ML282	CC1(C)Cc2c(sc(NC(=S)NC(=O)c3ccccc3)c2C(=O)O)CO1	ATSWBWHRHAQVFM-UHFFFAOYSA-N	HRAS	Homo sapiens					1													1									10.0	390.07	5.0	3.0	3.0	3.0	2.0	3.42	87.66	PD015881	-
PD015882	ML281	CC(C)c1ccc(NC(=O)c2cccs2)c(-c2nc3ccccc3[nH]c2=O)c1	HWOYIOLMBQSTQS-UHFFFAOYSA-N	STK33	Homo sapiens					1													1									1.0	389.12	4.0	2.0	4.0	4.0	4.0	5.03	74.85	PD015882	-
PD015883	ML280	COc1cc(/C=C2\SC(Nc3ccccc3OC)=NC2=O)ccc1O	VFLCEEKFNGVMNQ-YBEGLDIGSA-N	STK33	Homo sapiens					1													1								1	3.0	356.08	6.0	2.0	4.0	3.0	2.0	3.49	80.15	PD032270	-
PD015884	ML279	C[C@H](C(=O)NC1CCCC1)N(C(=O)Cn1nnc(-c2ccc3c(c2)OCO3)n1)C1CCCCC1	RZNBRWZQSTXMIV-MRXNPFEDSA-N	SCARB1	Homo sapiens					1													1									1.0	468.25	8.0	1.0	7.0	5.0	2.0	2.68	111.47	PD037789	-
PD015885	ML278	COCC(=O)N1CCc2cc(-c3csc(NC(=O)c4cc(OC)cc(OC)c4)n3)ccc21	QKSHBFODFUXUIY-UHFFFAOYSA-N	SCARB1	Homo sapiens					1													1									1.0	453.14	7.0	1.0	7.0	4.0	3.0	3.62	89.99	PD015885	-
PD015886	ML276	CCN1CCC[C@@H]1CNC(=O)c1ccc2c(c1)NC(=O)/C(=C/c1ccccc1F)S2	SPCVDRWAFFUROT-OJSPLJLUSA-N		-					1													1									2.0	425.16	4.0	2.0	5.0	4.0	2.0	4.13	61.44	PD032273	-
PD015887	ML275	COCCCNC(=O)c1ccc(Cn2c(=O)c3ccccc3n(Cc3ccc(C(C)C)cc3)c2=O)cc1	DFHVQORUCUBCMJ-UHFFFAOYSA-N		-					1													1									0.0	499.25	6.0	1.0	10.0	4.0	4.0	4.15	82.33	PD015887	-
PD015888	ML273	C[C@@H](NC(=O)c1ccc(C#Cc2cccc(F)c2)cn1)C(C)(C)O	ZPKZAFDYFVJULO-CYBMUJFWSA-N	GRM5	Homo sapiens					1													1									1.0	326.14	3.0	2.0	3.0	2.0	2.0	2.51	62.22	PD022053	-
PD015889	ML269	Cc1ccc(S(=O)(=O)n2ccc(-c3c(-c4ccc(Cl)cc4)noc3C)n2)cc1	BHENJTVMMYJPBH-UHFFFAOYSA-N	MCOLN3	Homo sapiens					1													1									0.0	413.06	6.0	0.0	4.0	4.0	4.0	4.71	77.99	PD015889	-
PD015890	ML268	CCOc1ccc(S(=O)(=O)N2CCCCCC2)c2ccccc12	YPGOVAKRQUAHIC-UHFFFAOYSA-N	MCOLN3	Homo sapiens					1													1									2.0	333.14	3.0	0.0	4.0	3.0	2.0	3.8	46.61	PD015890	-
PD015891	ML267	COc1ccnc(NC(=S)N2CCN(c3ncc(C(F)(F)F)cc3Cl)CC2)c1	AIKZMHUYNNXENU-UHFFFAOYSA-N	FFP	Bacillus subtilis					1													1									0.0	431.08	5.0	1.0	3.0	3.0	2.0	3.68	53.52	PD015891	-
PD015892	ML266	CN(C(=O)CNC(=O)c1ccccc1OCC(=O)Nc1ccc(Br)cc1)c1ccccc1	VAPWBKACLHRZBZ-UHFFFAOYSA-N	GBA	Homo sapiens					1													1									0.0	495.08	4.0	2.0	8.0	3.0	3.0	3.86	87.74	PD015892	-
PD015893	ML264	CN(C(=O)CNC(=O)/C=C/c1cccc(Cl)c1)C1CCS(=O)(=O)CC1	AJCDZIDKYKCOMZ-AATRIKPKSA-N	KLF5	Homo sapiens					1													1									1.0	384.09	4.0	1.0	5.0	2.0	1.0	1.5	83.55	PD032281	-
PD015894	ML262	CCOc1ccc(CCNC(=O)c2cc(-c3ccccc3)c(N3CCOCC3)s2)cc1OCC	XJRACSVZNIKMPG-UHFFFAOYSA-N		-					1													1									0.0	480.21	6.0	1.0	10.0	4.0	3.0	5.02	60.03	PD015894	-
PD015895	ML261	CCOc1ccc(CCNC(=O)c2cc3sc(Cl)cc3n2C)cc1OCC	DGNXYXASQJMULD-UHFFFAOYSA-N		-					1													1									3.0	406.11	5.0	1.0	8.0	3.0	3.0	4.66	52.49	PD015895	-
PD015896	ML259	Cc1ccc(C)c(NC(=O)CNS(=O)(=O)c2ccc3[nH]c(=O)oc3c2)c1	NOEHWVSISATFED-UHFFFAOYSA-N	ALPI	Homo sapiens					1													1									3.0	375.09	5.0	3.0	5.0	3.0	3.0	1.65	121.27	PD015896	-
PD015897	ML258	COc1ccc(Cn2c(=O)c3c(n4nnnc24)-c2ccccc2CC32CCCC2)cc1	ROLAAOPXUWECGQ-UHFFFAOYSA-N	BCL2L11	Homo sapiens					1													1									1.0	413.19	7.0	0.0	3.0	6.0	4.0	3.38	74.31	PD015897	-
PD015898	ML257	CC[C@@]1(c2ccc(C)cc2)C(=O)N(C(=O)OC(C)C)N1C(=O)OC(C)C	OGWFJUWIADRFCX-LJQANCHMSA-N		-					1													1									0.0	362.18	5.0	0.0	4.0	2.0	1.0	3.75	76.15	PD032286	-
PD015899	ML256	Cc1cc(N2CCN(C(=O)Oc3ccc(-c4ccccc4)cn3)CC2)c2ccccc2n1	UJAPZGDOBGLQJC-UHFFFAOYSA-N	PLA2G7	Homo sapiens					1													1									2.0	424.19	5.0	0.0	3.0	5.0	4.0	4.93	58.56	PD015899	-
PD015900	ML254	CC1(NC(=O)c2ccc(C#Cc3cccc(F)c3)cn2)COC1	YMYCVXPMSMNWEP-UHFFFAOYSA-N	GRM5	Homo sapiens				1	1													1			1						2.0	310.11	3.0	1.0	2.0	3.0	2.0	2.14	51.22	PD015900	-
PD015901	ML253	Cc1nc2sc(C(=O)NCc3ccncc3)c(N)c2c(C)c1Cl	XNCQMFVABACABG-UHFFFAOYSA-N	CHRM4	Homo sapiens					1													1									1.0	346.07	5.0	2.0	3.0	3.0	3.0	3.47	80.9	PD015901	-
PD015903	ML251	O=C(Cc1ccc(Cl)c(Cl)c1)Nc1ccc(S(=O)(=O)Nc2ccon2)cc1	AIDVIFPYWYKRCE-UHFFFAOYSA-N		-					1													1									2.0	425.0	5.0	2.0	6.0	3.0	3.0	3.96	101.3	PD015903	-
PD015904	CYM 50769	COc1ccc(Oc2c(Cl)cnn(C3c4ccccc4-c4ccccc43)c2=O)cc1	QHVSQUYCVUHYKT-UHFFFAOYSA-N	NPBWR1	Homo sapiens					1											1		1									1.0	416.09	5.0	0.0	4.0	5.0	4.0	5.32	53.35	PD015904	-
PD015905	CYM 5541	O=C(c1cc(C2CC2)on1)N(C1CCCCC1)C1CCCCC1	NDKGACIWVAOUQH-UHFFFAOYSA-N	S1PR3	Homo sapiens				1	1								1					1			1						2.0	316.22	3.0	0.0	4.0	4.0	1.0	4.66	46.34	PD015905	-
PD015906	ML248	COCC/N=C1/S/C(=C\c2cc(C)n(-c3ccc(F)cc3F)c2C)C(=O)N1C	BKQZKTRCUAWRHT-PDIQUHFFSA-N	S1PR4	Homo sapiens					1													1									0.0	405.13	5.0	0.0	5.0	3.0	2.0	3.92	46.83	PD032294	-
PD015907	ML247	CCCN1CNc2c(c(=O)[nH]c(=S)n2Cc2ccc(OC)c(OC)c2)C1	FBESZLCTQRAXBF-UHFFFAOYSA-N	GAA	Homo sapiens					1													1									1.0	376.16	7.0	2.0	6.0	3.0	2.0	2.57	71.52	PD015907	-
PD015908	ML246	N=c1c2c(-c3ccccc3)c(-c3ccccc3)n(Cc3ccccc3)c2ncn1[C@H]1CC[C@H](O)CC1	WSMXAUJFLWRPNT-DIVCQZSQSA-N	PTBP1	Homo sapiens					1													1									0.0	474.24	5.0	2.0	5.0	6.0	5.0	6.18	66.83	PD032296	-
PD015909	ML245	Cc1csc(NC(=O)c2ccc(COc3cccc(Cl)c3)o2)n1	KFOOHRHDHDMWHL-UHFFFAOYSA-N		-					1													1									0.0	348.03	5.0	1.0	5.0	3.0	3.0	4.53	64.36	PD015909	-
PD015910	ML244	Cc1c(C)n(Cc2ccc(-c3ccccc3C(=O)O)cc2)c2ccc(C(=O)N[C@@H](C)c3ccc([N+](=O)[O-])cc3)cc12	IIJDFXNUWZTHIM-NRFANRHFSA-N	PPARG	Homo sapiens					1													1									1.0	547.21	5.0	2.0	8.0	5.0	5.0	7.07	114.47	PD032298	-
PD015911	ML243	CCc1ccc(/C=C/C(=O)NC2=NCCS2)cc1	MTLJBAFNMHPGBV-BQYQJAHWSA-N		-					1													1									0.0	260.1	3.0	1.0	3.0	2.0	1.0	2.48	41.46	PD032299	-
PD015912	ML242	O=C(CSc1nc(O)c2ccccc2n1)NC1CCCCC1	JRPDLGLCHZXWTQ-UHFFFAOYSA-N		-					1													1									0.0	317.12	5.0	2.0	4.0	3.0	2.0	2.88	75.11	PD015912	-
PD015913	ML241	c1ccc(CNc2nc(N3CCOc4ccccc43)nc3c2CCCC3)cc1	RMZPVQQGYVSLAP-UHFFFAOYSA-N	VCP	Homo sapiens					1													1									0.0	372.2	5.0	1.0	4.0	5.0	3.0	4.5	50.28	PD015913	-
PD015914	ML240	COc1cccc2c(NCc3ccccc3)nc(-n3c(N)nc4ccccc43)nc12	NHAMBLRUUJAFOY-UHFFFAOYSA-N	VCP	Homo sapiens					1													1									1.0	396.17	7.0	2.0	5.0	5.0	5.0	4.17	90.88	PD015914	-
PD015915	ML239	O=C(COc1c(Cl)cc(Cl)cc1Cl)NN/C=C1/C=CC=N1	SZYDKEIZVCSYNB-TWGQIWQCSA-N		-					1													1									0.0	344.98	4.0	2.0	5.0	2.0	1.0	3.13	62.72	PD032303	-
PD015916	ML238	C[C@H]1CCCCO[C@@H](CN(C)S(=O)(=O)c2ccc(F)cc2)[C@H](C)CN([C@@H](C)CN(C)C)C(=O)c2cc(NC(=O)Nc3ccccc3)ccc2O1	BKTXRPJVVXUPPO-PNCWTNKOSA-N		-					1													1									0.0	711.35	7.0	2.0	9.0	4.0	3.0	6.16	120.52	PD032304	-
PD015917	ML237	CCOc1ccc(-c2nc(CSCC(=O)NC3CC3)c(C)o2)cc1	KJKRTEBDWADQLS-UHFFFAOYSA-N		-					1													1									3.0	346.14	5.0	1.0	8.0	3.0	2.0	3.56	64.36	PD015917	-
PD015918	ML236	CNC(=O)CCc1nc(-c2ccc(C(C)(C)C)cc2)no1	NOGDJCUSTNXIOS-UHFFFAOYSA-N	NR5A1	Homo sapiens					1													1									7.0	287.16	4.0	1.0	4.0	2.0	2.0	2.71	68.02	PD015918	-
PD015919	ML233	CC1=CC(=O)C(C2CCCCC2)=C/C1=N/OS(=O)(=O)c1ccccc1	RSMZOLWJZGIWOV-ZZEZOPTASA-N	APLNR	Homo sapiens					1													1								1	1.0	359.12	5.0	0.0	4.0	3.0	1.0	3.78	72.8	PD022292	-
PD015920	ML232	Cc1ccc(C)c(NC(=O)[C@@H]2CCCN2S(=O)(=O)c2cccc3cccnc23)c1	QJNWPHOXGBKSAD-IBGZPJMESA-N		-					1													1									0.0	409.15	4.0	1.0	4.0	4.0	3.0	3.64	79.37	PD036759	-
PD015921	ML231	CNc1nc(N)c([N+](=O)[O-])c(Nc2cccc(Cl)c2)n1	NOGLUAGKODIFPO-UHFFFAOYSA-N		-					1													1									2.0	294.06	7.0	3.0	4.0	2.0	2.0	2.41	119.0	PD015921	-
PD015922	ML230	O=C(c1ccoc1)N1CCN(c2cc(-c3ccco3)nc3cc(-c4ccccc4)nn23)CC1	LRPGMVPQQLBMNE-UHFFFAOYSA-N	ABCG2	Homo sapiens					1													1									0.0	439.16	7.0	0.0	4.0	6.0	5.0	4.21	80.02	PD015922	-
PD015923	ML229	O=C(Cn1c2ccccc2c2nc3n(c(=O)c21)CCS3)N1CCCC1	KCFDEHUJFJKLQS-UHFFFAOYSA-N		-					1													1									0.0	354.12	6.0	0.0	2.0	5.0	3.0	2.08	60.13	PD015923	-
PD015924	ML228	c1ccc(-c2ccc(CNc3nc(-c4ccccn4)nnc3-c3ccccc3)cc2)cc1	QNRODODTMXCRKU-UHFFFAOYSA-N		-					1													1									1.0	415.18	5.0	1.0	6.0	5.0	5.0	5.88	63.59	PD015924	-
PD015925	ML227	N#Cc1ccc(OCCCN2CCC(C(O)(c3ccccc3)C3CCCC3)CC2)cc1	QBITUTDDFZQXDO-UHFFFAOYSA-N	KMT2A,MEN1	Homo sapiens					1													1									2.0	418.26	4.0	1.0	8.0	4.0	2.0	5.12	56.49	PD015925	-
PD015927	ML225	O=C(N1CCCC1)n1ncc(-c2ccc(-c3ccccc3)cc2)n1	UKVJRODNCZDEBC-UHFFFAOYSA-N	PAFAH2	Homo sapiens					1													1									0.0	318.15	4.0	0.0	2.0	4.0	3.0	3.68	51.02	PD015927	-
PD015928	ML224	COc1ccc(C2Nc3ccccc3C(=O)N2Cc2ccco2)cc1COc1c(C)cc(NC(C)=O)cc1C	BFTSWGYWHRJVNI-UHFFFAOYSA-N	TSHR	Homo sapiens					1													1									0.0	525.23	6.0	2.0	8.0	5.0	4.0	6.21	93.04	PD015928	-
PD015929	ML223	O=C1CN=C(c2ccc[nH]2)c2cc(Cl)ccc2N1	XWNMORIHKRROGW-UHFFFAOYSA-N	CBFB,RUNX1	Homo sapiens					1													1									2.0	259.05	2.0	2.0	1.0	3.0	2.0	2.46	57.25	PD015929	-
PD015930	ML221	O=C(Oc1coc(CSc2ncccn2)cc1=O)c1ccc([N+](=O)[O-])cc1	UASIRTUMPRQVFY-UHFFFAOYSA-N	APLNR	Homo sapiens					1													1									1.0	385.04	9.0	0.0	6.0	3.0	3.0	2.85	125.43	PD015930	-
PD015931	ML220	CCOC(=O)C1CCN(C(=O)C(C)(C)NC(=O)Nc2ccccc2Cl)CC1	OYUKTDHJKYJEGC-UHFFFAOYSA-N		-					1													1									0.0	395.16	4.0	2.0	5.0	2.0	1.0	3.04	87.74	PD015931	-
PD015932	ML219	CCOc1ccc(CCNC(=O)c2cc3sccc3n2Cc2cccc(C)c2)cc1OCC	LGJRYJGSSSDVJS-UHFFFAOYSA-N		-					1													1									0.0	462.2	5.0	1.0	10.0	4.0	4.0	5.83	52.49	PD015932	-
PD015933	ML218	CC(C)(C)CCN1C[C@H]2C(CNC(=O)c3cc(Cl)cc(Cl)c3)[C@H]2C1	GSJIGYLGKSBYBC-ALOPSCKCSA-N	CACNA1H	Homo sapiens					1													1									1.0	368.14	2.0	1.0	5.0	3.0	1.0	4.34	32.34	PD022101	-
PD015934	ML217	Cc1ccc(OCCn2c(CCNC(=O)C3CCCCC3)nc3ccccc32)cc1	YMBZFKXYDBFYTC-UHFFFAOYSA-N		-					1													1								1	2.0	405.24	4.0	1.0	8.0	4.0	3.0	4.66	56.15	PD015934	-
PD015935	ML215	COc1ccc(-c2nn(-c3ccccc3)cc2/C=C2/SC(=S)N(CCC(=O)O)C2=O)c(C)c1	CNMBEYAZXFHTTF-DEDYPNTBSA-N		-					1													1								1	9.0	479.1	7.0	1.0	7.0	4.0	3.0	4.53	84.66	PD032323	-
PD015936	ML214	Cn1c(=O)c([N+](=O)[O-])c(Cl)c2ccccc21	KPDOVJBEKCRATD-UHFFFAOYSA-N	BCL2L11	Homo sapiens					1													1									14.0	238.01	4.0	0.0	1.0	2.0	2.0	2.1	65.14	PD015936	-
PD015937	ML213	Cc1cc(C)c(NC(=O)C2CC3CCC2C3)c(C)c1	SIQGKPGBLYKQBB-UHFFFAOYSA-N	KCNQ2	Homo sapiens					1													1									3.0	257.18	1.0	1.0	2.0	3.0	1.0	3.99	29.1	PD015937	-
PD015938	ML212	COC(=O)Cn1nc(-c2cccc(OC)c2)c2ccccc21	HKESSCOHFVBZRN-UHFFFAOYSA-N		-					1													1									1.0	296.12	5.0	0.0	4.0	3.0	3.0	2.88	53.35	PD015938	-
PD015939	ML211	CC(C)(C)C1CCN(C(=O)n2ncc(C(O)(c3ccccc3)c3ccccc3)n2)CC1	LPTMHNPBMQCQPG-UHFFFAOYSA-N	LYPLA1;LYPLA2	Homo sapiens					1													1									2.0	418.24	5.0	1.0	3.0	4.0	3.0	4.29	71.25	PD015939	-
PD015940	ML209	COc1cc(O)c(C(CC(=O)N2C[C@@H](C)C[C@@H](C)C2)c2ccc3c(c2)OCO3)c(OC)c1	YEKVAIMYYCZDLI-MCPYQZEQSA-N	RORC	Homo sapiens				1	1													1			1						5.0	441.22	6.0	1.0	6.0	4.0	2.0	4.16	77.46	PD032327	-
PD015941	ML206	O=C(N[C@@H]1CCCc2c1cnn2-c1ccc(F)cc1F)c1ccccn1	NEHMBGOWUSGTLI-OAHLLOKOSA-N		-					1													1									0.0	354.13	4.0	1.0	3.0	4.0	3.0	3.35	59.81	PD032328	-
PD015942	ML205	CC(C)(C)c1ccc(C(=O)Nc2cc(Cl)c(Br)cc2C(=O)O)cc1	LWAMRPSNUXYBFU-UHFFFAOYSA-N		-					1													1									1.0	409.01	2.0	2.0	3.0	2.0	2.0	5.35	66.4	PD015942	-
PD015943	ML202	COc1cccc(Cn2ncc3c4sc(S(C)=O)cc4n(C)c3c2=O)c1	MORBXZMIXGYQDB-UHFFFAOYSA-N	PKM	Homo sapiens					1													1									1.0	387.07	7.0	0.0	4.0	4.0	4.0	2.74	66.12	PD015943	-
PD015944	ML201	CC(=O)c1ccc(N2CCN(S(=O)(=O)c3ccc4c(c3)CC(=O)N4)CC2)cc1	IOWHNNUEAIMNRP-UHFFFAOYSA-N	GAA	Homo sapiens					1													1									2.0	399.13	5.0	1.0	4.0	4.0	2.0	1.89	86.79	PD015944	-
PD015945	ML200	CSc1ccc(-c2cnc(N3CCC(C(N)=O)CC3)s2)cc1	ZFIWZVVHNRUILB-UHFFFAOYSA-N	SMN1	Homo sapiens					1													1									1.0	333.1	5.0	1.0	4.0	3.0	2.0	3.23	59.22	PD015945	-
PD015946	ML199	CC(=O)Nc1sc2c(c1-c1nc3ccccc3s1)CNC2	MODNMLYGANOZDZ-UHFFFAOYSA-N	APEX1	Homo sapiens					1											1		1									2.0	315.05	5.0	2.0	2.0	4.0	3.0	3.59	54.02	PD015946	-
PD015947	ML198	C#Cc1ccc(NC(=O)c2cnn3c(C)cc(C)nc23)cc1	HVZPJBKUFRREQC-UHFFFAOYSA-N	GBA	Homo sapiens					1													1									1.0	290.12	4.0	1.0	2.0	3.0	3.0	2.58	59.29	PD015947	-
PD015948	CID 2745687	COC(=O)c1cnn(-c2ccc(F)cc2F)c1/C=N/NC(=S)NC(C)(C)C	CYNLZIBKERMMOA-AWQFTUOYSA-N	GPR35	Homo sapiens				1	1											1		1			1						5.0	395.12	6.0	2.0	4.0	2.0	2.0	2.53	80.54	PD037253	-
PD015949	ML193	Cc1cc(C)c2nc(-c3ccccn3)cc(C(=O)Nc3ccc(S(=O)(=O)Nc4onc(C)c4C)cc3)c2c1	HTSLEZOTMYUPLU-UHFFFAOYSA-N	GPR55	Homo sapiens					1								1					1									19.0	527.16	7.0	2.0	6.0	5.0	5.0	5.57	127.08	PD015949	-
PD015950	ML192	Cc1nc(N2CCN(C(=O)c3ccco3)CC2)c2c3c(sc2n1)CCCC3	GDPDARVUXXOYAJ-UHFFFAOYSA-N	GPR55	Homo sapiens					1													1									7.0	382.15	6.0	0.0	2.0	5.0	3.0	3.43	62.47	PD015950	-
PD015951	ML191	Cc1ccc(C2(C(=O)N3CCC(n4nc(-c5ccccc5)oc4=O)CC3)CC2)cc1	WWJKJCDOYFKZBJ-UHFFFAOYSA-N	GPR55	Homo sapiens					1													1									1.0	403.19	5.0	0.0	4.0	5.0	3.0	3.71	68.34	PD015951	-
PD015952	ML190	COc1ccc(N2CCN(CCCNC(=O)Cn3c(=O)c4cccn4c4c(C)ccnc43)CC2)cc1	PMTIWRPLQBVEMR-UHFFFAOYSA-N	OPRK1	Homo sapiens					1													1								1	1.0	488.25	8.0	1.0	8.0	5.0	4.0	2.29	84.11	PD015952	-
PD015953	ML189	O=C(c1ccc(Cl)cc1)N1CCN(c2ccnc3cc(Cl)ccc23)CC1	AAYTXOPXLXAKHP-UHFFFAOYSA-N		-					1													1									8.0	385.07	3.0	0.0	2.0	4.0	3.0	4.5	36.44	PD015953	-
PD015954	ML188	CC(C)(C)NC(=O)[C@@H](c1cccnc1)N(C(=O)c1ccco1)c1ccc(C(C)(C)C)cc1	JXGIYKRRPGCLFV-JOCHJYFZSA-N		-					1													1									2.0	433.24	4.0	1.0	5.0	3.0	3.0	5.27	75.44	PD032342	-
PD015955	ML187	C[C@@H](CO)N1C[C@@H](C)[C@H](CN(C)S(=O)(=O)c2ccc3c(c2)OCCO3)Oc2c(NC(=O)Nc3cccc4ccccc34)cccc2C1=O	YDFFDCBBGWXONN-MODXFSQWSA-N		-					1											1		1									0.0	674.24	8.0	3.0	8.0	6.0	4.0	4.8	146.74	PD032343	-
PD015956	ML186	COc1ccc(S(=O)(=O)N2CCOCC2)cc1NC(=O)c1cc2c(s1)CCCC2	HRQXJJWQYKYFHP-UHFFFAOYSA-N	GPR55	Homo sapiens					1													1									6.0	436.11	6.0	1.0	5.0	4.0	2.0	2.91	84.94	PD015956	-
PD015957	ML185	COc1ccc(-c2csc(NC(=O)CSc3nnc4c(C)cc5ccccc5n34)n2)cc1	VTIQOPXBRQFVHQ-UHFFFAOYSA-N	GPR55	Homo sapiens					1													1									2.0	461.1	8.0	1.0	6.0	5.0	5.0	5.05	81.41	PD015957	-
PD015958	ML-184	Cc1cccc(N2CCN(C(=O)c3cc(S(=O)(=O)N(C)C)ccc3N3CCCC3)CC2)c1C	VRSJAHQGJHDACS-UHFFFAOYSA-N	GPR55	Homo sapiens					1													1									6.0	470.24	5.0	0.0	5.0	4.0	2.0	3.12	64.17	PD015958	-
PD015959	ML183	CN[C@@H](C)C(=O)N[C@H](C(=O)N[C@@H](C)C(=O)Nc1cccc2ccccc12)C(C)C	JSZPIOJRNMIRQD-DOXZYTNZSA-N	XIAP	Homo sapiens					1													1									1.0	398.23	4.0	4.0	8.0	2.0	2.0	2.03	99.33	PD037961	-
PD015960	ML182	O=C(Nc1ccc(N2C(=O)C3[C@H]4C=C[C@H](C4)[C@H]3C2=O)c(Cl)c1)c1ccccn1	LJUABYFUJVRUSJ-KNGMQDLYSA-N	GRM4	Homo sapiens					1													1									5.0	393.09	4.0	1.0	3.0	5.0	2.0	3.3	79.37	PD026943	-
PD015961	ML181	COc1ccc(Oc2c(Cl)cnn(-c3cc(C)cc(C)c3)c2=O)cc1	RTIGBOQZDVBXCO-UHFFFAOYSA-N	NPBWR1	Homo sapiens					1													1									2.0	356.09	5.0	0.0	4.0	3.0	3.0	4.3	53.35	PD015961	-
PD015962	ML-180	O=c1cc(N2CCN(c3cccc(Cl)c3)CC2)[nH]c(=O)n1C1CCCCC1	CHMQQIFPOIZPIJ-UHFFFAOYSA-N	NR5A2	Homo sapiens					1													1									8.0	388.17	5.0	1.0	3.0	4.0	2.0	3.02	61.34	PD015962	-
PD015963	ML 179	O=c1cc(N2CCN(c3cccc(C(F)(F)F)c3)CC2)[nH]c(=O)n1C1CCCCC1	MFABFKUNLDYKGH-UHFFFAOYSA-N	NR5A2	Homo sapiens					1													1									0.0	422.19	5.0	1.0	3.0	4.0	2.0	3.39	61.34	PD015963	-
PD015964	ML178	Clc1ccc(OCCOc2ccc(Br)nc2Br)c(Cl)c1	KMGUBUXDNOMSRM-UHFFFAOYSA-N	S1PR4	Homo sapiens				1	1													1			1						1.0	438.84	3.0	0.0	5.0	2.0	2.0	5.37	31.35	PD015964	-
PD015965	ML177	O=[N+]([O-])c1cccc2[nH]c(CNc3nc(N4CCOCC4)nc4c3ncn4-c3ccsc3)nc12	FLKHSCQMBSUMSH-UHFFFAOYSA-N	WEE1	Homo sapiens					1													1									0.0	477.13	11.0	2.0	6.0	6.0	5.0	3.11	139.92	PD015965	-
PD015966	ML175	O=C(CCl)N(CCCNC(=O)C(F)(F)F)c1ccc([N+](=O)[O-])cc1	RPFLJHUKWQKWPO-UHFFFAOYSA-N	GSTO1	Homo sapiens					1													1									4.0	367.05	4.0	1.0	7.0	1.0	1.0	2.24	92.55	PD015966	-
PD015967	ML174	COC(=O)N1C(=O)[C@](c2ccccc2)(C2CCCC2)N1C(=O)OC	ZRHWCAFAIHTQKD-KRWDZBQOSA-N	PPME1	Homo sapiens				1	1											1		1			1						4.0	332.14	5.0	0.0	2.0	3.0	1.0	2.66	76.15	PD025492	-
PD015968	ML173	Cc1cc(OCc2ccncc2)nc2sc(C(=O)NCc3cccc(F)c3F)c(N)c12	WISIHNWJSXFHCG-UHFFFAOYSA-N	CHRM4	Homo sapiens					1													1									1.0	440.11	6.0	2.0	6.0	4.0	4.0	4.37	90.13	PD015968	-
PD015969	ML172	O=C1C(=O)N(Cc2ccc(Oc3ccccc3)cc2)c2ccc(OC(F)(F)F)cc21	HRSJEMJKLHWGLF-UHFFFAOYSA-N	CHRM5	Homo sapiens					1													1									2.0	413.09	4.0	0.0	5.0	4.0	3.0	5.11	55.84	PD015969	-
PD015970	ML170	Cc1ccc(NS(=O)(=O)c2ccc3c(c2)CCC(=O)N3)cc1C	SNFROMRRGGKYTF-UHFFFAOYSA-N	PKM	Homo sapiens					1													1									2.0	330.1	3.0	2.0	3.0	3.0	2.0	2.99	75.27	PD015970	-
PD015971	ML169	Cc1cc(NC(=O)CS(=O)(=O)c2cn(Cc3cc(Br)ccc3F)c3ccccc23)no1	RUYRNYRGPSAXTK-UHFFFAOYSA-N	CHRM1	Homo sapiens					1													1									1.0	505.01	6.0	1.0	6.0	4.0	4.0	4.3	94.2	PD015971	-
PD015972	ML168	Cn1nnnc1Sc1ncnc2scc(-c3ccccc3)c12	HIPMWEIBNDUPSH-UHFFFAOYSA-N	HTT	Homo sapiens					1													1									11.0	326.04	8.0	0.0	3.0	4.0	4.0	3.03	69.38	PD015972	-
PD015973	ML165	NCC(=O)Nc1cccc(-c2nn3c(=O)cc(N4CCNCC4)nc3s2)c1	ITNCYPYTFKVCFI-UHFFFAOYSA-N	ITGA2B,ITGB3	Homo sapiens					1													1									2.0	385.13	9.0	3.0	4.0	4.0	3.0	0.12	117.65	PD015973	-
PD015974	ML164	Cc1ccc(NC(=O)CCC(=O)N/N=C/c2ccc([N+](=O)[O-])o2)cc1C	UKQWTRJZFLXIQL-VCHYOVAHSA-N		-					1													1									1.0	358.13	6.0	2.0	7.0	2.0	2.0	2.67	126.84	PD036726	-
PD015975	ML163	c1ccc2c(Nc3nnc(-c4ccncc4)s3)cccc2c1	FNNACNWDEVQPDH-UHFFFAOYSA-N	SNCA	Homo sapiens					1													1									9.0	304.08	5.0	1.0	3.0	4.0	4.0	4.5	50.7	PD015975	-
PD015976	ML160	Cc1ccc(-n2c(N)c(C#N)c(-c3ccccc3)c(C#N)c2=O)cc1	DWDWEGGEKMILES-UHFFFAOYSA-N		-					1													1									3.0	326.12	5.0	1.0	2.0	3.0	3.0	3.14	95.6	PD015976	-
PD015977	ML159	C/C(=N\NC(=O)C1CCCC1)c1ccc(NC(=O)C(F)(F)F)cc1	QXFVQXRFCWCTQE-UFFVCSGVSA-N		-					1													1									0.0	341.14	3.0	2.0	4.0	2.0	1.0	3.22	70.56	PD032365	-
PD015978	ML158	COc1ccc(CCN(C)C(=O)C2CCCN(Cc3ccc(OC)c(OC)c3)C2)cc1OC	XJJDWEDQSMGTCV-UHFFFAOYSA-N		-					1													1									3.0	456.26	6.0	0.0	10.0	3.0	2.0	3.63	60.47	PD015978	-
PD015979	ML157	CCCn1ncc(CN2CCCC(C(=O)c3cccc(OC(C)C)c3)C2)c1C	TXMPMEQLXDHGQS-UHFFFAOYSA-N		-					1													1									1.0	383.26	5.0	0.0	8.0	3.0	2.0	4.48	47.36	PD015979	-
PD015980	ML156	S=C(NCCCc1cnc[nH]1)NCCCN(Cc1ccc(Cl)c(Cl)c1)c1ccc(Br)cn1	UREJDUPKGMFJRU-UHFFFAOYSA-N	GBA	Homo sapiens					1											1		1									7.0	554.04	4.0	3.0	11.0	3.0	3.0	5.37	68.87	PD015980	-
PD015982	ML154	Cc1c(P(=S)(c2ccccc2)c2ccccc2)[n+]2ccccc2n1C/C=C/c1ccccc1	VSWYSDPXUHVQCG-DTQAZKPQSA-N	NPSR1	Homo sapiens				1	1							1	1					1	1		1						2.0	465.15	2.0	0.0	6.0	5.0	5.0	5.0	9.03	PD119375	-
PD015983	ML152	O=C1CCCC2=C1C1(CCCC1)N=C(Nc1nc3ccccc3o1)N2	FDNVTCDQGOVLPM-UHFFFAOYSA-N	GALK1	Homo sapiens					1													1									3.0	336.16	6.0	2.0	1.0	5.0	2.0	3.52	79.52	PD015983	-
PD015984	ML151	CS(=O)(=O)c1ccc(C(=O)OCC(=O)NC23CC4CC(CC(C4)C2)C3)cc1[N+](=O)[O-]	BTXTVUJWNPMQBT-UHFFFAOYSA-N	THRB	Homo sapiens					1													1									8.0	436.13	7.0	1.0	6.0	5.0	1.0	2.24	132.68	PD015984	-
PD015985	ML150	CN(C)c1nc(N)nc(CSc2nnnn2-c2cccc3ccccc23)n1	KEGAOGGMAQQKFO-UHFFFAOYSA-N	SNCA	Homo sapiens					1													1									8.0	379.13	10.0	1.0	5.0	4.0	4.0	1.94	111.53	PD015985	-
PD015986	ML149	Cc1cc(-c2nnc3n2CCCCC3)c(C)n1-c1ccccc1	SGHSEHOWYLRAPR-UHFFFAOYSA-N	HPGD	Homo sapiens					1													1									4.0	306.18	4.0	0.0	2.0	4.0	3.0	4.08	35.64	PD015986	-
PD015987	ML148	Cc1cccc(-n2cnc3cc(C(=O)N4CCCCC4)ccc32)c1	YQNOQZALLOQMPY-UHFFFAOYSA-N	HPGD	Homo sapiens					1													1									8.0	319.17	3.0	0.0	2.0	4.0	3.0	3.96	38.13	PD015987	-
PD015988	ML147	N#Cc1ccccc1CSc1nc2cc(Br)c[nH]c-2n1	DEYMHFHACXKPOV-UHFFFAOYSA-N	HPGD	Homo sapiens					1													1								1	4.0	343.97	4.0	1.0	3.0	3.0	1.0	3.84	65.36	PD015988	-
PD015989	ML146	C/C=C/Cn1c(SCCCc2ccccc2)nc2c1c(=O)[nH]c(=O)n2C	MGHRGGHCCMMDND-ONEGZZNKSA-N	NOD1	Homo sapiens					1													1									14.0	370.15	6.0	1.0	7.0	3.0	3.0	2.72	72.68	PD032375	-
PD015990	ML145	CC(/C=C1\SC(=S)N(CCCC(=O)Nc2ccc(C(=O)O)c(O)c2)C1=O)=C\c1ccccc1	COFMYJWNXSFLKQ-QIROLCGISA-N	GPR35	Homo sapiens					1													1								1	19.0	482.1	6.0	3.0	8.0	3.0	2.0	4.66	106.94	PD032376	-
PD015991	ML144	Cc1ccccc1N1CCN(c2ncnc3c2cnn3Cc2ccc(Cl)cc2)CC1	ODKPRIUYEYROGE-UHFFFAOYSA-N	GPR35	Homo sapiens					1													1									11.0	418.17	6.0	0.0	4.0	5.0	4.0	4.16	50.08	PD015991	-
PD015992	ML143	O=C(CSc1nc2ccccc2c(=O)n1-c1ccccc1)Nc1ccc2c(c1)CCC2	UKEAGBNVKRIELQ-UHFFFAOYSA-N		-					1													1									0.0	427.14	5.0	1.0	5.0	5.0	4.0	4.61	63.99	PD015992	-
PD015993	ML142	Brc1ccc2c(c1)CN1CCCC1=N2	IXRIYMMZXPUXNJ-UHFFFAOYSA-N		-					1													1									0.0	250.01	2.0	0.0	0.0	3.0	1.0	3.09	15.6	PD015993	-
PD015994	ML140	Cc1ccc(S(=O)(=O)NCc2ccc(C(=O)NCCN(Cc3ccccc3)C(C)C)cc2)cc1	JEJWQCTZDAJWOX-UHFFFAOYSA-N	OPRK1	Homo sapiens					1													1									6.0	479.22	4.0	2.0	11.0	3.0	3.0	4.11	78.51	PD015994	-
PD015995	ML139	O=C(c1ccccn1)N(Cc1cccs1)C1(C(=O)NC2CCCCC2)CCCCC1	FIFDVZFCMSONTO-UHFFFAOYSA-N	OPRK1	Homo sapiens					1													1									3.0	425.21	4.0	1.0	6.0	4.0	2.0	4.94	62.3	PD015995	-
PD015996	ML138	Clc1ccc(CSc2nnc(-c3ccccn3)n2Cc2ccco2)cc1Cl	QDXGAJIGONMOCL-UHFFFAOYSA-N	OPRK1	Homo sapiens					1													1									1.0	416.03	6.0	0.0	6.0	4.0	4.0	5.58	56.74	PD015996	-
PD015997	ML137	Cn1cc(-c2ccc(CN3C(=O)C(=O)c4ccccc43)c(F)c2)cn1	JCOKRGWZMBZKFO-UHFFFAOYSA-N	CHRM1	Homo sapiens					1													1									2.0	335.11	4.0	0.0	3.0	4.0	3.0	2.96	55.2	PD015997	-
PD015998	ML136	N#C/C(=C\c1cccn1S(=O)(=O)c1cccc([N+](=O)[O-])c1)S(=O)(=O)c1ccc(F)cc1	GUCUORSUHTZMBW-YBFXNURJSA-N	PPME1	Homo sapiens					1													1					1				1.0	461.02	8.0	0.0	6.0	3.0	3.0	3.11	140.14	PD032385	-
PD015999	ML135	COc1ccc(Sc2ccc(NC(=O)c3ccccc3Cl)cc2C#N)cc1	YZMLAJBOSVHFEW-UHFFFAOYSA-N	SKA	Streptococcus pyogenes serotype M1					1													1								1	13.0	394.05	4.0	1.0	5.0	3.0	3.0	5.62	62.12	PD015999	-
PD016000	ML134	CCCOc1ccc(-c2nc(OC)c3ccccc3n2)cc1	YWKHKRITRQRVIW-UHFFFAOYSA-N	SKA	Streptococcus pyogenes serotype M1					1													1									7.0	294.14	4.0	0.0	5.0	3.0	3.0	4.09	44.24	PD016000	-
PD016001	ML133	COc1ccc(CNCc2cccc3ccccc23)cc1	GIFYKGIODMXYNT-UHFFFAOYSA-N	KCNJ2	Homo sapiens					1													1									1.0	277.15	2.0	1.0	5.0	3.0	3.0	4.14	21.26	PD016001	-
PD016002	ML132	CC(C)(C)[C@H](NC(=O)c1ccc(N)c(Cl)c1)C(=O)N1CCC[C@H]1C(=O)N[C@H](C#N)CC(=O)O	KENKPOUHXLJLEY-QANKJYHBSA-N	CASP1	Homo sapiens					1													1									0.0	477.18	6.0	4.0	7.0	2.0	1.0	1.54	165.62	PD032389	-
PD016003	ML131	CCc1cccc(CC)c1NC(=O)c1ccc(-c2cc(Cl)ccc2Cl)o1	XECIGFKOOKPZGH-UHFFFAOYSA-N	S1PR4	Homo sapiens				1	1													1			1						2.0	387.08	2.0	1.0	5.0	3.0	3.0	6.63	42.24	PD016003	-
PD016004	VU 0238429	COc1ccc(CN2C(=O)C(=O)c3cc(OC(F)(F)F)ccc32)cc1	CKLGZXFOLMHCMC-UHFFFAOYSA-N	CHRM5	Homo sapiens					1											1		1									2.0	351.07	4.0	0.0	4.0	3.0	2.0	3.32	55.84	PD016004	-
PD016005	ML127	CC(=O)NC(c1cccs1)c1cc(Br)c2cccnc2c1O	FREDZQWTOHKXRX-UHFFFAOYSA-N	ALOX12	Homo sapiens					1													1									2.0	375.99	4.0	2.0	3.0	3.0	3.0	3.99	62.22	PD016005	-
PD016006	ML126	Cc1ccc(C(=O)n2c3ccccc3c3ccccc32)cc1	AWZNVFKAFFHLEY-UHFFFAOYSA-N	SKA	Streptococcus pyogenes serotype M1					1													1									4.0	285.12	2.0	0.0	1.0	4.0	4.0	4.79	22.0	PD016006	-
PD016007	ML124	CC(C)(C)c1ccc(S(=O)(=O)Nc2ccc(C(O)(C(F)(F)F)C(F)(F)F)cc2)cc1	BQNYQKAQOAPYER-UHFFFAOYSA-N	RORA	Homo sapiens					1													1									1.0	455.1	3.0	2.0	4.0	2.0	2.0	5.1	66.4	PD016007	-
PD016008	ML123	O=S(=O)(NC1CCCCC1N1CCOCC1)c1ccc(Cl)cc1	AYQCZQKMGKDZPS-UHFFFAOYSA-N	MCOLN3	Homo sapiens					1													1									3.0	358.11	4.0	1.0	4.0	3.0	1.0	2.26	58.64	PD016008	-
PD016009	ML122	Cc1ccc(N2CCN(S(=O)(=O)N3CCCCC3)CC2)c(C)c1	WPBRWZIGDANJAJ-UHFFFAOYSA-N	MCOLN3	Homo sapiens					1													1									3.0	337.18	3.0	0.0	3.0	3.0	1.0	2.16	43.86	PD016009	-
PD016010	ML121	O=c1[nH]c2c(s1)[C@@H](c1cccnc1)[C@H]1[C@@H]3CC[C@@H](C3)[C@H]1S2	RRGJAKVGOZYHOQ-XUEURGHRSA-N		-					1													1									0.0	316.07	4.0	1.0	1.0	5.0	2.0	3.48	45.75	PD032395	-
PD016011	ML120	CCOC(=O)C1=C(C)N=c2sc(=Cc3ccc(OCC(=O)O)cc3)c(=O)n2C1c1ccc(SC)cc1	RAHUOJTWCHPLKH-UHFFFAOYSA-N		-					1													1									5.0	524.11	9.0	1.0	8.0	4.0	3.0	2.98	107.19	PD016011	-
PD016012	ML119	O=C(O)c1ccccc1-c1ccc(/C=c2\sc3nc4cc(Br)cnc4n3c2=O)o1	NMLOLMOZTQCQJF-PXNMLYILSA-N		-					1													1									29.0	466.96	7.0	1.0	3.0	5.0	5.0	3.57	97.7	PD032397	-
PD016013	ML118	Cc1ccnc(NC(=O)CCCOc2cc(=O)n(C)c3ccccc23)c1	KRZBWKRPRKNWHY-UHFFFAOYSA-N	WEE1	Homo sapiens					1													1									12.0	351.16	5.0	1.0	6.0	3.0	3.0	3.04	73.22	PD016013	-
PD016014	ML117	CCn1c2ccccc2c2nnc(SCCCn3c(=O)[nH]c4ccccc43)nc21	ZVNFFJMAVRCTRS-UHFFFAOYSA-N		-					1													1									11.0	404.14	7.0	1.0	6.0	5.0	5.0	3.82	81.39	PD016014	-
PD016015	ML116	c1ccc(CC2CCN(c3ncnc4sccc34)CC2)cc1	AJQCKNBBHOVJGO-UHFFFAOYSA-N	STAT3	Homo sapiens					1													1									8.0	309.13	4.0	0.0	3.0	4.0	3.0	4.15	29.02	PD016015	-
PD016016	ML115	COc1cc(NC(=O)c2cc(C3CC3)on2)c(OC)cc1Cl	FMWABCRYNLCXOJ-UHFFFAOYSA-N	STAT3	Homo sapiens					1													1									3.0	322.07	5.0	1.0	5.0	3.0	2.0	3.47	73.59	PD016016	-
PD016017	ML114	C/C(=N\OC(=O)C1CCCCC1)c1nccs1	RRXZTDHBRAEGPA-NTEUORMPSA-N	RBBP9	Homo sapiens					1													1					1				1.0	252.09	5.0	0.0	3.0	2.0	1.0	2.99	51.55	PD037930	-
PD016018	ML113	O=C1/C(=C/c2cn(-c3ccccc3)nc2-c2ccc(OCc3ccc(Cl)cc3)cc2)SC(=S)N1CCS(=O)(=O)O	UEMVHDDFBLKUGI-XYGWBWBKSA-N	DUSP3	Homo sapiens					1													1								1	8.0	611.04	8.0	1.0	9.0	5.0	4.0	5.86	101.73	PD036266	-
PD016019	VU591	O=[N+]([O-])c1ccc2nc(COCc3nc4ccc([N+](=O)[O-])cc4[nH]3)[nH]c2c1	ZQPXNYLXYNRFNP-UHFFFAOYSA-N	KCNJ1	Homo sapiens					1													1									1.0	368.09	7.0	2.0	6.0	4.0	4.0	2.97	152.87	PD016019	-
PD016020	ML111	O=[N+]([O-])c1ccc(CN2CCOCCOCCN(Cc3ccc([N+](=O)[O-])cc3)CCOCC2)cc1	UKMHVECLTZDSBD-UHFFFAOYSA-N	KCNJ1	Homo sapiens				1	1													1			1						5.0	488.23	9.0	0.0	6.0	3.0	2.0	2.87	120.45	PD016020	-
PD016021	ML109	COc1ccc(C2Nc3cccc(O)c3C(=O)N2Cc2ccccc2)cc1COc1ccc(NC(C)=O)cc1	JRVXFGNCHKHBPA-UHFFFAOYSA-N	TSHR	Homo sapiens					1											1		1									2.0	523.21	6.0	3.0	8.0	5.0	4.0	5.7	100.13	PD016021	-
PD016022	4E1RCat	O=C(O)c1ccc(N2C(=O)/C(=C/c3ccc(-c4ccc([N+](=O)[O-])cc4)o3)C=C2c2ccccc2)cc1	BBQRBOIMSKMFFO-LTGZKZEYSA-N		-					1													1								1	24.0	478.12	5.0	1.0	6.0	5.0	4.0	6.02	113.89	PD055909	-
PD016023	ML106	c1csc(CNc2ncnc3ccc(-c4ccc5c(c4)OCO5)cc23)c1	QFBOPHGXTBOQRN-UHFFFAOYSA-N	CLK4	Homo sapiens					1													1									22.0	361.09	6.0	1.0	4.0	5.0	4.0	4.7	56.27	PD016023	-
PD016024	ML105	c1cncc(CNc2ccnc(-c3ccc4c(c3)OCO4)n2)c1	QNQZGEQPXVSUOZ-UHFFFAOYSA-N	CLK4	Homo sapiens					1													1									11.0	306.11	6.0	1.0	4.0	4.0	3.0	2.88	69.16	PD016024	-
PD016025	ML104	COc1nc(-c2ccccc2)nnc1-c1ccccc1	YPJMIXQBDVYQRG-UHFFFAOYSA-N	SMN1	Homo sapiens					1													1									7.0	263.11	4.0	0.0	3.0	3.0	3.0	3.21	47.9	PD016025	-
PD016026	ML103	Nc1scc2c(C(=O)O)nn(-c3ccccc3)c(=O)c12	XOQUOBZQPFFOSV-UHFFFAOYSA-N	MAPT	Homo sapiens					1													1									3.0	287.04	6.0	2.0	2.0	3.0	3.0	1.73	98.21	PD016026	-
PD016027	ML102	Cc1nc2ccccc2nc(=O)c1NNc1ccccc1	RWIQZKLIGWLCEK-UHFFFAOYSA-N	EGFR	Homo sapiens					1													1									8.0	278.12	5.0	2.0	3.0	3.0	3.0	2.74	66.91	PD016027	-
PD016028	ML101	CN[C@@H](C)C(=O)N[C@H](C(=O)N1CCC[C@H]1C(=O)Nc1cccc2ncccc12)C(C)C	PUQVAXDZGUENDK-YSSFQJQWSA-N	XIAP	Homo sapiens					1													1									1.0	425.24	5.0	3.0	7.0	3.0	2.0	1.91	103.43	PD032412	-
PD016029	ML100	CSc1nc(-c2ccc(C)cc2)nc(C(Cl)Cl)n1	VRYFPFHGCPTRHR-UHFFFAOYSA-N	TNFSF10	Homo sapiens					1													1									7.0	299.01	4.0	0.0	3.0	2.0	2.0	4.05	38.67	PD016029	-
PD016030	ML099	O=C(O)c1cccnc1SCCc1ccccc1	UZERZZRWECLIKE-UHFFFAOYSA-N	CDC42	Homo sapiens					1													1									6.0	259.07	3.0	1.0	5.0	2.0	2.0	3.11	50.19	PD016030	-
PD016031	ML-098	Cc1ccc(C)c(OCCn2cc(C(=O)O)c3ccccc32)c1	LILIWWFBJKBUCO-UHFFFAOYSA-N	CDC42	Homo sapiens					1													1									3.0	309.14	3.0	1.0	5.0	3.0	3.0	4.04	51.46	PD016031	-
PD016032	ML097	O=C(O)c1ccccc1OCc1ccccc1Br	IYPKPTAZUPMKGH-UHFFFAOYSA-N	CDC42	Homo sapiens					1													1									1.0	305.99	2.0	1.0	4.0	2.0	2.0	3.73	46.53	PD016032	-
PD016033	ML096	Cc1nnc(/N=c2\ssnc2Cl)o1	QXJVAZJQJDPXQL-DAXSKMNVSA-N	MPI	Homo sapiens					1													1									5.0	233.94	7.0	0.0	1.0	2.0	2.0	1.78	64.17	PD037268	-
PD016034	ML095	CCc1nccn1CC(=O)c1ccc(O)c(O)c1	KRFQWVXRVPHWCH-UHFFFAOYSA-N	ALPP	Homo sapiens					1													1									3.0	246.1	5.0	2.0	4.0	2.0	2.0	1.74	75.35	PD016034	-
PD016035	ML094	O=C(OCC#CCSc1nnc(-c2cccc3ccccc23)o1)c1ccc(F)cc1	BZGQMGJZXODGJM-UHFFFAOYSA-N	ALOX15	Homo sapiens					1													1									1.0	418.08	6.0	0.0	5.0	4.0	4.0	4.98	65.22	PD016035	-
PD016036	PHENETHYLAMINE	NCCc1ccccc1	BHHGXPLMPWCGHP-UHFFFAOYSA-N	TAAR1	Homo sapiens					1								1					1									9.0	121.09	1.0	1.0	2.0	1.0	1.0	1.19	26.02	PD016036	-
PD016037	ML092	CCn1cnc2c(Nc3cc(F)cc(F)c3)nc(C#N)nc21	SZYYBVWPURUFRR-UHFFFAOYSA-N		-					1													1									16.0	300.09	6.0	1.0	3.0	3.0	3.0	2.74	79.42	PD016037	-
PD016038	ML091	O=C(CNC(=O)C1CCCCC1)OC(C(=O)c1ccccc1)c1ccccc1	XUWBMGZNJBLYOF-UHFFFAOYSA-N		-					1													1									1.0	379.18	4.0	1.0	7.0	3.0	2.0	3.85	72.47	PD016038	-
PD016039	ML090	c1ccc2c(c1)Nc1nc3ccccc3nc1N2	WGKYYZDYHYOKQV-UHFFFAOYSA-N	NOX1	Homo sapiens					1													1									1.0	234.09	4.0	2.0	0.0	4.0	3.0	3.43	49.84	PD016039	-
PD016040	ML089	O=c1c2cc(F)ccc2sn1-c1ccccc1	ZTQXZKHEMCRFEP-UHFFFAOYSA-N	MPI	Homo sapiens					1											1		1									7.0	245.03	3.0	0.0	1.0	3.0	3.0	3.19	22.0	PD016040	-
PD016041	ML088	Cc1cc(OCC(=O)Nc2nc[nH]n2)ccc1Cl	DDSVUTNMKCJKGE-UHFFFAOYSA-N	ALPL	Homo sapiens					1													1									4.0	266.06	4.0	2.0	4.0	2.0	2.0	1.78	79.9	PD016041	-
PD016042	ML087	C=CCN1C(=O)/C(=N\Nc2ccccc2O)c2ccccc21	AWQSKLYWVWEYKB-MNDPQUGUSA-N	ALPL	Homo sapiens					1													1								1	5.0	293.12	4.0	2.0	4.0	3.0	2.0	2.74	64.93	PD032425	-
PD016043	ML086	CN(C)C(=O)c1cccc(-n2sc3ccccc3c2=O)c1	TUPPZGFKINLCEX-UHFFFAOYSA-N	PHOSPHO1	Homo sapiens					1													1									3.0	298.08	4.0	0.0	2.0	3.0	3.0	2.75	42.31	PD016043	-
PD016044	ML085	C=CCn1c(SCC(=O)c2ccc(O)c(O)c2)nnc1-c1ccccc1OC	HDLQKEKTQTTWGA-UHFFFAOYSA-N	ALPP	Homo sapiens					1													1									12.0	397.11	8.0	2.0	8.0	3.0	3.0	3.53	97.47	PD016044	-
PD016045	Exo1	COC(=O)c1ccccc1NC(=O)c1ccc(F)cc1	KIAPWMKFHIKQOZ-UHFFFAOYSA-N		-					1											1		1									4.0	273.08	3.0	1.0	3.0	2.0	2.0	2.86	55.4	PD016045	-
PD016046	ML080	N#Cc1ccc(Nc2nc(-c3ccc(O)cc3O)cs2)cc1C(F)(F)F	KZWUKANMYHSJLO-UHFFFAOYSA-N	VCP	Homo sapiens					1													1									2.0	377.04	6.0	3.0	3.0	3.0	3.0	4.86	89.17	PD016046	-
PD016047	ML079	COc1ccc(C2c3c(ncn(CCN4CCOCC4)c3=N)Oc3ccc4ccccc4c32)cc1OC	HTAQOIIMDZRODK-UHFFFAOYSA-N	NPSR1	Homo sapiens					1													1									9.0	498.23	8.0	1.0	6.0	6.0	4.0	4.15	81.83	PD016047	-
PD016048	ML078	Cc1sc(NC(=O)CSc2nccc(-c3ccc(Cl)cc3)n2)c(C#N)c1-c1ccc(F)cc1	DEJQTDMFNULSLV-UHFFFAOYSA-N	BAP1	Homo sapiens					1													1									0.0	494.04	6.0	1.0	6.0	4.0	4.0	6.58	78.67	PD016048	-
PD016049	ML077	Cc1csc(N(C)C(=O)CSc2ccc(-c3ccccc3)nn2)n1	POKKSIROKFEGGD-UHFFFAOYSA-N	SLC12A5	Homo sapiens					1													1									2.0	356.08	6.0	0.0	5.0	3.0	3.0	3.66	58.98	PD016049	-
PD016050	ML076	O=C(NCc1cccc2ccsc12)c1cccs1	CFBONDGWZILACS-UHFFFAOYSA-N		-					1													1									0.0	273.03	3.0	1.0	3.0	3.0	3.0	3.89	29.1	PD016050	-
PD016051	SF 11	CCOc1ccc(NC(=S)N2CCC(C(O)(c3ccccc3)c3ccccc3)CC2)cc1	PMEQBGAGFZDWQX-UHFFFAOYSA-N	NPY2R	Homo sapiens				1	1													1			1						6.0	446.2	3.0	2.0	6.0	4.0	3.0	5.43	44.73	PD016051	-
PD016052	ML074	Cc1ccc(C)c(NS(=O)(=O)c2cc(C(=O)Nc3ccccc3-c3ccccc3)ccc2Cl)c1	ZQJTYJZLKBRKPC-UHFFFAOYSA-N	NPY2R	Homo sapiens					1													1								1	8.0	490.11	3.0	2.0	6.0	4.0	4.0	6.68	75.27	PD016052	-
PD016053	ML073	COc1cccc(-c2nc(-c3ccc(NC(=O)Cc4ccccc4OC)cc3)no2)c1	FCERKWLJIGNRPV-UHFFFAOYSA-N	NPY2R	Homo sapiens					1													1									6.0	415.15	6.0	1.0	7.0	4.0	4.0	4.6	86.48	PD016053	-
PD016054	ML072	Cc1ccc(S(=O)(=O)C(c2ccccc2)c2c(C)noc2C)cc1	ZEKHPEYYOIKDQJ-UHFFFAOYSA-N	NPY2R	Homo sapiens					1													1									2.0	341.11	4.0	0.0	4.0	3.0	3.0	4.16	60.17	PD016054	-
PD016056	ML070	CCN(CC)CCCCCNc1cc(O)cc2cccnc12	QCFWRPRHNQZRFT-UHFFFAOYSA-N		-					1													1									2.0	301.22	4.0	2.0	9.0	2.0	2.0	3.86	48.39	PD016056	-
PD016057	ML069	CC(=O)[C@@]1(O)Cc2c(O)c3c(c(O)c2[C@H](O[C@H]2C[C@H](N)[C@H](O)[C@H](C)O2)C1)C(=O)c1ccccc1C3=O	XDXDZDZNSLXDNA-LGVQOGFTSA-N		-					1													1								1	18.0	497.17	10.0	5.0	3.0	5.0	2.0	1.02	176.61	PD004105	-
PD016058	ML067	O=C(COC(=O)C12CC3CC(CC(C3)C1)C2)NCc1ccco1	MOSOSUPDUHNNDQ-UHFFFAOYSA-N		-					1													1									6.0	317.16	4.0	1.0	5.0	5.0	1.0	2.66	68.54	PD016058	-
PD016059	ML066	CC(C)C(=O)NC(c1ccco1)c1ccc2cccnc2c1O	PBZYAPZLINAHET-UHFFFAOYSA-N		-					1											1		1									14.0	310.13	4.0	2.0	4.0	3.0	3.0	3.4	75.36	PD016059	-
PD016060	ML065	O=C(CSc1cccc2cccnc12)N1CCCC1	RQGNWRSISVFFMW-UHFFFAOYSA-N		-					1													1									8.0	272.1	3.0	0.0	3.0	3.0	2.0	2.95	33.2	PD016060	-
PD016061	ML064	CN1CSC(=S)N(C)C1	QAYICIQNSGETAS-UHFFFAOYSA-N		-					1													1									4.0	162.03	3.0	0.0	0.0	1.0	0.0	0.8	6.48	PD016061	-
PD016062	ML063	O=S1(=O)Nc2c(ccc3cccnc23)-c2ccccc21	CYSOFAOLQAYKGU-UHFFFAOYSA-N		-					1													1									21.0	282.05	3.0	1.0	0.0	4.0	3.0	3.02	59.06	PD016062	-
PD016063	ML060	CCCc1nc2c(=O)n(C)c(=O)nc-2n(C)n1	LKBYYUZEKINDPS-UHFFFAOYSA-N		-					1												1	1								1	30.0	235.11	7.0	0.0	2.0	2.0	0.0	-0.67	82.67	PD016063	-
PD016064	ML059	CCN1CCN(c2nc3ccccc3nc2C(C#N)C(=O)OC2CCCCC2)CC1	KKTOITAISCXMHG-UHFFFAOYSA-N		-					1													1									13.0	407.23	7.0	0.0	5.0	4.0	2.0	3.25	82.35	PD016064	-
PD016065	ML058	CC(C)(C)C1CCc2onc(C(=O)Nc3cnn(Cc4ccc(I)cc4)c3)c2C1	ZMOJYLVLTQIZSY-UHFFFAOYSA-N		-					1													1									1.0	504.1	5.0	1.0	4.0	4.0	3.0	4.93	72.95	PD016065	-
PD016066	ML057	O=C(c1ccccc1-n1sc2ccccc2c1=O)N1CCCC1	JYBZNJNYORJZAD-UHFFFAOYSA-N		-					1													1									0.0	324.09	4.0	0.0	2.0	4.0	3.0	3.29	42.31	PD016066	-
PD016067	W146	CCCCCCc1cccc(NC(=O)[C@H](N)CCP(=O)(O)O)c1	FWJRVGZWNDOOFH-OAHLLOKOSA-N	S1PR1	Homo sapiens					1								1					1									1.0	342.17	3.0	4.0	10.0	1.0	1.0	2.64	112.65	PD023884	-
PD016068	ML055	Cc1cc(C)nc(/N=C(/N)Nc2cccc(N)c2)n1	XGQAWNOUOJVCQF-UHFFFAOYSA-N		-					1													1									1.0	256.14	4.0	3.0	2.0	2.0	2.0	1.73	102.21	PD016068	-
PD016069	ML053	CC1CCCN(C(C(=O)Nc2ccc3c(c2)OCCO3)c2ccccc2)C1	ZPVUAOURUGLWNO-UHFFFAOYSA-N		-					1													1									8.0	366.19	4.0	1.0	4.0	4.0	2.0	3.87	50.8	PD016069	-
PD016070	ML052	CCCN(CCC)CCNC(=O)C1CCN(Cc2nc(-c3ccc(Cl)cc3)oc2C)CC1	DJAFUYUUNCOPGL-UHFFFAOYSA-N		-					1													1									0.0	460.26	5.0	1.0	11.0	3.0	2.0	4.75	61.61	PD016070	-
PD016071	phenylethanolamine	NCC(O)c1ccccc1	ULSIYEODSMZIPX-UHFFFAOYSA-N		-					1													1		1							0.0	137.08	2.0	2.0	2.0	1.0	1.0	0.68	46.25	PD016071	-
PD016072	ML048	CCc1cc2c(=O)c(-c3nc4ccccc4n3C)c(C)oc2cc1OC(C)=O	HTTVYKXJCQENKW-UHFFFAOYSA-N	FPR1	Homo sapiens					1													1									1.0	376.14	6.0	0.0	3.0	4.0	4.0	4.14	74.33	PD016072	-
PD016073	ML047	COc1ccc(-c2cn3cccnc3n2)cc1NC(=O)C(C)C	XRYOQOUJMQVCBW-UHFFFAOYSA-N	FPR2	Homo sapiens					1													1									1.0	310.14	5.0	1.0	4.0	3.0	3.0	3.0	68.52	PD016073	-
PD016074	ML046	CCOC(=O)c1cc(C)[cH-]c1C.O=C1NC(=O)c2c1c1c3ccccc3cnc1c1[n-]c3ccccc3c21.[C-]#[O+].[Ru+2]	IUXSMRBWRVAPRT-UHFFFAOYSA-M		-					1													1									0.0	631.07	5.0	1.0	2.0	7.0	6.0	5.69	119.36	PD016074	-
PD016075	ML045	Oc1ccc(CCNc2ncnc3ccc(Cl)cc23)cc1	MZQYEXKXFXQJMD-UHFFFAOYSA-N		-					1													1									4.0	299.08	4.0	2.0	4.0	3.0	3.0	3.64	58.04	PD016075	-
PD016076	ML043	COc1ccccc1N(/N=C1\Sc2ccccc2C1=O)C(C)=O	QYEYTJAHIFEBPH-ZCXUNETKSA-N	PLK1	Homo sapiens					1													1								1	11.0	326.07	5.0	0.0	3.0	3.0	2.0	3.35	58.97	PD032456	-
PD016077	ML042	CCOC(=O)CS(=O)(=O)c1nc(-c2ccc(F)cc2)cc(C(F)(F)F)n1	YSZZSESTGDKXTF-UHFFFAOYSA-N	BCL2A1	Homo sapiens					1													1									20.0	392.05	6.0	0.0	5.0	2.0	2.0	2.64	86.22	PD016077	-
PD016078	ML041	CN(C)C1=C(Cl)C(=O)N(c2ccc(Cl)c(Cl)c2)C1=O	UJVSRUOVYSHYAG-UHFFFAOYSA-N	BCL2A1	Homo sapiens					1													1									3.0	317.97	3.0	0.0	2.0	2.0	1.0	2.88	40.62	PD016078	-
PD016079	ML344	CCn1nnnc1NCc1ccc(C(C)C)cc1	KTDWVPGNCOUOEH-UHFFFAOYSA-N		-					1													1									0.0	245.16	5.0	1.0	5.0	2.0	2.0	2.43	55.63	PD016079	-
PD016080	ML343	O=C(Cc1ccc(-c2ccccc2)cc1)NC1CCC1	ZAMVIMIKYOABNX-UHFFFAOYSA-N		-					1													1									0.0	265.15	1.0	1.0	4.0	3.0	2.0	3.56	29.1	PD016080	-
PD016081	ML342	Cc1ccc(S(=O)(=O)N(C)CC(=O)N2CCN(c3ccccn3)CC2)cc1	AVFZKEVCVCSCJE-UHFFFAOYSA-N	ADRB2	Homo sapiens					1													1									3.0	388.16	5.0	0.0	5.0	3.0	2.0	1.36	73.82	PD016081	-
PD016082	ML341	C[C@H]1CN([C@@H](C)CO)C(=O)c2cccc(NC(=O)c3ccncc3)c2O[C@@H]1CN(C)Cc1ccc(Oc2ccccc2)cc1	ACSVFUACEODJDN-PNRGXICFSA-N		-					1													1									0.0	594.28	7.0	2.0	10.0	5.0	4.0	5.48	104.23	PD032508	-
PD016083	ML340	CC1CCN(c2cc(NC(=O)c3ccccc3)ncn2)CC1	QUWAUKDDNKSIJN-UHFFFAOYSA-N	GLI1	Homo sapiens					1													1									1.0	296.16	4.0	1.0	3.0	3.0	2.0	2.97	58.12	PD016083	-
PD016084	ML339	COc1cc(C(=O)NC2CC3CCCC(C2)N3CC(=O)Nc2ccccc2Cl)cc(OC)c1OC	SSPYAPRDKNCABY-UHFFFAOYSA-N		-					1													1									0.0	501.2	6.0	2.0	8.0	4.0	2.0	4.12	89.13	PD016084	-
PD016085	ML338	Clc1ccc(-c2nnc(SCc3cn(-c4ccccc4)nn3)o2)cc1	GMRWWIAYZWSOAZ-UHFFFAOYSA-N		-					1													1									0.0	369.05	7.0	0.0	5.0	4.0	4.0	4.26	69.63	PD016085	-
PD016086	ML040	Cc1ccc(C)n1-c1ccc(C(=O)O)c(O)c1	WAYCNXGAKFXIKA-UHFFFAOYSA-N	EPHA4	Homo sapiens					1													1									8.0	231.09	3.0	2.0	2.0	2.0	2.0	2.5	62.46	PD016086	-
PD016087	ML039	O=C(NCCO)c1cc(-c2ccc(Cl)c(Cl)c2Cl)n[nH]1	NQORNRXANZIMLI-UHFFFAOYSA-N	ALPL	Homo sapiens					1													1									1.0	332.98	3.0	3.0	4.0	2.0	2.0	2.76	78.01	PD016087	-
PD016088	ML038	O=C1C2CC=CCC2C(=O)N1c1n[nH]c(-c2ccccc2)n1	MIQGMTKINBACMG-UHFFFAOYSA-N	ALPL	Homo sapiens					1													1									2.0	294.11	4.0	1.0	2.0	4.0	2.0	1.93	78.95	PD016088	-
PD016089	ML037	CCN(CC)c1ccc(C2Nc3ccccc3NC3=C2C(=O)CC(c2ccccc2)C3)cc1	AGQNVTZMIXEHKC-UHFFFAOYSA-N		-					1													1								1	0.0	437.25	4.0	2.0	5.0	5.0	3.0	6.51	44.37	PD016089	-
PD016090	ML036	CC(C)(C)OC(=O)N[C@@H](Cc1c[nH]c2ccccc12)C(=O)NNC(=O)OCC(=O)N1CCCc2ccccc21	MITOFRSPGLYHSJ-QFIPXVFZSA-N	CTSL	Homo sapiens					1													1									1.0	535.24	6.0	4.0	6.0	4.0	3.0	3.34	141.86	PD032463	-
PD016091	ML035	Cc1ccc2c(c1)-c1ccc3cccnc3c1NS2(=O)=O	KYPLTYNYSYVGGA-UHFFFAOYSA-N		-					1													1									3.0	296.06	3.0	1.0	0.0	4.0	3.0	3.32	59.06	PD016091	-
PD016092	ML034	O=C(O)CCC(NS(=O)(=O)c1ccc(-c2ccccc2)cc1)C(=O)O	IQGHPUPMOUUHPP-UHFFFAOYSA-N	MMP8	Homo sapiens					1													1									3.0	363.08	4.0	3.0	8.0	2.0	2.0	1.95	120.77	PD016092	-
PD016093	ML033	O=c1nc(SCc2ccc(Cl)cc2)[nH]c2c1CCC2	HKDAECHYHSQLRG-UHFFFAOYSA-N	MMP13	Homo sapiens					1													1									7.0	292.04	3.0	1.0	3.0	3.0	2.0	3.2	45.75	PD016093	-
PD016094	ML032	COc1ccc(CSc2nc(=O)cc(C)[nH]2)cc1	XMFWHLZTTUUQHL-UHFFFAOYSA-N	MMP13	Homo sapiens					1													1									4.0	262.08	4.0	1.0	4.0	2.0	2.0	2.38	54.98	PD016094	-
PD016095	ML028	COc1ccc(OC)c(S(=O)(=O)Nc2cnc3ccccc3c2)c1	JZSPHTPWUXNQGB-UHFFFAOYSA-N	ALPL	Homo sapiens					1											1		1									3.0	344.08	5.0	1.0	5.0	3.0	3.0	3.05	77.52	PD016095	-
PD016096	ML025	CC(C)(C)OC(=O)NCCc1nnc(S(=O)(=O)Cc2ccc(Cl)cc2Cl)o1	KTPSEIKHZBDCBJ-UHFFFAOYSA-N		-					1													1									18.0	435.04	7.0	1.0	6.0	2.0	2.0	3.42	111.39	PD016096	-
PD016097	ML024	COc1ccc(S(=O)(=O)n2nc(OC(=O)c3ccccc3)cc2N)cc1	FQICFDBMQBCJDT-UHFFFAOYSA-N		-					1													1									11.0	373.07	8.0	1.0	5.0	3.0	3.0	1.93	113.51	PD016097	-
PD016098	ML023	CCc1ccccc1NC(=O)CSC(=O)NNC(=O)[C@H](Cc1c[nH]c2ccccc12)NC(=O)OC(C)(C)C	OTIWAYTTYNFEKL-QFIPXVFZSA-N	CTSL	Homo sapiens					1													1									1.0	539.22	6.0	5.0	8.0	3.0	3.0	4.28	141.42	PD118456	-
PD016099	ML022	CC(C)c1ccc(SCC(=O)N2CCOCC2)cc1	ATHBYWJACADYGI-UHFFFAOYSA-N		-					1													1									0.0	279.13	3.0	0.0	4.0	2.0	1.0	2.76	29.54	PD016099	-
PD016100	ML021	CCCCCC[n+]1ccccc1/C=C/c1ccc(N(C)C)cc1	OQPXCZGFVBKXJK-UHFFFAOYSA-N	TLR4	Homo sapiens					1													1								1	0.0	309.23	1.0	0.0	8.0	2.0	2.0	4.79	7.12	PD016100	-
PD016101	ML020	Cn1nc(C(F)(F)F)cc1C(=O)Nc1ccc(S(=O)(=O)N2CCCCC2)cc1	OJDLQNVQEAZKSL-UHFFFAOYSA-N		-					1													1									0.0	416.11	5.0	1.0	4.0	3.0	2.0	2.87	84.3	PD016101	-
PD016102	SID 7969543	CCOC(=O)C(C)Oc1cccc2c(=O)n(CC(=O)Nc3ccc4c(c3)OCCO4)ccc12	KWMBIIQCLUIHDI-UHFFFAOYSA-N	NR5A1	Homo sapiens					1											1		1								1	6.0	452.16	8.0	1.0	7.0	4.0	3.0	2.74	105.09	PD016102	-
PD016103	ML018	CCCCOc1cccc2c(=O)n(CC(=O)Nc3ccc4c(c3)OCCO4)ccc12	TWUUAAGXROMAKI-UHFFFAOYSA-N	NR5A1	Homo sapiens					1													1									3.0	408.17	6.0	1.0	7.0	4.0	3.0	3.59	78.79	PD016103	-
PD016104	ML017	CCOC(=O)C(C)Oc1cccc2c(=O)n(CC(=O)Nc3ccc(OC)cc3)ccc12	CFQXBSFRUQKYQA-UHFFFAOYSA-N	NR5A1	Homo sapiens					1													1									1.0	424.16	7.0	1.0	8.0	3.0	3.0	2.98	95.86	PD016104	-
PD016105	ML016	CC(=O)C(C(C)=O)c1c(Cl)c(O)c(O)c2c(C(=O)c3ccccc3)coc12	IIXFNJQVQREYEM-UHFFFAOYSA-N		-					1													1								1	23.0	386.06	6.0	2.0	5.0	3.0	3.0	3.99	104.81	PD016105	-
PD016106	Indirubin-3'-monoxime	O=C1N=c2ccccc2=C1c1[nH]c2ccccc2c1NO	LDEWQRSYYHTQRA-UHFFFAOYSA-N	GSK3B	Homo sapiens					1													1									5.0	277.09	3.0	3.0	2.0	4.0	3.0	1.33	77.48	PD016106	-
PD016107	ML014	O=C(C(O)c1ccc(Br)cc1)N1CCC(Nc2ccc3[nH]ncc3c2)CC1	NQYWUAZXGFMIIN-UHFFFAOYSA-N	ROCK2	Homo sapiens					1				1									1	1								2.0	428.08	4.0	3.0	4.0	4.0	3.0	3.46	81.25	PD016107	-
PD016108	ML013	Cc1nc(SCc2nc3ccccc3[nH]2)c2oc3ccccc3c2n1	FSHFRKKIBVABAJ-UHFFFAOYSA-N	CREBBP	Homo sapiens					1													1									7.0	346.09	5.0	1.0	3.0	5.0	5.0	4.85	67.6	PD016108	-
PD016109	ML012	O=C(CCNS(=O)(=O)c1cccc2nsnc12)N1CCN(c2ccccn2)CC1	PAUICUBCWHEEDI-UHFFFAOYSA-N	CHRM1	Homo sapiens					1													1									1.0	432.1	8.0	1.0	6.0	4.0	3.0	1.1	108.39	PD016109	-
PD016110	ML010	CC(C)(C)Oc1ccccc1Nc1nc(NCCO)nc(N2CCCC2)n1	YLYZGVPSUIZOCY-UHFFFAOYSA-N	GBA	Homo sapiens					1													1									1.0	372.23	8.0	3.0	7.0	3.0	2.0	2.8	95.43	PD016110	-
PD016111	ML009	CCc1nnc(NC(=O)c2ccc(NS(=O)(=O)c3ccccc3)cc2)s1	YMGXUJCEBOCIIT-UHFFFAOYSA-N	GBA	Homo sapiens					1													1									7.0	388.07	6.0	2.0	6.0	3.0	3.0	3.15	101.05	PD016111	-
PD016112	ML008	Cc1cc(N2CCOCC2)nc2ccc(NC(=O)C3CCCCC3)cc12	BXVNPOBNVRBOOV-UHFFFAOYSA-N	GBA	Homo sapiens					1											1		1									2.0	353.21	4.0	1.0	3.0	4.0	2.0	3.9	54.46	PD016112	-
PD016113	ML007	CCOc1ccc(-c2nc(-c3ccncc3)no2)cc1OCC	MMKXHTDCKLZHIM-UHFFFAOYSA-N	S1PR1	Homo sapiens					1													1									4.0	311.13	6.0	0.0	6.0	3.0	3.0	3.6	70.27	PD016113	-
PD016114	ML005	Cc1cc(C)n(-c2nc(NCCCO)c3c4c(sc3n2)CCCC4)n1	WEAXENWHNHWGBP-UHFFFAOYSA-N	S1PR3	Homo sapiens					1													1									13.0	357.16	7.0	2.0	5.0	4.0	3.0	3.17	75.86	PD016114	-
PD016115	ML004	CCCc1cc(C(=O)N(C2CCCCC2)C2CCCCC2)no1	XTUSMJNHGPASSE-UHFFFAOYSA-N	S1PR3	Homo sapiens					1													1									6.0	318.23	3.0	0.0	5.0	3.0	1.0	4.73	46.34	PD016115	-
PD016116	ML003	Cc1cc(C)nc(-n2nc(C)c(Sc3ccc(F)cc3)c2N)n1	UHKSHIBWGZYKCL-UHFFFAOYSA-N	S1PR3	Homo sapiens					1													1									8.0	329.11	6.0	1.0	3.0	3.0	3.0	3.46	69.62	PD016116	-
PD016117	ML001	CN(C)c1oc(-c2ccc(OCc3ccc(Cl)cc3)cc2)nc1C#N	CMVJGSUPZYIDHO-UHFFFAOYSA-N	PYK	Geobacillus stearothermophilus					1													1									9.0	353.09	5.0	0.0	5.0	3.0	3.0	4.51	62.29	PD016117	-
PD016151	EDOTECARIN	O=C1c2c(c3c4ccc(O)cc4n([C@@H]4O[C@H](CO)[C@@H](O)[C@H](O)[C@H]4O)c3c3[nH]c4cc(O)ccc4c23)C(=O)N1NC(CO)CO	QMVPQBFHUJZJCS-NTKFZFFISA-N	TOP1	Homo sapiens									1										1		1						1.0	608.18	13.0	10.0	6.0	7.0	5.0	-0.73	241.2	PD074731	1
PD074731	EDOTECARIN	O=C1c2c(c3c4ccc(O)cc4n(C4OC(CO)C(O)C(O)C4O)c3c3[nH]c4cc(O)ccc4c23)C(=O)N1NC(CO)CO	QMVPQBFHUJZJCS-UHFFFAOYSA-N	TOP1	Homo sapiens									1										1								2.0	608.18	13.0	10.0	6.0	7.0	5.0	-0.73	241.2	PD074731	1
PD082415	PD082415	O=C1c2c(c3c4ccc(O)cc4n([C@@H]4O[C@H](CO)[C@@H](O)[C@@H](O)[C@H]4O)c3c3[nH]c4cc(O)ccc4c23)C(=O)N1NC(CO)CO	QMVPQBFHUJZJCS-LVKSHERESA-N	TOP1	Homo sapiens									1										1								2.0	608.18	13.0	10.0	6.0	7.0	5.0	-0.73	241.2	PD074731	1
PD084572	PD084572	O=C1c2c(c3c4ccc(O)cc4n([C@H]4O[C@H](CO)[C@@H](O)[C@H](O)[C@@H]4O)c3c3[nH]c4cc(O)ccc4c23)C(=O)N1NC(CO)CO	QMVPQBFHUJZJCS-ZFRQTDAFSA-N	TOP1	Homo sapiens									1										1								2.0	608.18	13.0	10.0	6.0	7.0	5.0	-0.73	241.2	PD074731	1
PD085306	PD085306	O=C1c2c(c3c4ccc(O)cc4n([C@H]4O[C@H](CO)[C@@H](O)[C@@H](O)[C@H]4O)c3c3[nH]c4cc(O)ccc4c23)C(=O)N1NC(CO)CO	QMVPQBFHUJZJCS-UZHYHRDUSA-N	TOP1	Homo sapiens									1										1								2.0	608.18	13.0	10.0	6.0	7.0	5.0	-0.73	241.2	PD074731	1
PD016356	SB590885	CN(C)CCOc1ccc(-c2nc(-c3ccncc3)c(-c3ccc4c(c3)CC/C4=N\O)[nH]2)cc1	MLSAQOINCGAULQ-QFMPWRQOSA-N	RAF1	Homo sapiens									1										1								2.0	453.22	6.0	2.0	7.0	5.0	4.0	4.87	86.63	PD033240	-
PD016363	JZP 361	O=C(N1CCC(=C2c3ccc(Cl)cc3CCc3cccnc32)CC1)n1cncn1	GAVZCGTYRWKKDV-UHFFFAOYSA-N	MGLL	Homo sapiens												1							1								4.0	405.14	5.0	0.0	0.0	5.0	3.0	3.99	63.91	PD016363	-
PD016377	GSK2033	Cc1cc(C)c(S(=O)(=O)N(Cc2ccc(-c3cccc(S(C)(=O)=O)c3)cc2)Cc2ccc(C(F)(F)F)o2)c(C)c1	PSOXOVKYGWBTPB-UHFFFAOYSA-N	NR1H2,NR1H3;NR1H2;NR1H3	Homo sapiens		1														1		1									2.0	591.14	5.0	0.0	8.0	4.0	4.0	6.69	84.66	PD016377	-
PD016379	Mps1-IN-2	CCOc1cc(N2CCC(O)CC2)ccc1Nc1ncc2c(n1)N(C1CCCC1)CCC(=O)N2C	WELBJLUKWAJOQV-UHFFFAOYSA-N	TTK	Homo sapiens			1	1														1									2.0	480.28	8.0	2.0	6.0	5.0	2.0	3.7	94.06	PD016379	-
PD016411	AZD8797	CC(C)C[C@H](CO)Nc1nc(S[C@@H](C)c2ccccc2)nc2nc(N)sc12	ZMQSLMZOWVGBSM-GXTWGEPZSA-N	CX3CR1	Homo sapiens												1							1		1						3.0	403.15	8.0	3.0	8.0	3.0	3.0	4.34	96.95	PD033313	-
PD016454	TUG-891	Cc1ccc(-c2ccc(F)cc2COc2ccc(CCC(=O)O)cc2)cc1	LPGBXHWIQNZEJB-UHFFFAOYSA-N	FFAR4	Homo sapiens		1											1					1									2.0	364.15	2.0	1.0	7.0	3.0	3.0	5.4	46.53	PD016454	-
PD016573	UNC0646	COc1cc2c(NC3CCN(C4CCCCC4)CC3)nc(N3CCCN(C(C)C)CC3)nc2cc1OCCCN1CCCCC1	OUKWLRHRXOPODD-UHFFFAOYSA-N	EHMT2	Homo sapiens									1			1							1		1						1.0	621.47	9.0	1.0	11.0	6.0	2.0	6.02	69.23	PD016573	-
PD016611	ibipinabant	C/N=C(\NS(=O)(=O)c1ccc(Cl)cc1)N1C[C@H](c2ccccc2)C(c2ccc(Cl)cc2)=N1	AXJQVVLKUYCICH-OAQYLSRUSA-N	CNR1	Homo sapiens												1							1		1						2.0	486.07	4.0	1.0	4.0	4.0	3.0	4.76	74.13	PD016610	-
PD016629	M 24	CCCCOC(=O)NS(=O)(=O)c1sc(CC(C)C)cc1-c1ccc(Cn2ccnc2)cc1	XTEOJPUYZWEXFI-UHFFFAOYSA-N	AGTR2	Homo sapiens												1	1						1								3.0	475.16	7.0	1.0	10.0	3.0	3.0	5.07	90.29	PD016629	-
PD016646	PHA 408	CN1CCN(c2cc(C(=O)Nc3ccc4c(c3)-c3c(c(C(N)=O)nn3-c3ccc(F)cc3)CC4)c(Cl)cn2)CC1	ZLEZHGHFWIHCGU-UHFFFAOYSA-N	IKBKB	Homo sapiens									1										1								2.0	559.19	7.0	2.0	5.0	6.0	4.0	3.93	109.38	PD016646	-
PD016651	GSK 461364 analogue II	C[C@@H](Oc1cc(-n2cnc3ccc(OC4CCN(C)CC4)cc32)sc1C(N)=O)c1ccccc1C(F)(F)F	SWIVJTVGOIXUKC-MRXNPFEDSA-N	PLK1	Homo sapiens									1										1		1						9.0	544.18	7.0	1.0	7.0	5.0	4.0	5.82	82.61	PD033444	-
PD016658	Kinome_3819	CC(C)Oc1cc(Nc2nc(N[C@@H](C)c3ccc(F)cn3)ncc2Cl)n[nH]1	LBVKEEFIPBQIMD-JTQLQIEISA-N	NTRK1,NTRK2;NTRK1;NTRK2	Homo sapiens		1																1									6.0	391.13	7.0	3.0	7.0	3.0	3.0	4.09	100.64	PD046644	-
PD016731	LUZINDOLE	CC(=O)NCCc1c(Cc2ccccc2)[nH]c2ccccc12	WVVXBPKOIZGVNS-UHFFFAOYSA-N	MTNR1B	Homo sapiens				1					1							1			1		1						10.0	292.16	1.0	2.0	5.0	3.0	3.0	3.44	44.89	PD016731	-
PD016768	SCH 58261	Nc1nc2c(cnn2CCc2ccccc2)c2nc(-c3ccco3)nn12	UTLPKQYUXOEJIL-UHFFFAOYSA-N	ADORA2A	Homo sapiens												1							1		1						16.0	345.13	8.0	1.0	4.0	5.0	5.0	2.56	100.06	PD016768	-
PD016776	COMBRETASTATIN A4	COc1ccc(/C=C\c2cc(OC)c(OC)c(OC)c2)cc1O	HVXBOLULGPECHP-WAYWQWQTSA-N	ABCB1	Homo sapiens									1				1			1	1		1							1	16.0	316.13	5.0	1.0	6.0	2.0	2.0	3.6	57.15	PD056817	-
PD016781	AM281	Cc1c(C(=O)NN2CCOCC2)nn(-c2ccc(Cl)cc2Cl)c1-c1ccc(I)cc1	AJFFBPZYXRNAIC-UHFFFAOYSA-N	CNR1	Homo sapiens												1	1			1			1								12.0	555.99	5.0	1.0	4.0	4.0	3.0	4.74	59.39	PD016781	-
PD016831	meclinertant	COc1cccc(OC)c1-c1cc(C(=O)NC2(C(=O)O)C3CC4CC(C3)CC2C4)nn1-c1ccnc2cc(Cl)ccc12	DYLJVOXRWLXDIG-UHFFFAOYSA-N	NTSR1	Homo sapiens				1					1			1	1			1			1		1						4.0	586.2	7.0	2.0	7.0	8.0	4.0	5.77	115.57	PD016831	-
PD016966	PF-CBP1	CCCOc1ccc(CCc2nc3cc(-c4c(C)noc4C)ccc3n2CCN2CCOCC2)cc1	CGWBJJZOKGZCSJ-UHFFFAOYSA-N	EP300	Homo sapiens		1		1												1		1									5.0	488.28	7.0	0.0	10.0	5.0	4.0	5.21	65.55	PD016966	-
PD016970	SB 218078	O=C1NC(=O)c2c1c1c3ccccc3n3c1c1c2c2ccccc2n1C1CCC3O1	OTPNDVKVEAIXTI-UHFFFAOYSA-N	CHEK1	Homo sapiens									1										1								5.0	393.11	5.0	1.0	0.0	8.0	5.0	4.61	65.26	PD016970	-
PD017002	SCH772984	O=C(Nc1ccc2[nH]nc(-c3ccncc3)c2c1)[C@@H]1CCN(CC(=O)N2CCN(c3ccc(-c4ncccn4)cc3)CC2)C1	HDAJDNHIBCDLQF-RUZDIDTESA-N	MAPK3;MAPK1;MAPK1,MAPK3	Homo sapiens		1		1								1			1			1	1		1						4.0	587.28	8.0	2.0	7.0	7.0	5.0	3.69	123.24	PD003258	-
PD017240	Dihydroxymethoxychalcone	COc1cc(O)cc(O)c1C(=O)/C=C/c1ccccc1	NYSZJNUIVUBQMM-BQYQJAHWSA-N	KCNA3	Homo sapiens												1							1		1						6.0	270.09	4.0	2.0	4.0	2.0	2.0	3.0	66.76	PD056517	-
PD017409	Syk inhibitor II	NCCNc1ncc(C(N)=O)c(Nc2cccc(C(F)(F)F)c2)n1	FQNFLNSVHWCZML-UHFFFAOYSA-N	SYK	Homo sapiens									1										1								6.0	340.13	6.0	4.0	6.0	2.0	2.0	1.71	118.95	PD017409	-
PD017517	LOMETREXOL	Nc1nc2c(c(=O)[nH]1)C[C@@H](CCc1ccc(C(=O)N[C@@H](CCC(=O)O)C(=O)O)cc1)CN2	ZUQBAQVRAURMCL-DOMZBBRYSA-N	GART	Homo sapiens									1										1		1						2.0	443.18	7.0	6.0	9.0	3.0	2.0	0.62	187.5	PD070348	-
PD017565	TRYPTANTHRIN	O=C1c2ccccc2-n2c1nc1ccccc1c2=O	VQQVWGVXDIPORV-UHFFFAOYSA-N	PTGS2	Homo sapiens									1							1			1								19.0	248.06	4.0	0.0	0.0	4.0	3.0	1.93	51.96	PD017565	-
PD017635	AH 7614	Cc1ccc(S(=O)(=O)NC2c3ccccc3Oc3ccccc32)cc1	OZCQEUZTOAAWDK-UHFFFAOYSA-N	FFAR4	Homo sapiens												1							1		1						1.0	351.09	3.0	1.0	3.0	4.0	3.0	4.17	55.4	PD017635	-
PD017644	MCC-950	CC(C)(O)c1coc(S(=O)(=O)NC(=O)Nc2c3c(cc4c2CCC4)CCC3)c1	HUUSXLKCTQDPGL-UHFFFAOYSA-N	NLRP3	Homo sapiens		1		1									1			1		1			1						1.0	404.14	5.0	3.0	4.0	4.0	2.0	2.99	108.64	PD017644	-
PD017689	CPDA	O=C(O)CC1CCC2(CC1)CCN(c1cc(OC(F)(F)F)ccc1Cl)CC2	WUJVPELCYCESAP-UHFFFAOYSA-N	FFAR4	Homo sapiens		1		1									1			1		1			1						1.0	405.13	3.0	1.0	4.0	3.0	1.0	5.49	49.77	PD017689	-
PD017867	Compound 56	CCOc1cc2ncnc(Nc3cccc(Br)c3)c2cc1OCC	YXOXHAUUTIOBDA-UHFFFAOYSA-N	EGFR	Homo sapiens									1										1		1						4.0	387.06	5.0	1.0	6.0	3.0	3.0	4.93	56.27	PD017867	-
PD017904	LEI-106	CC1(C)CCc2cc(S(=O)(=O)N(CC(=O)O)Cc3ccc(Oc4ccccc4)cc3)ccc2O1	FOEGBOXMDBPYEV-UHFFFAOYSA-N	DAGLA	Homo sapiens												1							1		1						2.0	481.16	5.0	1.0	8.0	4.0	3.0	4.86	93.14	PD017904	-
PD017905	BIX-02188	CN(C)Cc1cccc(N/C(=C2\C(=O)Nc3cc(C(N)=O)ccc32)c2ccccc2)c1	FSZPIAXLCCQFCM-FCQUAONHSA-N	MAP2K5	Homo sapiens		1		1								1				1		1	1								2.0	412.19	4.0	3.0	6.0	4.0	3.0	3.78	87.46	PD003248	-
PD018599	MPI_5a	Cn1cccc1C(=O)N1CCc2cc(C(=O)NO)ccc2C1	NNQAQGDSGCGFER-UHFFFAOYSA-N	HDAC6	Homo sapiens												1							1		1						4.0	299.13	4.0	2.0	2.0	3.0	2.0	1.34	74.57	PD018599	-
PD018600	KM 233	CC1=CC[C@@H]2[C@@H](C1)c1c(O)cc(C(C)(C)c3ccccc3)cc1OC2(C)C	GZYXCXRHVALIJD-WOJBJXKFSA-N	CNR2	Homo sapiens									1										1		1			1			2.0	362.22	2.0	1.0	2.0	4.0	2.0	6.33	29.46	PD088641	-
PD018729	7-Aminoflunitrazepam-d7 (CRM)	C[C@@H](CN1CCC(n2c(=O)[nH]c3cc(Br)ccc32)CC1)NC(=O)[C@@H]1C[C@H]1c1ccccc1	JSVNNLRZCJAYTQ-ORYQWCPZSA-N	PLD1	Homo sapiens				1	1											1		1			1						2.0	496.15	4.0	2.0	6.0	5.0	3.0	4.04	70.13	PD032275	-
PD018873	A-079	CCC(=N\O)/C(C)=C/c1ccc(F)cc1	HKROEBDHHKMNBZ-CHBKHGQFSA-N	TRPA1	Homo sapiens				1			1									1		1									3.0	207.11	2.0	1.0	3.0	1.0	1.0	3.47	32.59	PD010442	-
PD019104	LY2183240 2’-isomer	CN(C)C(=O)n1nnc(Cc2ccc(-c3ccccc3)cc2)n1	VBVLSXPOMAONNK-UHFFFAOYSA-N	MGLL	Homo sapiens									1										1								5.0	307.14	5.0	0.0	3.0	3.0	3.0	2.46	63.91	PD019104	-
PD019400	Phthalazinone pyrazole	Cc1cc(Nc2nn(-c3ccccc3)c(=O)c3ccccc23)n[nH]1	DSDIWWSXOOXFSI-UHFFFAOYSA-N	AURKA	Homo sapiens									1										1								1.0	317.13	5.0	2.0	3.0	4.0	4.0	3.16	75.6	PD019400	-
PD019579	HAMI3379	O=C(O)c1ccc(OCCCc2ccc(OCCCCOC3CCCCC3)cc2)c(C(=O)NC2CCCC(C(=O)O)C2)c1	HRJWSEPIRZRGCL-UHFFFAOYSA-N	CYSLTR2	Homo sapiens				1								1	1			1			1		1						1.0	595.31	6.0	3.0	16.0	4.0	2.0	6.28	131.39	PD019579	-
PD019848	JWH015	CCCn1c(C)c(C(=O)c2cccc3ccccc23)c2ccccc21	LJSBBBWQTLXQEN-UHFFFAOYSA-N	CNR2	Homo sapiens									1										1					1			14.0	327.16	2.0	0.0	4.0	4.0	4.0	5.74	22.0	PD019848	-
PD020253	CAY10499	COc1nn(-c2ccc(NC(=O)OCc3ccccc3)c(C)c2)c(=O)o1	QTENHWTVRQKWRI-UHFFFAOYSA-N	FAAH	Homo sapiens									1										1								2.0	355.12	7.0	1.0	5.0	3.0	3.0	2.89	95.59	PD020253	-
PD020260	Epoxomicin	CC[C@H](C)[C@H](NC(=O)[C@H]([C@@H](C)CC)N(C)C(C)=O)C(=O)N[C@H](C(=O)N[C@@H](CC(C)C)C(=O)[C@@]1(C)CO1)[C@@H](C)O	DOGIDQKFVLKMLQ-JTHVHQAWSA-N	PSMB5	Homo sapiens									1			1					1		1		1					1	4.0	554.37	7.0	4.0	16.0	1.0	0.0	1.16	157.44	PD049293	-
PD020414	CAY10592	O=C(O)COc1ccc(SCC=C(c2ccc(Br)cc2)c2ccc(Br)cc2)cc1Cl	NQIYGYDPRBEUAZ-UHFFFAOYSA-N	PPARD	Homo sapiens									1										1		1						1.0	565.9	3.0	1.0	8.0	3.0	3.0	7.55	46.53	PD020414	-
PD021155	17.beta.-hydroxy Wortmannin	COC[C@H]1OC(=O)c2coc3c2[C@@]1(C)C1=C(C3=O)[C@@H]2CC[C@H](O)[C@@]2(C)C[C@H]1OC(C)=O	XLJORQYAOTYVQS-OGCOKEDGSA-N	PIK3CA	Homo sapiens									1										1				1				3.0	430.16	8.0	1.0	3.0	5.0	1.0	2.33	112.27	PD051092	-
PD021291	CLOPROSTENOL	O=C(O)CCC/C=C\C[C@H]1[C@@H](O)C[C@@H](O)[C@@H]1/C=C/[C@@H](O)COc1cccc(Cl)c1	VJGGHXVGBSZVMZ-QIZQQNKQSA-N	PTGFR	Homo sapiens				1								1				1			1		1						10.0	424.17	5.0	4.0	11.0	2.0	1.0	3.2	107.22	PD068368	-
PD021493	TMS	COc1cc(/C=C/c2ccc(OC)cc2OC)cc(OC)c1	JDBCWSHYEQUBLW-AATRIKPKSA-N	CYP1B1	Homo sapiens									1										1		1						3.0	300.14	4.0	0.0	6.0	2.0	2.0	3.89	36.92	PD065033	-
PD021504	Ac-YVAD-CHO	CC(=O)N[C@@H](Cc1ccc(O)cc1)C(=O)N[C@H](C(=O)N[C@@H](C)C(=O)N[C@H](C=O)CC(=O)O)C(C)C	LPIARALSGDVZEP-SJVNDZIOSA-N	CASP1	Homo sapiens									1										1								2.0	492.22	7.0	6.0	13.0	1.0	1.0	-0.76	191.0	PD074770	-
PD021525	CPI-360	COc1cc(C)[nH]c(=O)c1CNC(=O)c1c(C)n([C@H](C)C2CCOCC2)c2ccccc12	PFPSFENQCNMITC-MRXNPFEDSA-N	EZH2	Homo sapiens		1		1								1						1	1								1.0	437.23	5.0	2.0	6.0	4.0	3.0	3.87	85.35	PD034883	-
PD021541	CPI-169 R-enantiomer	CCS(=O)(=O)N1CCC([C@@H](C)n2c(C)c(C(=O)NCc3c(OC)cc(C)[nH]c3=O)c3ccccc32)CC1	LHGUZCKPFXXVPV-GOSISDBHSA-N	EZH1;EZH2	Homo sapiens		1		1								1				1		1	1								1.0	528.24	6.0	2.0	8.0	4.0	3.0	3.51	113.5	PD012481	-
PD021556	G749	CN1CCC(Nc2nc(Nc3ccc(Oc4ccccc4)cc3)c3c(=O)[nH]cc(Br)c3n2)CC1	SXWMIXPJPNCXQQ-UHFFFAOYSA-N	FLT3	Homo sapiens		1											1					1									2.0	520.12	7.0	3.0	6.0	5.0	4.0	5.12	95.17	PD021556	-
PD021559	GTPL8235	O=C([C@@H](Cc1cccc(C(F)(F)F)c1)NS(=O)(=O)c1cc(F)c2c(c1)CCNC2)N1CCCC1	JCKGSPAAPQRPBW-OAQYLSRUSA-N	SETD7	Homo sapiens		1		1						1	1	1				1		1	1								1.0	499.16	4.0	2.0	6.0	4.0	2.0	3.0	78.51	PD056012	-
PD021568	pan-FGFR inhibitor (FIIN-2)	C=CC(=O)Nc1ccc(CN2C(=O)N(c3cc(OC)cc(OC)c3)Cc3cnc(Nc4ccc(N5CCN(C)CC5)cc4)nc32)cc1	DVBPRWJMHURKHP-UHFFFAOYSA-N	FGFR1;FGFR2;FGFR3;FGFR4	Homo sapiens			1	1														1									4.0	634.3	9.0	2.0	10.0	6.0	4.0	5.26	115.4	PD021568	-
PD021574	NMS-E973	CN1CCC(NC(=O)c2cc(-c3c(O)cc(O)cc3Oc3ccc([N+](=O)[O-])cc3)on2)CC1	YLQODGGPIHWTHR-UHFFFAOYSA-N	HSP90AA1	Homo sapiens									1										1								2.0	454.15	9.0	3.0	6.0	4.0	3.0	3.28	151.2	PD021574	-
PD021586	IDASANUTLIN	COc1cc(C(=O)O)ccc1NC(=O)[C@@H]1N[C@@H](CC(C)(C)C)[C@](C#N)(c2ccc(Cl)cc2F)[C@H]1c1cccc(Cl)c1F	TVTXCJFHQKSQQM-LJQIRTBHSA-N	MDM2	Homo sapiens		1		1												1		1									2.0	615.15	5.0	3.0	7.0	4.0	3.0	6.94	111.45	PD056828	-
PD021587	pinometostat	CC(C)N(C[C@H]1O[C@@H](n2cnc3c(N)ncnc32)[C@H](O)[C@@H]1O)C1CC(CCc2nc3cc(C(C)(C)C)ccc3[nH]2)C1	LXFOLMYKSYSZQS-XKHGBIBOSA-N	DOT1L	Homo sapiens		1		1					1			1				1		1	1								1.0	562.34	10.0	4.0	8.0	6.0	4.0	3.32	151.23	PD013052	-
PD021634	BAFETINIB	Cc1ccc(NC(=O)c2ccc(CN3CC[C@H](N(C)C)C3)c(C(F)(F)F)c2)cc1Nc1ncc(-c2cncnc2)cn1	ZOPBZHLJXQAQON-VWLOTQADSA-N	LYN;ABL1;ABL1,BCR	Homo sapiens		1										1						1	1								0.0	576.26	8.0	2.0	8.0	5.0	4.0	5.39	99.17	PD063215	-
PD021685	WAY 213613	N[C@@H](CC(=O)Nc1ccc(Oc2cc(F)c(F)cc2Br)cc1)C(=O)O	BNYDDAAZMBUFRG-ZDUSSCGKSA-N	SLC1A2	Homo sapiens				1								1	1			1			1		1						4.0	414.0	4.0	3.0	6.0	2.0	2.0	3.26	101.65	PD025781	-
PD032335	ML197	Cc1nc(CNc2ncnc3ccc(-c4ccc5c(c4)OCO5)cc23)cs1	LELRIWOVACJYND-UHFFFAOYSA-N	CLK1,CLK4;CLK4;CLK1	Homo sapiens					1													1									8.0	376.1	7.0	1.0	4.0	5.0	4.0	4.4	69.16	PD032335	-
PD032471	ML400	COc1ccc(-c2cc(NCCCN3CCCCC3)c3ccccc3n2)cc1	CCEQOVGPLKQKET-UHFFFAOYSA-N	ACP1	Homo sapiens					1													1									1.0	375.23	4.0	1.0	7.0	4.0	3.0	5.2	37.39	PD032471	-
PD032475	ML395	O=C(NCCN1CCC2(CC1)C(=O)NCN2Cc1cccnc1)c1ccc2ccccc2c1	VBJYNYMKFQGJCH-UHFFFAOYSA-N	PLD2	Homo sapiens					1													1									1.0	443.23	5.0	2.0	6.0	5.0	3.0	2.39	77.57	PD032475	-
PD032494	ML358	CCOc1cc(CNC2CCCC2)cc(Cl)c1OCc1ccc(Cl)cc1	FODIKOLBYKPALO-UHFFFAOYSA-N	SKN-1	Caenorhabditis elegans					1													1									1.0	393.13	3.0	1.0	8.0	3.0	2.0	6.0	30.49	PD032494	-
PD032605	FURAMIDINE	N=C(N)c1ccc(-c2ccc(-c3ccc(C(=N)N)cc3)o2)cc1	ZJHZBDRZEZEDGB-UHFFFAOYSA-N	NQO2	Homo sapiens									1							1			1								10.0	304.13	3.0	4.0	4.0	3.0	3.0	3.18	112.88	PD032605	-
PD032917	TC-A 2317 hydrochloride	Cc1cc(Nc2cc(C)c(C#N)c(NC(C)CCCC(C)(C)O)n2)n[nH]1	XHHRGYCOEVNAKV-UHFFFAOYSA-N	AURKA	Homo sapiens									1										1		1						5.0	356.23	6.0	4.0	8.0	2.0	2.0	3.78	109.65	PD032917	1
PD070361	TC-A-2317	Cc1cc(Nc2cc(C)c(C#N)c(N[C@@H](C)CCCC(C)(C)O)n2)n[nH]1	XHHRGYCOEVNAKV-ZDUSSCGKSA-N	AURKA	Homo sapiens									1										1		1						4.0	356.23	6.0	4.0	8.0	2.0	2.0	3.78	109.65	PD032917	1
PD033171	4-Nitrobenzoate	O=C(O)c1ccc([N+](=O)[O-])cc1	OTLNPYWUJOZPPA-UHFFFAOYSA-N		-						1												1									5.0	167.02	3.0	1.0	2.0	1.0	1.0	1.29	80.44	PD033171	-
PD034673	GW771127A	Cc1c2ccc(N(C)c3ccnc(Nc4cccc(S(N)(=O)=O)c4)n3)cc2nn1C	RLIRKBLVQDRMIA-UHFFFAOYSA-N	KDR	Homo sapiens									1										1								5.0	423.15	8.0	2.0	5.0	4.0	4.0	2.83	119.03	PD034673	-
PD034675	GW770220A	Cc1nn(C)c2cc(N(C)c3ccnc(Nc4cccc(S(N)(=O)=O)c4)n3)ccc12	ZVATUDPCDDOZRM-UHFFFAOYSA-N	KDR	Homo sapiens									1										1								5.0	423.15	8.0	2.0	5.0	4.0	4.0	2.83	119.03	PD034675	-
PD034794	GSK619487A	CCn1c(-c2nonc2N)nc2c(C#CC(C)(C)O)ncc(OC3CCNCC3)c21	OEMAOMXEFJMDSR-UHFFFAOYSA-N	AKT2	Homo sapiens									1										1								5.0	411.2	10.0	3.0	4.0	4.0	3.0	1.34	137.14	PD034794	-
PD035687	PD 102807	CCOC(=O)c1c(C)[nH]c2ccc3c(c12)CN1CCc2cc(OC)ccc2C1O3	VDDUJINYXKGZLV-UHFFFAOYSA-N	CHRM4	Homo sapiens												1							1		1						6.0	392.17	5.0	1.0	3.0	5.0	3.0	4.11	63.79	PD035687	-
PD036132	THZ1	CN(C)C/C=C/C(=O)Nc1ccc(C(=O)Nc2cccc(Nc3ncc(Cl)c(-c4c[nH]c5ccccc45)n3)c2)cc1	OBJNFLYHUXWUPF-IZZDOVSWSA-N	CDK7	Homo sapiens		1	1	1								1		1		1		1	1								11.0	565.2	6.0	4.0	9.0	5.0	5.0	6.33	115.04	PD003262	-
PD036134	DS-437	CCNC(=O)NCCSC[C@H]1OC(n2cnc3c(N)ncnc32)[C@H](O)[C@H]1O	CACMCLIHCDTJHL-XLAISSFRSA-N	PRMT5	Homo sapiens												1							1								2.0	397.15	10.0	5.0	7.0	3.0	2.0	-0.92	160.44	PD023715	1
PD126764	DS437	CCNC(=O)NCCSC[C@H]1O[C@@H](n2cnc3c(N)ncnc32)[C@H](O)[C@@H]1O	CACMCLIHCDTJHL-IDTAVKCVSA-N	PRMT5;PRMT7	Homo sapiens		1														1		1									2.0	397.15	10.0	5.0	7.0	3.0	2.0	-0.92	160.44	PD023715	1
PD036136	ABPA3	C#Cc1cccc(Nc2ncnc3c2ncn3[C@@H]2O[C@H](COS(N)(=O)=O)[C@@H](O)[C@H]2O)c1	LZNFQRSVDZCPTR-SCFUHWHPSA-N	UBA1;UBA3	Homo sapiens		1										1						1	1								0.0	446.1	11.0	4.0	6.0	4.0	3.0	-0.61	174.71	PD034877	-
PD036137	PF-477736	Cn1cc(-c2nc3cc(NC(=O)[C@H](N)C4CCCCC4)cc4c3-c2c[nH][nH]c4=O)cn1	YFNWWNRZJGMDBR-LJQANCHMSA-N	CHEK1	Homo sapiens		1		1								1						1	1								2.0	419.21	6.0	4.0	4.0	5.0	2.0	2.6	134.48	PD003272	-
PD036139	BMS-911543	CCn1c(C(=O)N(C2CC2)C2CC2)cc2c3c(ncn3C)c(Nc3cc(C)n(C)n3)nc21	JCINBYQJBYJGDM-UHFFFAOYSA-N	JAK2	Homo sapiens		1		1								1	1					1	1		1						8.0	432.24	8.0	1.0	6.0	6.0	4.0	3.5	85.8	PD036139	-
PD036142	GTPL8577	COc1cc(C(=O)N2CC[C@@H](O)[C@@H](N)C2)cc2nc(-c3cc4ccccc4n3CC3CC3)n(C)c12	BDYDINKSILYBOL-WMZHIEFXSA-N	PADI4	Homo sapiens		1		1		1					1	1				1		1	1								1.0	473.24	7.0	2.0	5.0	6.0	4.0	3.15	98.54	PD006456	-
PD036144	VU0516310-1	N#Cc1ccc(OCCCN2CCC([C@@](N)(c3ccccc3)C3CCCC3)CC2)cc1	AUWUGRCKTQSGJY-HHHXNRCGSA-N	KMT2A	Homo sapiens		1										1						1	1								1.0	417.28	4.0	1.0	8.0	4.0	2.0	5.08	62.28	PD034880	-
PD036146	AZ6102	Cc1cc(N2C[C@H](C)N[C@H](C)C2)ncc1-c1ccc(-c2nc3c(ccn3C)c(=O)[nH]2)cc1	WCPTUQOMNJBIET-CALCHBBNSA-N	TNKS,TNKS2;TNKS;TNKS2	Homo sapiens		1		1								1						1	1								6.0	428.23	6.0	2.0	3.0	5.0	4.0	3.49	78.84	PD034878	-
PD036148	BMN-673	Cn1ncnc1[C@H]1C2=c3c(cc(F)cc3=N[C@@H]1c1ccc(F)cc1)C(=O)NN2	IUEWAGVJRJORLA-HZPDHXFCSA-N	PARP1;PARP2	Homo sapiens		1		1								1						1	1	1							2.0	380.12	6.0	2.0	2.0	5.0	3.0	0.61	84.2	PD065333	-
PD036149	CCT 241533	COc1cc2c(cc1OC)C(N[C@@H]1CNC[C@H]1C(C)(C)O)=N/C(=C1/C=C(F)C=CC1=O)N2	IXTQNANZDPZION-GSOOIIRJSA-N	CHEK2	Homo sapiens		1		1								1						1	1								2.0	442.2	8.0	4.0	4.0	4.0	1.0	2.03	104.21	PD023544	-
PD036151	2X-121	O=c1[nH][nH]c2nc(CN3Cc4ccccc4C3)nc3cccc1c32	JLFSBHQQXIAQEC-UHFFFAOYSA-N	PARP1;PARP2;TNKS;TNKS2	Homo sapiens		1		1								1						1	1								4.0	317.13	4.0	2.0	2.0	5.0	4.0	2.32	77.67	PD036151	-
PD036153	JQEZ5	CCCc1cc(C)[nH]c(=O)c1CNC(=O)c1cc(-c2ccc(N3CCN(C)CC3)nc2)nc2c1cnn2C(C)C	LQTWDAYNGMMHLV-UHFFFAOYSA-N	EZH2	Homo sapiens		1										1						1	1								1.0	542.31	8.0	2.0	8.0	5.0	4.0	3.71	112.04	PD036153	-
PD036155	barasertib	CCN(CCCOc1ccc2c(Nc3cc(CC(=O)Nc4cccc(F)c4)[nH]n3)ncnc2c1)CCOP(=O)(O)O	GBJVVSCPOBPEIT-UHFFFAOYSA-N	AURKB	Homo sapiens		1		1								1						1	1								11.0	587.21	9.0	5.0	15.0	4.0	4.0	3.62	174.82	PD036155	-
PD036241	ML235	Oc1ccccc1/C=C/c1noc(-c2ccccc2O)n1	OUGQQERBJUGIMD-MDZDMXLPSA-N		-					1													1									11.0	280.08	5.0	2.0	3.0	3.0	3.0	3.32	79.38	PD032307	-
PD036360	ML234	O=C(Nc1nc2ccccc2s1)c1cccs1	ZMMOBGPTOLXOEW-UHFFFAOYSA-N		-					1													1									4.0	260.01	4.0	1.0	2.0	3.0	3.0	3.61	41.99	PD036360	-
PD036927	ML300	O=C(Nc1ccc(N(Cc2ccsc2)C(=O)Cn2nnc3ccccc32)cc1)C1CC1	OCKMJWOFMCSMEX-UHFFFAOYSA-N	PLD2	Homo sapiens					1													1									0.0	431.14	6.0	1.0	7.0	5.0	4.0	4.07	80.12	PD036927	-
PD037176	ML303	COc1cc(-c2ccnc3c2c(C)nn3-c2ccc(C(F)(F)F)cc2)ccc1O	YBRHGNCGFMRGSV-UHFFFAOYSA-N		-					1													1									0.0	399.12	5.0	1.0	3.0	4.0	4.0	5.13	60.17	PD037176	-
PD037345	ML365 Analog	Cc1cccc(C(=O)Nc2cccc(NC(=O)c3cccc(C(F)(F)F)c3)c2)c1	ISMGZXXGNKTCRO-UHFFFAOYSA-N	KCNK3	Homo sapiens												1							1		1						2.0	398.12	2.0	2.0	4.0	3.0	3.0	5.52	58.2	PD037345	-
PD037360	ML283	Cc1ccc2nc(-c3ccc4nc(-c5ccc(NC(=O)c6cccc(Cl)c6)cc5)sc4c3)sc2c1S(=O)(=O)O	XTZYUQOIANGEJC-UHFFFAOYSA-N		-					1													1									0.0	591.01	7.0	2.0	5.0	6.0	6.0	7.7	109.25	PD037360	-
PD038136	SAFit1	COc1ccc(CC[C@@H](OC(=O)[C@@H]2CCCCN2C(=O)[C@H](c2cc(OC)c(OC)c(OC)c2)C2CCCCC2)c2cccc(OCC(=O)O)c2)cc1OC	OEQZPFWOEOOISR-AKTKKGGCSA-N	FKBP5	Homo sapiens						1												1									2.0	747.36	10.0	1.0	17.0	5.0	3.0	7.16	139.29	PD033169	-
PD038159	BMS 566419	CCN1CCN(c2ccc(C(C)(C)NC(=O)c3cc4[nH]c5ccccc5c(=O)c4cc3F)cn2)CC1	XEVJUIZOZCFECP-UHFFFAOYSA-N	IMPDH2	Homo sapiens									1							1			1								4.0	487.24	5.0	2.0	5.0	5.0	4.0	4.02	81.33	PD038159	-
PD038251	AZD3988	O=C(O)C[C@H]1CC[C@H](c2ccc(NC(=O)c3nnc(Nc4ccc(F)c(F)c4)o3)cc2)CC1	NGEBYTLALFOQKI-HDJSIYSDSA-N	DGAT1	Homo sapiens		1		1														1			1						2.0	456.16	6.0	3.0	7.0	4.0	3.0	5.09	117.35	PD032834	-
PD038508	AC710	CCN1C(C)(C)CC(Oc2ccc(C(=O)Nc3ccc(NC(=O)Nc4cc(C(C)(C)C)on4)cc3)nc2)CC1(C)C	JVCWPUFNLFSKFS-UHFFFAOYSA-N	CSF1R;FLT3;KIT;PDGFRB;PDGFRA	Homo sapiens		1		1									1					1			1						5.0	562.33	7.0	3.0	7.0	4.0	3.0	6.68	121.62	PD038508	-
PD038564	VU0422288	O=C(Nc1ccc(Oc2ccc(Cl)cn2)c(Cl)c1)c1ccccn1	MZRLPXFGQKQHST-UHFFFAOYSA-N	GRM8;GRM7;GRM4	Homo sapiens					1								1					1									3.0	359.02	4.0	1.0	4.0	3.0	3.0	4.83	64.11	PD038564	-
PD038571	TC-G-1008	CNc1nc(NCc2ccc(NS(C)(=O)=O)cc2Cl)cc(-c2ccccn2)n1	DRSZMILOMUPIBJ-UHFFFAOYSA-N	GPR39	Homo sapiens												1							1		1						2.0	418.1	7.0	3.0	7.0	3.0	3.0	3.22	108.9	PD038571	-
PD038800	A 770041	COc1cc(-c2nn(C3CCC(N4CCN(C(C)=O)CC4)CC3)c3ncnc(N)c23)ccc1NC(=O)c1cc2ccccc2n1C	ZMNWFTYYYCSSTF-UHFFFAOYSA-N	LCK	Homo sapiens		1		1														1									22.0	621.32	10.0	2.0	6.0	7.0	5.0	4.48	136.43	PD038800	-
PD038801	S-TRITYL-L-CYSTEINE	N[C@@H](CSC(c1ccccc1)(c1ccccc1)c1ccccc1)C(=O)O	DLMYFMLKORXJPO-FQEVSTJZSA-N	KIF11	Homo sapiens												1							1								1.0	363.13	3.0	2.0	7.0	3.0	3.0	4.12	63.32	PD011357	-
PD038881	TAK1/MAP4K2 dual inhibitor (NG25)	CCN1CCN(Cc2ccc(NC(=O)c3ccc(C)c(Oc4ccnc5[nH]ccc45)c3)cc2C(F)(F)F)CC1	SMPGEBOIKULBCT-UHFFFAOYSA-N	MAP3K7;MAP4K2	Homo sapiens			1	1														1									7.0	537.24	5.0	2.0	7.0	5.0	4.0	6.07	73.49	PD038881	-
PD038954	CHELERYTHRINE	COc1ccc2c(c[n+](C)c3c4cc5c(cc4ccc23)OCO5)c1OC	LLEJIEBFSOEYIV-UHFFFAOYSA-N	PRKCE	Homo sapiens									1				1			1	1		1							1	46.0	348.12	4.0	0.0	2.0	5.0	4.0	3.72	40.8	PD038954	-
PD038988	BMS-509744	COc1cc(C)c(Sc2cnc(NC(=O)c3ccc(CNC(C)C(C)(C)C)cc3)s2)cc1C(=O)N1CCN(C(C)=O)CC1	ZHXNIYGJAOPMSO-UHFFFAOYSA-N	ITK	Homo sapiens									1							1			1								10.0	623.26	8.0	2.0	9.0	4.0	3.0	5.69	103.87	PD038988	-
PD038999	Aurora inhibitor (compound 1)	CN1C(=O)c2ccccc2N(C)c2nc(Nc3ccc(N4CCC(O)CC4)cc3)ncc21	DFQAJLQXPSPNJE-UHFFFAOYSA-N	AURKA;AURKB;AURKC	Homo sapiens		1	1	1														1									3.0	430.21	7.0	2.0	3.0	5.0	3.0	3.54	84.83	PD038999	-
PD039008	FGFR/EGFR dual inhibitor (FIIN-3)	C=CC(=O)Nc1ccc(CN(C(=O)Nc2c(Cl)c(OC)cc(OC)c2Cl)c2cc(Nc3ccc(N4CCN(C)CC4)cc3)ncn2)cc1	SFLKJNSBBVSPFE-UHFFFAOYSA-N	FGFR1;FGFR2;FGFR3;FGFR4	Homo sapiens			1	1														1									5.0	690.22	9.0	3.0	11.0	5.0	4.0	6.66	124.19	PD039008	-
PD039043	UNC3866	CCN(CC)CCCCC(NC(=O)C(CC(C)C)NC(=O)C(C)NC(=O)C(Cc1ccccc1)NC(=O)c1ccc(C(C)(C)C)cc1)C(=O)NC(CO)C(=O)OC	UMRRDXVUROEIKJ-UHFFFAOYSA-N	CBX7;CBX4	Homo sapiens		1																1									0.0	794.49	9.0	6.0	23.0	2.0	2.0	3.01	195.27	PD039043	-
PD039045	Cortistatin A	CN(C)C1CC23CCC4(O2)C(=CCC2(C)C(c5ccc6ccncc6c5)CCC42)C=C3C(O)C1O	KSGZCKSNTAJOJS-UHFFFAOYSA-N	CDK19;CDK8;CDK19,CDK8	Homo sapiens		1																1									0.0	472.27	5.0	2.0	2.0	7.0	2.0	4.35	65.82	PD039045	-
PD039047	JAK3i	C=CC(=O)Nc1ccc(F)c(-c2ncnc3[nH]cc(C(=O)OCC)c23)c1	KNLROUBMVYVLGX-UHFFFAOYSA-N	JAK3	Homo sapiens		1														1		1									1.0	354.11	5.0	2.0	5.0	3.0	3.0	3.07	96.97	PD039047	-
PD039324	PD039324	CN[C@@H](C)C(=O)N[C@H](C(=O)N1C[C@H]2CCCN2C[C@H]1C(=O)N[C@H](C)c1ccccc1)C1CCCCC1	CDSDNORWWOJTBG-KJGFFNNUSA-N	BIRC3	Homo sapiens									1										1								2.0	497.34	5.0	3.0	8.0	4.0	1.0	2.21	93.78	PD083611	-
PD039330	O-DESMETHYL TRAMADOL	CN(C)C[C@H]1CCCC[C@]1(O)c1cccc(O)c1	UWJUQVWARXYRCG-HIFRSBDPSA-N	OPRM1	Homo sapiens												1							1								6.0	249.17	3.0	2.0	3.0	2.0	1.0	2.33	43.7	PD090888	-
PD039340	PD039340	CN[C@@H](C)C(=O)N[C@H](C(=O)N1C[C@@H]2CCCN2C[C@H]1C(=O)N[C@@H]1CCOc2ccccc21)C1CCC(F)(F)CC1	MLZKFPXFMPNAJV-IMZPRDNVSA-N	BIRC3	Homo sapiens									1										1								2.0	561.31	6.0	3.0	7.0	5.0	1.0	2.22	103.01	PD081507	1
PD045879	PD045879	CN[C@@H](C)C(=O)N[C@H](C(=O)N1C[C@H]2CCCN2C[C@H]1C(=O)N[C@@H]1CCOc2ccccc21)C1CCC(F)(F)CC1	MLZKFPXFMPNAJV-HXMYXVSTSA-N	BIRC3	Homo sapiens									1										1								2.0	561.31	6.0	3.0	7.0	5.0	1.0	2.22	103.01	PD081507	1
PD039476	ogerin	Nc1nc(NCc2ccccc2)nc(-c2ccccc2CO)n1	MDGIEDNDSFMSLP-UHFFFAOYSA-N	GPR68	Homo sapiens		1		1			1						1			1		1									1.0	307.14	6.0	3.0	5.0	3.0	3.0	2.23	96.95	PD039476	-
PD039685	GSK-LSD1	c1ccc([C@@H]2C[C@H]2NC2CCNCC2)cc1	BASFYRLYJAZPPL-UONOGXRCSA-N	KDM1A	Homo sapiens				1							1					1		1									1.0	216.16	2.0	2.0	3.0	3.0	1.0	1.88	24.06	PD006377	-
PD039967	AM404	CCCCC/C=C\C/C=C\C/C=C/C/C=C\CCCC(=O)Nc1ccc(O)cc1	IJBZOOZRAXHERC-AVHBIOJASA-N	TRPV1	Homo sapiens									1										1							1	24.0	395.28	2.0	2.0	15.0	1.0	1.0	7.48	49.33	PD033069	-
PD040172	BTZO-1	O=c1nc(-c2ccccn2)sc2ccccc12	GBAKVEWPYUIGHN-UHFFFAOYSA-N	MIF	Homo sapiens		1		1			1											1									2.0	240.04	4.0	0.0	1.0	3.0	3.0	2.72	42.85	PD040172	-
PD040370	UCM707	CCCCC/C=C\C/C=C\C/C=C/C/C=C\CCCC(=O)NCc1ccoc1	FZNNBSHTNRBBBD-AVHBIOJASA-N	CNR2	Homo sapiens									1										1		1						11.0	383.28	2.0	1.0	16.0	1.0	1.0	7.04	42.24	PD051201	-
PD040379	CHEMBL3596369	CCCN1CC[C@]23c4c5ccc(O)c4O[C@H]2c2nc4ccccc4cc2C[C@@]3(O)[C@H]1C5	BQOHCFQFDMHPBD-IFKAHUTRSA-N	OPRD1	Homo sapiens												1							1								0.0	414.19	5.0	2.0	2.0	7.0	3.0	3.64	65.82	PD064378	-
PD040386	PF-03882845	N#Cc1ccc(N2N=C3c4ccc(C(=O)O)cc4CC[C@@H]3[C@@H]2C2CCCC2)cc1Cl	XNULRSOGWPFPBL-REWPJTCUSA-N	NR3C2	Homo sapiens												1							1		1						3.0	419.14	4.0	1.0	3.0	5.0	2.0	5.26	76.69	PD022078	-
PD040551	OKADAIC ACID	C=C1[C@@H]([C@@H](O)C[C@H](C)[C@H]2O[C@@]3(CCCCO3)CC[C@H]2C)O[C@@H]2CC[C@@]3(CC[C@H](/C=C/[C@@H](C)[C@@H]4CC(C)=C[C@@]5(O[C@H](C[C@@](C)(O)C(=O)O)CC[C@H]5O)O4)O3)O[C@H]2[C@@H]1O	QNDVLZJODHBUFM-WFXQOWMNSA-N	PPP2R5A	Homo sapiens									1										1								6.0	804.47	12.0	5.0	10.0	7.0	0.0	5.21	182.83	PD075581	-
PD041304	CP 96345	COc1ccccc1CN[C@H]1C2CCN(CC2)[C@H]1C(c1ccccc1)c1ccccc1	FLNYLINBEZROPL-NSOVKSMOSA-N	TACR1	Homo sapiens				1					1							1			1		1						4.0	412.25	3.0	1.0	7.0	6.0	3.0	5.08	24.5	PD074685	-
PD041456	BIBP3226	NC(N)=NCCC[C@@H](NC(=O)C(c1ccccc1)c1ccccc1)C(=O)NCc1ccc(O)cc1	KUWBXRGRMQZCSS-HSZRJFAPSA-N	NPY1R	Homo sapiens				1								1	1						1		1						3.0	473.24	4.0	5.0	11.0	3.0	3.0	2.38	142.83	PD069179	1
PD069179	BIBP3226	N=C(N)NCCCC(NC(=O)C(c1ccccc1)c1ccccc1)C(=O)NCc1ccc(O)cc1	KUWBXRGRMQZCSS-UHFFFAOYSA-N	NPY1R	Homo sapiens									1										1		1						2.0	473.24	4.0	6.0	11.0	3.0	3.0	2.59	140.33	PD069179	1
PD045736	Symplostatin 5	C/C=C1\NC(=O)[C@@H](NC(=O)[C@@H](NC(=O)[C@@H](COS(=O)(=O)O)OC)C(C)C)[C@@H](C)OC(=O)[C@H]([C@H](C)CC)NC(=O)[C@H](Cc2ccccc2)N(C)C(=O)[C@H](Cc2ccccc2)N2C(=O)[C@H](CC[C@H]2O)NC1=O	MWNJAHQOLGNHPR-NPMPHBRVSA-N	ELANE	Homo sapiens												1							1								1.0	999.43	14.0	7.0	15.0	4.0	2.0	0.05	305.48	PD064500	-
PD046179	A-85380	c1cncc(OC[C@@H]2CCN2)c1	XKFMBGWHHBCWCD-QMMMGPOBSA-N	CHRNA4	Homo sapiens												1							1								10.0	164.09	3.0	1.0	3.0	2.0	1.0	0.82	34.15	PD094003	-
PD046413	AMELUBANT	CCOC(=O)NC(=N)c1ccc(OCc2cccc(COc3ccc(C(C)(C)c4ccc(O)cc4)cc3)c2)cc1	SBVYURPQULDJTI-UHFFFAOYSA-N	LTB4R	Homo sapiens				1				1										1									1.0	538.25	6.0	3.0	10.0	4.0	4.0	6.95	100.87	PD046413	-
PD046415	Benzimidazolone 8	COc1ccc(Oc2cc3c(cc2NS(=O)(=O)c2ccc(OC)c(OC)c2)n(C)c(=O)n3C)cc1	KNVIUMWNYXDULF-UHFFFAOYSA-N	TRIM24;BRPF1	Homo sapiens	1			1												1		1									4.0	499.14	9.0	1.0	8.0	4.0	4.0	3.5	110.02	PD046415	-
PD046646	AZD-4017	CCCSc1nc(N2CCC[C@@H](CC(=O)O)C2)ccc1C(=O)NC1CCCCC1	NCDZABJPWMBMIQ-INIZCTEOSA-N	HSD11B1	Homo sapiens												1							1		1						2.0	419.22	5.0	2.0	8.0	3.0	1.0	4.34	82.53	PD022104	-
PD046667	PF-03715455	CC(C)(C)c1cc(NC(=O)NCc2ccccc2Sc2ccc3nnc(-c4ccccc4SCCO)n3c2)n(-c2ccc(O)c(Cl)c2)n1	VGEXRDWWPSGZDH-UHFFFAOYSA-N	MAPK14	Homo sapiens									1										1								5.0	699.19	10.0	4.0	10.0	6.0	6.0	7.8	129.6	PD046667	-
PD046736	CHEMBL3410084	CC(C)(Nc1cc(NCC2CCOCC2)c2ncc(-c3ccc(C(=O)NC4CC4)cc3)n2n1)C(F)(F)F	LVBWRNKEBGYENR-UHFFFAOYSA-N	TTK	Homo sapiens												1							1								1.0	516.25	7.0	3.0	8.0	5.0	3.0	4.88	92.58	PD046736	-
PD046937	compound 30 [PMID: 16455256]	CC(C)Cn1c(=O)n(C)c(=O)c2c(C(=O)N3CC[C@@H](O)C3)c(Cc3ccnc4ccccc34)sc21	JOFQERPJMGKMMX-QGZVFWFLSA-N	SLC16A1	Homo sapiens				1					1				1						1		1						3.0	492.18	8.0	1.0	5.0	5.0	4.0	2.76	97.43	PD022779	-
PD046993	bag-1	CCC(C)(C)Cc1cnc(CCc2ccc(-c3ccccn3)cc2)[nH]1	WVAKRQOMAINQPU-UHFFFAOYSA-N	BRS3	Homo sapiens				1								1	1						1		1						5.0	333.22	2.0	1.0	7.0	3.0	3.0	5.24	41.57	PD046993	-
PD047351	ABL-001	O=C(Nc1ccc(OC(F)(F)Cl)cc1)c1cnc(N2CC[C@@H](O)C2)c(-c2ccn[nH]2)c1	VOVZXURTCKPRDQ-CQSZACIVSA-N	ABL1,BCR;ABL1	Homo sapiens		1		1														1									2.0	449.11	6.0	3.0	6.0	4.0	3.0	3.46	103.37	PD023219	-
PD047407	L-745870	Clc1ccc(N2CCN(Cc3c[nH]c4ncccc34)CC2)cc1	OGJGQVFWEPNYSB-UHFFFAOYSA-N	DRD4	Homo sapiens				1								1	1						1		1						28.0	326.13	3.0	1.0	3.0	4.0	3.0	3.54	35.16	PD047407	-
PD047781	SB 258719	Cc1cccc(S(=O)(=O)N(C)[C@H](C)CCN2CCC(C)CC2)c1	AGVNHDNTFYHZNL-QGZVFWFLSA-N	HTR7	Homo sapiens				1								1	1			1			1		1						7.0	338.2	3.0	0.0	6.0	2.0	1.0	3.13	40.62	PD023260	-
PD047918	CGS-21680	CCNC(=O)[C@H]1O[C@@H](n2cnc3c(N)nc(NCCc4ccc(CCC(=O)O)cc4)nc32)[C@H](O)[C@@H]1O	PAOANWZGLPPROA-RQXXJAGISA-N	ADORA2A	Homo sapiens				1					1				1			1			1		1						6.0	499.22	11.0	6.0	10.0	4.0	3.0	-0.16	197.74	PD075836	-
PD047959	8-OH-DPAT	CCCN(CCC)C1CCc2cccc(O)c2C1	ASXGJMSKWNBENU-UHFFFAOYSA-N	HTR1A	Homo sapiens									1				1			1			1					1			31.0	247.19	2.0	1.0	5.0	2.0	1.0	3.37	23.47	PD047959	-
PD047968	OL135	O=C(CCCCCCc1ccccc1)c1ncc(-c2ccccn2)o1	ILOIOIGZFHGSMS-UHFFFAOYSA-N	FAAH	Homo sapiens												1	1			1			1				1				4.0	334.17	4.0	0.0	9.0	3.0	3.0	5.11	55.99	PD047968	-
PD047979	TCPA	O=C(/N=N/Nc1nc(NC2CCCC2)c2ncn([C@@H]3O[C@H](CO)[C@@H](O)[C@H]3O)c2n1)Nc1ccccc1	RZJAODYQRFMAKN-WVSUBDOOSA-N	ADORA1	Homo sapiens				1								1	1						1		1					1	4.0	497.21	11.0	6.0	7.0	5.0	3.0	1.8	191.4	PD023442	-
PD048152	BN-81,644	CCCCC1(CCCC)N[C@@H](c2ncc(-c3ccccc3)[nH]2)Cc2c1[nH]c1ccccc21	FOBFICSYUINKAA-XMMPIXPASA-N	SSTR3	Homo sapiens												1							1		1						6.0	426.28	2.0	3.0	8.0	5.0	4.0	7.02	56.5	PD023356	-
PD048155	GNF-PF-3777	O=C1c2cc([N+](=O)[O-])ccc2-n2c1nc1ccccc1c2=O	UFMQJYHLIUACCG-UHFFFAOYSA-N	IDO1	Homo sapiens									1										1								3.0	293.04	6.0	0.0	1.0	4.0	3.0	1.84	95.1	PD048155	-
PD048200	compound 9 [PMID: 15615544]	Nc1nc(N)c2nc(CNc3ccc4c(c3)CN([C@@H](CCC(=O)O)C(=O)O)C4=O)cnc2n1	NYPQVENKFXVRKJ-ZDUSSCGKSA-N	DHFR	Homo sapiens									1				1						1								2.0	452.16	10.0	5.0	8.0	4.0	3.0	0.47	210.54	PD081528	1
PD081528	compound 9 [PMID: 15615544]	Nc1nc(N)c2nc(CNc3ccc4c(c3)CN(C(CCC(=O)O)C(=O)O)C4=O)cnc2n1	NYPQVENKFXVRKJ-UHFFFAOYSA-N	DHFR	Homo sapiens									1										1								2.0	452.16	10.0	5.0	8.0	4.0	3.0	0.47	210.54	PD081528	1
PD048303	BRADYKININ	NC(N)=NCCC[C@H](N)C(=O)N1CCC[C@H]1C(=O)N1CCC[C@H]1C(=O)NCC(=O)N[C@@H](Cc1ccccc1)C(=O)N[C@@H](CO)C(=O)N1CCC[C@H]1C(=O)N[C@@H](Cc1ccccc1)C(=O)N[C@@H](CCCN=C(N)N)C(=O)O	QXZGBUJJYSLZLT-FDISYFBBSA-N	BDKRB2	Homo sapiens												1							1								3.0	1059.56	13.0	12.0	27.0	5.0	2.0	-3.99	418.78	PD065932	-
PD048341	BPTU	CC(C)(C)c1ccccc1Oc1ncccc1NC(=O)Nc1ccc(OC(F)(F)F)cc1	AHFLGPTXSIRAQK-UHFFFAOYSA-N	P2RY1	Homo sapiens				1								1	1						1		1						2.0	445.16	4.0	2.0	5.0	3.0	3.0	6.71	72.48	PD048341	-
PD048438	PD157672	CC(C)(C)OC(=O)N[C@@H](Cc1ccccc1)C(=O)N[C@](C)(Cc1ccccc1)C(=O)NCCCCCCCNC(N)=O	BYVRLIUFCGUMSP-XYFQYJLHSA-N	TACR3	Homo sapiens				1					1				1						1		1						3.0	581.36	5.0	5.0	16.0	2.0	2.0	3.98	151.65	PD023902	-
PD048460	S26131	CC(=O)NCCc1cccc2ccc(OCCCOc3ccc4cccc(CCNC(C)=O)c4c3)cc12	NSXBZYDTTKLTOH-UHFFFAOYSA-N	MTNR1A	Homo sapiens												1							1		1						2.0	498.25	4.0	2.0	12.0	4.0	4.0	5.2	76.66	PD048460	-
PD048519	MRS1754	CCCn1c(=O)c2[nH]c(-c3ccc(OCC(=O)Nc4ccc(C#N)cc4)cc3)nc2n(CCC)c1=O	AJBBEYXFRYFVNM-UHFFFAOYSA-N	ADORA2B	Homo sapiens				1								1	1			1			1		1						15.0	486.2	8.0	2.0	9.0	4.0	4.0	3.26	134.8	PD048519	-
PD048561	VU0364739	O=C(NCCN1CCC2(CC1)C(=O)NCN2c1cccc(F)c1)c1ccc2ccccc2c1	MSTXJJGAXXJCBY-UHFFFAOYSA-N	PLD2	Homo sapiens				1	1							1	1					1	1		1						2.0	446.21	4.0	2.0	5.0	5.0	3.0	3.14	64.68	PD048561	-
PD048572	FK-788	O=C(O)COc1cccc2c1CC[C@](O)(COC(=O)N(c1ccccc1)c1ccccc1)C2	UZJAIYJXBYWENR-AREMUKBSSA-N	PTGIR	Homo sapiens									1										1								4.0	447.17	5.0	2.0	7.0	4.0	3.0	4.34	96.3	PD024166	-
PD048625	compound 46 [PMID: 16451062]	COc1cc2c(Nc3ncc(CC(=O)Nc4cccc(F)c4)s3)ncnc2cc1OCCCN1CCC(CO)CC1	QNJAKUMXJFWQOG-UHFFFAOYSA-N	AURKB	Homo sapiens									1										1								11.0	580.23	10.0	3.0	12.0	5.0	4.0	4.63	121.73	PD048625	-
PD048639	IRAK4 inhibitor rac-45 [PMID: 18501603]	Clc1ccc2ncc(-c3cccc(NC4CCNC4)n3)n2c1	NAMQQRIYZTTYCJ-UHFFFAOYSA-N	IRAK4	Homo sapiens									1										1								2.0	313.11	5.0	2.0	3.0	4.0	3.0	2.82	54.25	PD048639	-
PD048653	GLPG-0974	C[C@]1(C(=O)N(CCCC(=O)O)Cc2cccc(Cl)c2)CCN1C(=O)c1csc2ccccc12	MPMKMQHJHDHPBE-RUZDIDTESA-N	FFAR2	Homo sapiens		1											1			1		1									1.0	484.12	4.0	1.0	8.0	4.0	3.0	5.05	77.92	PD024464	-
PD048700	SAREDUTANT	CC(=O)NC1(c2ccccc2)CCN(CC[C@H](CN(C)C(=O)c2ccccc2)c2ccc(Cl)c(Cl)c2)CC1	PGKXDIMONUAMFR-AREMUKBSSA-N	TACR2	Homo sapiens				1								1	1			1			1		1						3.0	551.21	3.0	1.0	9.0	4.0	3.0	6.37	52.65	PD068786	-
PD048794	ERTUGLIFLOZIN	CCOc1ccc(Cc2cc([C@]34OC[C@](CO)(O3)[C@@H](O)[C@H](O)[C@H]4O)ccc2Cl)cc1	MCIACXAZCBVDEE-CUUWFGFTSA-N	SLC5A4	Homo sapiens												1							1	1	1						3.0	436.13	7.0	4.0	6.0	4.0	2.0	1.36	108.61	PD023583	-
PD048849	VNA932	Cc1ccn(-c2ccc(C(=O)N3Cc4cccn4Cc4ccccc43)c(Cl)c2)n1	JXKQHDZUZGKDGO-UHFFFAOYSA-N	AVPR2	Homo sapiens												1	1						1					1			3.0	402.12	4.0	0.0	2.0	5.0	4.0	4.84	43.06	PD048849	-
PD048967	LUF5981	c1ccc(-c2cc(-c3ccccc3)c3nc(C4CCCCC4)[nH]c3n2)cc1	DXBBMCIVYYJMJC-UHFFFAOYSA-N	ADORA1	Homo sapiens												1							1		1						4.0	353.19	2.0	1.0	3.0	5.0	4.0	6.34	41.57	PD048967	-
PD049071	cpd2	Cc1c(NC(=O)c2cc3c(s2)CCCC3)cccc1-c1cn(C)c(=O)c(Nc2ccc([C@@H]3C(=O)N(C)CCN3C)cc2)n1	CDOOFZZILLRUQH-GDLZYMKVSA-N	BTK	Homo sapiens		1														1		1									1.0	596.26	8.0	2.0	6.0	6.0	4.0	5.14	99.57	PD062772	-
PD049073	HS665	Oc1cccc(CCN(CCc2ccccc2)CC2CCC2)c1	YNVKFHIWFDRVNY-UHFFFAOYSA-N	OPRK1	Homo sapiens												1							1		1			1			4.0	309.21	2.0	1.0	8.0	3.0	2.0	4.28	23.47	PD049073	-
PD049077	CPI-0610	Cc1noc2c1-c1ccccc1C(c1ccc(Cl)cc1)=N[C@H]2CC(N)=O	GCWIQUVXWZWCLE-INIZCTEOSA-N	BRDT;BRD2;BRD3;BRD4	Homo sapiens		1		1														1									1.0	365.09	4.0	1.0	3.0	4.0	3.0	4.07	81.48	PD055930	-
PD049179	GSK583	CC(C)(C)S(=O)(=O)c1ccc2nccc(Nc3n[nH]c4ccc(F)cc34)c2c1	XLOGLWKOHPIJLV-UHFFFAOYSA-N	RIPK2	Homo sapiens		1		1										1		1		1									9.0	398.12	5.0	2.0	3.0	4.0	4.0	4.57	87.74	PD049179	-
PD049301	A-192621	CCCOc1ccc([C@H]2[C@H](C(=O)O)[C@@H](c3ccc4c(c3)OCO4)CN2CC(=O)Nc2c(CC)cccc2CC)cc1	LQEHCKYYIXQEBM-FUKIBTTHSA-N	EDNRB	Homo sapiens				1			1		1				1					1	1		1						2.0	558.27	6.0	2.0	11.0	5.0	3.0	5.81	97.33	PD024950	-
PD049329	SB 714786	Cc1ccc2c(OCCN3CCN(Cc4cccc5cccnc45)CC3)cccc2n1	RMCSKUADBRROSI-UHFFFAOYSA-N	HTR1D	Homo sapiens				1								1	1						1		1						13.0	412.23	5.0	0.0	6.0	5.0	4.0	4.29	41.49	PD049329	-
PD049333	SB 699551	CN(C)CCN(Cc1ccc(-c2ccc(CNCCc3ccccc3)cc2)cc1)C(=O)CCC1CCCC1	SEQAMPXQRKYYQF-UHFFFAOYSA-N	HTR5A	Homo sapiens												1	1			1			1								14.0	511.36	3.0	1.0	14.0	4.0	3.0	6.55	35.58	PD049333	-
PD049397	BI-7273	COc1cc(-c2cn(C)c(=O)c3cnccc23)cc(OC)c1CN(C)C	RBUYFHLQNPJMQM-UHFFFAOYSA-N	BRD7;BRD9	Homo sapiens				1				1										1			1						5.0	353.17	6.0	0.0	5.0	3.0	3.0	2.68	56.59	PD049397	-
PD049399	ADL5747	CCN(CC)C(=O)c1ccc(C2=CC3(CCNCC3)Oc3ccccc32)c(O)c1	ALGHKWSXJUQNJJ-UHFFFAOYSA-N	OPRD1	Homo sapiens				1								1	1						1		1						5.0	392.21	4.0	2.0	4.0	4.0	2.0	3.82	61.8	PD049399	-
PD049425	D2202-1	Cc1cn(-c2cc(NC(=O)c3ccc4c(c3)CN(c3cncnc3)C[C@@H]4C)cc(C(F)(F)F)c2)cn1	CMJJZRAAQMUAFH-INIZCTEOSA-N	DDR1;DDR2;NTRK1;NTRK2;NTRK3	Homo sapiens				1							1			1				1									8.0	492.19	6.0	1.0	4.0	5.0	4.0	5.37	75.94	PD025197	-
PD049541	AD-5061	Cc1oc(-c2ccccc2)nc1CCOc1ccc(CC2SC(=O)NC2=O)cc1	GUTCYOKMCPFRGH-UHFFFAOYSA-N	PPARG	Homo sapiens									1										1		1						2.0	408.11	6.0	1.0	7.0	4.0	3.0	4.17	81.43	PD049541	-
PD049549	NEUROKININ A	CSCC[C@H](NC(=O)[C@H](CC(C)C)NC(=O)CNC(=O)[C@@H](NC(=O)[C@H](Cc1ccccc1)NC(=O)[C@H](CO)NC(=O)[C@H](CC(=O)O)NC(=O)[C@@H](NC(=O)[C@H](CCCCN)NC(=O)[C@@H](N)Cc1cnc[nH]1)[C@@H](C)O)C(C)C)C(N)=O	HEAUFJZALFKPBA-JPQUDPSNSA-N	TACR2	Homo sapiens									1			1							1		1						3.0	1132.57	17.0	16.0	37.0	2.0	2.0	-4.57	463.47	PD066170	-
PD049636	NE-100	CCCN(CCC)CCc1ccc(OC)c(OCCc2ccccc2)c1	YBLIQJGXRLZBCZ-UHFFFAOYSA-N	SIGMAR1	Homo sapiens									1				1						1								5.0	355.25	3.0	0.0	12.0	2.0	2.0	4.98	21.7	PD049636	-
PD049656	OLICERIDINE	COc1ccsc1CNCC[C@@]1(c2ccccn2)CCOC2(CCCC2)C1	DMNOVGJWPASQDL-OAQYLSRUSA-N	OPRM1	Homo sapiens												1							1	1	1			1			7.0	386.2	5.0	1.0	7.0	4.0	2.0	4.69	43.38	PD025435	-
PD049668	AZD6495	CCOc1cc2ncc(C(N)=O)c(Nc3ccc(F)cc3F)c2cc1N1CCN(C)CC1	IBHNEKVLDKCEQY-UHFFFAOYSA-N	CSF1R	Homo sapiens									1										1								4.0	441.2	6.0	2.0	6.0	4.0	3.0	3.51	83.72	PD049668	-
PD049707	PPTN	O=C(O)c1cc(-c2ccc(C3CCNCC3)cc2)c2ccc(-c3ccc(C(F)(F)F)cc3)cc2c1	FOECKIWHCOYYFL-UHFFFAOYSA-N	P2RY14	Homo sapiens				1			1						1			1		1			1						32.0	475.18	2.0	2.0	4.0	5.0	4.0	7.36	49.33	PD049707	-
PD049742	NGB-2904	O=C(NCCCCN1CCN(c2cccc(Cl)c2Cl)CC1)c1ccc2c(c1)Cc1ccccc1-2	YJPWVCIGSHWNON-UHFFFAOYSA-N	DRD3	Homo sapiens				1					1				1						1		1						10.0	493.17	3.0	1.0	7.0	5.0	3.0	5.9	35.58	PD049742	-
PD049936	compound 7d [PMID: 19111466]	O=C(NO)c1ccc(CN2c3ccccc3NC(=O)[C@H]2Cc2cccs2)cc1	HBEDNENASUYMPO-LJQANCHMSA-N	HDAC6	Homo sapiens									1										1								3.0	393.11	5.0	3.0	5.0	4.0	3.0	3.44	81.67	PD088666	-
PD050067	YIL781	Cc1nc2ccc(Oc3ccc(F)cc3)cc2c(=O)n1C[C@H]1CCCN(C(C)C)C1	FRKXOBMDEXCHHD-SFHVURJKSA-N	GHSR	Homo sapiens												1							1					1			4.0	409.22	5.0	0.0	5.0	4.0	3.0	4.76	47.36	PD025657	-
PD050069	JP1302	CN1CCN(c2ccc(Nc3c4ccccc4nc4ccccc34)cc2)CC1	QZKGUNQLVFEEBA-UHFFFAOYSA-N	ADRA2C	Homo sapiens									1			1	1			1			1							1	11.0	368.2	4.0	1.0	3.0	5.0	4.0	4.88	31.4	PD050069	-
PD050112	BI-4394	CCOC(=O)c1cc2cc(-c3cc(C(=O)NCc4ccc(C(=O)O)cc4)nn3C)ccc2[nH]1	MMJPVSDTLGFIQW-UHFFFAOYSA-N	MMP13	Homo sapiens				1			1	1										1									5.0	446.16	6.0	3.0	7.0	4.0	4.0	3.37	126.31	PD050112	-
PD050287	BIIE0246	NC(N)=NCCC[C@H](NC(=O)CC1(CC(=O)N2CCN(C3c4ccccc4NC(=O)c4ccccc43)CC2)CCCC1)C(=O)NCCn1c(=O)n(-c2ccccc2)n(-c2ccccc2)c1=O	RSJAXPUYVJKAAA-JPGJPTAESA-N	NPY2R	Homo sapiens		1		1				1					1			1		1									8.0	895.45	11.0	5.0	16.0	8.0	5.0	3.28	224.18	PD093911	1
PD064519	CHEMBL2307889	N=C(N)NCCC[C@@H](NC(=O)CC1(CC(=O)N2CCN(C3c4ccccc4NC(=O)c4ccccc43)CC2)CCCC1)C(=O)NCCn1c(=O)n(-c2ccccc2)n(-c2ccccc2)c1=O	RSJAXPUYVJKAAA-MJEROREJSA-N	NPY2R	Homo sapiens												1							1		1						4.0	895.45	11.0	6.0	16.0	8.0	5.0	3.49	221.68	PD093911	1
PD050401	SB-612111	Cc1cccc2c1CC[C@H](CN1CCC(c3c(Cl)cccc3Cl)CC1)C[C@@H]2O	OHRDCQFCAWLDBP-SBUREZEXSA-N	OPRL1	Homo sapiens		1		1					1				1					1	1		1						2.0	417.16	2.0	1.0	3.0	4.0	2.0	6.17	23.47	PD026003	-
PD050427	fMLP	CSCC[C@H](NC=O)C(=O)N[C@@H](CC(C)C)C(=O)N[C@@H](Cc1ccccc1)C(=O)O	PRQROPMIIGLWRP-BZSNNMDCSA-N	FPR1	Homo sapiens												1							1		1						6.0	437.2	5.0	4.0	14.0	1.0	1.0	1.2	124.6	PD026030	-
PD050465	UCM 454	CCC(=O)NCc1cc2c(OC)cccc2n1Cc1ccc(Cl)cc1	XXXKKZBZKUDKMA-UHFFFAOYSA-N	MTNR1B	Homo sapiens												1							1		1						2.0	356.13	3.0	1.0	6.0	3.0	3.0	4.38	43.26	PD050465	-
PD050706	AZD-7687	Cc1nc(C)c(-c2ccc([C@H]3CC[C@H](CC(=O)O)CC3)cc2)nc1C(N)=O	YXFNPRHZMOGREC-SHTZXODSSA-N	DGAT1	Homo sapiens												1							1		1						7.0	367.19	4.0	2.0	5.0	3.0	2.0	3.61	106.17	PD118676	-
PD050735	compound 18 [PMID: 20873740]	NC(=O)c1cc(-c2ccnc(N)n2)[nH]c1-c1ccccc1	VOQXQYXTZZHYBF-UHFFFAOYSA-N	CDC7	Homo sapiens									1										1								11.0	279.11	4.0	3.0	3.0	3.0	3.0	1.82	110.68	PD050735	-
PD050762	AFIMOXIFENE	CC/C(=C(\c1ccccc1)c1ccc(OCCN(C)C)cc1)c1ccc(O)cc1	DODQJNMQWMSYGS-QPLCGJKRSA-N	ESR1	Homo sapiens									1				1						1								10.0	387.22	3.0	1.0	8.0	3.0	3.0	5.7	32.7	PD039025	-
PD050807	L-371,257	COc1cc(OC2CCN(C(C)=O)CC2)ccc1C(=O)N1CCC(N2C(=O)OCc3ccccc32)CC1	WDERJSQJYIJOPD-UHFFFAOYSA-N	OXTR	Homo sapiens				1								1	1						1		1						4.0	507.24	6.0	0.0	5.0	5.0	2.0	3.85	88.62	PD050807	-
PD050864	CHEMBL3092413	N#Cc1ccc(N2CCN(Cc3cn4cc(Cl)ccc4n3)CC2)nc1	UGDJVSURAKMIPU-UHFFFAOYSA-N	GPR39	Homo sapiens												1							1								3.0	352.12	6.0	0.0	3.0	4.0	3.0	2.58	60.46	PD050864	-
PD050886	CHEMBL3318586	O=C(c1ccc(-c2cccc(Cl)c2)cc1)N1C2CCC1CN(c1ncccn1)C2	FNHAFYQTHUKPIU-UHFFFAOYSA-N	SLC6A7	Homo sapiens				1								1	1						1		1						2.0	404.14	4.0	0.0	3.0	5.0	3.0	4.29	49.33	PD050886	-
PD050972	TAK-779	Cc1ccc(-c2ccc3c(c2)C=C(C(=O)Nc2ccc(C[N+](C)(C)C4CCOCC4)cc2)CCC3)cc1	XNHZXMPLVSJQFK-UHFFFAOYSA-O	CCR5	Homo sapiens				1					1				1			1			1		1						4.0	495.3	2.0	1.0	6.0	5.0	3.0	6.78	38.33	PD050972	-
PD051001	ALX-5407	CN(CC[C@@H](Oc1ccc(-c2ccccc2)cc1)c1ccc(F)cc1)CC(=O)O	FDORQEIHOKEJNX-HSZRJFAPSA-N	SLC6A9	Homo sapiens									1			1	1						1								9.0	393.17	3.0	1.0	9.0	3.0	3.0	5.02	49.77	PD051000	-
PD051109	CHEMBL333357	NC(=O)[C@H](Cc1ccccc1)NC(=O)[C@H](Cc1ccccc1)NC(=O)[C@@H]1CCCN1C(=O)[C@@H](N)Cc1ccc(O)cc1	XIJHWXXXIMEHKW-LJWNLINESA-N	OPRM1	Homo sapiens												1							1		1			1			5.0	571.28	6.0	5.0	12.0	4.0	3.0	1.19	167.85	PD093991	-
PD051160	REGLITAZAR	Cc1oc(-c2ccccc2)nc1CCOc1ccc(CC2C(=O)NOC2=O)cc1	QBQLYIISSRXYKL-UHFFFAOYSA-N	PPARG	Homo sapiens									1										1								2.0	392.14	6.0	1.0	7.0	4.0	3.0	3.02	90.66	PD051160	-
PD051215	L873724	CC(C)C[C@H](N[C@@H](c1ccc(-c2ccc(S(C)(=O)=O)cc2)cc1)C(F)(F)F)C(=O)NCC#N	VYFDSJLOCIGIKP-SFTDATJTSA-N	CTSK	Homo sapiens									1										1								4.0	481.16	5.0	2.0	9.0	2.0	2.0	4.0	99.06	PD026522	-
PD051228	compound 8e [PMID: 24432909]	Cc1nc([C@](C)(O)CO)sc1-c1cnc(N)c(O[C@H](C)c2cc(F)ccc2-n2nccn2)c1	DIXMBHMNEHPFCX-MCMMXHMISA-N	ROS1	Homo sapiens									1				1						1								13.0	470.15	10.0	3.0	7.0	4.0	4.0	3.16	132.2	PD026532	-
PD051253	compound 15 [PMID: 24900237]	CCN1C(=O)CCCc2c1ccc(Nc1ncc(Cl)c(N[C@H]3[C@@H](C(N)=O)[C@@H]4C=C[C@H]3C4)n1)c2OC	GLGNXYJARSMNGJ-VKTIVEEGSA-N	ALK	Homo sapiens									1										1		1						3.0	496.2	7.0	3.0	7.0	5.0	2.0	3.66	122.47	PD026553	-
PD051267	SR9238	CCOC(=O)c1ccc(CN(Cc2ccc(-c3cccc(S(C)(=O)=O)c3)cc2)S(=O)(=O)c2c(C)cc(C)cc2C)o1	HDZWHJYZJWLTAG-UHFFFAOYSA-N	NR1H2,NR1H3;NR1H2;NR1H3	Homo sapiens		1														1		1									2.0	595.17	7.0	0.0	10.0	4.0	4.0	5.84	110.96	PD051267	-
PD051378	AMG837	CC#C[C@@H](CC(=O)O)c1ccc(OCc2cccc(-c3ccc(C(F)(F)F)cc3)c2)cc1	ZOPNBMMVVZRSGH-NRFANRHFSA-N	FFAR1	Homo sapiens		1											1					1									1.0	438.14	2.0	1.0	7.0	3.0	3.0	6.53	46.53	PD026738	-
PD051440	CHEMBL1394231	CCc1ccc(S(=O)(=O)c2nnn3c2nc(NCc2cccs2)c2sccc23)cc1	UYFZCWXRMHSLTC-UHFFFAOYSA-N	SLC14A1	Homo sapiens				1								1	1			1			1		1						3.0	455.05	9.0	1.0	6.0	5.0	5.0	4.41	89.25	PD051440	-
PD051450	CHEMBL2158866	CCN(CC)S(=O)(=O)c1cc(Nc2nccc(-c3ccnc(-c4ccc(NC(=O)NC)cc4)c3)n2)ccc1Cl	RZFJBSIAXYEPBX-UHFFFAOYSA-N	SMG1	Homo sapiens									1			1							1		1						8.0	565.17	7.0	3.0	9.0	4.0	4.0	5.38	129.21	PD051450	-
PD051466	eCF506	COc1cc(-c2nn(CCN3CCC(N(C)C)CC3)c3ncnc(N)c23)ccc1NC(=O)OC(C)(C)C	GMPQGWXPDRNCBL-UHFFFAOYSA-N	SRC	Homo sapiens		1		1												1		1									11.0	510.31	10.0	2.0	7.0	4.0	3.0	3.46	123.66	PD051466	-
PD051579	RELACATIB	CC(C)C[C@H](NC(=O)c1cc2ccccc2o1)C(=O)N[C@H]1CC[C@@H](C)N(S(=O)(=O)c2ccccn2)CC1=O	BWYBBMQLUKXECQ-GIVPXCGWSA-N	CTSK;CTSL;CTSV	Homo sapiens		1		1														1									5.0	540.2	7.0	2.0	8.0	4.0	3.0	2.9	138.68	PD027088	-
PD051637	VU0155069	C[C@@H](CN1CCC(n2c(=O)[nH]c3cc(Cl)ccc32)CC1)NC(=O)c1ccc2ccccc2c1	DRIMIUYGTDAQOX-KRWDZBQOSA-N	PLD1	Homo sapiens				1								1	1						1		1						2.0	462.18	4.0	2.0	5.0	5.0	4.0	4.59	70.13	PD021472	-
PD051751	QA1	CCC(C)(CCN1CCOCC1)N(Cc1cc2ccccc2n(C)c1=O)C(=O)C1CCCCC1	FWHNGUFKFXDMER-UHFFFAOYSA-N	NPSR1	Homo sapiens												1							1								1.0	467.31	5.0	0.0	8.0	4.0	2.0	4.34	54.78	PD051751	-
PD051864	THIQ	O=C(N[C@H](Cc1ccc(Cl)cc1)C(=O)N1CCC(Cn2cncn2)(C2CCCCC2)CC1)[C@H]1Cc2ccccc2CN1	HLCHESOMJVGDSJ-LOYHVIPDSA-N	MC4R	Homo sapiens				1								1	1			1			1		1						4.0	588.3	6.0	2.0	8.0	6.0	3.0	4.56	92.15	PD027345	-
PD051990	SUBSTANCE P	CSCC[C@H](NC(=O)[C@H](CC(C)C)NC(=O)CNC(=O)[C@H](Cc1ccccc1)NC(=O)[C@H](Cc1ccccc1)NC(=O)[C@H](CCC(N)=O)NC(=O)[C@H](CCC(N)=O)NC(=O)[C@@H]1CCCN1C(=O)[C@H](CCCCN)NC(=O)[C@@H]1CCCN1C(=O)[C@@H](N)CCCN=C(N)N)C(N)=O	ADNPLDHMAVUMIW-CUZNLEPHSA-N	TACR1	Homo sapiens												1							1		1						4.0	1346.73	17.0	15.0	42.0	4.0	2.0	-3.71	519.13	PD075742	-
PD052560	PF-3274167	COCc1nnc(N2CC(Oc3ccc(F)cc3Cl)C2)n1-c1ccc(OC)nc1	HNIFCPBQMKPRCX-UHFFFAOYSA-N	OXTR	Homo sapiens												1							1		1						6.0	419.12	8.0	0.0	7.0	4.0	3.0	2.88	74.53	PD052560	-
PD052749	CHEMBL3115074	C[C@H](NC(=O)[C@H]1CCCCN1CCOc1ccccc1)c1ccc(C(=O)O)cc1	ADSVKUMNMQPBKC-LAUBAEHRSA-N	PTGER4	Homo sapiens				1								1				1			1		1						2.0	396.2	4.0	2.0	8.0	3.0	2.0	3.5	78.87	PD064422	-
PD052831	PD052831	CN[C@@H](C)C(=O)N[C@H](C(=O)N1C[C@H]2CCCN2C[C@H]1C(=O)N[C@@H]1CCC(=O)c2ccccc21)C1CCCCC1	IGXOJMRPLSENQA-XXQBKKMUSA-N	BIRC3	Homo sapiens									1										1								2.0	537.33	6.0	3.0	7.0	5.0	1.0	2.17	110.85	PD081824	-
PD052855	PD052855	CCCCCCCCCCCCCCCCCC(=O)NCCCO[C@H]1O[C@H](COS(=O)(=O)O)[C@@H](OS(=O)(=O)O)[C@H](OS(=O)(=O)O)[C@@H]1O[C@H]1O[C@H](COS(=O)(=O)O)[C@@H](OS(=O)(=O)O)[C@H](O[C@H]2O[C@H](COS(=O)(=O)O)[C@@H](OS(=O)(=O)O)[C@H](O[C@H]3O[C@H](COS(=O)(=O)O)[C@@H](OS(=O)(=O)O)[C@H](OS(=O)(=O)O)[C@@H]3OS(=O)(=O)O)[C@@H]2OS(=O)(=O)O)[C@@H]1OS(=O)(=O)O	AENWAPDCFRFKIF-VQCXRCJVSA-N	FGF1	Homo sapiens									1										1								3.0	2028.98	48.0	14.0	57.0	4.0	0.0	-5.2	929.74	PD082629	-
PD052871	PD052871	COCCOc1ccccc1N1CCN(C(=O)[C@]2(Oc3ccc(C(F)(F)F)cc3)CCCN(C(=O)c3cnccc3C(F)(F)F)[C@@H]2CC(O)CO)CC1	VIVLZPBBGBMFDQ-UJJIYMDQSA-N	MDM2	Homo sapiens									1										1								2.0	754.28	9.0	2.0	12.0	5.0	3.0	4.66	124.9	PD081784	-
PD053316	PD053316	CN[C@@H](C)C(=O)N[C@H](C(=O)N1C[C@H]2CCCN2C[C@H]1C(=O)N[C@@H]1CCOc2ccccc21)c1ccccc1	YNXYDJIBNNPVNX-XFCBJTKFSA-N	BIRC3	Homo sapiens									1										1								2.0	519.28	6.0	3.0	7.0	5.0	2.0	1.77	103.01	PD083369	-
PD053322	ML155	O=S(=O)(c1ccc2ccccc2c1)N1CCN(c2nc(-c3cccs3)nc3ccccc23)CC1	WQARUVRGOHJYJX-UHFFFAOYSA-N	GBA	Homo sapiens					1													1									1.0	486.12	6.0	0.0	4.0	6.0	5.0	5.02	66.4	PD053322	-
PD053439	NVS-PAK1-1	CC(C)NC(=O)N1CC[C@H](NC2=Nc3cc(F)ccc3N(CC(F)F)c3ccc(Cl)cc32)C1	OINGHOPGNMYCAB-INIZCTEOSA-N	PAK1	Homo sapiens				1					1		1			1		1		1	1		1						2.0	479.17	4.0	2.0	4.0	4.0	2.0	5.06	59.97	PD053470	-
PD053441	BAY-299	Cc1cc2c(cc1N1C(=O)c3cccc4c(CCCO)ccc(c34)C1=O)n(C)c(=O)n2C	OFWWWKWUCDUISA-UHFFFAOYSA-N	TAF1L;BRD1;TAF1	Homo sapiens	1	1		1							1					1		1									6.0	429.17	6.0	1.0	4.0	5.0	4.0	3.06	84.54	PD053441	-
PD053443	T-26c	COc1cccc(CNC(=O)c2nc3scc(COCc4ccc(C(=O)O)cc4)c3c(=O)[nH]2)c1	CDQRIIUMNLMHRH-UHFFFAOYSA-N	MMP13	Homo sapiens		1		1			1				1							1									8.0	479.12	7.0	3.0	9.0	4.0	4.0	3.34	130.61	PD053443	-
PD053445	TP-064	CNCCN1CCC(c2cc(CN(C)C(=O)c3cccc(Oc4ccccc4)c3)ccn2)CC1	VUIITYLFSAXKIQ-UHFFFAOYSA-N	CARM1	Homo sapiens				1						1	1					1		1									0.0	458.27	5.0	1.0	9.0	4.0	3.0	4.54	57.7	PD053445	-
PD053447	TP-472	CC(=O)c1cc(-c2cc(C(=O)NC3CC3)ccc2C)c2ncccn12	RPBMXJHQYJLPDN-UHFFFAOYSA-N	BRD9;BRD7	Homo sapiens	1			1							1					1		1			1						2.0	333.15	4.0	1.0	4.0	4.0	3.0	3.4	63.47	PD053447	-
PD053451	A-395	CN(C)[C@H]1CN(C2CCc3cccc(F)c32)C[C@@H]1c1ccc(N2CCN(S(C)(=O)=O)CC2)cc1	REVJNSVNICWODC-KIDMSAQOSA-N	EED	Homo sapiens		1		1						1	1		1			1		1									1.0	486.25	5.0	0.0	5.0	5.0	2.0	2.92	47.1	PD053452	-
PD053453	LLY-283	Nc1ncnc2c1ccn2[C@@H]1O[C@H]([C@H](O)c2ccccc2)[C@@H](O)[C@H]1O	WWOOWAHTEXIWBO-QFRSUPTLSA-N	PRMT5	Homo sapiens				1						1	1					1		1									2.0	342.13	8.0	4.0	3.0	4.0	3.0	0.37	126.65	PD053454	-
PD053457	AZ0108	C[C@H]1Cn2c(nnc2C(C)(F)F)CN1C(=O)c1cccc(C(F)(F)c2n[nH]c(=O)c3ccccc23)c1	NWGMIELHSCQGOG-ZDUSSCGKSA-N	PARP1;PARP2;PARP6	Homo sapiens		1		1								1						1	1		1						4.0	500.16	6.0	1.0	4.0	5.0	4.0	3.81	96.77	PD034876	-
PD053458	AX15836	CCOc1cc(C(=O)N2CCC(N3CCN(C)CC3)CC2)ccc1Nc1ncc2c(n1)N(S(C)(=O)=O)c1ccccc1C(=O)N2C	HTFNVAVTYILUCF-UHFFFAOYSA-N	MAPK7	Homo sapiens		1		1														1			1						2.0	648.28	10.0	1.0	7.0	6.0	3.0	3.16	131.52	PD053458	-
PD053460	MZ1	Cc1ncsc1-c1ccc(CNC(=O)[C@@H]2C[C@@H](O)CN2C(=O)[C@@H](NC(=O)COCCOCCOCCNC(=O)C[C@@H]2N=C(c3ccc(Cl)cc3)c3c(sc(C)c3C)-n3c(C)nnc32)C(C)(C)C)cc1	PTAMRJLIOCHJMQ-PYNGZGNASA-N	BRD2;BRD3;BRD4	Homo sapiens		1		1				1										1				1					4.0	1001.37	15.0	4.0	20.0	7.0	5.0	5.6	211.49	PD053461	-
PD053462	biBET	COc1nnc2ccc(N(C)CCOc3ccc(C4CCN(c5ccc6nnc(OC)n6n5)CC4)cc3)nn12	LQHDIGAYVSAVRJ-UHFFFAOYSA-N	BRDT;BRD2;BRD3;BRD4	Homo sapiens		1		1														1									0.0	530.25	13.0	0.0	9.0	6.0	5.0	2.48	120.33	PD053462	-
PD053466	G-5555	CNc1ncc2cc(-c3ccc(-c4cccc(C)n4)cc3Cl)c(=O)n(CC3OCC(N)CO3)c2n1	ZBCMHWUFWQFPLV-UHFFFAOYSA-N	PAK2;PAK3;PAK1	Homo sapiens		1		1														1									0.0	492.17	9.0	2.0	5.0	5.0	4.0	3.22	117.18	PD053466	-
PD053468	CCT251236	Cc1ccc(NC(=O)c2ccc3c(c2)OCCO3)cc1NC(=O)c1ccc2nc(OCCN3CCCC3)ccc2c1	KLHOCHQJHXNKAS-UHFFFAOYSA-N	PIR	Homo sapiens		1		1												1		1									4.0	552.24	7.0	2.0	8.0	6.0	4.0	5.29	102.02	PD053468	-
PD053472	GSK8814	CO[C@H]1CNC[C@@H](OCC2CCC(F)(F)CC2)[C@@H]1Nc1ncc(-c2cncc(C)c2)c2cc(C)c(=O)[nH]c12	YDPMMWAOCCOULO-JBRSBNLGSA-N	ATAD2;ATAD2B	Homo sapiens	1			1							1					1		1			1						3.0	527.27	7.0	3.0	7.0	5.0	3.0	4.21	101.16	PD053473	-
PD053474	GSK6853	COc1ccccc1C(=O)Nc1cc2c(cc1N1CCNC[C@H]1C)n(C)c(=O)n2C	FQWDVNSBYDXPIO-CQSZACIVSA-N	BRPF1	Homo sapiens	1			1							1					1		1			1						4.0	409.21	7.0	2.0	4.0	4.0	3.0	1.94	80.53	PD053475	-
PD053545	ML385	Cc1ccccc1C(=O)N1CCc2cc(-c3nc(NC(=O)Cc4ccc5c(c4)OCO5)sc3C)ccc21	LINHYWKZVCNAMQ-UHFFFAOYSA-N	NFE2L2	Homo sapiens					1													1									7.0	511.16	6.0	1.0	5.0	6.0	4.0	5.54	80.76	PD053545	-
PD053557	WYE-23?	COC(=O)N1CCC(n2ncc3c(N4CCOCC4)nc(-c4ccc(NC(=O)NC5CC5)cc4)nc32)CC1	NQNFBVOZVJAWSQ-UHFFFAOYSA-N	MTOR	Homo sapiens									1										1		1						4.0	520.25	9.0	2.0	5.0	6.0	3.0	3.02	126.74	PD053557	-
PD053585	NMS-P118	NC(=O)c1cc(F)cc2c1C(=O)N(C1CCN(C3CCC(F)(F)CC3)CC1)C2	ARYVAQSYRLZVQD-UHFFFAOYSA-N	PARP1	Homo sapiens		1		1								1						1	1		1						4.0	395.18	3.0	1.0	3.0	4.0	1.0	2.92	66.64	PD053585	-
PD053850	BAY-678	CC(=O)C1=C(C)N(c2cccc(C(F)(F)F)c2)C(=O)N[C@@H]1c1ccc(C#N)nc1	PGIVGIFOWOVINL-GOSISDBHSA-N	ELANE	Homo sapiens				1			1				1							1									4.0	400.11	4.0	1.0	3.0	3.0	2.0	4.11	86.09	PD102318	-
PD053862	(-)-englerin A	CC1CCC2C1C(OC(=O)C=Cc1ccccc1)C1(C(C)C)CC(OC(=O)CO)C2(C)O1	GACOFEKSDCOVMV-UHFFFAOYSA-N	TRPC5;TRPC4	Homo sapiens		1																1									0.0	442.24	6.0	1.0	6.0	4.0	1.0	3.77	82.06	PD053862	-
PD053887	CPI-1205	COc1cc(C)[nH]c(=O)c1CNC(=O)c1c(C)n([C@H](C)C2CCN(CC(F)(F)F)CC2)c2ccccc12	HPODOLXTMDHLLC-QGZVFWFLSA-N	EZH2	Homo sapiens		1		1														1									1.0	518.25	5.0	2.0	7.0	4.0	3.0	4.72	79.36	PD053888	-
PD053889	NMS-P715	CCc1cccc(CC)c1NC(=O)c1nn(C)c2c1CCc1cnc(Nc3ccc(C(=O)NC4CCN(C)CC4)cc3OC(F)(F)F)nc1-2	JFOAJUGFHDCBJJ-UHFFFAOYSA-N	TTK	Homo sapiens				1					1							1			1		1						1.0	676.31	9.0	3.0	9.0	6.0	4.0	5.82	126.3	PD053889	-
PD053906	Mps1-IN-5	COc1cc(S(C)(=O)=O)ccc1Nc1nc2ccc(-c3ccc(NC(=O)[C@H](C)c4ccc(F)cc4)cc3)cn2n1	NRJKIOCCERLIDG-GOSISDBHSA-N	TTK	Homo sapiens		1																1									1.0	559.17	8.0	2.0	8.0	5.0	5.0	5.43	114.69	PD053907	-
PD053941	SGK1-IN-1	Nc1[nH]nc2nc(-c3ccc(NS(=O)(=O)c4cc(Cl)ccc4F)cc3)cnc12	DDKHTWASHUKHLD-UHFFFAOYSA-N	SGK1	Homo sapiens				1								1				1			1		1						4.0	418.04	6.0	3.0	4.0	4.0	4.0	3.2	126.65	PD053941	-
PD054357	Rapamune	CO[C@H]1C[C@@H]2CC[C@@H](C)[C@@](O)(O2)C(=O)C(=O)N2CCCC[C@H]2C(=O)O[C@H]([C@H](C)C[C@@H]2CC[C@@H](O)[C@H](OC)C2)CC(=O)[C@H](C)C=C(C)[C@@H](O)[C@@H](OC)C(=O)[C@H](C)C[C@H](C)C=CC=CC=C1C	QFJCIRLUMZQUOT-GZKNZQCBSA-N	MTOR	Homo sapiens		1		1								1			1			1	1	1							19.0	913.56	13.0	3.0	6.0	4.0	0.0	6.18	195.43	PD003274	-
PD054633	SRPKIN-1	CCc1cc2c(cc1-c1cccc(S(=O)(=O)F)c1)C(C)(C)c1[nH]c3cc(C#N)ccc3c1C2=O	TWKWEBMGDALHPN-UHFFFAOYSA-N	SRPK2;SRPK1	Homo sapiens			1	1														1					1				2.0	472.13	4.0	1.0	3.0	5.0	4.0	5.8	90.79	PD054633	-
PD054663	RU320521	Cc1nn(-c2nc3ccc(Cl)c(Cl)c3[nH]2)c(O)c1C1OC(=O)c2ccccc21	VIQXILLOJLATEF-UHFFFAOYSA-N	CGAS	Homo sapiens		1																1									1.0	414.03	6.0	2.0	2.0	5.0	4.0	4.33	93.03	PD054663	-
PD055099	SS208	O=C(NCCc1cc(C(=O)NO)no1)c1ccc(Cl)c(Cl)c1	JFGOILLZIAIYGA-UHFFFAOYSA-N	HDAC6	Homo sapiens		1		1														1			1						8.0	343.01	5.0	3.0	5.0	2.0	2.0	2.07	104.46	PD055099	-
PD055914	FLT3-IN-1	Cc1ccc(NC(=O)Nc2nnc(Sc3ncnc4cc(OCCCN5CCOCC5)ccc34)s2)cc1	LKXFSTAQMOENSC-UHFFFAOYSA-N	FLT3	Homo sapiens									1										1								5.0	537.16	10.0	2.0	9.0	5.0	4.0	4.69	114.39	PD055914	-
PD056104	BPR1J-097	CN1CCN(c2ccc(C(=O)Nc3cc(-c4cccc(NS(=O)(=O)c5ccccc5)c4)[nH]n3)cc2)CC1	RRKKHABFIOHAOI-UHFFFAOYSA-N	FLT3	Homo sapiens									1										1		1						4.0	516.19	6.0	3.0	7.0	5.0	4.0	3.88	110.43	PD056104	-
PD056708	AMG-337	C=C1c2cc(OCCOC)cnc2C=CN1C(C)c1nnc2c(F)cc(-c3cnn(C)c3)cn12	WKIALOXOAZXGMG-UHFFFAOYSA-N	MET	Homo sapiens		1		1														1									0.0	461.2	9.0	0.0	7.0	5.0	4.0	3.71	82.6	PD056708	-
PD056877	FM-381	CN(C)C(=O)/C(C#N)=C/c1ccc(-c2nc3cnc4[nH]ccc4c3n2C2CCCCC2)o1	GJMZWYLOARVASY-NTCAYCPXSA-N	JAK3	Homo sapiens		1		1							1			1				1									5.0	428.2	6.0	1.0	4.0	5.0	4.0	4.67	103.74	PD056878	-
PD056879	L-Moses	Cc1nnc2c3ccccc3c(N[C@@H](C)[C@H](c3ccccc3)N(C)C)nn12	MSFPLTWUFWOKBX-IFXJQAMLSA-N	KAT2A;KAT2A,KAT2B;KAT2B	Homo sapiens	1	1		1							1					1		1									1.0	360.21	6.0	1.0	5.0	4.0	4.0	3.69	58.35	PD056880	-
PD056881	2-(Methylamino)triazine 63	CNc1ncnc(-c2cccnc2Oc2ccc(F)c(C(=O)Nc3cc(C(F)(F)F)ccc3N(C)CCCN(C)C)c2)n1	HHKGVQGXRGQBBA-UHFFFAOYSA-N	TEK	Homo sapiens		1		1								1				1		1	1		1						28.0	598.24	9.0	2.0	11.0	4.0	4.0	5.57	108.4	PD056881	-
PD056883	GSK4027	CN1C[C@H](Nc2cnn(C)c(=O)c2Br)C[C@H](c2ccccc2)C1	VZAFGXCWAWRULT-UONOGXRCSA-N	KAT2A,KAT2B;KAT2B;KAT2A	Homo sapiens	1	1		1							1					1		1			1						4.0	376.09	5.0	1.0	3.0	3.0	2.0	2.44	50.16	PD056884	-
PD056973	EED226	CS(=O)(=O)c1ccc(-c2cnc(NCc3ccco3)n3cnnc23)cc1	DYIRSNMPIZZNBK-UHFFFAOYSA-N	EED	Homo sapiens		1		1					1							1		1	1		1						1.0	369.09	8.0	1.0	5.0	4.0	4.0	2.4	102.39	PD056973	-
PD056975	A-1155463	CN(C)CC#Cc1ccc(OCCCc2sc(N3CCc4cccc(C(=O)Nc5nc6ccccc6s5)c4C3)nc2C(=O)O)c(F)c1	SOYCFODXNRVBTI-UHFFFAOYSA-N	BCL2L1	Homo sapiens		1		1			1									1		1			1						5.0	669.19	9.0	2.0	10.0	6.0	5.0	6.33	107.89	PD056975	-
PD056977	UNC2025	CCCCNc1ncc2c(-c3ccc(CN4CCN(C)CC4)cc3)cn(C3CCC(O)CC3)c2n1	MJSHVHLADKXCML-UHFFFAOYSA-N	MERTK;FLT3	Homo sapiens		1		1														1									0.0	476.33	7.0	2.0	8.0	5.0	3.0	4.53	69.45	PD056977	-
PD056982	ACY-738	O=C(NO)c1cnc(NC2(c3ccccc3)CC2)nc1	LIIWIMDSZVNYHY-UHFFFAOYSA-N	HDAC6	Homo sapiens		1		1														1			1						4.0	270.11	5.0	3.0	4.0	3.0	2.0	1.7	87.14	PD056982	-
PD057077	ML352	COc1ccc(C(=O)NCc2cc(C(C)C)no2)cc1OC1CCN(C)CC1	WBLVOWHFRUAMCP-UHFFFAOYSA-N	SLC5A7	Homo sapiens				1	1											1		1			1						1.0	387.22	6.0	1.0	7.0	3.0	2.0	3.21	76.83	PD057077	-
PD057092	AZD-9496	C[C@@H]1Cc2c([nH]c3ccccc23)[C@@H](c2c(F)cc(/C=C/C(=O)O)cc2F)N1CC(C)(C)F	DFBDRVGWBHBJNR-BBNFHIFMSA-N	ESR1	Homo sapiens		1		1					1									1	1		1						4.0	442.19	2.0	2.0	5.0	4.0	3.0	5.63	56.33	PD065232	-
PD057130	DDD85646	Cc1nn(C)c(C)c1NS(=O)(=O)c1c(Cl)cc(-c2ccnc(N3CCNCC3)c2)cc1Cl	XMBSZPZJLPTFMV-UHFFFAOYSA-N	NMT1,NMT2;NMT1;NMT2	Homo sapiens		1		1												1		1			1						5.0	494.11	7.0	2.0	5.0	4.0	3.0	3.62	92.15	PD057130	-
PD057504	S63845	Cc1c(-c2c(-c3ccc(F)o3)sc3ncnc(OC(Cc4ccccc4OCc4ccnn4CC(F)(F)F)C(=O)O)c23)ccc(OCCN2CCN(C)CC2)c1Cl	ZFBHXVOCZBPADE-UHFFFAOYSA-N	MCL1	Homo sapiens		1		1														1									0.0	828.21	12.0	1.0	15.0	7.0	6.0	7.76	128.21	PD057504	-
PD057505	GPR40ant39	CC1(C#N)CN(c2cc(COc3ccc(F)c(F)c3F)nc(-c3ccccn3)n2)C1	QKPUKWQKXUUTOK-UHFFFAOYSA-N	FFAR1	Homo sapiens		1																1									2.0	411.13	6.0	0.0	5.0	4.0	3.0	3.88	74.93	PD057505	-
PD057507	CPI-637	C[C@@H]1CC(=O)Nc2cccc(-c3ccc4c(c3)c(-c3cnn(C)c3)nn4C)c2N1	BFTKDWYIRJGJCA-CYBMUJFWSA-N	EP300;CREBBP;CREBBP,EP300	Homo sapiens		1		1												1		1			1						6.0	386.19	6.0	2.0	2.0	5.0	4.0	3.78	76.77	PD064973	-
PD057592	BAY1217389	COc1ccc(Oc2cc(NCCC(F)(F)F)c3ncc(-c4ccc(C(=O)NC5CC5)c(C)c4)n3n2)c(F)c1F	WNEILUNVMHVMPH-UHFFFAOYSA-N	TTK	Homo sapiens		1																1									1.0	561.18	7.0	2.0	9.0	5.0	4.0	6.04	89.78	PD057592	-
PD057676	VH298	Cc1ncsc1-c1ccc(CNC(=O)[C@@H]2C[C@@H](O)CN2C(=O)[C@@H](NC(=O)C2(C#N)CC2)C(C)(C)C)cc1	NDVQUNZCNAMROD-RZUBCFFCSA-N	VHL	Homo sapiens		1		1														1									3.0	523.23	7.0	3.0	7.0	4.0	2.0	2.53	135.42	PD034889	-
PD057748	GNE-617	O=C(NCc1ccc(S(=O)(=O)c2cc(F)cc(F)c2)cc1)c1ccc2nccn2c1	XRDVXQQZLHVEQZ-UHFFFAOYSA-N	NAMPT	Homo sapiens									1										1		1						2.0	427.08	5.0	1.0	5.0	4.0	4.0	3.38	80.54	PD057748	-
PD057842	ML364	Cc1ccc(S(=O)(=O)Nc2cc(C(F)(F)F)ccc2C(=O)Nc2nc(-c3ccccc3)cs2)cc1	QZUGMNXETPARLI-UHFFFAOYSA-N		-					1													1									0.0	517.07	5.0	2.0	6.0	4.0	4.0	6.19	88.16	PD057842	-
PD057953	(R)-ZINC-3573	CN(C)[C@@H]1CCN(c2cc(-c3ccccc3)nc3ccnn23)C1	XKBSPAZCFAIBJL-OAHLLOKOSA-N	MRGPRX2	Homo sapiens		1		1			1									1		1									1.0	307.18	5.0	0.0	3.0	4.0	3.0	2.54	36.67	PD057954	-
PD057971	GSK2982772	CN1C(=O)[C@@H](NC(=O)c2n[nH]c(Cc3ccccc3)n2)COc2ccccc21	LYPAFUINURXJSG-AWEZNQCLSA-N	RIPK1	Homo sapiens		1		1					1									1	1		1						3.0	377.15	5.0	2.0	4.0	4.0	3.0	1.55	100.21	PD057972	-
PD058004	RO5353	COc1cc(C(N)=O)ccc1NC(=O)[C@@H]1N[C@@H](CC(C)(C)C)[C@@]2(C(=O)Nc3cc(Cl)sc32)[C@H]1c1cccc(Cl)c1F	UOVSZRTTWLJPHE-HNXAPSNLSA-N	MDM2	Homo sapiens		1		1														1									1.0	618.13	6.0	4.0	6.0	5.0	3.0	5.69	122.55	PD058005	-
PD058006	RO2468	COc1cc(C(N)=O)ccc1NC(=O)[C@@H]1N[C@@H](CC(C)(C)C)[C@@]2(C(=O)Nc3cc(Cl)ncc32)[C@H]1c1cccc(Cl)c1F	CGCOPBXAGSCZNX-FNQJWKMRSA-N	MDM2	Homo sapiens		1		1														1									1.0	613.17	6.0	4.0	6.0	5.0	3.0	5.02	135.44	PD058007	-
PD058008	MI-77301	CC(C)(C)C[C@@H]1N[C@@H](C(=O)NC2CCC(O)CC2)[C@H](c2cccc(Cl)c2F)[C@]12C(=O)Nc1cc(Cl)ccc12	IDKAKZRYYDCJDU-AEPXTFJPSA-N	MDM2	Homo sapiens		1		1														1									1.0	561.2	4.0	4.0	4.0	5.0	2.0	5.3	90.46	PD062063	-
PD058009	MI-888	CC(C)(C)C[C@@H]1N[C@@H](C(=O)NC2CC(C)(O)C2)[C@H](c2cccc(Cl)c2F)[C@]12C(=O)Nc1cc(Cl)ccc12	MZBOZBMARIQZGX-VVWWDXNASA-N	MDM2	Homo sapiens		1		1														1									0.0	547.18	4.0	4.0	4.0	5.0	2.0	4.91	90.46	PD058010	-
PD058013	KI-696	COc1cc([C@@H](CC(=O)O)c2ccc(C)c(CN3C[C@@H](C)Oc4ccccc4S3(=O)=O)c2)cc2nnn(C)c12	ZDNGJXBUEQNFBQ-GCJKJVERSA-N	KEAP1	Homo sapiens		1		1												1		1			1						5.0	550.19	8.0	1.0	7.0	5.0	4.0	3.86	123.85	PD058014	-
PD058015	AM-6761	CC(C)(C)S(=O)(=O)C[C@H](C1CC1)N1C(=O)[C@@](C)(Cc2ncc(CC(=O)O)s2)C[C@H](c2cccc(Cl)c2)[C@H]1c1ccc(Cl)c(F)c1	HNLHOKSDTBAERS-CWIPYCOQSA-N	MDM2	Homo sapiens		1		1					1			1						1	1		1						1.0	694.15	6.0	1.0	10.0	5.0	3.0	7.51	104.64	PD058016	-
PD058017	GNE-2861	Nc1nccc(-n2c(NCCO)nc3ccc(C#CC4(O)CCCCC4)cc32)n1	CABIRTYDGXRTRM-UHFFFAOYSA-N	PAK4;PAK6;PAK5	Homo sapiens		1																1									0.0	392.2	8.0	4.0	4.0	4.0	3.0	1.85	122.11	PD058017	-
PD058145	GI-181771X	CC(C)N(C(=O)CN1C(=O)[C@H](NC(=O)Nc2cccc(C(=O)O)c2)C(=O)N(c2ccccc2)c2ccccc21)c1ccccc1	CABBMMXFOOZVMS-PMERELPUSA-N	CCKBR	Homo sapiens												1							1		1						2.0	605.23	5.0	3.0	8.0	5.0	4.0	5.03	139.36	PD058146	-
PD058722	Savolitinib	C[C@@H](c1ccc2nccn2c1)n1nnc2ncc(-c3cnn(C)c3)nc21	XYDNMOZJKOGZLS-NSHDSACASA-N	MET	Homo sapiens									1										1		1						1.0	345.15	9.0	0.0	3.0	5.0	5.0	1.88	91.61	PD058723	-
PD058842	GDC-0810	CC/C(=C(/c1ccc(/C=C/C(=O)O)cc1)c1ccc2[nH]ncc2c1)c1ccc(F)cc1Cl	BURHGPHDEVGCEZ-KJGLQBJMSA-N	ESR1	Homo sapiens									1										1								6.0	446.12	2.0	2.0	6.0	4.0	4.0	6.82	65.98	PD058843	-
PD058973	AZD-5672	CCN(C(=O)Cc1ccc(S(C)(=O)=O)cc1)C1CCN(CC[C@H](c2ccc(S(C)(=O)=O)cc2)c2cc(F)cc(F)c2)CC1	SCXSQUUTGCWHFU-WJOKGBTCSA-N	CCR5	Homo sapiens									1			1							1		1						3.0	632.22	6.0	0.0	11.0	4.0	3.0	4.85	91.83	PD058974	-
PD059488	Compound 4-D	Oc1ccc([C@H]2Sc3cc(O)ccc3O[C@H]2c2ccc(OCCN3CCCCC3)cc2)cc1	TWZNCTCQAGRUGQ-RRPNLBNLSA-N	ESR1	Homo sapiens									1										1		1						3.0	463.18	6.0	2.0	6.0	5.0	3.0	5.93	62.16	PD041096	-
PD059579	PD059579	CC(C)C[C@H](N=C(O)c1cc2ccccc2o1)C(O)=N[C@H]1CCCN(S(=O)(=O)c2ccccn2)CC1=O	VBPPNJCVXGAZDD-PMACEKPBSA-N	CTSK	Homo sapiens									1										1		1						5.0	526.19	7.0	2.0	8.0	4.0	3.0	3.93	145.66	PD041735	-
PD060024	Compound 18	C[C@@H](COc1ccc([C@@H]2Oc3ccc(O)cc3S[C@@H]2c2ccc(O)cc2)cc1)N1CCCC1	UZOOIPXOYYJULJ-RHLLTPQKSA-N	ESR1	Homo sapiens									1										1								2.0	463.18	6.0	2.0	6.0	5.0	3.0	5.93	62.16	PD042381	-
PD060558	ELEUTHEROBIN	CO[C@]12C=C[C@](C)(O1)[C@@H](OC(=O)/C=C/c1cn(C)cn1)C[C@H]1C(C)=CC[C@H](C(C)C)[C@H]1/C=C\2CO[C@@H]1OC[C@@H](O)[C@@H](O)[C@@H]1OC(C)=O	XOPYFXBZMVTEJF-PDACKIITSA-N	TUBA1A,TUBA1B,TUBA1C,TUBA3C,TUBA3E,TUBA4A,TUBB,TUBB1,TUBB2A,TUBB2B,TUBB3,TUBB4A,TUBB4B,TUBB6,TUBB8	Homo sapiens		1																1									0.0	656.33	12.0	2.0	9.0	5.0	1.0	3.24	147.8	PD060559	-
PD060560	bistratene A	CC=CC(=O)CC1CCC(C)C(CC(=O)NCC(O)C(C)C(=O)NCCCC2OC3(CCCC(CCC(C)C=C(C)C(C)O)O3)CCC2C)O1	HXZRMADPDYFMEB-UHFFFAOYSA-N	ACTG2	Homo sapiens		1		1														1									0.0	704.5	8.0	4.0	18.0	3.0	0.0	5.93	143.42	PD060560	-
PD060562	KZR-504	C[C@]1(C(=O)[C@H](Cc2ccccc2)NC(=O)[C@H](CO)NC(=O)c2cccc(=O)[nH]2)CO1	QYDASSGXBXGRBS-CKJXQJPGSA-N	PSMB9	Homo sapiens		1		1												1		1									4.0	413.16	6.0	4.0	9.0	3.0	2.0	-0.45	140.89	PD058012	-
PD060563	CID 129009723	CCCCCCCCCCCCC(=O)c1c(O)c(OC)c(OC)[nH]c1=O	CZKPAGLXQOQNEI-UHFFFAOYSA-N	SDHC	Homo sapiens		1																1									0.0	367.24	5.0	2.0	14.0	1.0	1.0	4.59	88.62	PD060563	-
PD060565	Cotransin	CC(C)C[C@@H]1NC(=O)[C@H](Cc2ccccc2)N(C)C(=O)[C@H](CC(C)C)NC(=O)[C@H](CC(C)C)N(C)C(=O)[C@H](CC(C)C)NC(=O)[C@@H](C)OC(=O)[C@H](C)N(C)C1=O	LTYNXERAWVCPAH-OHRKNAERSA-N	SEC61A1	Homo sapiens		1																1									0.0	784.51	8.0	3.0	10.0	2.0	1.0	3.31	174.53	PD060566	-
PD060725	NI-42	[C-]#[N+]c1ccc(S(=O)(=O)Nc2ccc3c(c2)cc(C)c(=O)n3C)cc1	ZLTQCDRXWXUYHJ-UHFFFAOYSA-N	BRPF1;BRD1;BRPF3	Homo sapiens		1																1									0.0	353.08	4.0	1.0	3.0	3.0	3.0	3.2	72.53	PD060725	-
PD060936	SKI-73	COc1ccc(CCNC(=O)[C@H](CC[C@H](CNCc2ccccc2)C[C@H]2O[C@@H](n3cnc4c(N)ncnc43)[C@H](O)[C@@H]2O)NC(=O)CC(C)(C)C2=C(C)C(=O)C(C)=C(C)C2=O)cc1	HZHUKQLWLNDVDZ-IBDVCRJISA-N	CARM1	Homo sapiens				1						1	1					1		1								1	0.0	850.44	14.0	6.0	19.0	6.0	4.0	3.68	232.91	PD060937	-
PD060938	BAY-850	COc1cc(Cl)c(C(=O)N[C@@H](CN[C@H]2CC[C@@H](N)CC2)Cc2ccc(C#N)cc2)cc1-c1ccc(CN[C@H](C)c2ccc(C)cc2)o1	BSISGUIVBKDTQO-QIKYYPRYSA-N	ATAD2B;ATAD2	Homo sapiens	1			1							1					1		1									1.0	653.31	7.0	4.0	13.0	5.0	4.0	6.84	125.34	PD060939	-
PD061142	CAY10717	COC(=O)c1cc2cc(NCc3cc(NC(=O)c4cc(-n5cnc(C)c5)cc(C(F)(F)F)c4)ccc3C)cnc2[nH]1	PGQWALGGBUYLQF-UHFFFAOYSA-N	BCR;ABL1,BCR	Homo sapiens									1										1		1						12.0	562.19	7.0	3.0	7.0	5.0	5.0	6.04	113.93	PD061142	-
PD061158	BAY-876	Cc1c(NC(=O)c2cc(C(N)=O)nc3cc(F)ccc23)c(C(F)(F)F)nn1Cc1ccc(C#N)cc1	BKLJDIJJOOQUFG-UHFFFAOYSA-N	SLC2A1	Homo sapiens				1			1				1							1			1						6.0	496.13	6.0	2.0	5.0	4.0	4.0	4.17	126.69	PD061158	-
PD061196	A-1331852	Cc1c(-c2ccc(N3CCc4cccc(C(=O)Nc5nc6ccccc6s5)c4C3)nc2C(=O)O)cnn1CC12CC3CC(CC(C3)C1)C2	QCQQONWEDCOTBV-UHFFFAOYSA-N	BCL2L1	Homo sapiens		1																1									2.0	658.27	8.0	2.0	7.0	10.0	5.0	7.59	113.24	PD061196	-
PD062189	PT-2385	CS(=O)(=O)c1ccc(Oc2cc(F)cc(C#N)c2)c2c1[C@H](O)C(F)(F)C2	ONBSHRSJOPSEGS-INIZCTEOSA-N	EPAS1	Homo sapiens		1		1												1		1			1						3.0	383.04	5.0	1.0	3.0	3.0	2.0	3.12	87.39	PD062190	-
PD062199	PKI-179	O=C(Nc1ccncc1)Nc1ccc(-c2nc(N3CCOCC3)nc(N3C4CCC3COC4)n2)cc1	WXUUCRLKXQMWRY-UHFFFAOYSA-N	MTOR	Homo sapiens									1										1								6.0	488.23	9.0	2.0	5.0	6.0	3.0	2.78	117.63	PD062199	-
PD062303	CHEMBL448620	COC(=O)C1=C(C)NC(C)=C(C(=O)NCCCN2CCC(c3ccccc3)(c3ccccc3)CC2)C1c1ccc([N+](=O)[O-])cc1	FIIXCJGBCCCOQQ-UHFFFAOYSA-N	ADRA1A	Homo sapiens												1							1		1						9.0	608.3	7.0	2.0	10.0	5.0	3.0	5.59	113.81	PD062303	-
PD062492	MK8033	Cn1cc(-c2cnc3ccc4ccc(CS(=O)(=O)NCc5ccccn5)cc4c(=O)c3c2)cn1	VMJFTOSOFDEKTM-UHFFFAOYSA-N	MET;MST1R	Homo sapiens		1		1														1			1						5.0	471.14	7.0	1.0	6.0	5.0	5.0	3.16	106.84	PD062492	-
PD062700	KHK-IN-1	CSc1ccccc1Nc1nc(N2CCNCC2)nc2c(NCC3CC3)ncnc12	HFLMLZKGLUEWBU-UHFFFAOYSA-N	KHK	Homo sapiens				1								1				1			1		1						1.0	422.2	9.0	3.0	7.0	5.0	3.0	3.12	90.89	PD062700	-
PD063066	NVP-CGM097	COc1cc2c(cc1OC(C)C)[C@H](c1ccc(Cl)cc1)N(c1ccc(N(C)C[C@H]3CC[C@H](N4CCN(C)C(=O)C4)CC3)cc1)C(=O)C2	CLRSLRWKONPSRQ-IIPSPAQQSA-N	MDM2	Homo sapiens									1							1			1								4.0	658.33	6.0	0.0	9.0	6.0	3.0	6.58	65.56	PD063067	-
PD063235	AV-412	C=CC(=O)Nc1cc2c(Nc3ccc(F)c(Cl)c3)ncnc2cc1C#CC(C)(C)N1CCN(C)CC1	ZAJXXUDARPGGOC-UHFFFAOYSA-N	EGFR	Homo sapiens									1										1		1						2.0	506.2	6.0	2.0	5.0	4.0	3.0	4.67	73.39	PD063235	-
PD063263	BMS 688521	CN1C(=O)N(c2cc(Cl)cc(Cl)c2)C(=O)[C@]12CN(c1ccc(C(=O)O)cn1)C[C@H]2c1ccc(C#N)cc1	LILGMDXLRPEBNH-HFZDXXHNSA-N	ITGAL	Homo sapiens												1							1		1						1.0	535.08	6.0	1.0	4.0	5.0	3.0	4.4	117.84	PD063264	-
PD063288	BI 224436	Cc1nc2ccccc2c(-c2ccc3c4c(ccnc24)CCO3)c1[C@H](OC(C)(C)C)C(=O)O	MIXIIJCBELCMCZ-VWLOTQADSA-N		Human immunodeficiency virus 1				1				1										1									1.0	442.19	5.0	1.0	4.0	5.0	4.0	5.63	81.54	PD118324	-
PD063634	ASTRAGALIN	O=c1c(O[C@@H]2O[C@H](CO)[C@@H](O)[C@H](O)[C@H]2O)c(-c2ccc(O)cc2)oc2cc(O)cc(O)c12	JPUKWEQWGBDDQB-QSOFNFLRSA-N	CA12	Homo sapiens									1										1								9.0	448.1	11.0	7.0	4.0	4.0	3.0	-0.24	190.28	PD086921	-
PD063636	Luteoloside	O=c1cc(-c2ccc(O)c(O)c2)oc2cc(O[C@@H]3O[C@H](CO)[C@@H](O)[C@H](O)[C@H]3O)cc(O)c12	PEFNSGRTCBGNAN-QNDFHXLGSA-N	IL2	Homo sapiens									1										1								7.0	448.1	11.0	7.0	4.0	4.0	3.0	-0.24	190.28	PD056577	-
PD063714	MLi-2	C[C@H]1CN(c2cc(-c3n[nH]c4ccc(OC5(C)CC5)cc34)ncn2)C[C@@H](C)O1	ATUUNJCZCOMUKD-OKILXGFUSA-N	LRRK2	Homo sapiens		1		1			1											1			1						11.0	379.2	6.0	1.0	4.0	5.0	3.0	3.56	76.16	PD063715	-
PD063763	KINETIN RIBOSIDE	OC[C@H]1O[C@@H](n2cnc3c(NCc4ccco4)ncnc32)[C@H](O)[C@@H]1O	CAGLGYNQQSIUGX-SDBHATRESA-N	ADORA3	Homo sapiens									1										1		1						6.0	347.12	10.0	4.0	5.0	4.0	3.0	-0.36	138.69	PD088714	-
PD064112	A-485	CNC(=O)Nc1ccc2c(c1)CC[C@@]21OC(=O)N(CC(=O)N(Cc2ccc(F)cc2)[C@@H](C)C(F)(F)F)C1=O	VRVJKILQRBSEAG-LFPIHBKWSA-N	EP300;CREBBP;CREBBP,EP300	Homo sapiens		1		1			1				1					1		1			1						8.0	536.17	5.0	2.0	6.0	4.0	2.0	3.68	108.05	PD064113	-
PD064213	XMD8-87	COc1cc(N2CCN(C)CC2)ccc1Nc1ncc2c(n1)N(C)c1ccccc1C(=O)N2	LGLHCXISMKHLIK-UHFFFAOYSA-N	TNK2	Homo sapiens		1	1	1										1				1									4.0	445.22	8.0	2.0	4.0	5.0	3.0	3.31	85.86	PD064213	-
PD064248	CI 1020	COc1ccc(C2(O)OC(=O)C(c3ccc4c(c3)OCO4)=C2Cc2cc(OC)c(OC)c(OC)c2)cc1	PWIPORDFWDZCJG-UHFFFAOYSA-N	EDNRA	Homo sapiens												1							1		1						2.0	506.16	9.0	1.0	8.0	5.0	3.0	3.85	101.91	PD064248	-
PD064249	CHEMBL80236	CC(/C=C/[C@H]1CCC[C@@H]1c1ccc2c(c1)C(C)(C)CCC2(C)C)=C\C(=O)O	HOAYGRVRYIUNNV-HOMFKRFTSA-N	RXRA	Homo sapiens												1							1		1						5.0	366.26	1.0	1.0	4.0	3.0	1.0	6.51	37.3	PD064250	-
PD064251	CHEMBL71723	NC[C@@H]1CCC[C@H](CNC(=O)[C@H](Cc2c[nH]c3ccccc23)NC(=O)N2CCC3(C=Cc4ccccc43)CC2)C1	DAMXHAMKVXERLM-QEGDFHJFSA-N	SSTR1	Homo sapiens												1							1		1						5.0	539.33	3.0	4.0	7.0	6.0	3.0	4.73	103.25	PD054933	1
PD064435	CHEMBL305279	NCC1CCCC(CNC(=O)[C@H](Cc2c[nH]c3ccccc23)NC(=O)N2CCC3(C=Cc4ccccc43)CC2)C1	DAMXHAMKVXERLM-YFIBMDDPSA-N	SSTR2	Homo sapiens												1							1		1						5.0	539.33	3.0	4.0	7.0	6.0	3.0	4.73	103.25	PD054933	1
PD064252	CHEMBL69715	NC(=O)C(=O)C(Cc1ccccc1)NC(=O)C1CCN(C(=O)c2ccc3ccccc3c2)CC1	DZIIGLSFYBYZIA-UHFFFAOYSA-N	CAPN1	Homo sapiens												1							1		1						2.0	457.2	4.0	2.0	7.0	4.0	3.0	2.47	109.57	PD064252	-
PD064254	CHEMBL64246	CCC1([C@@H](O)C/C=C/[C@H]2[C@H](O)C[C@@H](Cl)[C@@H]2C/C=C\CCCC(=O)O)CCC1	LBIPUBVVGYRBNA-VGUVCEGPSA-N	PTGER2	Homo sapiens												1							1		1						3.0	398.22	3.0	3.0	11.0	2.0	0.0	4.68	77.76	PD064255	-
PD064256	CHEMBL63861	O=C(O)Cn1c(=O)c(=O)[nH]c2cc([N+](=O)[O-])c(-n3ccc(CN4CCN(Cc5ccccc5)CC4)c3)cc21	UWBHJOVXAJRYJM-UHFFFAOYSA-N	GRIK1	Homo sapiens												1							1		1						4.0	518.19	9.0	2.0	8.0	5.0	4.0	1.79	146.71	PD064256	-
PD064258	CHEMBL605580	Nc1nc2[nH]c(CCCCCc3ccc(C(=O)N[C@@H](CCC(=O)O)C(=O)O)s3)cc2c(=O)[nH]1	NDMAMOPJTVHRPP-AWEZNQCLSA-N	SLC46A1	Homo sapiens												1							1								2.0	475.15	7.0	6.0	12.0	3.0	3.0	1.9	191.26	PD064259	-
PD064260	CHEMBL603956	CC(C)c1nc2c(Cl)cccn2c1-c1cccc(Oc2cccc(S(C)(=O)=O)c2)c1	NKFDLBSCCAQKKW-UHFFFAOYSA-N	NR1H3	Homo sapiens												1							1		1						2.0	440.1	5.0	0.0	5.0	4.0	4.0	5.97	60.67	PD064260	-
PD064262	CHEMBL576258	NC1=N[C@](c2ccc(OC(F)(F)F)cc2)(c2cccc(-c3cccnc3F)c2)C2=NCCCN12	OPSMDCTXTURNQW-HSZRJFAPSA-N	BACE1	Homo sapiens												1							1		1						4.0	469.15	6.0	1.0	4.0	5.0	3.0	4.46	76.1	PD064263	-
PD064264	CHEMBL575741	c1ccc2c(c1)CC(Nc1nc(Nc3ccncc3)nc(N3CCNCC3)n1)C2	IINABGAHVLQZSP-UHFFFAOYSA-N	ROCK1	Homo sapiens												1							1								1.0	388.21	8.0	3.0	5.0	5.0	3.0	2.0	90.89	PD064264	-
PD064266	CHEMBL570296	CCCNCc1ccc(CCn2ccc(OCc3ccc(F)cc3)cc2=O)cc1	YYCDRZDDLBLWPS-UHFFFAOYSA-N	MCHR1	Homo sapiens												1							1		1						2.0	394.21	4.0	1.0	10.0	3.0	3.0	4.31	43.26	PD064266	-
PD064268	CHEMBL570274	C[C@@H]1CNCCN1c1ccc(=O)n(CCOc2ccccc2C(F)(F)F)n1	RUBIIBKQQMGNHO-CYBMUJFWSA-N	HTR2C	Homo sapiens												1							1		1						3.0	382.16	6.0	1.0	5.0	3.0	2.0	2.14	59.39	PD064269	-
PD064270	CHEMBL56438	O=C1CC2(CCCC2)CC(=O)N1CCN1CCN(c2cc(Cl)ccc2Cl)CC1	LAZUXKZZDKCHKK-UHFFFAOYSA-N	ADRA1D	Homo sapiens												1							1								4.0	423.15	4.0	0.0	4.0	4.0	1.0	3.82	43.86	PD064270	-
PD064272	CHEMBL556949	CC(C)NCc1ccc(C[C@@H]2NC(=O)[C@@H](Cc3c[nH]c4ccccc34)NC(=O)[C@H](Cc3ccccc3)NC(=O)[C@H](Cc3ccccc3)NC(=O)[C@H](CCCCN)NC(=O)[C@@H](NC(=O)[C@@H](N)Cc3ccc(O)cc3)CSSC[C@@H](C(=O)O)NC(=O)[C@H](CO)NC(=O)[C@H]([C@@H](C)O)NC(=O)[C@H](Cc3ccccc3)NC(=O)[C@H]([C@@H](C)O)NC2=O)cc1	UKGIKHPFMXOGRF-RABWJYHCSA-N	SSTR1	Homo sapiens												1							1								1.0	1647.73	21.0	20.0	25.0	8.0	7.0	0.15	518.18	PD064273	-
PD064274	SILVESTROL	COC(=O)[C@@H]1[C@@H](c2ccccc2)[C@]2(c3ccc(OC)cc3)Oc3cc(O[C@@H]4O[C@@H]([C@H](O)CO)CO[C@H]4OC)cc(OC)c3[C@]2(O)[C@@H]1O	GVKXFVCXBFGBCD-QKDMMWSPSA-N	EIF4A1	Homo sapiens									1			1							1		1						1.0	654.23	13.0	4.0	10.0	6.0	3.0	1.57	171.83	PD118662	-
PD064276	CHEMBL555146	C[C@@H]1CCCN1CCc1cc2cc(C(=O)c3ccc(F)cc3)ccc2o1	VGSYEFOBFMUWGO-OAHLLOKOSA-N	HRH3	Homo sapiens												1							1		1						12.0	351.16	3.0	0.0	5.0	4.0	3.0	4.83	33.45	PD064277	-
PD064278	CHEMBL552338	O=C(c1ccccc1C(F)(F)F)N(CC1CCC1)[C@H]1CCNC1	SWADTMSKMJUFBO-ZDUSSCGKSA-N	SLC6A2	Homo sapiens												1							1		1						8.0	326.16	2.0	1.0	4.0	3.0	1.0	3.31	32.34	PD064279	-
PD064280	CHEMBL526648	CC(=O)c1ccc(N2CCN(C(=O)c3cc(S(C)(=O)=O)ccc3N3CCOCC3)CC2)c(F)c1	TUPJMQWUSDJIDL-UHFFFAOYSA-N	SLC6A9	Homo sapiens												1							1		1						1.0	489.17	7.0	0.0	5.0	4.0	2.0	2.23	87.23	PD064280	-
PD064282	CHEMBL526566	C[C@H]1C[C@H]2[C@@H]3CCC4=CC(=O)C=C[C@]4(C)[C@@]3(F)[C@@H](O)C[C@]2(C)[C@@]1(OC(=O)NCC(C)(C)C)C(=O)CO	QIOJSKJMCPAOBC-XYWKZLDCSA-N	MMP1	Homo sapiens												1							1		1						2.0	505.28	6.0	3.0	4.0	4.0	0.0	3.68	112.93	PD064283	-
PD064284	CHEMBL522771	Cc1ncsc1C(=O)N(Cc1cc(=O)[nH]c2c(F)cccc12)c1cccc(Cl)c1	UNXUBXXLEVFSIH-UHFFFAOYSA-N	NOS2	Homo sapiens												1							1		1						7.0	427.06	4.0	1.0	4.0	4.0	4.0	4.93	66.06	PD064284	-
PD064286	CHEMBL522432	Cn1c(C#N)ccc1-c1ccc2c(c1)C(C)(c1ccsc1)OCC(=O)N2	OPPYDCXBDREGJT-UHFFFAOYSA-N	PGR	Homo sapiens												1							1		1						4.0	363.1	5.0	1.0	2.0	4.0	3.0	3.86	67.05	PD064286	-
PD064288	CHEMBL520308	Cc1cc2c(-c3ccc(S(=O)(=O)N(C)CCO)cc3)ccnc2[nH]1	FKJNWJPAAVSRNX-UHFFFAOYSA-N	IKBKB	Homo sapiens									1			1							1		1						4.0	345.11	4.0	2.0	5.0	3.0	3.0	2.15	86.29	PD064288	-
PD064290	CHEMBL517743	O=C1NCc2c1c1c(c3c2c2ccccc2n3CCO)CCc2cc(OC3CCCC3)ccc2-1	FNZIPRHNOOCRHH-UHFFFAOYSA-N	MAP3K9	Homo sapiens												1							1								1.0	452.21	4.0	2.0	4.0	7.0	4.0	5.12	63.49	PD064290	-
PD064292	CHEMBL498486	COc1ccc(-c2oc3c(CC=C(C)C)c(OCCO)cc(O)c3c(=O)c2OCCO)cc1	WTJGVHRGWYENBZ-UHFFFAOYSA-N	PDE5A	Homo sapiens												1							1		1						2.0	456.18	8.0	3.0	10.0	3.0	3.0	3.43	118.59	PD064292	-
PD064294	CHEMBL496138	CCc1ccc(Cc2cc([C@@H]3O[C@H](CO)[C@@H](O)[C@H](O)[C@H]3O)ccc2Cl)cc1	QPNWHIMAZBIEMR-ADAARDCZSA-N	SLC5A2	Homo sapiens												1							1		1						2.0	392.14	5.0	4.0	5.0	3.0	2.0	2.01	90.15	PD064295	-
PD064296	CHEMBL495990	C#CCOc1cc(COc2ccc(C(F)(F)F)cc2)ccc1Sc1ccc(OCC(=O)O)c2c1CCCC2	ZCORSQTXEMWYOI-UHFFFAOYSA-N	PPARD	Homo sapiens												1							1		1						3.0	542.14	5.0	1.0	10.0	4.0	3.0	6.79	64.99	PD064296	-
PD064298	CHEMBL491604	COc1ccc2cc(-c3cccc(C=O)c3)cc(CCNC(C)=O)c2c1	UPVFDHUOFQXFQX-UHFFFAOYSA-N	MTNR1B	Homo sapiens												1							1		1						2.0	347.15	3.0	1.0	6.0	3.0	3.0	4.01	55.4	PD064298	-
PD064300	CHEMBL491228	NC(=O)c1ccc(-c2ccc(Oc3cncc4sc(-c5nn[nH]n5)cc34)cc2)cc1	NCPSMBVBKJXJPP-UHFFFAOYSA-N	MAP3K8	Homo sapiens												1							1								4.0	414.09	7.0	2.0	5.0	5.0	5.0	4.03	119.67	PD064300	-
PD064302	CHEMBL483991	CC(C)c1nccc2c1c(Sc1ccc(Cl)c(Cl)c1)c1n2CC[C@@H]1CC(=O)O	LUZBJNWFEDHIPR-GFCCVEGCSA-N	PTGDR	Homo sapiens												1							1		1						6.0	434.06	4.0	1.0	5.0	4.0	3.0	6.58	55.12	PD064303	-
PD064304	CHEMBL48029	c1ccc(COc2ccc(CCNc3ccncc3)cc2)cc1	WPBRSJXCRWSAHJ-UHFFFAOYSA-N	GRIN2B	Homo sapiens												1							1								3.0	304.16	3.0	1.0	7.0	3.0	3.0	4.32	34.15	PD064304	-
PD064306	CHEMBL478834	CCOC(=O)N(Cc1ccccc1-c1ccccc1)[C@H]1CCNC1	DRWJMJVERMOJBX-SFHVURJKSA-N	SLC6A2	Homo sapiens												1							1		1						6.0	324.18	3.0	1.0	5.0	3.0	2.0	3.67	41.57	PD064307	-
PD064308	CHEMBL470226	CS(=O)(=O)c1ccc(NC(=O)c2cc3ccccc3oc2=O)cc1	QJBHODZBXYTRMA-UHFFFAOYSA-N	MAOB	Homo sapiens												1							1		1						2.0	343.05	5.0	1.0	3.0	3.0	3.0	2.45	93.45	PD064308	-
PD064310	CHEMBL468176	Fc1ccc(-c2noc(C3CCN(c4cnc5ccc(Cl)cc5c4)CC3)n2)c(Cl)c1	KZPYBMNBUZPMKP-UHFFFAOYSA-N	CNR2	Homo sapiens												1							1		1						3.0	442.08	5.0	0.0	3.0	5.0	4.0	6.11	55.05	PD064310	-
PD064312	CHEMBL461571	Cc1c(C(=O)c2ccc(Cl)cc2)c2ccc(OC(F)(F)F)cc2n1Cc1cccc(O[C@H](C)C(=O)O)c1	DHUATBAZHILHIC-MRXNPFEDSA-N	PPARG	Homo sapiens												1							1		1						28.0	531.11	5.0	1.0	8.0	4.0	4.0	6.63	77.76	PD064313	-
PD064314	CHEMBL460480	CCn1cc(CN2CCN(c3cccc4[nH]c(-c5ccc(C(C)(C)C)cc5)nc34)CC2)c(=O)[nH]c1=O	YJBAGQATRBRFBC-UHFFFAOYSA-N	GNRHR	Homo sapiens												1							1		1						2.0	486.27	6.0	2.0	5.0	5.0	4.0	3.72	90.02	PD064314	-
PD064316	CHEMBL457992	CNS(=O)(=O)c1ccc2cccc(CCNC(=O)c3ccco3)c2c1	ZMQJWTSYMGTHFB-UHFFFAOYSA-N	NQO2	Homo sapiens												1							1		1						3.0	358.1	4.0	2.0	6.0	3.0	3.0	2.31	88.41	PD064316	-
PD064318	CHEMBL449121	Cc1[nH]n(-c2ccc(OC(F)(F)F)cc2)c(=O)c1C1(C(F)(F)F)C(=O)N(c2ccccc2)C2=C1C(=O)CC(C)(C)C2	XLEVMSDNWOWFNX-UHFFFAOYSA-N	ELOVL6	Homo sapiens				1								1				1			1		1						2.0	579.16	5.0	1.0	4.0	5.0	3.0	5.86	84.4	PD064318	-
PD064320	CHEMBL413825	C[C@@H]1NC(=O)[C@@H]([C@@H](C)O)NC(=O)CNC(=O)[C@@H](Cc2c[nH]cn2)NC(=O)[C@H](Cc2c[nH]c3ccccc23)NC(=O)[C@@H](CC(N)=O)NC(=O)CNC(=O)[C@H](CC(=O)N[C@@H](Cc2c[nH]c3ccccc23)C(=O)N[C@@H](Cc2ccccc2)C(=O)N[C@@H](Cc2ccccc2)C(=O)N[C@@H](CC(N)=O)C(=O)N[C@@H](Cc2ccc(O)cc2)C(=O)N[C@@H](Cc2ccc(O)cc2)C(=O)N[C@@H](Cc2c[nH]c3ccccc23)C(=O)O)NC(=O)[C@H]2CCCN2C1=O	VWFLFTLWXQPVNV-SYUZYMOHSA-N	EDNRB	Homo sapiens												1							1								2.0	2041.85	23.0	25.0	37.0	13.0	11.0	-2.33	717.03	PD064321	-
PD064322	CHEMBL408891	CCC[C@H](NC(=O)[C@H](CCCN=C(N)N)NC(=O)[C@@H](N)Cc1c[nH]c2ccccc12)C(=O)N[C@@H](CCCN=C(N)N)C(=O)N[C@@H](Cc1ccc(O)cc1)C(=O)N[C@@H](Cc1c[nH]c2ccccc12)C(=O)N[C@@H](CCCN=C(N)N)C(=O)N[C@@H](CCC)C(=O)N[C@@H](CCCN=C(N)N)C(=O)N[C@@H](Cc1ccc(O)cc1)C(N)=O	QTWWWOBSQULXHE-MTVPJWGZSA-N	NPY4R	Homo sapiens												1							1								3.0	1537.85	17.0	23.0	47.0	6.0	6.0	-2.68	660.65	PD064323	-
PD064324	CHEMBL405282	CSCC[C@H](NC(=O)[C@@H](NC(=O)[C@@H](N)Cc1ccc(O)cc1)C(C)C)C(=O)NCC(=O)N[C@@H](Cc1c[nH]cn1)C(=O)N[C@@H](Cc1ccccc1)C(=O)N[C@@H](CCCN=C(N)N)C(=O)N[C@H](Cc1c[nH]c2ccccc12)C(=O)N[C@@H](CC(=O)O)C(=O)N[C@@H](CCCN=C(N)N)C(=O)N[C@@H](Cc1ccccc1)C(=O)NCC(=O)O	GZWUQPQBOGLSIM-MDMVXOTPSA-N	MC3R	Homo sapiens												1							1		1			1			4.0	1569.73	19.0	21.0	47.0	6.0	6.0	-2.89	614.22	PD064325	-
PD064327	CHEMBL402207	C[N+]1(CCCC(O)(c2ccccc2)c2ccccc2)CCC(C2CC[N+](C)(CCCC(O)(c3ccccc3)c3ccccc3)CC2)CC1	PKERJUIAPINEEV-UHFFFAOYSA-N	CHRM4	Homo sapiens												1							1								2.0	646.45	2.0	2.0	13.0	6.0	4.0	8.13	40.46	PD064327	-
PD064328	CHEMBL401473	CCNc1cc(C(=O)N[C@@H](Cc2ccccc2)[C@H](O)CNCc2cccc(C(F)(F)F)c2)cc(N2CCCCS2(=O)=O)c1	GPMRAYXRPZKTFK-URLMMPGGSA-N	BACE1	Homo sapiens												1							1		1						3.0	618.25	6.0	4.0	12.0	4.0	3.0	4.56	110.77	PD064329	-
PD064330	CHEMBL398606	CC(C)NCc1ccc(Nc2cc(-c3ccc(-c4ccc(O)cc4O)cc3)[nH]n2)cc1	MYHOUKHXSVKHBA-UHFFFAOYSA-N	CHEK1	Homo sapiens												1							1		1						13.0	414.21	5.0	5.0	7.0	4.0	4.0	5.4	93.2	PD064330	-
PD064332	CHEMBL383484	CC(=O)c1cc(S(C)(=O)=O)cc2c3c(n(Cc4ccc(Cl)cc4)c12)[C@@H](CC(=O)O)CC3	YYVOCPXSWUYWAL-OAHLLOKOSA-N	PTGDR	Homo sapiens												1							1		1						3.0	459.09	5.0	1.0	6.0	4.0	3.0	4.45	93.44	PD064333	-
PD064334	CHEMBL380492	CC(C)(C(=O)O)N1CCC(C(=O)NC2CCN(Cc3cccc(Oc4ccccc4Cl)c3)CC2)(c2ccccc2)CC1	TXEFMFGXKKPZEW-UHFFFAOYSA-N	CCR8	Homo sapiens												1							1		1						1.0	589.27	5.0	2.0	9.0	5.0	3.0	6.11	82.11	PD064334	-
PD064336	CHEMBL377855	O=C(O)CC1CNC(c2ccc(OCc3cc(-c4ccccc4)c(C(F)(F)F)s3)cc2)C1	UNTMCOZQSGVJBE-UHFFFAOYSA-N	S1PR1	Homo sapiens												1							1		1						4.0	461.13	4.0	2.0	7.0	4.0	3.0	6.14	58.56	PD064336	-
PD064338	CHEMBL375671	Cc1cc(Nc2ncnc3cnc(N4CCOCC4)cc23)ccc1Oc1ccc(C(=O)NCC(C)(C)C)cc1	KKWBRQPIXLDPAR-UHFFFAOYSA-N	ERBB2	Homo sapiens												1							1								1.0	526.27	8.0	2.0	7.0	5.0	4.0	5.48	101.5	PD064338	-
PD064340	CHEMBL367315	O=c1cc(N2CCOCC2)oc2ccccc12	QNFWERYZJLBANZ-UHFFFAOYSA-N	ECE1	Homo sapiens												1							1		1						3.0	231.09	4.0	0.0	1.0	3.0	2.0	1.63	42.68	PD064340	-
PD064342	CHEMBL365307	Nc1nc2[nH]c(CCCCc3ccc(C(=O)N[C@@H](CCC(=O)O)C(=O)O)cc3)cc2c(=O)[nH]1	CEPQCJFDTGQKDN-INIZCTEOSA-N	GART	Homo sapiens									1			1							1								5.0	455.18	6.0	6.0	11.0	3.0	3.0	1.45	191.26	PD064343	-
PD064344	CHEMBL3628113	Cc1ccoc1C(=O)Nc1ccc(N2C(=O)c3cccc(F)c3C2=O)c(Cl)c1	HHRZBUWNLICHOO-UHFFFAOYSA-N	GRM1	Homo sapiens				1								1				1			1		1						4.0	398.05	4.0	1.0	3.0	4.0	3.0	4.43	79.62	PD064344	-
PD064346	CHEMBL3617550	CN1CCC(C(=O)c2cccc(NC(=O)c3ccc(F)cc3)c2F)CC1	SGSLWTIFTLMNRI-UHFFFAOYSA-N	HTR1F	Homo sapiens												1							1								1.0	358.15	3.0	1.0	4.0	3.0	2.0	3.74	49.41	PD064346	-
PD064348	CHEMBL3616501	C/C(=N\c1ccc2c(c1)[C@@H](NC(=O)c1ccc(-c3ccccc3)cc1)[C@H](O)C2)N(C)Cc1ccc(F)cc1	KOQVBYSCBCRVQJ-SVUXJTORSA-N	CHRM1	Homo sapiens												1							1		1						3.0	507.23	3.0	2.0	6.0	5.0	4.0	6.06	64.93	PD024456	-
PD064349	CHEMBL3613921	O=c1[nH]c(=O)n(Cc2cccc3ccccc23)nc1O	DNIURSGRFSKVEF-UHFFFAOYSA-N	DAO	Homo sapiens												1							1								1.0	269.08	5.0	2.0	2.0	3.0	3.0	0.84	87.98	PD064349	-
PD064351	PF-06471553	COc1cccc(CC(=O)N2Cc3ccc(S(=O)(=O)Nc4cnn(C5CCC5)n4)cc3C2)c1	GRXCLNMCJWKTAT-UHFFFAOYSA-N	MGAT3	Homo sapiens				1								1				1			1		1						4.0	467.16	7.0	1.0	7.0	5.0	3.0	2.9	106.42	PD064351	-
PD064353	JZP 430	CN(C(=O)Oc1nsnc1N1CCOCC1)C1CCCCCCC1	WKSHMJCYWFOADB-UHFFFAOYSA-N	ABHD6	Homo sapiens												1				1			1								1.0	354.17	7.0	0.0	3.0	3.0	1.0	2.92	67.79	PD064353	-
PD064355	CHEMBL3613162	Nc1cccc(Cn2nc(Oc3ccccc3)oc2=O)c1	XBXJIQLJWDYRGA-UHFFFAOYSA-N	ABHD6	Homo sapiens												1							1		1						2.0	283.1	6.0	1.0	4.0	3.0	3.0	2.26	83.28	PD064355	-
PD064357	CHEMBL3613119	COc1ccc(-c2c(C#N)c(N)nc(SCc3csc(-c4ccc(Cl)cc4)n3)c2C#N)cc1	TVXHJIDNWXNUMN-UHFFFAOYSA-N	ADORA1	Homo sapiens												1							1								1.0	489.05	8.0	1.0	6.0	4.0	4.0	6.15	108.61	PD064357	-
PD064359	CHEMBL3612810	COc1cc([C@@H](O)CN2CCN(C[C@H](O)c3ccc4c(c3C)COC4=O)CC2)ncc1C#N	QZUKGDYPSXQBSQ-VXKWHMMOSA-N	KCNJ1	Homo sapiens												1				1			1								2.0	452.21	9.0	2.0	7.0	4.0	2.0	1.33	119.15	PD064360	-
PD064362	CHEMBL3609742	[H]C([H])(F)Oc1cc(NC(=O)c2ccccn2)ccc1Cl	SRGKMBLOTCYGBS-UHFFFAOYSA-N	GRM4	Homo sapiens												1							1		1						1.0	280.04	3.0	1.0	4.0	2.0	2.0	3.29	51.22	PD064362	-
PD064363	CHEMBL3609300	CC[C@@H]1C(=O)N(CC)c2cnc(Nc3ccc(C(=O)NC4CCN(C)CC4)cc3OC)nc2N1C1CCCC1	KHVSTZSCKUIMFH-HSZRJFAPSA-N	PLK1	Homo sapiens									1			1							1		1						3.0	535.33	8.0	2.0	8.0	5.0	2.0	3.95	102.93	PD064364	-
PD064365	CHEMBL3609092	CC[C@H](C)[C@@H]1NC(=O)[C@@H](NC(=O)[C@H](CO)NC(=O)[C@@H](N)CCCNC(=N)N)CSSC[C@@H](C(=O)N[C@@H](C)C(=O)O)NC(=O)[C@H]([C@@H](C)O)NC(=O)CNC(=O)[C@@H]2CSSC[C@@H]3NC(=O)[C@H](CCCCN)NC(=O)[C@H](Cc4ccccc4)NC(=O)[C@H](C)NC(=O)[C@H]([C@@H](C)O)NC(=O)[C@H](CSSC[C@H](NC(=O)[C@H](Cc4ccccc4)NC(=O)[C@H](CO)NC(=O)[C@H](CC(C)C)NC(=O)[C@H](CCCNC(=N)N)NC(=O)[C@H](Cc4ccc(O)cc4)NC(=O)[C@H](CCCCN)NC(=O)[C@H](CCCCN)NC…	SYGMFDWVXIFOBU-CVHNOKNFSA-N	KCNA3	Homo sapiens												1							1								1.0	4120.0	64.0	65.0	71.0	8.0	4.0	-19.94	1724.8	PD064366	-
PD064367	CHEMBL3604174	O=C(Nc1ccc(Cl)cc1Cl)c1cn[nH]n1	GAGGCNZJYKWGJL-UHFFFAOYSA-N	ALOX15	Homo sapiens												1				1			1								5.0	255.99	3.0	2.0	2.0	2.0	2.0	2.36	70.67	PD064367	-
PD064369	CHEMBL360304	CN(C)CCCn1nc(C2=C(c3cn(-c4cccc5ccccc45)c4ccccc34)C(=O)NC2=O)c2ccccc21	IGFXNXIRVKBKLL-UHFFFAOYSA-N	PRKCB	Homo sapiens												1							1		1						6.0	539.23	6.0	1.0	7.0	7.0	6.0	5.65	72.16	PD064369	-
PD064371	CHEMBL3601432	CCCC[C@@H](NC(C)=O)C(=O)N[C@H]1CC(=O)NCCCC[C@@H](C(N)=O)N(C)C(=O)[C@H](Cc2c[nH]c3ccccc23)N(C)C(=O)[C@H](CCCNC(=N)N)N(C)C(=O)[C@@H](Cc2ccc3ccccc3c2)N(C)C(=O)[C@H](Cc2cnc[nH]2)N(C)C1=O	JQBPGTIPRHEONU-VVPYAFNRSA-N	MC1R	Homo sapiens												1							1		1						4.0	1143.63	11.0	9.0	17.0	6.0	5.0	1.83	338.31	PD064372	-
PD064373	CHEMBL3601426	CCCC[C@@H](NC(C)=O)C(=O)N[C@H]1CC(=O)NCCCC[C@@H](C(N)=O)NC(=O)[C@H](Cc2c[nH]c3ccccc23)NC(=O)[C@H](CCCNC(=N)N)N(C)C(=O)[C@@H](Cc2ccc3ccccc3c2)N(C)C(=O)[C@H](Cc2cnc[nH]2)N(C)C1=O	TVKPENPJQKTJFK-SHVRLUCGSA-N	MC4R	Homo sapiens												1							1		1						4.0	1115.6	11.0	11.0	17.0	6.0	5.0	1.14	355.89	PD064374	-
PD064375	CHEMBL3601192	Cc1cc(Nc2ncc(-c3ccc4ccccc4n3)c(N[C@@H]3C[C@H](CO)[C@@H](O)[C@H]3O)n2)cc(C)n1	LKWUVRWXZPRGNM-BMZZKGLRSA-N	IRAK4	Homo sapiens												1							1		1						1.0	472.22	9.0	5.0	6.0	5.0	4.0	2.96	136.31	PD064376	-
PD064379	CHEMBL3590405	Cc1cncc(-c2ccc(N[C@@H]3CCNC[C@H]3OCC3CCS(=O)(=O)CC3)c3[nH]c(=O)c(C)cc23)c1	KXXIBIBXJMYWNL-ILBGXUMGSA-N	ATAD2	Homo sapiens												1							1		1						13.0	510.23	7.0	3.0	6.0	5.0	3.0	3.19	113.18	PD064380	-
PD064381	CHEMBL3590121	C=CC(=O)Nc1ccccc1Nc1nc(NC2CCOCC2)ncc1C(F)(F)F	COSHZQYMYFJMAZ-UHFFFAOYSA-N	MAPK1	Homo sapiens												1							1		1		1				2.0	407.16	6.0	3.0	6.0	3.0	2.0	3.95	88.17	PD064381	-
PD064383	CHEMBL3590110	C=CS(=O)(=O)Nc1ccc2[nH]nc(-c3ccncc3)c2c1	MIISUCGGVANLKC-UHFFFAOYSA-N	MAPK1	Homo sapiens												1							1		1						2.0	300.07	4.0	2.0	4.0	3.0	3.0	2.51	87.74	PD064383	-
PD064385	CHEMBL3589662	O=C(O)c1nc2ccccc2c2[nH]c3c(I)cccc3c12	SDRAETFVRBBLOB-UHFFFAOYSA-N	DYRK1A	Homo sapiens												1							1		1						5.0	387.97	2.0	2.0	1.0	4.0	4.0	4.17	65.98	PD064385	-
PD064387	CHEMBL3586360	O=c1cc(CN2CCOc3c(Cl)cc(-n4ccc5cc(F)ccc54)cc3C2)cc[nH]1	JCMBXRJQNVPHIQ-UHFFFAOYSA-N	PTGER2	Homo sapiens												1							1		1						2.0	423.11	4.0	1.0	3.0	5.0	4.0	4.51	50.26	PD064387	-
PD064389	CHEMBL3586032	CC(=O)N1[C@@H]2C=C(c3cnc(NCc4ccc5c(c4)OCC5)c(C(=O)NC[C@H]4COc5ccccc5O4)c3)C[C@H]1CC2	UZJCBPUZLIMFRR-VJGNERBWSA-N	GHSR	Homo sapiens												1				1			1								1.0	566.25	7.0	2.0	7.0	7.0	3.0	4.37	102.02	PD064390	-
PD064391	CHEMBL3582155	COc1cc(OC)c2c(c1)O[C@H](c1cc(OC)c(OC)c(OC)c1)[C@H](OC(=O)c1ccc(F)c(NC(=O)c3ccc(OC)c(OC)c3)c1)C2	XPNBVAOZAHYCST-CZNDPXEESA-N	ABCB1	Homo sapiens												1							1								3.0	677.23	11.0	1.0	12.0	5.0	4.0	6.04	129.24	PD064392	-
PD064393	CHEMBL3582149	COc1cc(OC)c2c(c1)O[C@H](c1cc(OC)c(OC)c(OC)c1)[C@H](OC(=O)/C=C/c1cc(OC)c(OC)c(OC)c1)C2	NECCTVFNAYKBCX-JPYFANRKSA-N	ABCB1	Homo sapiens												1							1								3.0	596.23	11.0	0.0	12.0	4.0	3.0	5.06	109.37	PD064394	-
PD064395	CHEMBL3581716	CC(=O)Nc1cc(S(=O)(=O)Nc2ccc(F)cc2F)cc2c1N(CCc1ccccc1)CC2	XVSKYVJHKGLQMZ-UHFFFAOYSA-N	MGAT2	Homo sapiens												1							1		1						2.0	471.14	4.0	2.0	7.0	4.0	3.0	4.33	78.51	PD064395	-
PD064397	CHEMBL3581264	N=C(N)NCCC[C@@H]1NC(=O)[C@H](CCCNC(=N)N)NC(=O)[C@@H](Cc2ccc(O)cc2)NC(=O)[C@@H]2CCCN2C(=O)[C@H](Cc2ccc3ccccc3c2)NC1=O	AVNDVFCGYOONJV-LUKCZKMGSA-N	ACKR3	Homo sapiens												1							1								1.0	769.4	8.0	11.0	12.0	5.0	3.0	-0.2	280.74	PD064398	-
PD064399	CHEMBL3580926	CCNc1nnc(Cc2c[nH]c3ccc(OC)cc23)s1	DIDVMNKRIDUMKO-UHFFFAOYSA-N	MTNR1B	Homo sapiens												1							1								1.0	288.1	5.0	2.0	5.0	3.0	3.0	3.05	62.83	PD064399	-
PD064401	CHEMBL3234871	N#Cc1ccc(CCNC(=O)[C@@H]2CCN2c2cc(-c3ccc([C@H]4CC[C@H](C(=O)O)CC4)cc3)nc(C(F)(F)F)n2)cc1	DDAWTSCZLAACFR-GVUKDKGQSA-N	GPBAR1	Homo sapiens				1								1				1			1		1						1.0	577.23	6.0	2.0	8.0	5.0	3.0	5.33	119.21	PD064402	-
PD064403	apelin-17	CSCC[C@H](NC(=O)[C@@H]1CCCN1C(=O)CNC(=O)[C@H](CCCCN)NC(=O)[C@H](Cc1cnc[nH]1)NC(=O)[C@H](CO)NC(=O)[C@H](CC(C)C)NC(=O)[C@H](CCCNC(=N)N)NC(=O)[C@@H]1CCCN1C(=O)[C@H](CCCNC(=N)N)NC(=O)[C@H](CCC(N)=O)NC(=O)[C@H](CCCNC(=N)N)NC(=O)[C@H](CCCNC(=N)N)NC(=O)[C@H](Cc1ccccc1)NC(=O)[C@@H](N)CCCCN)C(=O)N1CCC[C@H]1C(=O)N[C@@H](Cc1ccccc1)C(=O)O	SVWSKJCJNAIKNH-MJZUAXFLSA-N	APLN	Homo sapiens												1							1		1						2.0	2137.2	28.0	32.0	69.0	6.0	3.0	-7.88	894.19	PD064404	-
PD064407	CHEMBL3220046	O=c1[nH]/c(=N\OCc2cccc(Br)c2)ccn1[C@@H]1O[C@H](COP(=O)(O)OP(=O)(O)O)[C@@H](O)[C@H]1O	FGMXILSWRVITJV-NMFUWQPSSA-N	P2RY6	Homo sapiens												1							1		1						2.0	586.97	11.0	6.0	9.0	3.0	2.0	-0.18	222.36	PD064408	-
PD064410	CHEMBL3216999	CCOc1ccc(Cc2nc3cc(NC(=N)c4cccs4)ccc3n2CCN(CC)CC)cc1	VHCJGRIHHCFASW-UHFFFAOYSA-N	OPRM1	Homo sapiens												1							1		1						4.0	475.24	6.0	2.0	11.0	4.0	4.0	5.87	66.17	PD064410	-
PD064412	CHEMBL3215768	O=C(NCCCCCCCCNc1c2c(nc3cc(Cl)ccc13)CCCC2)c1ccc2nc(-c3ccc(Cl)cc3)c3c(c2c1)OCCC3	RJZPCUVMLZBWGD-UHFFFAOYSA-N	ACHE	Homo sapiens												1							1		1						2.0	680.27	5.0	2.0	12.0	7.0	5.0	10.14	76.14	PD064412	-
PD064413	CHEMBL3144285	C[C@@H](O)[C@H](NC(=O)[C@@H]1CSSC[C@H](NC(=O)[C@H](Cc2ccccc2)NC[C@]2(O)OC[C@H](O)[C@@H](O[C@@H]3O[C@@H](CO)[C@@H](O)[C@H](O)[C@@H]3O)[C@@H]2O)C(=O)N[C@@H](Cc2ccc(O)c(I)c2)C(=O)N[C@H](Cc2c[nH]c3ccccc23)C(=O)N[C@@H](CCCCN)C(=O)N[C@@H]([C@@H](C)O)C(=O)N1)C(=O)O	RXSDHHRIGJKEOJ-GZJBUCRJSA-N	SSTR2	Homo sapiens												1							1		1						4.0	1498.42	25.0	21.0	23.0	7.0	4.0	-5.15	524.83	PD064414	-
PD064415	CHEMBL3134375	COc1ncccc1CNC1CC1c1ccccc1	NPKNICGBPBZUFV-UHFFFAOYSA-N	KDM1A	Homo sapiens												1							1		1						1.0	254.14	3.0	1.0	5.0	3.0	2.0	2.74	34.15	PD064415	-
PD064417	CHEMBL3127163	O=C(O)c1csc(-n2nc(-c3ccccc3)c3ccc(C(F)(F)F)cc32)n1	JELFUQAHMVGHOB-UHFFFAOYSA-N	PTGER1	Homo sapiens												1							1		1						4.0	389.04	5.0	1.0	3.0	4.0	4.0	4.87	68.01	PD064417	-
PD064419	CHEMBL3115194	COC(=O)C(CCC(=O)N(C)CCCc1nc2ccccc2[nH]1)(c1ccc(Br)cc1)C(C)C	GLOKEGVIMFVYSX-UHFFFAOYSA-N	CACNA1G	Homo sapiens												1							1		1						3.0	513.16	4.0	1.0	10.0	3.0	3.0	5.26	75.29	PD064419	-
PD064423	CHEMBL3110303	O=c1cc(NC2CCCCC2)c(-c2nc[nH]n2)nn1-c1ccccc1	CRZJAUQQVQGZNE-UHFFFAOYSA-N	AOC3	Homo sapiens												1							1								1.0	336.17	6.0	2.0	4.0	4.0	3.0	2.76	88.49	PD064423	-
PD064425	CHEMBL3110081	CCOc1ccc(N2CCN(c3noc(CC)n3)[C@@H](C)C2)c(C)c1	IDCAZOYSDXUCSQ-AWEZNQCLSA-N	ACACB	Homo sapiens												1							1							1	2.0	330.21	6.0	0.0	5.0	3.0	2.0	3.05	54.63	PD064426	-
PD064427	CHEMBL3109933	CN(C)C(=O)c1ccc(Nc2cc3c(cn2)cc(-c2cnn(C)c2)n3C(=O)OC(C)(C)C)c(Cl)c1	KYBALIQJYSWGLI-UHFFFAOYSA-N	TTK	Homo sapiens												1							1		1						3.0	494.18	8.0	1.0	4.0	4.0	4.0	5.32	94.28	PD064427	-
PD064429	CHEMBL3092485	COc1ccc(-c2nc(Nc3cccc([N+](=O)[O-])c3)c3ccccc3n2)cc1OC	GREUUZTVKZZOGK-UHFFFAOYSA-N	ABCG2	Homo sapiens												1							1		1						2.0	402.13	7.0	1.0	6.0	4.0	4.0	4.97	99.41	PD064429	-
PD064431	TIQ-15	NCCCCN(C[C@H]1Cc2ccccc2CN1)[C@H]1CCCc2cccnc21	MYCKNKHATQGHEV-YADHBBJMSA-N	CXCR4	Homo sapiens												1							1		1						5.0	364.26	4.0	2.0	7.0	4.0	2.0	3.21	54.18	PD064432	-
PD064433	CHEMBL3091630	Cc1nc(Cc2cccc(Oc3ccccc3)c2)c(/C=C/C(=O)O)c(C=O)c1O	NRQMQLIOIVRYHC-ZHACJKMWSA-N	P2RX3	Homo sapiens												1							1								1.0	389.13	5.0	2.0	7.0	3.0	3.0	4.39	96.72	PD064434	-
PD064436	DPDPE	CC1(C)SSC(C)(C)[C@@H](NC(=O)[C@@H](N)Cc2ccc(O)cc2)C(=O)NCC(=O)N[C@H](Cc2ccccc2)C(=O)N[C@H]1C(=O)O	MCMMCRYPQBNCPH-DVKRWUGUSA-N	OPRD1	Homo sapiens												1							1		1						5.0	645.23	9.0	7.0	7.0	3.0	2.0	1.11	199.95	PD066768	-
PD064437	CHEMBL275067	CCCC(=O)C1(c2ccccc2)CCN(C(=O)[C@@H](Cc2ccc(OC)cc2)NC(=O)[C@@H](Cc2c[nH]cn2)NC(C)=O)CC1	LGKJAWXHTMWMPF-FQLXRVMXSA-N	MC1R	Homo sapiens												1							1		1						4.0	587.31	6.0	3.0	13.0	4.0	3.0	3.12	133.49	PD064438	-
PD064439	CHEMBL264190	CC(=O)N[C@@H](Cc1cnc[nH]1)C(=O)N[C@H](Cc1ccccc1)C(=O)N[C@@H](CCCNC(=N)N)C(=O)N[C@@H](Cc1c[nH]c2ccccc12)C(N)=O	DFCJPPDAOZROBS-FKWFRFQNSA-N	MC4R	Homo sapiens												1							1								4.0	685.34	7.0	10.0	18.0	4.0	4.0	-0.37	265.86	PD064440	-
PD064441	CHEMBL260994	O=C1Nc2ccccc2C1CCCCN1CCN(c2ccc(Cl)cc2)CC1	JAOXKCOCADFHNG-UHFFFAOYSA-N	HTR7	Homo sapiens												1							1		1						9.0	383.18	3.0	1.0	6.0	4.0	2.0	4.37	35.58	PD064441	-
PD064443	CHEMBL25889	C#CCN(Cc1ccc2nc(C)nc(O)c2c1)c1ccc(C(=O)NC(CCC(=O)O)C(=O)O)cc1	PMTUUSDTAKQWQJ-UHFFFAOYSA-N	TYMS	Homo sapiens									1			1							1		1						4.0	476.17	7.0	4.0	10.0	3.0	3.0	2.33	152.95	PD064443	-
PD064445	CHEMBL257940	CC(=O)N1CCC(N(C)C(=O)N[C@H]2CC[C@H](c3cc(F)cc(F)c3)CC2)CC1	WZHXVKWOVBWNIB-RHDGDCLCSA-N	NPY5R	Homo sapiens												1							1		1						1.0	393.22	2.0	1.0	3.0	3.0	1.0	3.64	52.65	PD064446	-
PD064447	CHEMBL253665	Cc1cc(C#N)ccc1C1CCN(S(=O)(=O)CC2(C(=O)NO)CCN(C(=O)O[C@H]3CCOC3)CC2)CC1	IVYQYYDKKZBNTO-NRFANRHFSA-N	ADAM10	Homo sapiens												1							1		1						2.0	534.21	8.0	2.0	6.0	4.0	1.0	1.89	149.27	PD064448	-
PD064449	CHEMBL250689	CC(=O)c1cccc(NC(=O)N[C@@H]2CCCC[C@H]2CN2CCC[C@@H](Cc3ccc(F)cc3)C2)c1	ASRDPULQBHFPGU-WFIHMLKPSA-N	CCR3	Homo sapiens												1							1		1						8.0	465.28	3.0	2.0	7.0	4.0	2.0	5.66	61.44	PD064450	-
PD064451	CHEMBL249915	CS(=O)(=O)C[C@H](N[C@@H](c1ccc(F)cc1)C(F)(F)F)C(=O)NC1(C#N)CC1	HBOZUMOKFHNMQI-STQMWFEESA-N	CTSS	Homo sapiens												1							1		1						4.0	407.09	5.0	2.0	7.0	2.0	1.0	1.6	99.06	PD064452	-
PD064453	CHEMBL246003	COc1c(O)ccc2c1[C@]13CCN(C)[C@H](C2)[C@]1(O)Cc1c([nH]c2ccccc12)C3	NGVIJPSZRGAUGY-AGILITTLSA-N	OPRD1	Homo sapiens												1							1		1						3.0	390.19	4.0	3.0	1.0	6.0	3.0	2.91	68.72	PD064454	-
PD064455	CHEMBL244946	Cc1ccc2c(-c3nnc(SCCCN4CCc5ccc(-c6cc(C)nn6C)cc5CC4)n3C)cccc2n1	WIHMMKGUBDZGEG-UHFFFAOYSA-N	DRD3	Homo sapiens												1							1		1						10.0	537.27	8.0	0.0	7.0	6.0	5.0	5.63	64.66	PD064455	-
PD064457	CHEMBL2443061	O=C(Nc1ccc(OC(F)(F)F)cc1)N1CCC2(CC1)C[C@@H](O)c1cccc(Cl)c1O2	UQEATFAWAKBMKD-QGZVFWFLSA-N	TRPM8	Homo sapiens												1							1								1.0	456.11	4.0	2.0	2.0	4.0	2.0	5.12	71.03	PD064458	-
PD064459	CHEMBL2441437	O=C1OCc2cc(CCN3CCN(C(=O)Cc4ccc(-n5cnnn5)cc4)CC3)ccc21	LKLRNYYBQWYHND-UHFFFAOYSA-N	KCNJ1	Homo sapiens												1							1		1						4.0	432.19	8.0	0.0	6.0	5.0	3.0	1.26	93.45	PD064459	-
PD064461	CHEMBL2440193	CC[C@H](C)[C@H](NC(=O)[C@H](Cc1ccc(O)cc1)NC(=O)[C@H](Cc1cnc[nH]1)NC(=O)[C@H](CCCNC(=N)N)NC(C)=O)C(=O)N[C@@H](CC(N)=O)C(=O)N[C@@H](CC(C)C)C(=O)N[C@H](C(=O)N[C@@H]1C[C@H](C(=O)N[C@@H](CCCNC(=N)N)C(=O)N[C@@H]2C[C@H](C(=O)N[C@@H](CCCNC(=N)N)C(=O)N[C@@H](Cc3ccc(O)cc3)C(N)=O)C2(C)C)C1(C)C)[C@@H](C)CC	MTFGLKCUHOHWPI-ZEOIPKQCSA-N	NPY4R	Homo sapiens												1							1								1.0	1693.99	20.0	26.0	50.0	5.0	3.0	-2.93	690.22	PD064462	-
PD064463	CHEMBL2440185	CC[C@H](C)[C@H](NC(=O)[C@H](Cc1ccc(O)cc1)NC(=O)[C@H](Cc1cnc[nH]1)NC(=O)[C@H](CCCNC(=N)N)NC(C)=O)C(=O)N[C@@H](CC(N)=O)C(=O)N[C@@H](CC(C)C)C(=O)N[C@H](C(=O)N[C@H](C(=O)N[C@@H](CCCNC(=N)N)C(=O)N[C@@H](CCC(N)=O)C(=O)N[C@@H](CCCNC(=N)N)C(=O)N[C@@H](Cc1ccc(O)cc1)C(N)=O)[C@@H](C)O)[C@@H](C)CC	WIBSCJFYXUIBMU-DEMLLOIYSA-N	NPY2R	Homo sapiens												1							1								2.0	1672.93	22.0	28.0	54.0	3.0	3.0	-6.38	753.54	PD064464	-
PD064465	CHEMBL2431028	NC(=O)NCCC[C@@H](NS(=O)(=O)c1ccc(OCc2cc(Br)cc(Br)c2)cc1)C(=O)NO	QTXVPJOTKLUYMQ-QGZVFWFLSA-N	ADAM17	Homo sapiens												1							1		1						5.0	591.96	6.0	5.0	11.0	2.0	2.0	2.39	159.85	PD064466	-
PD064467	CHEMBL2408616	Nc1ncc(-c2cnn([C@H]3CC[C@H](O)CC3)c2)c2c(C(F)F)c(-c3cccc4nnsc34)oc12	CQMWAJCVQYHQCJ-JOCQHMNTSA-N	MAP3K7	Homo sapiens												1							1		1						3.0	482.13	9.0	2.0	4.0	6.0	5.0	5.36	115.88	PD064468	-
PD064469	CHEMBL2407198	OC[C@H]1C[C@@H](O)CCN1CCc1ccc(Nc2nc(C3CCCCC3)cs2)cc1	LRTJNSSXHCYTOU-RTWAWAEBSA-N	SPHK1	Homo sapiens												1							1		1						2.0	415.23	6.0	3.0	7.0	4.0	2.0	4.29	68.62	PD064470	-
PD064471	CHEMBL2393448	CCOC(=O)c1c(-c2ccc(N(C)C)cc2)csc1N	YAZWNGDLKIJVLM-UHFFFAOYSA-N	PRKCZ	Homo sapiens												1							1								2.0	290.11	5.0	1.0	4.0	2.0	2.0	3.24	55.56	PD064471	-
PD064473	CHEMBL2393423	COc1ccc(-c2csc(N)c2C(=O)OC(C)C)cc1OC	WEHPOCNINSGWET-UHFFFAOYSA-N	PRKCZ	Homo sapiens												1							1								2.0	321.1	6.0	1.0	5.0	2.0	2.0	3.58	70.78	PD064473	-
PD064475	CHEMBL2392692	CNc1nc(C)nc(N2CCC(C(=O)NCc3ccc(Br)cc3OC(F)(F)F)CC2)n1	PVTFEAGMCGMRRS-UHFFFAOYSA-N	EPHX2	Homo sapiens												1							1		1						1.0	502.09	7.0	2.0	6.0	3.0	2.0	3.42	92.27	PD064475	-
PD064477	CHEMBL2392174	COc1ccc(C(=O)Nc2cc(Br)cc3c(=O)cc(C(=O)O)oc23)cc1	TZKQFDIFVZAYER-UHFFFAOYSA-N	GPR35	Homo sapiens				1								1				1			1		1						3.0	416.98	5.0	2.0	4.0	3.0	3.0	3.51	105.84	PD064477	-
PD064480	CHEMBL2392121	CC(=O)Nc1nc(CCc2ccc(Cc3c[nH]c(N)n3)cc2)cs1	VXAPNCLMTSOGLM-UHFFFAOYSA-N	AOC3	Homo sapiens												1							1		1						2.0	341.13	5.0	3.0	6.0	3.0	3.0	2.78	96.69	PD064480	-
PD064481	E1R	C[C@H]1[C@@H](c2ccccc2)CC(=O)N1CC(N)=O	ZTGRWYMPQCQTHD-ONGXEEELSA-N	SIGMAR1	Homo sapiens												1							1								1.0	232.12	2.0	1.0	3.0	2.0	1.0	0.88	63.4	PD064482	-
PD064483	TC JL 37	N#Cc1cc(F)c(C(=O)Nc2ccnc(NC(=O)[C@H]3C[C@H]3F)c2)c(Cl)c1	NKALKXMQBFLGQI-CMPLNLGQSA-N	TYK2	Homo sapiens												1							1								2.0	376.05	4.0	2.0	4.0	3.0	2.0	3.29	94.88	PD064484	-
PD064485	CHEMBL2385460	COc1ccc(F)c(-c2ccc(COc3ccc4c(c3)[C@]3(CC4)C[C@H]3C(=O)O)cc2[C@@H]2CCCC2(C)C)c1	XPLWBHWPOUEOSJ-GSZYCOFVSA-N	FFAR1	Homo sapiens												1							1					1			1.0	514.25	3.0	1.0	7.0	6.0	3.0	7.66	55.76	PD064486	-
PD064487	CHEMBL2381188	Cc1nc(-c2cnn(C)c2-c2ccc(C(F)(F)F)cc2)c2c(N3CC(F)C3)ncnn12	NXNPDXUSIAPGFQ-UHFFFAOYSA-N	PDE2A	Homo sapiens												1							1		1						4.0	431.15	7.0	0.0	3.0	5.0	4.0	3.68	64.14	PD064487	-
PD064489	CHEMBL2381116	COc1ccc2c(c1)C(=O)N(c1nc(C(=O)Nc3cnccc3N3CCNCC3)cs1)C2	KLJVDMAOKMSBQX-UHFFFAOYSA-N	CHEK1	Homo sapiens												1							1		1						12.0	450.15	8.0	2.0	5.0	5.0	3.0	2.37	99.69	PD064489	-
PD064492	CHEMBL2377385	CC[N+](C)(CC)CCOC(=O)C(c1ccccc1)c1ccccc1	KKSJQQXZULJWIM-UHFFFAOYSA-N	CHRM1	Homo sapiens												1							1		1						3.0	326.21	2.0	0.0	8.0	2.0	2.0	3.85	26.3	PD064492	-
PD064493	CHEMBL2371968	CCCC[C@H](NC(C)=O)C(=O)N[C@H]1CC(=O)NCCCC[C@@H](C(N)=O)NC(=O)[C@H](Cc2c[nH]c3ccccc23)NC(=O)[C@@H]2CCCCN2C(=O)[C@H](Cc2ccc(-c3ccccc3)cc2)NC(=O)[C@@H]2CC3CCCCC3N2C1=O	BMAPOAMSOKHHLD-ZNLSIPTCSA-N	MC5R	Homo sapiens												1							1								1.0	1068.58	9.0	8.0	12.0	8.0	4.0	3.97	274.1	PD064494	-
PD064495	CHEMBL236788	CCOc1cc(CN2CCC(Nc3nc4cc(S(N)(=O)=O)ccc4o3)CC2)cc(OCC)c1N	OFGZKSUTEKHHAS-UHFFFAOYSA-N	SSTR5	Homo sapiens				1								1				1			1		1						3.0	489.2	9.0	3.0	9.0	4.0	3.0	2.93	145.94	PD064495	-
PD064497	CHEMBL2348154	Nc1nccc(-n2cc(-c3cccnc3Cl)c3cnccc32)n1	CCCPUPRKQZVNNE-UHFFFAOYSA-N	CDC7	Homo sapiens												1							1		1						2.0	322.07	6.0	1.0	2.0	4.0	4.0	3.11	82.51	PD064497	-
PD064501	CHEMBL2334539	CC(=O)OC[C@]1(C)[C@@H](OC(C)=O)CC[C@]2(C)[C@H]3[C@@H](O)c4c(cc(-c5cccnc5)oc4=O)O[C@]3(C)[C@@H](OC(=O)c3ccc(C#N)cc3)C[C@H]21	HBSJDWOXHMSOQS-ZRPSWOMSSA-N	SOAT2	Homo sapiens												1							1		1						2.0	670.25	12.0	1.0	6.0	6.0	3.0	4.92	175.25	PD064502	-
PD064503	CHEMBL2333767	Cc1ccc(NC(=O)Nc2cccnc2Sc2ccccc2C(C)(C)C)cc1	VZYJPMFMCIMJOD-UHFFFAOYSA-N	P2RY1	Homo sapiens												1							1		1						3.0	391.17	3.0	2.0	4.0	3.0	3.0	6.48	54.02	PD064503	-
PD064505	CHEMBL2326261	CC(C)C[C@H](NC(=O)[C@H](Cc1ccc(CN)cc1)NC(=O)[C@H](Cc1ccccc1)N=[N+]=[N-])C(=O)N[C@H](/C=C/S(C)(=O)=O)Cc1ccc(CN)cc1	VSAACOMACMBQKJ-YWIYQGBMSA-N	PSMB2	Homo sapiens												1							1							1	3.0	716.35	8.0	5.0	19.0	3.0	3.0	3.37	222.24	PD064506	-
PD064507	CHEMBL2326199	CCC(=O)NCCCc1cc(OC)ccc1OCc1cccc(OC)c1	FPWCECQCQIIXNN-UHFFFAOYSA-N	MTNR1B	Homo sapiens												1							1		1						2.0	357.19	4.0	1.0	10.0	2.0	2.0	3.74	56.79	PD064507	-
PD064509	CHEMBL2325703	CC(C)(c1cc(N2CCOCC2)nc(-c2cccc3[nH]ccc23)n1)S(C)(=O)=O	TYPBASYBSGLAOL-UHFFFAOYSA-N	ATR	Homo sapiens												1							1								3.0	400.16	6.0	1.0	4.0	4.0	3.0	2.74	88.18	PD064509	-
PD064511	CHEMBL2324690	COc1cccc(N(C)C(=O)c2ccc(-c3cccc(C)c3)s2)c1	BABRITZRSIMSNK-UHFFFAOYSA-N	HSD17B2	Homo sapiens												1							1		1						2.0	337.11	3.0	0.0	4.0	3.0	3.0	5.01	29.54	PD064511	-
PD064513	CHEMBL2323695	Cc1cc(CCCC(=O)NC(C)(C)C(=O)N2CCNCC2)ccc1Cc1c(O[C@@H]2O[C@H](CO)[C@@H](O)[C@H](O)[C@H]2O)n[nH]c1C(C)C	HZIRWWOSGYBPSU-RHBSMATHSA-N	SLC5A1	Homo sapiens												1							1								2.0	631.36	10.0	7.0	12.0	4.0	2.0	0.26	189.5	PD064514	-
PD064515	CHEMBL2323507	COc1ccc2c(c1)c(C)c(CCC(=O)O)n2C(=O)c1ccc(Cl)cc1	NDOLIIHMVOZCMD-UHFFFAOYSA-N	AR	Homo sapiens												1							1		1						6.0	371.09	4.0	1.0	5.0	3.0	3.0	4.32	68.53	PD064515	-
PD064517	CHEMBL2323490	COc1ccc2c(c1)c(CC(=O)NS(=O)(=O)C(F)(F)F)cn2C(=O)c1ccc(Cl)cc1	LOPOBSJDASSEKN-UHFFFAOYSA-N	AR	Homo sapiens												1							1		1						4.0	474.03	6.0	1.0	5.0	3.0	3.0	3.5	94.47	PD064517	-
PD064520	CHEMBL222752	O=C1C(=O)N(Cc2ccc(Cc3ccc(CN4C(=O)C(=O)c5ccccc54)cc3)cc2)c2ccccc21	OGTUYARYUMRJAT-UHFFFAOYSA-N	CES1	Homo sapiens												1							1								3.0	486.16	4.0	0.0	6.0	6.0	4.0	4.74	74.76	PD064520	-
PD064522	CHEMBL222644	CCCCCCCCCCCCN1C(=O)C(=O)c2ccccc21	GQEQKTGRIPEAKW-UHFFFAOYSA-N	CES1	Homo sapiens												1							1								3.0	315.22	2.0	0.0	11.0	2.0	1.0	5.14	37.38	PD064522	-
PD064524	CHEMBL220802	O=C(/C=C/c1ccccc1Cc1ccc2ccccc2c1)NS(=O)(=O)c1cccs1	MOOPBYUCHZCDPA-BUHFOSPRSA-N	PTGER3	Homo sapiens												1				1			1								4.0	433.08	4.0	1.0	6.0	4.0	4.0	5.01	63.24	PD064525	-
PD064526	MK-4256	Cc1nc([C@]2(c3cnn(C)c3)N[C@@H](c3nc(-c4ccc(F)cc4)c[nH]3)Cc3c2[nH]c2ccccc32)no1	NTIFDLOQPKMIJK-AJTFRIOCSA-N	SSTR3	Homo sapiens				1								1	1						1		1						6.0	494.2	7.0	3.0	4.0	7.0	6.0	4.3	113.24	PD064527	-
PD064528	CHEMBL220018	N=C(N)NCCC[C@H](NC(=O)CCc1c[nH]c2ccccc12)C(=O)N1C[C@@H]2CCCN2C[C@@H]1Cc1ccccc1	QJJUWWQDEUFNRO-VBOOUTDYSA-N	MC5R	Homo sapiens												1							1		1						1.0	543.33	4.0	5.0	11.0	5.0	3.0	2.77	130.34	PD064529	-
PD064530	CHEMBL218748	O=C(Cc1ccccc1)N1C[C@@H]2CCCN2C[C@@H]1Cc1ccccc1	QXRXXIKAVZAGHZ-SFTDATJTSA-N	MC1R	Homo sapiens												1							1		1						3.0	334.2	2.0	0.0	4.0	4.0	2.0	3.15	23.55	PD064531	-
PD064532	FASITIBANT	Cc1cc(C)c2cccc(OCc3c(Cl)ccc(S(=O)(=O)NC4(C(=O)N5CCN(C(=O)[C@@H](N)CCC[N+](C)(C)C)CC5)CCOCC4)c3Cl)c2n1	FQVSDHOWSLEEKJ-LJAQVGFWSA-N	BDKRB2	Homo sapiens												1							1		1						1.0	763.28	8.0	2.0	12.0	5.0	3.0	4.05	144.16	PD064533	-
PD064534	CHEMBL218375	CCOC(=O)N1CCC(NS(=O)(=O)c2ccc(NC(=O)c3ccccc3C)c3ccccc23)CC1	LGJRRERRFSZFTJ-UHFFFAOYSA-N	CCR8	Homo sapiens												1							1		1						1.0	495.18	5.0	2.0	6.0	4.0	3.0	4.3	104.81	PD064534	-
PD064536	CHEMBL2180640	CCCCN(CCc1ccccc1)CCc1cccc(O)c1	SDERQNAMIWOFFX-UHFFFAOYSA-N	OPRK1	Homo sapiens												1							1								5.0	297.21	2.0	1.0	9.0	2.0	2.0	4.28	23.47	PD064536	-
PD064538	CHEMBL2180528	CC(C)[C@@H](NC(=O)c1ccccc1)C(=O)N1CCC(c2ccc(Cl)cc2)CC1	TYQNFWIJWOXJPV-OAQYLSRUSA-N	CCR1	Homo sapiens												1							1		1						3.0	398.18	2.0	1.0	5.0	3.0	2.0	4.5	49.41	PD064539	-
PD064540	CHEMBL2179834	CC(=O)N[C@H](CC(C)C)C(=O)N[C@@H](CC(C)C)C(=O)N[C@@H](CC(C)C)C(=O)N[C@@H](CC(C)C)C(=O)N[C@@H](CCCNC(=N)N)C(=O)N[C@H](C(=O)N[C@@H](CCCCN)C(=O)N[C@@H](CCCNC(=N)N)C(N)=O)C(C)C	ZOSNPKYKQJPYEO-OZKMNFSDSA-N	PCSK6	Homo sapiens												1							1		1						2.0	1050.74	12.0	16.0	37.0	0.0	0.0	-1.13	425.71	PD064541	-
PD064542	CHEMBL217941	COc1ccc(Br)cc1S(=O)(=O)NC(=O)/C=C/c1ccccc1Cc1ccc2cc(OCc3ccccc3)ccc2c1	VDVWBLTUVKUGOI-NBVRZTHBSA-N	PTGER3	Homo sapiens												1							1								2.0	641.09	5.0	1.0	10.0	5.0	5.0	7.3	81.7	PD064543	-
PD064544	CHEMBL2178804	Cn1cc(NC(=O)c2cnn3ccc(N)nc23)c(-c2cc(Cl)ccc2Cl)n1	NNGCTIVKZKXWGS-UHFFFAOYSA-N	JAK2	Homo sapiens												1							1		1						7.0	401.06	7.0	2.0	3.0	4.0	4.0	3.27	103.13	PD064544	-
PD064546	CHEMBL2172289	CCN1/C(=C/C=C/C=C/C2=[N+](CC)c3ccc(S(=O)(=O)[O-])cc3C2(C)C)C(C)(CCCC(=O)NCCn2cc(CNC(=O)CCC(=O)NC3CCCN(C(=O)c4ccc(NC(=O)c5ccccc5-c5ccccc5)cc4)c4ccccc43)nn2)c2cc(S(=O)(=O)O)ccc21	JLDUHYJPNRGFMT-UHFFFAOYSA-N	AVPR2	Homo sapiens												1							1		1						3.0	1308.51	14.0	5.0	24.0	10.0	7.0	10.22	285.24	PD064546	-
PD064548	CHEMBL2172288	O=C(CCC(=O)NC1CCCN(C(=O)c2ccc(NC(=O)c3ccccc3-c3ccccc3)cc2)c2ccccc21)NCc1cn(CCOCCOCCOCCNC(=S)Nc2ccc(-c3c4ccc(=O)cc-4oc4cc(O)ccc34)c(C(=O)O)c2)nn1	BHGIBKQRMXLQED-UHFFFAOYSA-N	AVPR2	Homo sapiens												1							1		1						2.0	1205.43	15.0	7.0	25.0	10.0	7.0	9.21	277.81	PD064548	-
PD064550	CHEMBL2172272	CCOC(=O)N1CCN(C(=O)[C@H](CCC(=O)O)NC(=O)c2cc(OCC(=O)N3CCC[C@H]3C(=O)NC3CCC3)n(-c3ccccc3)n2)CC1	FLUYZJFNZSOIKH-AHWVRZQESA-N	P2RY12	Homo sapiens												1							1		1						1.0	681.31	10.0	3.0	13.0	5.0	2.0	1.17	192.71	PD064551	-
PD064552	CHEMBL2172076	O=C1CCCN1c1ccc(S(=O)(=O)N2CCc3ccccc3C2)cc1	QTXMWXSORYCFRR-UHFFFAOYSA-N	AKR1C3	Homo sapiens												1							1		1						1.0	356.12	3.0	0.0	3.0	4.0	2.0	2.56	57.69	PD064552	-
PD064554	CHEMBL2171944	CCc1nc2ccccc2n1-c1nc(N2CCOCC2)c2nc(CN3CCC(C(C)(C)O)CC3)n(C)c2n1	BHXSZKLTWORWNB-UHFFFAOYSA-N	PIK3CD	Homo sapiens												1							1		1						2.0	518.31	10.0	1.0	6.0	6.0	4.0	3.08	97.36	PD064554	-
PD064556	CHEMBL2171169	CC(C)N(CCCNC(=O)Nc1ccc(C(C)(C)C)cc1)C[C@H]1O[C@@H](n2cnc3c(N)ncnc32)[C@H](O)[C@@H]1O	MTLMDZJUGDUTCP-PTGPVQHPSA-N	DOT1L	Homo sapiens									1			1							1								2.0	540.32	10.0	5.0	9.0	4.0	3.0	2.25	163.68	PD028423	-
PD064557	CHEMBL217053	O=C(O)COc1ccc(Br)cc1C(=O)c1cnn(-c2ccccc2)c1	DMFOOUGJUFPBOG-UHFFFAOYSA-N	PTGDR2	Homo sapiens												1							1								1.0	400.01	5.0	1.0	6.0	3.0	3.0	3.33	81.42	PD064557	-
PD064559	CHEMBL2164354	O=C(C1CCCCC1)N(CCN1CC=C(c2ccccc2)CC1)c1ccccn1	YUOLKUGHNOWKJF-UHFFFAOYSA-N	HTR1A	Homo sapiens												1							1		1						7.0	389.25	3.0	0.0	6.0	4.0	2.0	4.78	36.44	PD064559	-
PD064561	CHEMBL2164094	CCCNc1nc(NCc2cn(C)cn2)nc(N2CCC[C@@H]2CNS(=O)(=O)c2ccc(CCC)cc2)n1	RNVLUWRPULKASN-OAQYLSRUSA-N	ADAMTS5	Homo sapiens												1							1		1						4.0	527.28	10.0	3.0	13.0	4.0	3.0	2.94	129.96	PD064562	-
PD064563	CHEMBL2159748	N#C[C@@H]1CCCN1C(=O)c1cccc2c1C(=O)N(Cc1ccccc1)C2	AUHQVJXPKRFCST-KRWDZBQOSA-N	PREP	Homo sapiens												1							1		1		1				1.0	345.15	3.0	0.0	3.0	4.0	2.0	2.97	64.41	PD064564	-
PD064565	CHEMBL2159094	OC[C@H]1O[C@@H](Oc2n[nH]c(C(F)(F)F)c2Cc2ccccc2OCc2ccccc2)[C@H](O)[C@@H](O)[C@@H]1O	VRWBPJPUNCXWHA-MZSWFSNMSA-N	SLC5A1	Homo sapiens												1							1		1						2.0	510.16	8.0	5.0	8.0	4.0	3.0	1.78	137.29	PD064566	-
PD064567	MMG-0358	Oc1ccc(Cl)cc1-c1c[nH]nn1	NBDFMTBYKCBTSW-UHFFFAOYSA-N	IDO1	Homo sapiens												1							1		1						1.0	195.02	3.0	2.0	1.0	2.0	2.0	1.83	61.8	PD064567	-
PD064569	CHEMBL212141	CC(C)NC(=O)[C@H]1CCCN1C(=O)[C@@H]1C[C@@H](O)CN1C(=O)CC(c1ccc(F)cc1)(c1ccc(F)cc1)c1ccc(F)cc1	XNEGPONSGSBZSW-OCBJUFRSSA-N	CHRM3	Homo sapiens												1							1		1						4.0	607.27	4.0	2.0	8.0	5.0	3.0	4.31	89.95	PD064570	-
PD064571	CHEMBL210352	CC(C)Cc1ccc(-c2nc(-c3ccc([C@H]4CC[C@@H](CC(=O)O)N4)cc3)no2)cc1	SJSQQBATFXLXQC-LEWJYISDSA-N	S1PR1	Homo sapiens												1							1		1						3.0	405.21	5.0	2.0	7.0	4.0	3.0	4.87	88.25	PD064572	-
PD064573	CHEMBL209970	CC#CCOc1ccc(S(=O)(=O)CC2(C(=O)NO)CCN(S(=O)(=O)C(C)C)CC2)cc1	CEVLUPQNDFOYSI-UHFFFAOYSA-N	ADAM17	Homo sapiens									1			1							1		1						6.0	472.13	7.0	2.0	8.0	2.0	1.0	1.19	130.08	PD064573	-
PD064575	CHEMBL2088092	Cc1cc(Nc2nc(NCc3cc(C(C)(C)C)no3)ncc2Br)n[nH]1	XKPXDWQAHHLAML-UHFFFAOYSA-N	FGFR1	Homo sapiens												1							1		1						4.0	405.09	7.0	3.0	5.0	3.0	3.0	3.91	104.55	PD064575	-
PD064577	CHEMBL2087491	CS(=O)(=O)N1CCN(Cc2nc3c(N4CCOCC4)nc(-c4cnc(N)nc4)cn3c2Br)CC1	NSQMUBUWCVCQFY-UHFFFAOYSA-N	PIK3CA	Homo sapiens												1							1		1						3.0	551.11	11.0	1.0	5.0	5.0	3.0	0.44	135.08	PD064577	-
PD064579	CHEMBL2087421	COc1cc(C)c(S(=O)(=O)N(C)CCOCC(=O)N2CCN(C3CCN(C)CC3)CC2)c(C)c1	TYDKAHFZLFMNQX-UHFFFAOYSA-N	BDKRB1	Homo sapiens												1							1								1.0	496.27	7.0	0.0	9.0	3.0	1.0	1.19	82.63	PD064579	-
PD064581	CHEMBL2086690	CC(C)c1nc(N2CCN(c3ncc(OCc4ccncc4C#N)cn3)[C@H](C)C2)no1	UNGZTVLHLKAKQE-OAHLLOKOSA-N	GPR119	Homo sapiens												1							1								2.0	420.2	10.0	0.0	6.0	4.0	3.0	2.54	117.09	PD024651	-
PD064582	CHEMBL2064328	Cc1cc(C(C)Nc2ccccc2)c2oc(N3CCOCC3)cc(=O)c2c1	VRCXIJAYLCUSHC-UHFFFAOYSA-N	PIK3CB	Homo sapiens												1							1		1						4.0	364.18	5.0	1.0	4.0	4.0	3.0	4.11	54.71	PD064582	-
PD064583	CHEMBL2062577	CC(=O)N(C)c1ccc2ccn(-c3cc(NC4CC4)n4ncc(C#N)c4n3)c2c1	LEBFBYRNCKITGV-UHFFFAOYSA-N	CSNK2A1	Homo sapiens												1							1		1						2.0	385.17	7.0	1.0	4.0	5.0	4.0	3.1	91.25	PD064583	-
PD064585	CHEMBL2059863	Cc1ccc(-c2ncc(C(F)(F)F)[nH]2)cc1NC(=O)c1ccc(OCc2ccccn2)cc1	BQZARCIQCQXWNH-UHFFFAOYSA-N	SMO	Homo sapiens												1							1		1						2.0	452.15	4.0	2.0	6.0	4.0	4.0	5.63	79.9	PD064585	-
PD064587	CHEMBL2041378	CC(=O)Nc1ccc(S(=O)(=O)Nc2cccc(-c3c(O)ccc4cc(-c5cccc(O)c5)ccc34)c2)cc1	AJKBVOKBNKWIQX-UHFFFAOYSA-N	HSD17B1	Homo sapiens												1							1		1						2.0	524.14	5.0	4.0	6.0	5.0	5.0	6.34	115.73	PD064587	-
PD064589	CHEMBL2032049	C[C@H]1c2c([nH]c3ccc(C(F)(F)F)cc23)C[C@H]2CCN(CCC3(C(=O)O)CCCCC3)C[C@@H]21	WAOZNBXSEVIAGX-MBOZVWFJSA-N	MCHR1	Homo sapiens												1							1		1						3.0	462.25	2.0	2.0	4.0	5.0	2.0	6.21	56.33	PD064590	-
PD064591	CHEMBL2031737	C[C@@H]1CCCN1CCc1cc2cc(C(=O)c3ccc([N+](=O)[O-])cc3)ccc2o1	GPZMWOXSIRVXQW-OAHLLOKOSA-N	HRH3	Homo sapiens												1							1		1						11.0	378.16	5.0	0.0	6.0	4.0	3.0	4.6	76.59	PD064592	-
PD064593	CHEMBL202361	CCCCCCCC(=O)OC[C@H](COP(O)(O)=S)OC(=O)CCCCCCC	CUXSKJSPPDINEH-QGZVFWFLSA-N	LPAR3	Homo sapiens												1							1		1						4.0	440.2	6.0	2.0	18.0	0.0	0.0	4.39	102.29	PD064594	-
PD064595	CHEMBL201482	CCCCCCCCOC[C@H](COP(O)(O)=S)OCCCCCCCC	PLCCQSPJUXGEHV-LJQANCHMSA-N	LPAR3	Homo sapiens												1							1		1						3.0	412.24	4.0	2.0	20.0	0.0	0.0	5.33	68.15	PD024053	-
PD064596	CHEMBL200234	c1cc(N2CCNCC2)c2cc[nH]c2c1	YZKSXUIOKWQABW-UHFFFAOYSA-N	ADRB1	Homo sapiens												1							1		1						2.0	201.13	2.0	2.0	1.0	3.0	2.0	1.58	31.06	PD064596	-
PD064597	CHEMBL194173	CN(C)c1nc(NCC2CCN(S(=O)(=O)c3ccc(Br)cc3OC(F)(F)F)CC2)nc2ccccc12	UHHJLMKELWKRFM-UHFFFAOYSA-N	ADRA2A	Homo sapiens												1							1		1						3.0	587.08	7.0	1.0	7.0	4.0	3.0	4.87	87.66	PD064597	-
PD064599	CHEMBL1940400	COc1cc(O)ccc1/C=C/C(=O)OCCCc1cccc(O)c1	STRRKZLLUNQMGW-CSKARUKUSA-N	AKR1B10	Homo sapiens												1							1		1						2.0	328.13	5.0	2.0	7.0	2.0	2.0	3.3	75.99	PD064600	-
PD064601	CHEMBL1934130	CC(=O)N[C@@H]1CC2(CCN(Cc3ccc4c(c3)c3ccccc3n4C(N)=O)CC2)c2ccccc21	WFKZKRWZCHJQIT-RUZDIDTESA-N	MCHR2	Homo sapiens												1							1		1						4.0	466.24	4.0	2.0	3.0	6.0	4.0	4.84	80.36	PD064602	-
PD064603	CHEMBL1933279	Cn1c(NC(=O)c2ccc3cc4n(c3c2)CCCNC4=O)nc2ccccc21	WIICYVHPNFINMO-UHFFFAOYSA-N	RPS6KA3	Homo sapiens												1							1								2.0	373.15	5.0	2.0	2.0	5.0	4.0	2.91	80.95	PD064603	-
PD064605	CHEMBL1933104	O=C(Nc1ccccc1C(=O)N[C@H](CCc1ccccc1)C(=O)O)c1cc2ccccc2[nH]1	XLWHWNHGNRPPBH-JOCHJYFZSA-N	CCKAR	Homo sapiens												1							1								2.0	441.17	3.0	4.0	8.0	4.0	4.0	4.24	111.29	PD064606	-
PD064607	CHEMBL191879	CC(=O)S[C@@H]1C[C@@H](COCc2cc(F)c(F)cc2F)N(C(=O)Oc2cccc3c2OCCO3)C1	VILIDDZBEXSSLV-JKSUJKDBSA-N	ECE1	Homo sapiens												1							1		1						1.0	497.11	7.0	0.0	6.0	4.0	2.0	4.31	74.3	PD064608	-
PD064610	THAILANDEPSIN A	CC[C@H](C)[C@H]1NC(=O)[C@H]2CSSCC/C=C/[C@H](CC(=O)N[C@H](CCSC)C(=O)N2)OC(=O)C[C@@H]1O	VJXBYUITQBTTQM-DSRNDQRRSA-N	HDAC1	Homo sapiens				1					1			1				1			1		1						6.0	547.18	9.0	4.0	5.0	2.0	0.0	1.65	133.83	PD064611	-
PD064612	CHEMBL1830711	c1cnc(Nc2nc3c(s2)CCCc2n[nH]cc2-3)nc1	HYJWPTWQMAYKAM-UHFFFAOYSA-N	GRM4	Homo sapiens												1							1		1						2.0	284.08	6.0	2.0	2.0	4.0	3.0	2.56	79.38	PD064612	-
PD064614	CHEMBL1829763	C[C@@H](c1ccc(-c2ccc(F)cc2F)cc1)N1CC[C@](CCO)(c2ccc(F)cc2)OC1=O	SLSMHOGJKAPYQU-QLXKLKPCSA-N	HSD11B1	Homo sapiens												1							1		1						5.0	455.17	3.0	1.0	6.0	4.0	3.0	5.95	49.77	PD064615	-
PD064616	CHEMBL1819489	OC[C@H]1C[C@@H](Oc2ccccc2Cc2ccc(C3CC3)cc2)[C@H](O)[C@@H](O)[C@@H]1O	XCRLWQNVUFAWND-FXILAVBZSA-N	SLC5A4	Homo sapiens												1							1		1						2.0	384.19	5.0	4.0	6.0	4.0	2.0	2.0	90.15	PD064617	-
PD064618	CHEMBL1782957	O/N=C/c1c(O)ccc(-c2ccc(O)cc2)c1Cl	OGRZJPRETQPCLH-VIZOYTHASA-N	ESR2	Homo sapiens												1							1								6.0	263.03	4.0	3.0	2.0	2.0	2.0	3.23	73.05	PD064619	-
PD064620	CHEMBL1774995	O=C(N(CCN1CCN(c2ccccc2O)CC1)c1ccccn1)C12C3C4C1C1C2C3C41I	IUEHDTRLKKNLDW-UHFFFAOYSA-N	HTR1A	Homo sapiens												1							1		1						7.0	554.12	5.0	1.0	6.0	9.0	2.0	2.87	59.91	PD064620	-
PD064622	CHEMBL1774023	O=C(Cc1ccc(Cl)cc1)N[C@H](Cc1ccc(Cl)cc1)C(=O)N[C@@H]1C[C@@H]2CC[C@H](C1)N2	VYUFUXRLJDFDIC-CLAROIROSA-N	AVPR1A	Homo sapiens												1							1		1						2.0	459.15	3.0	3.0	7.0	4.0	2.0	3.66	70.23	PD064623	-
PD064624	CHEMBL1773877	Cc1ccc(-c2nc(C(=O)N3CCN(c4cc(C(=O)O)c5ccccc5c4)CC3)ncc2-c2ccc3c(c2)OCCO3)c(F)c1	MAZYNSFCRNJVOU-UHFFFAOYSA-N	CCKAR	Homo sapiens												1							1		1						3.0	604.21	7.0	1.0	5.0	7.0	5.0	5.84	105.09	PD064624	-
PD064626	CHEMBL1766944	CC[C@H](C)[C@H](NC(=O)CN(CCc1ccc(O)cc1)C(=O)[C@@H]1CCCN1C(=O)[C@H](CCCCN)NC(=O)[C@@H](N)CCCNC(=N)N)C(=O)N[C@@H](CC(C)C)C(=O)O	HNTMSUWIPLVWMX-KECVWQCXSA-N	NTSR2	Homo sapiens												1							1		1						2.0	802.51	10.0	10.0	25.0	2.0	1.0	0.11	299.39	PD064627	-
PD064628	CHEMBL1765669	CC(C)C[C@@H]1NC(=O)[C@H](Cc2ccccc2)NC(=O)[C@H](Cc2ccc(O)cc2)NC(=O)C(O)CSSC[C@@H](C(=O)N2CCC[C@H]2C(=O)N[C@@H](CCCCN)C(=O)NCC(=O)O)NC(=O)[C@H](CC(N)=O)NC1=O	RCKPKSSQWGXFSM-GOCTXPOLSA-N	AVPR1B	Homo sapiens												1							1		1						4.0	1042.43	15.0	12.0	18.0	4.0	2.0	-1.92	370.88	PD064629	-
PD064630	CHEMBL1762505	O=C1COc2c(Cl)cc(Cl)cc2N1Cc1nnc(CCc2ccc(Cl)cc2)n1CCC(F)(F)F	SQEQQCICFNBUOP-UHFFFAOYSA-N	SLC5A2	Homo sapiens												1							1		1						3.0	532.04	5.0	0.0	7.0	4.0	3.0	5.9	60.25	PD064630	-
PD064634	CHEMBL173453	Nc1ncnc2c1c(-c1ccccc1)cn2-c1ccc(CNCCO)cc1	WGNQPAWFLWLKBL-UHFFFAOYSA-N	SRC	Homo sapiens												1							1		1						5.0	359.17	6.0	3.0	6.0	4.0	4.0	2.75	88.99	PD064634	-
PD064636	CHEMBL170984	COc1cc2c(Nc3c(Cl)ccc4c3OCO4)ncnc2cc1OCC1CCN(C)CC1	UYKYCBACTCRLLP-UHFFFAOYSA-N	SRC	Homo sapiens									1			1							1		1						4.0	456.16	8.0	1.0	6.0	5.0	3.0	4.48	77.97	PD064636	-
PD064638	CHEMBL1689279	CC1(C)NC(=O)CC[C@@]2(C)[C@H]1CC[C@]1(C)[C@@H]2C(=O)C=C2[C@@H]3C[C@@](C)(NC(N)=O)CC[C@]3(C)CC[C@]21C	OXEJYJIHFPSCHI-LPXJIFNVSA-N	HSD11B2	Homo sapiens												1							1		1						2.0	497.36	3.0	3.0	1.0	5.0	0.0	5.26	101.29	PD064639	-
PD064640	CHEMBL1672547	CC(C)n1cc(-c2ccc(C#N)c(F)c2)c2ccc(NS(C)(=O)=O)cc21	JIKFLEZNTIZKCI-UHFFFAOYSA-N	PGR	Homo sapiens												1							1		1						4.0	371.11	4.0	1.0	4.0	3.0	3.0	4.27	74.89	PD064640	-
PD064642	CHEMBL1672352	CC(C)(C)Cc1c[nH]c(CC(C)(O)c2ccc(-c3ccc(F)cn3)cc2)n1	SQDJZWNPXIGNRP-UHFFFAOYSA-N	BRS3	Homo sapiens												1							1		1						2.0	367.21	3.0	2.0	5.0	3.0	3.0	4.65	61.8	PD064642	-
PD064644	CHEMBL1650645	Oc1cccc(-c2ccc3c(-c4cccnc4)c(O)ccc3c2)c1	AXMKFPDKHLZNID-UHFFFAOYSA-N	HSD17B1	Homo sapiens												1							1								8.0	313.11	3.0	2.0	2.0	4.0	4.0	4.98	53.35	PD064644	-
PD064646	CHEMBL1644614	Cc1cc2c(CCc3nc(-c4ccc(Cl)cc4Cl)oc3C(C)C)noc2cc1OCC(=O)O	JDTVEJCQPMSSOE-UHFFFAOYSA-N	PPARD	Homo sapiens												1							1		1						3.0	488.09	6.0	1.0	8.0	4.0	4.0	6.47	98.59	PD064646	-
PD064648	CHEMBL1643901	CN(Cc1cccc(F)c1)[C@H]1C2C3CC4C5C3CC2C5C41	GACBJAOXQGFNDL-RAOGCBAWSA-N	SLC6A3	Homo sapiens												1							1		1						2.0	283.17	1.0	0.0	3.0	6.0	1.0	3.4	3.24	PD064649	-
PD064650	CHEMBL1641613	Cc1ccccc1/C(=C\CCN1CCC[C@@H](C(=O)O)C1)c1ccccc1F	XZCPNRFCLBNHOY-BAOGCXAUSA-N	SLC6A1	Homo sapiens												1							1		1						1.0	367.19	2.0	1.0	6.0	3.0	2.0	4.75	40.54	PD064651	-
PD064652	CHEMBL1632158	COC(=O)CCCCCN1CCC(CNC(=O)c2c3n(c4ccccc24)CCCO3)CC1	RNXYMZNGMNWKMC-UHFFFAOYSA-N	HTR4	Homo sapiens												1							1		1						10.0	441.26	6.0	1.0	9.0	4.0	2.0	3.6	72.8	PD064652	-
PD064654	CHEMBL1614995	COCCOc1cncc(-c2cc3c(ccc4c5c([nH]c43)CCNC5=O)cn2)c1	ZYTDQGRQFPNBGA-UHFFFAOYSA-N	MAPKAPK2	Homo sapiens												1							1		1						2.0	388.15	5.0	2.0	5.0	5.0	4.0	3.09	89.13	PD064654	-
PD064656	CHEMBL158627	CS(=O)(=O)Oc1ccc2c(c1)CN(CC[C@H]1CC[C@H](NC(=O)/C=C/c3ccc(F)cc3)CC1)C2	WUACSCWYLJHDBV-HNNHSTSXSA-N	DRD3	Homo sapiens												1							1		1						5.0	486.2	5.0	1.0	8.0	4.0	2.0	4.26	75.71	PD064657	-
PD064658	CHEMBL1490082	CC1=C(C(=O)OC(C)C)C(c2ccco2)NC(=O)N1	AMVBLUKTOOTWMN-UHFFFAOYSA-N	ADORA2B	Homo sapiens												1							1		1						6.0	264.11	4.0	2.0	3.0	2.0	1.0	1.86	80.57	PD064658	-
PD064660	CHEMBL1443272	O=C(O)c1cccc(S(=O)(=O)N2Cc3ccccc3C2)c1	PMISBRGEZDFBQM-UHFFFAOYSA-N	AKR1C3	Homo sapiens												1							1								4.0	303.06	3.0	1.0	3.0	3.0	2.0	2.09	74.68	PD064660	-
PD064662	CHEMBL133725	CC1(C)CCC(C)(C)c2nc(-c3ccc(-c4ccc(C(=O)O)cc4)[nH]3)cnc21	RREMNJZTZUKGKQ-UHFFFAOYSA-N	RARA	Homo sapiens												1							1								3.0	375.19	3.0	2.0	3.0	4.0	3.0	5.19	78.87	PD064662	-
PD064664	CHEMBL129530	O[C@@H]1CCN(Cc2ccc(F)cc2)C[C@H]1N1CCC(c2ccccc2)CC1	HPZHSYBCGLDRCT-DHIUTWEWSA-N	SLC18A3	Homo sapiens												1							1		1						2.0	368.23	3.0	1.0	4.0	4.0	2.0	3.64	26.71	PD064665	-
PD064666	CHEMBL1277623	N[C@H]1CCSSC[C@@H](C(=O)NCc2ccccc2CC(=O)O)NC(=O)C[C@H](Cc2ccc(O)cc2)NC1=O	VZYRMNZEFCZSER-BVSLBCMMSA-N	LNPEP	Homo sapiens												1							1		1						2.0	560.18	8.0	6.0	7.0	3.0	2.0	1.35	170.85	PD064667	-
PD064668	CHEMBL1275682	CC[C@H](C)[C@H](NC(=O)[C@@H](N)C(C)C)C(=O)N[C@@H](Cc1cnc[nH]1)C(=O)N1CCC[C@H]1C(=O)N[C@@H](Cc1ccccc1)C(=O)O	FJPCLEAXXQFJFD-KTHKBMNISA-N	LNPEP	Homo sapiens												1							1		1						2.0	611.34	7.0	6.0	15.0	3.0	2.0	0.75	199.61	PD064669	-
PD064670	CHEMBL1269273	CC(=O)O[C@H]1CC[C@@]2(C)[C@@H](CC[C@]3(C)[C@@H]2C(=O)C=C2[C@@H]4C[C@@](C)(C(=O)N(C)O)CC[C@]4(C)CC[C@]23C)C1(C)C	JMPAVZYYYUPQJB-IREBYWSLSA-N	HSD11B2	Homo sapiens												1							1		1						2.0	541.38	5.0	1.0	2.0	5.0	0.0	6.75	83.91	PD064671	-
PD064672	CHEMBL125946	O=c1cnn(-c2cc(Cl)c(Oc3ccc(O)c(S(=O)(=O)N4C5CCC4CC4(CCCO4)C5)c3)c(Cl)c2)c(=O)[nH]1	JHJHCOACTCIKNP-UHFFFAOYSA-N	THRB	Homo sapiens												1							1		1						2.0	594.07	9.0	2.0	5.0	6.0	3.0	3.59	143.82	PD064672	-
PD064674	CHEMBL1258452	CCCCN1CCC(COC(=O)c2ccc(N)c(OC)c2)CC1	DZZIAERGLDKTBT-UHFFFAOYSA-N	HTR4	Homo sapiens												1							1								14.0	320.21	5.0	1.0	7.0	2.0	1.0	2.95	64.79	PD064674	-
PD064676	CHEMBL1243200	CNc1nccc(-c2cccnc2Oc2ccc(NC(=O)c3ccccc3Nc3ccccc3)cc2)n1	YRIZEPGWRQGUBO-UHFFFAOYSA-N	AURKB	Homo sapiens												1							1								2.0	488.2	7.0	3.0	8.0	5.0	5.0	6.37	101.06	PD064676	-
PD064678	CHEMBL1210766	O=C(Nc1cc(F)cc(F)c1)N1CCC2(CC1)C(=O)N(c1cccc(Cl)c1)C2c1ccccn1	YCIFLEOHCOBQNX-UHFFFAOYSA-N	CACNA1H	Homo sapiens												1							1								1.0	482.13	3.0	1.0	3.0	5.0	3.0	5.42	65.54	PD064678	-
PD064680	CHEMBL1209788	Cc1cc2c(cc1Cl)C1(CCN(C(=O)[C@@H]3CN(C4CCOCC4)C[C@H]3c3ccc(F)cc3F)CC1)O[C@@H]2C(C)(C)C#N	BCFFSQJVHOEAAU-MWSYKCOMSA-N	MC4R	Homo sapiens												1							1		1						4.0	597.26	5.0	0.0	4.0	6.0	2.0	6.26	65.8	PD064681	-
PD064682	CHEMBL1209145	CCN1CCN(CCCOc2ccc(-c3cc4c(ncn4C)c(C#N)n3)cc2C(F)(F)F)CC1	WRILSUPEKWTWKI-UHFFFAOYSA-N	CTSS	Homo sapiens												1							1		1						2.0	472.22	7.0	0.0	7.0	4.0	3.0	3.93	70.21	PD064682	-
PD064684	CHEMBL118446	CC1=C2CCc3cc(Cl)ccc3N2CCC1=O	DWGUKGCMIQALCV-UHFFFAOYSA-N	SRD5A1	Homo sapiens												1							1								1.0	247.08	2.0	0.0	0.0	3.0	1.0	3.34	20.31	PD064684	-
PD064686	CHEMBL117465	CC1=CC(C)(C)Nc2ccc(-c3cc(F)cc(C#N)c3)cc21	POQODJWQWWICOY-UHFFFAOYSA-N	PGR	Homo sapiens												1							1		1						2.0	292.14	2.0	1.0	1.0	3.0	2.0	4.97	35.82	PD064686	-
PD064688	CHEMBL1170026	CSCC[C@H](NC(=O)[C@@H]1CCCN1C(=O)[C@H](CCCCN)NC(=O)[C@H](Cc1ccccc1)NC(=O)[C@H](CO)NC(=O)[C@@H](N)Cc1ccc(O)cc1)C(=O)N1CCC[C@H]1C(=O)N[C@@H](CC(C)C)C(=O)N(C)[C@H](C)C(=O)N[C@@H](CCCNC(=N)N)C(=O)O	KHIZCRHIQGTPIA-RUFGCVQFSA-N	C3AR1	Homo sapiens												1							1		1						2.0	1222.65	16.0	14.0	35.0	4.0	2.0	-1.49	427.23	PD064689	-
PD064690	TNP-ATP	Nc1ncnc2c1ncn2[C@@H]1O[C@H](COP(=O)(O)OP(=O)(O)OP(=O)(O)O)[C@H]2OC3(O[C@H]21)C([N+](=O)[O-])=CC(=[N+]([O-])[O-])C=C3[N+](=O)[O-]	LQZBDVDATBCNNN-UHEGPQQHSA-N	P2RX4	Homo sapiens												1							1								9.0	716.98	20.0	5.0	10.0	5.0	2.0	-1.09	392.54	PD042501	-
PD064691	CHEMBL1094208	OC(c1ccc2c(cnn2-c2ccc(F)cc2)c1)(c1cccc(Cl)c1Cl)C(F)(F)F	SGKVPHOMCZNDPT-UHFFFAOYSA-N	NR3C1	Homo sapiens												1							1		1						1.0	454.03	3.0	1.0	3.0	4.0	4.0	6.27	38.05	PD064691	-
PD064693	CHEMBL1087014	Cc1nc(-c2cnc(N3CCC(Oc4ccccc4C(F)(F)F)CC3)s2)no1	OYUCOYCEJWDVQK-UHFFFAOYSA-N	SCD	Homo sapiens												1							1								2.0	410.1	7.0	0.0	4.0	4.0	3.0	4.57	64.28	PD064693	-
PD064695	CHEMBL1081262	Oc1ccc(Nc2nc(-c3cccs3)cs2)cc1	CYHUWUQCNGKSKF-UHFFFAOYSA-N	VCP	Homo sapiens												1							1		1						6.0	274.02	5.0	2.0	3.0	3.0	3.0	4.32	45.15	PD064695	-
PD064697	CHEMBL3577182	CCCCCCCCCCCOc1ccccc1CCC(=O)OC[C@@H](F)COP(=O)(O)OC[C@H](N)C(=O)O	RJDYAPVWZJLYAA-PKTZIBPZSA-N	P2RY10	Homo sapiens												1							1		1						3.0	563.27	8.0	3.0	23.0	1.0	1.0	4.96	154.61	PD064698	-
PD064699	CHEMBL356310	Cc1cccc(C(=O)Nc2ccc3c(c2)C[C@H](NCc2ccccn2)C3)c1-c1ccc(C(F)(F)F)cc1	VFQLHOJNCNGPIK-AREMUKBSSA-N	MTTP	Homo sapiens												1							1								2.0	501.2	3.0	2.0	6.0	5.0	4.0	6.59	54.02	PD064700	-
PD064701	CHEMBL347537	O=C(Nc1cccc(-c2cncc3ccccc23)c1)c1ccccc1NCc1ccncc1	IGMQBINYIPIDJQ-UHFFFAOYSA-N	KDR	Homo sapiens												1							1								10.0	430.18	4.0	2.0	6.0	5.0	5.0	6.16	66.91	PD064701	-
PD064703	CHEMBL3426787	COC(=O)c1c(O)cc(O)c(Cl)c1CCc1nccn1Cc1ccccc1	NCWIQXPFJORNJP-UHFFFAOYSA-N	HSP90B1	Homo sapiens												1							1								3.0	386.1	6.0	2.0	6.0	3.0	3.0	3.57	84.58	PD064703	-
PD064705	CHEMBL3422010	Cc1nc(-c2nnc3n2CCN(C(=O)c2ccc(-c4cccs4)cc2)[C@@H]3C)cs1	BWTVMVHFJRFVFO-CYBMUJFWSA-N	TACR3	Homo sapiens												1							1		1						9.0	421.1	7.0	0.0	3.0	5.0	4.0	4.66	63.91	PD064706	-
PD064707	CHEMBL3421842	Cc1cc2ccccc2c(C(C)(C)NC(=O)[C@@H]2[C@H]3CNC[C@H]32)n1	GSKQCADKMBMWTN-ZSHCYNCHSA-N	SSTR4	Homo sapiens												1							1		1						2.0	309.18	3.0	2.0	3.0	4.0	2.0	2.36	54.02	PD064708	-
PD064709	CHEMBL3421731	Cn1cc(-c2cn(C)c3ccc(Oc4ccc(NC(=O)[C@@H]5CCCN5)cc4)cc23)cn1	JTIOFEOXCFFWJI-QFIPXVFZSA-N	PFKFB3	Homo sapiens												1							1		1						3.0	415.2	6.0	2.0	5.0	5.0	4.0	4.06	73.11	PD064710	-
PD064711	CHEMBL3416861	O=C(c1c[nH]c2cc(Cl)ccc12)N1CCC2(CC1)OCc1ccccc12	FPWHCHLKTSMBLA-UHFFFAOYSA-N	AVPR1A	Homo sapiens												1							1		1						2.0	366.11	2.0	1.0	1.0	5.0	3.0	4.48	45.33	PD064711	-
PD064715	CHEMBL3403664	C[C@H](Nc1ncnc(N)c1C#N)c1nc2ccc(F)cc2c(S(C)(=O)=O)c1-c1ccccc1	HFVANGZKKLPTDI-ZDUSSCGKSA-N	PIK3CD	Homo sapiens												1							1		1						4.0	462.13	8.0	2.0	5.0	4.0	4.0	3.86	134.65	PD064716	-
PD064717	CHEMBL3401388	CCC(CC)CC1(O)CCN(C(=O)Nc2cc(Oc3ccncc3)cc(Oc3ccc(F)cc3)c2)CC1	BGDQNJZBOQYYEC-UHFFFAOYSA-N	S1PR2	Homo sapiens												1							1		1						1.0	507.25	5.0	2.0	9.0	4.0	3.0	6.99	83.92	PD064717	-
PD064720	CHEMBL3398488	CCCCOc1nc(N)c2[nH]c(=O)n(CCCCCC3CCNCC3)c2n1	SUMKUTZWHWYBKB-UHFFFAOYSA-N	TLR7	Homo sapiens												1							1		1						2.0	376.26	7.0	3.0	10.0	3.0	2.0	2.44	110.85	PD064720	-
PD064721	CHEMBL336434	CN(C)c1ccc(Nc2c3ccc(NC(=O)CCN4CCCC4)cc3nc3cc(NC(=O)CCN4CCCC4)ccc23)cc1	RKPYSYRMIXRZJT-UHFFFAOYSA-N	TERT	Homo sapiens												1							1		1					1	2.0	593.35	7.0	3.0	11.0	6.0	4.0	6.05	92.84	PD064721	-
PD064722	CHEMBL3360732	Cc1ccc2oc(=O)c(-c3ccc([N+](=O)[O-])cc3)cc2c1	XGJDMHWEDXLYCE-UHFFFAOYSA-N	MAOB	Homo sapiens												1							1								2.0	281.07	4.0	0.0	2.0	3.0	3.0	3.68	73.35	PD064722	-
PD064724	CHEMBL3357070	OCCN1CCN(c2ccc(-c3ncc4c(n3)N(CCCN3CCOCC3)CC4)cc2)CC1	VQQGQCSLCPMKAG-UHFFFAOYSA-N	TLR9	Homo sapiens									1			1							1		1						1.0	452.29	8.0	1.0	8.0	5.0	2.0	1.34	68.2	PD064724	-
PD064726	CHEMBL3344470	COc1cc2c(cc1O)[C@@H]1Cc3sc(CCCCCl)cc3CN1CC2	MRYWDVLOYWQXCU-KRWDZBQOSA-N	DRD2	Homo sapiens												1							1		1						3.0	377.12	4.0	1.0	5.0	4.0	2.0	4.68	32.7	PD064727	-
PD064728	CHEMBL3342849	CC(C)C(=O)NCc1ccc(Cl)c(-c2nc3cc(-c4ccc(C(F)(F)F)cc4)ncc3c(=O)[nH]2)c1	SXZOHBBSSIEDDY-UHFFFAOYSA-N	PTGES	Homo sapiens												1							1								1.0	500.12	4.0	2.0	5.0	4.0	4.0	5.6	87.74	PD064728	-
PD064730	CHEMBL3335672	COc1ccc(C(=O)Nc2cccc(C(=O)O)c2)c(NC(=O)c2ccc(C(C)(C)C)cc2)c1	NGPVBEGYGDKDJE-UHFFFAOYSA-N	NR1H4	Homo sapiens												1							1		1						4.0	446.18	4.0	3.0	6.0	3.0	3.0	5.2	104.73	PD064730	-
PD064732	CHEMBL3335604	Nc1nc2[nH]c(CCCc3ccc(C(=O)N[C@@H](CC(=O)O)C(=O)O)s3)cc2c(=O)[nH]1	VLHCBXFJXATDOK-NSHDSACASA-N	FOLR1	Homo sapiens												1							1		1						2.0	433.11	7.0	6.0	9.0	3.0	3.0	0.73	191.26	PD064733	-
PD064734	CHEMBL3319604	CCCC[C@H](NC(=O)[C@@H]1CC(F)(F)CN1C(=O)[C@H](C)NC(=O)CN=[N+]=[N-])C(=O)N[C@@H](CC1CCCCC1)C(=O)[C@@]1(C)CO1	BYGWQGGWZMNGGA-MDEFBCHOSA-N	PSMB9	Homo sapiens												1							1		1					1	1.0	611.32	7.0	3.0	15.0	3.0	0.0	2.53	185.97	PD064735	-
PD064736	CHEMBL3319482	CC1=C(C(=O)N[C@H](C)C(=O)N[C@@H](Cc2c[nH]c3ccccc23)C(=O)N[C@@H](Cc2ccccc2)C(=O)[C@@]2(C)CO2)Cc2ccccc21	ADBUEVSHEJICCM-LZNHGOJSSA-N	PSMB8	Homo sapiens												1							1		1						3.0	618.28	5.0	4.0	12.0	6.0	4.0	3.82	132.69	PD064737	-
PD064738	CHEMBL3314362	Cc1cc2c(cc1CN(C)C)CCN(C(=O)c1cc3cc(Cl)ccc3n1C)C2	CKRWGBKIBACFNV-UHFFFAOYSA-N	QRFPR	Homo sapiens												1							1		1						2.0	395.18	3.0	0.0	3.0	4.0	3.0	4.4	28.48	PD064738	-
PD064740	CHEMBL330998	CC(/C=C/C=C(\C)c1ccc2c(c1)C(C)(C)CS2)=C\C(=O)O	LWOPJLGICWVJGG-SEBRYRKESA-N	RARG	Homo sapiens												1							1		1						4.0	314.13	2.0	1.0	4.0	2.0	1.0	5.06	37.3	PD064741	-
PD064742	CHEMBL3299022	FC(F)(F)c1ccccc1-c1cc2cn[nH]c2cc1OCC1CC1	BZTMKWCWKFEAKS-UHFFFAOYSA-N	TRPA1	Homo sapiens												1							1		1						3.0	332.11	2.0	1.0	4.0	4.0	3.0	5.04	37.91	PD064742	-
PD064744	CHEMBL3298923	Cc1cc2[nH]ncc2cc1-c1ccccc1C(F)(F)F	NXFIEIXVSJMOQL-UHFFFAOYSA-N	TRPA1	Homo sapiens				1								1				1			1		1						3.0	276.09	1.0	1.0	1.0	3.0	3.0	4.56	28.68	PD064744	-
PD064746	CHEMBL329536	O=C(CN1CCC(N2CCCCC2)CC1)c1c(COc2ccc(Cl)cc2)n(CCC[C@@H]2CCCNC2)c2ccccc12	XHHLNSWTGQCLAS-MHZLTWQESA-N	NPY1R	Homo sapiens									1			1							1		1						1.0	590.34	6.0	1.0	11.0	6.0	3.0	6.79	49.74	PD076006	-
PD064748	NXT629	CCn1c(CCCc2ccc(-c3ccc(NS(=O)(=O)c4ccccc4)cn3)cc2)nn(Cc2ccc(C(C)(C)C)cc2)c1=O	IRSFLNXJVJKMDT-UHFFFAOYSA-N	PPARA	Homo sapiens												1							1								5.0	609.28	7.0	1.0	11.0	5.0	5.0	6.45	98.88	PD064748	-
PD064750	CHEMBL3261926	N#Cc1ccc(-c2ccc(C[C@@H](C#N)NC(=O)C3(N)CCOCC3)cc2)cc1	NNUFRZJZOXVZIT-FQEVSTJZSA-N	CTSC	Homo sapiens				1								1				1			1		1		1				3.0	374.17	5.0	2.0	5.0	3.0	2.0	2.28	111.93	PD064751	-
PD064752	CHEMBL3261920	CSc1cc(-c2ccc(C[C@@H](C#N)NC(=O)[C@@H]3CCCCN3)cc2)ccc1C#N	NMLYRXXREIIYKN-SFTDATJTSA-N	CTSC	Homo sapiens												1							1		1						3.0	404.17	5.0	2.0	6.0	3.0	2.0	3.64	88.71	PD064753	-
PD064754	CHEMBL3235682	NS(=O)(=O)Oc1ccc(Sc2ccc(OS(N)(=O)=O)cc2)cc1	HRUVZHPJVFCBHT-UHFFFAOYSA-N	STS	Homo sapiens												1							1								1.0	375.99	7.0	2.0	6.0	2.0	2.0	1.0	138.78	PD064754	-
PD064756	CHEMBL3235321	CC1(C)Oc2nc(C(F)(F)F)nc(N)c2N=C1c1ccc2c(c1)CC[C@]21CC[C@@H](CC(=O)O)CC1	YFJNLPDVCDNOMJ-OJPDTXNBSA-N	DGAT1	Homo sapiens												1							1		1						1.0	488.2	6.0	2.0	3.0	5.0	2.0	5.22	110.69	PD064757	-
PD064758	CHEMBL1080585	CCOc1cc(CN2CCC(Nc3nc4cc(C(=O)O)ccc4o3)CC2)cc(OCC)c1Cl	DDDLCIAZEXUUFD-UHFFFAOYSA-N	SSTR5	Homo sapiens												1							1		1						2.0	473.17	7.0	2.0	9.0	4.0	3.0	5.05	97.06	PD064758	-
PD064760	CHEMBL1078231	CCCC[C@H]1CN(CC2CCOCC2)C(=O)OC12CCN(C1(C)CCN(C(=O)c3c(C)ncnc3C)CC1)CC2	CXXVJZRGOOIVOD-SANMLTNESA-N	CCR5	Homo sapiens												1							1		1						2.0	555.38	7.0	0.0	7.0	5.0	1.0	4.61	88.1	PD064761	-
PD064762	CHEMBL1077583	CC[C@H](C)[C@H](NC(=O)[C@H](Cc1ccc(O)cc1)NC(=O)[C@@H](CN)C(C)C)C(=O)N[C@H]1Cc2c([nH]c3ccccc23)CN(CC(=O)N[C@@H](Cc2ccccc2)C(=O)O)C1=O	KWZDTHCITDNKGD-LBVVFWMFSA-N	ANPEP	Homo sapiens												1							1		1						2.0	809.41	8.0	8.0	18.0	5.0	4.0	2.54	236.05	PD064763	-
PD064764	LECANINDOLE D	CC1(C)[C@H](O)CC[C@]2(C)[C@@]3(C)c4[nH]c5ccccc5c4C[C@@H]3CC[C@@]12O	QJRNEHJGTLWRJJ-BVYMYZFFSA-N	PGR	Homo sapiens												1							1		1						1.0	353.24	2.0	3.0	0.0	5.0	2.0	4.31	56.25	PD064765	-
PD064766	CHEMBL101661	C=C(c1ccc(C(=O)O)cc1)c1cc2c(cc1Br)C(C)(C)CCC2(C)C	JRRBUWNHWCKPBW-UHFFFAOYSA-N	RXRA	Homo sapiens												1							1		1						3.0	412.1	1.0	1.0	3.0	3.0	2.0	6.56	37.3	PD064766	-
PD064782	BI-6901	CC1CCN(C(=O)[C@@H](CCn2cccc2C#N)NS(=O)(=O)c2cccc3[nH]ccc23)CC1	BRJXJOWXAFLRTE-OAQYLSRUSA-N	CCR10	Homo sapiens				1				1										1									1.0	453.18	5.0	2.0	7.0	4.0	3.0	2.84	110.99	PD064783	-
PD064791	BI-1935	CCOCCn1cc(C(=O)Nc2ccc(-n3nc(-c4cccnc4)cc3C(F)(F)F)cn2)ccc1=O	KMESAVNRPDKZCQ-UHFFFAOYSA-N	EPHX2	Homo sapiens		1		1			1	1										1									3.0	498.16	8.0	1.0	8.0	4.0	4.0	3.8	103.93	PD064791	-
PD064803	BI 653048	CCS(=O)(=O)c1cc2cc(C[C@](O)(CC(C)(C)c3ccc(F)cc3C(N)=O)C(F)(F)F)[nH]c2cn1	AUIFRJWXYUNPPV-QFIPXVFZSA-N	NR3C1	Homo sapiens				1			1	1										1									6.0	515.15	5.0	3.0	8.0	3.0	3.0	3.8	126.14	PD064804	-
PD064815	BI-1950	C[C@H](NC(=O)c1cnc2n1[C@](C)(Cc1ccc(C#N)cc1)C(=O)N2c1cc(Cl)c(F)c(Cl)c1)C(=O)NC1(c2ccccn2)CC1	JZTTUZXIQIRVAB-FZEVHQGJSA-N	ITGAL	Homo sapiens				1			1	1										1			1						1.0	645.15	7.0	2.0	8.0	6.0	4.0	5.16	133.01	PD064816	-
PD064833	TP-021	O=C1CCc2cc(Nc3cc(OC4CCOCC4)c([N+](=O)[O-])cc3Cl)ccc2N1	RRELDGDKULRRDM-UHFFFAOYSA-N	BCL6	Homo sapiens				1			1											1									2.0	417.11	6.0	2.0	5.0	4.0	2.0	4.43	102.73	PD064833	-
PD064845	RAF709	Cc1ncc(NC(=O)c2cccc(C(F)(F)F)c2)cc1-c1cnc(OC2CCOCC2)c(N2CCOCC2)c1	FYNMINFUAIDIFL-UHFFFAOYSA-N	BRAF	Homo sapiens									1							1			1								3.0	542.21	7.0	1.0	6.0	5.0	3.0	5.12	85.81	PD064845	-
PD069446	SR 13800	CC(C)Cc1nn(C)c(=O)c2c(SCCCO)n(Cc3cccc4ccccc34)cc12	VDAVMXLEMHVXOG-UHFFFAOYSA-N	SLC16A1	Homo sapiens									1										1		1						2.0	435.2	6.0	1.0	8.0	4.0	4.0	4.61	60.05	PD069446	-
PD069468	VU 0409106	Cc1csc(NC(=O)c2cc(F)cc(Oc3cncnc3)c2)n1	AXVLPJHYYFHCHK-UHFFFAOYSA-N	GRM5	Homo sapiens												1							1		1						2.0	330.06	6.0	1.0	4.0	3.0	3.0	3.43	77.0	PD069468	-
PD069508	JJKK 048	O=C(N1CCC(C(c2ccc3c(c2)OCO3)c2ccc3c(c2)OCO3)CC1)n1cncn1	CLSNATLUIXZPMV-UHFFFAOYSA-N	MGLL	Homo sapiens				1								1	1						1		1						2.0	434.16	8.0	0.0	3.0	6.0	3.0	3.25	87.94	PD069508	-
PD069524	25CN-NBOH	COc1cc(CCNCc2ccccc2O)c(OC)cc1C#N	VWEDZTZAXHMZIL-UHFFFAOYSA-N	HTR2A,HTR2C;HTR2C;HTR2A	Homo sapiens		1		1														1									1.0	312.15	5.0	2.0	7.0	2.0	2.0	2.61	74.51	PD069524	-
PD069579	BAY-549	Cc1c[nH]c2nccc(Oc3c(F)cc(Nc4cc(Cl)nc(N)n4)cc3F)c12	NRSGWEVTVGZDFC-UHFFFAOYSA-N	ROCK1,ROCK2;ROCK1;ROCK2	Homo sapiens		1		1			1											1									49.0	402.08	6.0	3.0	4.0	4.0	4.0	4.71	101.74	PD069579	-
PD069581	AR-C155858	Cc1n[nH]c(C)c1Cc1sc2c(c1C(=O)N1C[C@H](O)CO1)c(=O)n(C)c(=O)n2CC(C)C	ISIVOJWVBJIOFM-ZDUSSCGKSA-N	SLC16A1	Homo sapiens									1										1								3.0	461.17	9.0	2.0	5.0	4.0	3.0	1.1	122.45	PD054721	-
PD069643	AMG-PERK-44	Cc1ccc2cc(-c3c(C)ccc(C(=O)c4c(-c5ccccc5)n(C)n(-c5ccccc5)c4=O)c3N)ccc2n1	YPPSMYLMSKHYAY-UHFFFAOYSA-N	EIF2AK3	Homo sapiens				1								1				1			1		1					1	2.0	524.22	6.0	1.0	5.0	6.0	6.0	6.49	82.91	PD069643	-
PD069645	BI-9627	CC(=O)N1CCC(c2ccc(C(=O)NC(=N)N)cc2C(F)(F)F)CC1	QMHRLXNEGYTSRV-UHFFFAOYSA-N	SLC9A1	Homo sapiens				1			1	1										1			1						5.0	356.15	3.0	3.0	2.0	2.0	1.0	2.05	99.28	PD069645	-
PD069774	SB-743921	Cc1ccc(C(=O)N(CCCN)[C@@H](c2oc3cc(Cl)ccc3c(=O)c2Cc2ccccc2)C(C)C)cc1	PGXYIBJJCLWJST-MUUNZHRXSA-N	KIF11	Homo sapiens									1										1								2.0	516.22	4.0	1.0	9.0	4.0	4.0	6.53	76.54	PD028444	-
PD069810	ACHP	N#Cc1c(C2CCNCC2)cc(-c2c(O)cccc2OCC2CC2)nc1N	DYVFBWXIOCLHPP-UHFFFAOYSA-N	IKBKB	Homo sapiens									1										1								2.0	364.19	6.0	3.0	5.0	4.0	2.0	3.16	104.19	PD069810	-
PD070056	NGD-98-2	CCC(CC)Nc1nc(C)c(-c2ccc(OC(F)(F)F)cc2OC)nc1OC	PSUFQBRCUSJTDO-UHFFFAOYSA-N	CRHR1	Homo sapiens												1							1								1.0	399.18	6.0	1.0	8.0	2.0	2.0	4.97	65.5	PD070056	-
PD070065	VU 0357017 hydrochloride	CCOC(=O)N1CCC(NCCNC(=O)c2ccccc2C)CC1	ZBSSIYGXZQZYDM-UHFFFAOYSA-N	CHRM1	Homo sapiens					1													1						1			5.0	333.21	4.0	2.0	6.0	2.0	1.0	1.94	70.67	PD070065	-
PD070070	WYE-687	COC(=O)Nc1ccc(-c2nc(N3CCOCC3)c3cnn(C4CCN(Cc5cccnc5)CC4)c3n2)cc1	VDOCQQKGPJENHJ-UHFFFAOYSA-N	MTOR	Homo sapiens									1										1		1						2.0	528.26	10.0	1.0	6.0	6.0	4.0	3.74	110.53	PD070070	-
PD070142	FIIN-1	C=CC(=O)Nc1cccc(CN2C(=O)N(c3c(Cl)c(OC)cc(OC)c3Cl)Cc3cnc(NCCCCN(CC)CC)nc32)c1	DNVFTXQYIYFQBW-UHFFFAOYSA-N	FGFR1;FGFR2;FGFR3;FGFR4	Homo sapiens			1	1														1					1				4.0	655.24	8.0	2.0	15.0	4.0	3.0	6.61	112.16	PD070142	-
PD070146	PD070146	O=S(=O)(c1ccc(NC(=S)NCc2cccnc2)cc1)N1CCCCC1	NIADLWNDYLCGNO-UHFFFAOYSA-N	NAMPT	Homo sapiens									1										1								8.0	390.12	4.0	2.0	5.0	3.0	2.0	2.74	74.33	PD070146	-
PD070151	PD070151	O=C(O)c1cc2cc(O)ccc2n1Cc1ccc(Cl)c(Cl)c1	BBRSCGBAIAKATH-UHFFFAOYSA-N	CCR2	Homo sapiens				1					1							1			1		1						2.0	335.01	3.0	2.0	3.0	3.0	3.0	4.4	62.46	PD070151	-
PD070152	PD070152	C=CC(=O)Nc1ccc(-n2c(=O)cnc3cnc(Nc4ccc(N5CCN(C)CC5)cc4)nc32)cc1	DRGNKFXIAXKCCX-UHFFFAOYSA-N	FLT3	Homo sapiens									1										1				1				4.0	482.22	9.0	2.0	6.0	5.0	4.0	2.8	108.28	PD070152	-
PD070153	PD070153	O=C1Nc2cc(Br)ccc2/C1=C1/Nc2ccccc2/C1=N\OCCN1CCCC1	KNGAOBKKLCKYNZ-OQBIKMBDSA-N	SRC	Homo sapiens									1										1								6.0	452.08	5.0	2.0	4.0	5.0	2.0	4.05	65.96	PD070826	-
PD070155	PD070155	O=C(NC1Cc2ccccc2N(C[C@@H](O)CO)C1=O)c1cc2cc(Cl)ccc2[nH]1	BANRVMJUSXDIBF-NNJIEVJOSA-N	PYGL	Homo sapiens									1										1								2.0	413.11	4.0	4.0	5.0	4.0	3.0	1.86	105.66	PD070156	-
PD070157	PD070157	Cn1c(-c2[nH]c(-c3ccnc(N)n3)cc2C(N)=O)cc2ccccc21	IYFKRIWGRGFLBL-UHFFFAOYSA-N	CDC7	Homo sapiens									1										1								1.0	332.14	5.0	3.0	3.0	4.0	4.0	2.31	115.61	PD070157	-
PD070158	PD070158	Cn1cc(-c2[nH]c(-c3ccnc(N)n3)cc2C(N)=O)c2ccccc21	NYNANQKQYVAHFV-UHFFFAOYSA-N	CDC7	Homo sapiens									1										1								1.0	332.14	5.0	3.0	3.0	4.0	4.0	2.31	115.61	PD070158	-
PD070159	PD070159	NC(=O)c1cc(-c2ccnc(N)n2)[nH]c1-c1ccc2sccc2c1	WPDINEQTRUOZHZ-UHFFFAOYSA-N	CDC7	Homo sapiens									1										1								1.0	335.08	5.0	3.0	3.0	4.0	4.0	3.03	110.68	PD070159	-
PD070160	PD070160	NC(=O)c1cc(-c2ccncc2)[nH]c1-c1ccc(Br)cc1	GSCKZFSBVHCSKZ-UHFFFAOYSA-N	CDC7	Homo sapiens									1										1								1.0	341.02	2.0	2.0	3.0	3.0	3.0	3.61	71.77	PD070160	-
PD070162	PD070162	NC(=O)c1cc(-c2ccnc(N)n2)[nH]c1-c1csc2ccccc12	AMSJYRQZMOVVGU-UHFFFAOYSA-N	CDC7	Homo sapiens									1										1								1.0	335.08	5.0	3.0	3.0	4.0	4.0	3.03	110.68	PD070162	-
PD070166	PD070166	Cc1ccc(-c2[nH]c(-c3ccncc3)cc2C(N)=O)cc1	RPPQQNWPUSILFF-UHFFFAOYSA-N	CDC7	Homo sapiens									1										1								1.0	277.12	2.0	2.0	3.0	3.0	3.0	3.15	71.77	PD070166	-
PD070167	PD070167	COc1cccc(-c2[nH]c(-c3ccncc3)cc2C(N)=O)c1	GQGDIBZCZVAYNM-UHFFFAOYSA-N	CDC7	Homo sapiens									1										1								1.0	293.12	3.0	2.0	4.0	3.0	3.0	2.85	81.0	PD070167	-
PD070173	PD070173	NC(=O)c1cc(-c2ccncc2)[nH]c1-c1cccc(Br)c1	VCHRCLNIIWLDLA-UHFFFAOYSA-N	CDC7	Homo sapiens									1										1								1.0	341.02	2.0	2.0	3.0	3.0	3.0	3.61	71.77	PD070173	-
PD070174	PD070174	NC(=O)c1c(-c2ccccc2)[nH]c(-c2ccnc(N)n2)c1I	ZFUUZACDRUZMSC-UHFFFAOYSA-N	CDC7	Homo sapiens									1										1								1.0	405.01	4.0	3.0	3.0	3.0	3.0	2.42	110.68	PD070174	-
PD070175	PD070175	NC(=O)c1cc(-c2ccncc2)[nH]c1-c1cccc([N+](=O)[O-])c1	QTMSXNQGBZJNRQ-UHFFFAOYSA-N	CDC7	Homo sapiens									1										1								1.0	308.09	4.0	2.0	4.0	3.0	3.0	2.75	114.91	PD070175	-
PD070176	PD070176	CCn1c(-c2ccnc(N)n2)cc(C(N)=O)c1-c1ccccc1	KMOZGTUUYJFWQK-UHFFFAOYSA-N	CDC7	Homo sapiens									1										1								1.0	307.14	5.0	2.0	4.0	3.0	3.0	2.31	99.82	PD070176	-
PD070178	PD070178	NC(=O)c1cc(-c2ccnc(N)n2)[nH]c1-c1ccsc1	GIEWZQNAONSKKX-UHFFFAOYSA-N	CDC7	Homo sapiens									1										1								1.0	285.07	5.0	3.0	3.0	3.0	3.0	1.88	110.68	PD070178	-
PD070180	PD070180	NC(=O)c1cc(-c2ccncc2)[nH]c1-c1ccccc1[N+](=O)[O-]	AQGTUBOJXORWCG-UHFFFAOYSA-N	CDC7	Homo sapiens									1										1								1.0	308.09	4.0	2.0	4.0	3.0	3.0	2.75	114.91	PD070180	-
PD070181	PD070181	NC(=O)c1c(-c2ccccc2)[nH]c(-c2ccnc(N)n2)c1Cl	PSNUHTHUWXIRLT-UHFFFAOYSA-N	CDC7	Homo sapiens									1										1								1.0	313.07	4.0	3.0	3.0	3.0	3.0	2.47	110.68	PD070181	-
PD070182	PD070182	COc1ccc(-c2[nH]c(-c3ccncc3)cc2C(N)=O)cc1	JAKVUTLQQQVGSN-UHFFFAOYSA-N	CDC7	Homo sapiens									1										1								1.0	293.12	3.0	2.0	4.0	3.0	3.0	2.85	81.0	PD070182	-
PD070186	PD070186	NC(=O)c1cc(-c2ccncc2)[nH]c1-c1cccc(F)c1	DRQCVBMQNBRROV-UHFFFAOYSA-N	CDC7	Homo sapiens									1										1								1.0	281.1	2.0	2.0	3.0	3.0	3.0	2.98	71.77	PD070186	-
PD070187	PD070187	NC(=O)c1cc(-c2ccnc(N)n2)[nH]c1-c1cccs1	CEKJXDVQNFUQAV-UHFFFAOYSA-N	CDC7	Homo sapiens									1										1								1.0	285.07	5.0	3.0	3.0	3.0	3.0	1.88	110.68	PD070187	-
PD070189	PD070189	NC(=O)c1cc(-c2nc(N)ncc2F)[nH]c1-c1ccccc1	PEQPUGZELMBNKY-UHFFFAOYSA-N	CDC7	Homo sapiens									1										1								1.0	297.1	4.0	3.0	3.0	3.0	3.0	1.96	110.68	PD070189	-
PD070191	PD070191	NC(=O)c1cc(-c2ccncc2)[nH]c1-c1ccc(F)cc1	VXDJPSJBLNTNHV-UHFFFAOYSA-N	CDC7	Homo sapiens									1										1								1.0	281.1	2.0	2.0	3.0	3.0	3.0	2.98	71.77	PD070191	-
PD070193	PD070193	NC(=O)c1cc(-c2ccncc2)[nH]c1-c1ccccc1	YWWBPTREUNINAH-UHFFFAOYSA-N	CDC7	Homo sapiens									1										1								1.0	263.11	2.0	2.0	3.0	3.0	3.0	2.84	71.77	PD070193	-
PD070195	PD070195	NC(=O)c1cc(-c2ccncc2)[nH]c1-c1ccccc1F	MPTYZJWCCYPGET-UHFFFAOYSA-N	CDC7	Homo sapiens									1										1								1.0	281.1	2.0	2.0	3.0	3.0	3.0	2.98	71.77	PD070195	-
PD070199	PD070199	NC(=O)c1cc(-c2nc(N)ncc2Cl)[nH]c1-c1ccccc1	HRFOXRNNKCHYHD-UHFFFAOYSA-N	CDC7	Homo sapiens									1										1								1.0	313.07	4.0	3.0	3.0	3.0	3.0	2.47	110.68	PD070199	-
PD070252	L 006235	CN1CCN(c2nc(-c3ccc(C(=O)NC4(C(=O)NCC#N)CCCCC4)cc3)cs2)CC1	FIVYCSWOCXEWSE-UHFFFAOYSA-N	CTSK	Homo sapiens									1										1								4.0	466.22	7.0	2.0	6.0	4.0	2.0	2.63	101.36	PD070252	-
PD070340	PFI-5	Cc1cc2c(ncn2C2(C)CN(C(=O)c3ccn(CC4CCN([C@H]5C=CCCCC5)CC4)c3)C2)c(N)n1	AVKAVKZKOFSSMY-DEOSSOPVSA-N	SMYD2	Homo sapiens				1							1							1									1.0	501.32	7.0	1.0	5.0	6.0	3.0	4.21	85.21	PD060728	-
PD070354	CHEMBL3220052	N=c1ccc2c(-c3ccc(C(=O)NCCCCCCn4cc(CCC#Cc5cccc(CO/N=c6/ccn([C@@H]7O[C@H](COP(=O)(O)OP(=O)(O)O)[C@@H](O)[C@H]7O)c(=O)[nH]6)c5)nn4)cc3C(=O)O)c3ccc(N)c(S(=O)(=O)O)c3oc-2c1S(=O)(=O)O	QVVGTRNOIJACOR-WEYCDDFSSA-N	P2RY6	Homo sapiens												1							1		1						2.0	1243.21	23.0	12.0	23.0	8.0	5.0	2.39	491.22	PD064406	-
PD070355	CHEMBL1762473	N#Cc1ccc(Cl)cc1O[C@H](CCN)c1ccccc1	GPCXUXJZOSOVLY-OAHLLOKOSA-N	NOS2	Homo sapiens												1							1		1						4.0	286.09	3.0	1.0	5.0	2.0	2.0	3.68	59.04	PD064633	-
PD070483	PD070483	CC[C@H](NC)C(=O)N[C@@H]1C(=O)N2[C@H](CC[C@H]2C(=O)NC(c2ccccc2)c2ccccc2)CC[C@@H]1CNC(=O)CCCCC#CC#CCCCCCC(=O)NC[C@H]1CC[C@H]2CC[C@@H](C(=O)NC(c3ccccc3)c3ccccc3)N2C(=O)[C@H]1NC(=O)[C@H](CC)NC	ILUCIOAXXMVZQU-INAHIPECSA-N	BIRC2	Homo sapiens									1										1								2.0	1238.73	10.0	8.0	29.0	8.0	4.0	7.05	239.28	PD080820	-
PD070484	PD070484	CC[C@H](NC)C(=O)N[C@@H]1C(=O)N2[C@@H](CC[C@@H]1CO)CC[C@H]2C(=O)N[C@H](C(=O)NCCCCCCCCNC(=O)[C@@H](NC(=O)[C@@H]1CC[C@@H]2CC[C@H](CO)[C@H](NC(=O)[C@H](CC)NC)C(=O)N21)c1ccccc1)c1ccccc1	YJQFWHYMLWMKJK-MKCFHCORSA-N	BIRC2	Homo sapiens									1										1								2.0	1056.64	12.0	10.0	27.0	6.0	2.0	1.76	279.74	PD081736	-
PD070485	PD070485	CC[C@H](NC)C(=O)N[C@@H]1C(=O)N2[C@H](CC[C@H]2C(=O)NC(c2ccccc2)c2ccccc2)CC[C@@H]1CNC(=O)CCNc1c(NCCC(=O)NC[C@H]2CC[C@H]3CC[C@@H](C(=O)NC(c4ccccc4)c4ccccc4)N3C(=O)[C@H]2NC(=O)[C@H](CC)NC)c(=O)c1=O	SWUBQBCSSORSRT-IAVHZARYSA-N	XIAP	Homo sapiens									1										1								1.0	1230.66	14.0	10.0	28.0	9.0	5.0	3.44	297.48	PD082236	-
PD070486	PD070486	CC[C@H](NC)C(=O)N[C@@H]1C(=O)N2[C@H](CC[C@H]2C(=O)NC(c2ccccc2)c2ccccc2)CC[C@@H]1CNC(=O)CCc1cn(C[C@H]2CC[C@H]3CC[C@@H](C(=O)NC(c4ccccc4)c4ccccc4)N3C(=O)[C@H]2NC(=O)[C@H](CC)NC)nn1	MNFHOUJRTFUIQJ-VMKLHURBSA-N	BIRC2	Homo sapiens									1										1								2.0	1116.63	12.0	7.0	23.0	9.0	5.0	4.64	240.89	PD083371	-
PD070487	PD070487	CC[C@H](NC)C(=O)N[C@@H]1C(=O)N2[C@H](CC[C@H]2C(=O)NC(c2ccccc2)c2ccccc2)CC[C@@H]1CNC(=O)COCCOCCOCC(=O)NC[C@H]1CC[C@H]2CC[C@@H](C(=O)NC(c3ccccc3)c3ccccc3)N2C(=O)[C@H]1NC(=O)[C@H](CC)NC	LPWZUSXPNBYNES-HDOLAXOGSA-N	BIRC2	Homo sapiens									1										1								2.0	1196.66	13.0	8.0	30.0	8.0	4.0	3.59	266.97	PD083651	-
PD070489	PD070489	CC[C@H](NC)C(=O)N[C@@H]1C(=O)N2[C@H](CC[C@H]2C(=O)NC(c2ccccc2)c2ccccc2)CC[C@@H]1CNC(=O)COCCOCCOCCOCC(=O)NC[C@H]1CC[C@H]2CC[C@@H](C(=O)NC(c3ccccc3)c3ccccc3)N2C(=O)[C@H]1NC(=O)[C@H](CC)NC	BIJRXSJGNSNKPL-IYVWSEGVSA-N	XIAP	Homo sapiens									1										1								1.0	1240.69	14.0	8.0	33.0	8.0	4.0	3.6	276.2	PD084180	-
PD070491	PD070491	CC[C@H](NC)C(=O)N[C@@H]1C(=O)N2[C@H](CC[C@H]2C(=O)NC(c2ccccc2)c2ccccc2)CC[C@@H]1CNC(=O)CCCC#CC#CCCCC(=O)NC[C@H]1CC[C@H]2CC[C@@H](C(=O)NC(c3ccccc3)c3ccccc3)N2C(=O)[C@H]1NC(=O)[C@H](CC)NC	FDGOQDOYZLIFKI-BLWMZYLDSA-N	BIRC2	Homo sapiens									1										1								2.0	1196.68	10.0	8.0	26.0	8.0	4.0	5.88	239.28	PD084538	-
PD070492	PD070492	CC[C@H](NC)C(=O)N[C@@H]1C(=O)N2[C@H](CC[C@H]2C(=O)NC(c2ccccc2)c2ccccc2)CC[C@@H]1CNC(=O)c1cn(C[C@H]2CC[C@H]3CC[C@@H](C(=O)NC(c4ccccc4)c4ccccc4)N3C(=O)[C@H]2NC(=O)[C@H](CC)NC)nn1	XQDCNKGNHWZJNL-TWPFRMRKSA-N	BIRC2	Homo sapiens									1										1								2.0	1088.6	12.0	7.0	21.0	9.0	5.0	4.32	240.89	PD084685	-
PD070493	PD070493	CC[C@H](NC)C(=O)N[C@@H]1C(=O)N2[C@H](CC[C@H]2C(=O)NC(c2ccccc2)c2ccccc2)CC[C@@H]1CNC(=O)CCCCc1cn(CCCCc2ccc(CCCCn3cc(CCCCC(=O)NC[C@H]4CC[C@H]5CC[C@@H](C(=O)NC(c6ccccc6)c6ccccc6)N5C(=O)[C@H]4NC(=O)[C@H](CC)NC)nn3)cc2)nn1	IUQSNYOPAPGETG-PRGBZCEMSA-N	BIRC2	Homo sapiens									1										1								2.0	1498.9	16.0	8.0	40.0	11.0	7.0	8.89	300.7	PD085394	-
PD070600	PD070600	C=C/C(=C/C(=O)C[C@H](C)C[C@@H](C)CC[C@H](O)[C@H](C)C(=O)C[C@@H](O)[C@H](C)[C@@H](C)OC(=O)C[C@@H](O)C1=C(C)C(=O)OC1=O)CC	VAIBGAONSFVVKI-CIFLJJJCSA-N	PPP1CC	Homo sapiens									1										1								8.0	606.34	10.0	3.0	20.0	1.0	0.0	3.95	164.5	PD054938	-
PD070653	L-365260	Cc1cccc(NC(=O)N[C@@H]2N=C(c3ccccc3)c3ccccc3N(C)C2=O)c1	KDFQABSFVYLGPM-QFIPXVFZSA-N	CCKBR	Homo sapiens				1					1							1			1		1						3.0	398.17	3.0	2.0	3.0	4.0	3.0	3.96	73.8	PD048844	-
PD070682	ABT-724	c1ccc(N2CCN(Cc3nc4ccccc4[nH]3)CC2)nc1	FRPJGTNLZNXQEX-UHFFFAOYSA-N	DRD4	Homo sapiens				1			1									1		1			1						12.0	293.16	4.0	1.0	3.0	4.0	3.0	2.28	48.05	PD070682	-
PD070688	CGP-71683	Nc1nc(NC[C@H]2CC[C@H](CNS(=O)(=O)c3cccc4ccccc34)CC2)nc2ccccc12	UULIGRNKXHCLQN-WGSAOQKQSA-N	NPY5R	Homo sapiens				1					1							1			1		1					1	13.0	475.2	6.0	3.0	7.0	5.0	4.0	4.56	110.0	PD050285	-
PD070785	BMS-182874	Cc1noc(NS(=O)(=O)c2cccc3c(N(C)C)cccc23)c1C	MJRGSRRZKSJHOE-UHFFFAOYSA-N	EDNRA	Homo sapiens				1								1				1			1		1						11.0	345.11	5.0	1.0	4.0	3.0	3.0	3.31	75.44	PD070785	-
PD070859	CM-272	COc1cc2c(NC3CCN(C)CC3)cc(-c3ccc(C)o3)nc2cc1OCCCN1CCCC1	RLQLKZTYUYIWDB-UHFFFAOYSA-N	EHMT2	Homo sapiens									1										1								2.0	478.29	7.0	1.0	9.0	5.0	3.0	5.18	63.0	PD070859	-
PD070985	U-18666A	CCN(CC)CCO[C@H]1CC[C@@]2(C)C(=CC[C@H]3[C@@H]4CCC(=O)[C@@]4(C)CC[C@@H]32)C1	DMZCCFMMPHJWQY-BKWLFHPQSA-N	NPC1	Homo sapiens		1														1		1									3.0	387.31	3.0	0.0	6.0	4.0	0.0	5.25	29.54	PD043552	-
PD071199	L-733060	FC(F)(F)c1cc(CO[C@H]2CCCN[C@H]2c2ccccc2)cc(C(F)(F)F)c1	FCDRFVCGMLUYPG-ROUUACIJSA-N	TACR1	Homo sapiens												1							1		1						17.0	403.14	2.0	1.0	4.0	3.0	2.0	5.73	21.26	PD034350	-
PD071272	IPP/CNRS-A017	Cc1c(Oc2c(F)cccc2F)c(OC(C)C)nn1-c1ncc(C2CC2)cc1F	JNAABFZPXJJMPX-UHFFFAOYSA-N	DHODH	Homo sapiens				1			1											1			1						3.0	403.15	5.0	0.0	6.0	4.0	3.0	5.45	49.17	PD071272	-
PD071273	A-1211212	CO[C@H]1CC[C@H](CNc2ccc(S(=O)(=O)NC(=O)c3ccc(N4CCN(CC5=C(c6ccc(Cl)cc6)CC(C)(C)CC5)CC4)cc3Oc3cnc4[nH]ccc4c3)cc2[N+](=O)[O-])CC1	CSBKUBOVPUXFLO-MAVVKCOWSA-N	BCL2;BCL2L1	Homo sapiens				1			1		1									1	1								3.0	895.35	11.0	3.0	14.0	8.0	5.0	9.44	172.03	PD071274	-
PD071278	ACBI1	Cc1ncsc1-c1ccc(CNC(=O)[C@@H]2C[C@@H](O)CN2C(=O)[C@@H](NC(=O)C2(F)CC2)C(C)(C)C)c(OCCOc2ccc(CN3CCN(c4cc(-c5ccccc5O)nnc4N)CC3)cc2)c1	IVARZBJJMMUJHI-SQKKEFIPSA-N	SMARCA2;SMARCA4;PBRM1	Homo sapiens		1		1				1										1				1					0.0	935.42	14.0	5.0	16.0	8.0	5.0	5.25	208.6	PD071280	-
PD071365	ICI-199441	CN(C(=O)Cc1ccc(Cl)c(Cl)c1)[C@H](CN1CCCC1)c1ccccc1	AEJOEPSMZCEYJN-HXUWFJFHSA-N	OPRK1	Homo sapiens		1		1														1			1						13.0	390.13	2.0	0.0	6.0	3.0	2.0	4.83	23.55	PD074673	-
PD071413	GTPL8215	COc1cc(Nc2cnc(C#N)c(OC(C)CN(C)C)n2)ncc1-c1cnn(C)c1	IENLGMOXAQMNEH-UHFFFAOYSA-N	CHEK1	Homo sapiens		1		1														1									0.0	408.2	10.0	1.0	8.0	3.0	3.0	2.22	114.01	PD071413	-
PD071415	(6S+6S)-PEG7	Cc1sc2c(c1C)C(c1ccc(Cl)cc1)=N[C@@H](CC(=O)NCCOCCOCCOCCOCCOCCOCCOCCNC(=O)C[C@@H]1N=C(c3ccc(Cl)cc3)c3c(sc(C)c3C)-n3c(C)nnc31)c1nnc(C)n1-2	JNSLBXJNVHYNNW-CXNSMIOJSA-N	BRDT;BRD2;BRD3;BRD4	Homo sapiens		1		1														1									0.0	1132.38	19.0	2.0	30.0	8.0	6.0	7.74	208.95	PD034881	-
PD071417	SCHEMBL17825271	Cc1cc(Cn2c(=O)n(Cc3cnc(C)s3)c(=O)c3cc(S(=O)(=O)NC4(C)CC4)ccc32)n(C)n1	IFWUBRBMMNTBRZ-UHFFFAOYSA-N	PARG	Homo sapiens		1		1												1		1									1.0	514.15	10.0	1.0	7.0	5.0	4.0	1.9	120.88	PD071417	-
PD071419	eCF309	CCOC(Cn1nc(-c2ccc3oc(N)nc3c2)c2c(N)ncnc21)OCC	PSICWGWNIOOULV-UHFFFAOYSA-N	MTOR	Homo sapiens		1		1					1									1	1								6.0	383.17	10.0	2.0	7.0	4.0	4.0	2.2	140.13	PD071419	-
PD071420	3R-RSL3	COC(=O)c1ccc(C2c3[nH]c4ccccc4c3CC(C(=O)OC)N2C(=O)CCl)cc1	TXJZRSRTYPUYRW-UHFFFAOYSA-N	GPX4	Homo sapiens		1																1								1	0.0	440.11	5.0	1.0	4.0	4.0	3.0	3.21	88.7	PD071420	-
PD071424	AMG-232	CC(C)[C@@H](CS(=O)(=O)C(C)C)N1C(=O)[C@@](C)(CC(=O)O)C[C@H](c2cccc(Cl)c2)[C@H]1c1ccc(Cl)cc1	DRLCSJFKKILATL-YWCVFVGNSA-N	MDM2	Homo sapiens		1		1														1									2.0	567.16	4.0	1.0	9.0	3.0	2.0	6.38	91.75	PD033189	-
PD071437	GSK481	CN1C(=O)[C@@H](NC(=O)c2cc(Cc3ccccc3)on2)COc2ccccc21	KNOUWGGQMADIBV-KRWDZBQOSA-N	RIPK1	Homo sapiens		1		1										1				1									1.0	377.14	5.0	1.0	4.0	4.0	3.0	2.42	84.67	PD033197	-
PD071465	Tilfrinib	Oc1cccc(Nc2ccnc3[nH]c4ccccc4c23)c1	RXPZOSHFGJWSLQ-UHFFFAOYSA-N	PTK6	Homo sapiens									1										1		1						8.0	275.11	3.0	3.0	2.0	4.0	4.0	4.17	60.94	PD071465	-
PD071482	Vasopressin antagonist 1867	COc1cccc(-c2nc3ccc(OCCCN4CCCCC4)cc3c(=O)n2CC(=O)NC(C)C)c1	NQOZPTYIJQUKTJ-UHFFFAOYSA-N	AVPR1B	Homo sapiens												1							1		1						1.0	492.27	7.0	1.0	10.0	4.0	3.0	3.85	85.69	PD071482	-
PD071488	PF-05105679	C[C@H](c1ccc(F)cc1)N(Cc1cccc(C(=O)O)c1)C(=O)c1cnc2ccccc2c1	BXNMZRPTQFVRFA-QGZVFWFLSA-N	TRPM8	Homo sapiens				1			1						1			1		1			1						1.0	428.15	3.0	1.0	6.0	4.0	4.0	5.48	70.5	PD033246	-
PD071766	fluvastatin	CC(C)n1c(/C=C/C(O)CC(O)CC(=O)O)c(-c2ccc(F)cc2)c2ccccc21	FJLGEFLZQAZZCD-VAWYXSNFSA-N	HMGCR	Homo sapiens									1										1	1							6.0	411.18	4.0	3.0	8.0	3.0	3.0	4.63	82.69	PD067481	-
PD072438	EDATREXATE	CCC(Cc1cnc2nc(N)nc(N)c2n1)c1ccc(C(=O)N[C@@H](CCC(=O)O)C(=O)O)cc1	FSIRXIHZBIXHKT-MHTVFEQDSA-N	DHFR	Homo sapiens									1							1			1	1							2.0	467.19	9.0	5.0	10.0	3.0	3.0	1.37	207.3	PD069300	-
PD075489	ICX5600078	Oc1cccc(Nc2n[nH]c3ncnc(Nc4cccc(Cl)c4)c23)c1	BUGPWXMPCMTLIX-UHFFFAOYSA-N	EGFR	Homo sapiens									1										1		1						6.0	352.08	6.0	4.0	4.0	4.0	4.0	4.2	98.75	PD075489	-
PD075582	ICX5600079	Clc1cccc(Nc2ncnc3[nH]nc(NCc4ccccc4)c23)c1	BEXPELAOVIOQHQ-UHFFFAOYSA-N	EGFR	Homo sapiens									1										1		1						5.0	350.1	5.0	3.0	5.0	4.0	4.0	4.36	78.52	PD075582	-
PD076119	BI01383298	O=C(NCc1ccc(F)cc1)C1CCN(S(=O)(=O)c2cc(Cl)cc(Cl)c2)CC1	VUOYAALVGSMUHC-UHFFFAOYSA-N	SLC13A5	Homo sapiens				1				1			1							1									1.0	444.05	3.0	1.0	5.0	3.0	2.0	3.85	66.48	PD076119	-
PD076121	TH257	CCCCN(Cc1ccccc1)C(=O)c1ccc(S(=O)(=O)Nc2ccccc2)cc1	VNCIWNGCMAKKEO-UHFFFAOYSA-N	LIMK1;LIMK1,LIMK2;LIMK2	Homo sapiens				1							1			1				1									1.0	422.17	3.0	1.0	9.0	3.0	3.0	4.93	66.48	PD076121	-
PD076123	BAY-6035	C[C@H]1CC(=O)Nc2cc(C(=O)NCCC3CC3)ccc2N1C(=O)N1CC2CC2C1	CKFRXCBNKKOFGO-IGEOTXOUSA-N	SMYD3	Homo sapiens				1						1	1					1		1									0.0	396.22	3.0	2.0	4.0	5.0	1.0	2.83	81.75	PD076124	-
PD076438	RU-SKI 201	CCC(C)CNCC(=O)N1CCc2sccc2C1c1cccc(C)n1	KYOIGHSNTIJBPW-UHFFFAOYSA-N	HHAT	Homo sapiens		1														1		1									1.0	357.19	4.0	1.0	6.0	3.0	2.0	3.56	45.23	PD076438	-
PD076481	SGC3027	CC1=C(C)C(=O)C(C(C)(C)CC(=O)N(CCCCSC[C@H]2O[C@@H](n3cnc4c(N)ncnc43)[C@H](O)[C@@H]2O)Cc2cccc(-c3ccc(Cl)cc3)c2)=C(C)C1=O	MLJVGAYSVYMPSB-MSUKGTQXSA-N	PRMT7	Homo sapiens				1						1	1							1								1	0.0	786.3	12.0	3.0	14.0	6.0	4.0	6.11	173.76	PD076482	-
PD076483	CA93.0	COc1cc(Nc2ccnc3ccc(Br)cc23)cc(OC)c1OC	AUOSKLDNVNGKRR-UHFFFAOYSA-N	GAK	Homo sapiens				1							1			1				1			1						6.0	388.04	5.0	1.0	5.0	3.0	3.0	4.77	52.61	PD076483	-
PD076485	SGC-AAK1-1	CCN(CC)S(=O)(=O)Nc1cccc(-c2ccc3c(NC(=O)C4CC4)n[nH]c3c2)c1	UCBIQZUJJSVQHL-UHFFFAOYSA-N	AAK1;BMP2K	Homo sapiens				1							1			1				1									7.0	427.17	4.0	3.0	8.0	4.0	3.0	3.58	107.19	PD076485	-
PD076541	LGH-447	C[C@@H]1C[C@H](N)C[C@H](c2ccncc2NC(=O)c2ccc(F)c(-c3c(F)cccc3F)n2)C1	VRQXRVAKPDCRCI-ZNMIVQPWSA-N	PIM2;PIM3;PIM1	Homo sapiens		1							1							1		1	1								7.0	440.18	4.0	2.0	4.0	4.0	3.0	5.04	80.9	PD076542	-
PD076559	cpd84	COCCNc1cc(NC(=O)N2CCCc3cc(CN4CCN(C)CC4=O)c(C=O)nc32)ncc1C#N	BHKDKKZMPODMIQ-UHFFFAOYSA-N	FGFR4	Homo sapiens		1		1												1		1			1						1.0	506.24	9.0	2.0	8.0	4.0	2.0	1.48	143.79	PD076559	-
PD076614	GSK2358994	O=c1cc(N2CCOCC2)nc2n(Cc3cccc(Cl)c3Cl)c(C3CC3)nn12	KTMLCPCWNLTDRL-UHFFFAOYSA-N	PIK3CB	Homo sapiens									1										1		1						4.0	419.09	7.0	0.0	4.0	5.0	3.0	2.96	64.66	PD076614	-
PD077669	KISS1-305	CNC(=N)NCCC[C@H](NC(=O)[C@H](CC(C)C)NC(=O)NNC(=O)[C@H](Cc1ccccc1)NC(=O)[C@H](CO)NC(=O)[C@H](CC(N)=O)NC(=O)[C@@H](Cc1ccncc1)NC(=O)[C@H](N)Cc1ccc(O)cc1)C(=O)N[C@@H](Cc1ccccc1)C(N)=O	YSVWFFNZZGLLAI-XNTOLAJGSA-N	KISS1R	Homo sapiens				1			1											1			1						2.0	1164.58	15.0	17.0	32.0	4.0	4.0	-3.08	458.29	PD077670	-
PD077671	BAY-826	Cc1cc(C)c(-n2ccn3nc(-c4cccnc4)cc23)cc1NC(=O)c1cc(C#N)cc(S(F)(F)(F)(F)F)c1	MPASHPJAIUOWCK-UHFFFAOYSA-N	TIE1;TEK;DDR1;DDR2	Homo sapiens		1		1			1											1									7.0	558.13	6.0	1.0	5.0	5.0	5.0	7.59	88.01	PD077671	-
PD077673	BAY-7598	O=C(c1ccc(OCCC2CCOCC2)cc1)[C@H]1CC[C@@H](Cn2nnc3ccccc3c2=O)[C@@H]1C(=O)O	ZGBAPSHWPBXEKN-OPHFCASCSA-N	MMP12	Homo sapiens				1			1											1									1.0	505.22	8.0	1.0	9.0	5.0	3.0	3.6	120.61	PD077674	-
PD077675	BAY-707	CCNC(=O)c1cc2c(N3CCOC[C@H]3C)ccnc2[nH]1	RPMGXDCRCWWCRY-SNVBAGLBSA-N	NUDT1	Homo sapiens				1			1											1			1						3.0	288.16	4.0	2.0	3.0	3.0	2.0	1.54	70.25	PD077676	1
PD131720	BAY-707	CCNC(=O)c1cc2c(N3CCOC[C@@H]3C)ccnc2[nH]1	RPMGXDCRCWWCRY-JTQLQIEISA-N	NUDT1	Homo sapiens		1		1														1									1.0	288.16	4.0	2.0	3.0	3.0	2.0	1.54	70.25	PD077676	1
PD077679	BAY-474	CC1=C(C#N)C(c2ccc3[nH]nc(C)c3c2)C(C#N)=C(C)N1	QKVFMAAIXZONRN-UHFFFAOYSA-N	MET	Homo sapiens				1			1											1			1						2.0	289.13	4.0	2.0	1.0	3.0	2.0	3.15	88.29	PD077679	-
PD077684	TP-004	Cc1nc(N2CC[C@@H](O)C2)ncc1-c1cc(C(F)(F)F)cc2[nH]ncc12	BNTAEJNPQLMGDJ-LLVKDONJSA-N	METAP2	Homo sapiens		1		1			1											1			1						3.0	363.13	5.0	2.0	2.0	4.0	3.0	2.92	77.93	PD077685	-
PD077686	BI 99179	CCC(=O)N[C@H]1CC[C@@H](C(=O)N(C)c2ccc(-c3nc4ccccc4o3)cc2)C1	YNFDIGJKJPNFFD-SJORKVTESA-N	FAS;FASN	Homo sapiens				1			1	1										1									1.0	391.19	4.0	1.0	5.0	4.0	3.0	4.15	75.44	PD077687	-
PD077690	ABT-546	CCCCN(CCCC)C(=O)CN1C[C@H](c2cc(OC)c3c(c2)OCO3)[C@@H](C(=O)O)[C@@H]1CC(C)(C)CCC	OAEWNSKRLBVVBV-QSEAXJEQSA-N	EDNRA	Homo sapiens				1			1											1			1						3.0	532.35	6.0	1.0	15.0	3.0	1.0	5.54	88.54	PD077691	-
PD077692	ABT-100	Cn1cncc1[C@@](O)(COc1ccc(C#N)cc1-c1ccc(OC(F)(F)F)cc1)c1ccc(C#N)cc1	HEUVRFNVTLGKMZ-AREMUKBSSA-N	FNTB	Homo sapiens		1		1														1									1.0	504.14	7.0	1.0	7.0	4.0	4.0	5.04	104.09	PD077693	1
PD134044	A-409100	Cn1cncc1[C@](O)(COc1ccc(C#N)cc1-c1ccc(OC(F)(F)F)cc1)c1ccc(C#N)cc1	HEUVRFNVTLGKMZ-SANMLTNESA-N	FNTB	Homo sapiens				1			1											1									2.0	504.14	7.0	1.0	7.0	4.0	4.0	5.04	104.09	PD077693	1
PD077694	CRTH2 antagonist	CN([C@@H]1CCc2c(CC(=O)O)c3ccccc3n2C1)S(=O)(=O)c1ccc(F)cc1	JTCAGRAKUAAYDY-OAHLLOKOSA-N	PTGDR2	Homo sapiens				1			1											1			1						9.0	416.12	4.0	1.0	5.0	4.0	3.0	3.04	79.61	PD099568	-
PD077696	ERKi	C[C@@H](NC(=O)Nc1cc2[nH]ncc2c(CO)n1)c1ccccc1	RAXZSEGXMBWYQK-SNVBAGLBSA-N	MAPK1,MAPK3;MAPK1;MAPK3	Homo sapiens				1			1											1									15.0	311.14	4.0	4.0	4.0	3.0	3.0	2.33	102.93	PD077697	-
PD077698	MRK-560	O=S(=O)(NC1CCC(c2cc(F)ccc2F)(S(=O)(=O)c2ccc(Cl)cc2)CC1)C(F)(F)F	WDZVWDXOIGQJIO-UHFFFAOYSA-N	APP	Homo sapiens				1			1											1			1						2.0	517.02	4.0	1.0	5.0	3.0	2.0	4.67	80.31	PD077698	-
PD077699	MRL-650	CC(=O)Nc1c(C(C)=O)c(=O)n(C)c2nc(-c3ccc(Cl)cc3Cl)c(-c3ccc(Cl)cc3)cc12	VHSIAYLBCLUAFT-UHFFFAOYSA-N	CNR1	Homo sapiens				1			1											1			1						6.0	513.04	5.0	1.0	4.0	4.0	4.0	6.39	81.06	PD077699	-
PD077701	MRL-SYKi	Cc1cc(Nc2nccc(C)n2)cc(-c2cnc([C@@]3(O)CC[C@H](C(=O)O)C(C)(C)C3)s2)c1	OYKPWSZSBLRRPL-HOYKHHGWSA-N	SYK	Homo sapiens				1			1											1									12.0	452.19	7.0	3.0	5.0	4.0	3.0	5.06	108.23	PD077702	-
PD078329	SAR-020106	C[C@H](CN(C)C)Oc1nc(Nc2cc3cccc(Cl)c3cn2)cnc1C#N	SRBJWIBAMIKCMV-GFCCVEGCSA-N	CHEK1	Homo sapiens									1										1		1						3.0	382.13	7.0	1.0	6.0	3.0	3.0	3.62	86.96	PD078330	-
PD078419	THZ531	CN(C)C/C=C/C(=O)Nc1ccc(C(=O)N2CCC[C@@H](Nc3ncc(Cl)c(-c4c[nH]c5ccccc45)n3)C2)cc1	RUBYHLPRZRMTJO-MOVYNIQHSA-N	CDK13;CDK12	Homo sapiens		1	1	1										1				1					1				6.0	557.23	6.0	3.0	8.0	5.0	4.0	5.05	106.25	PD086838	-
PD078636	BI 831266	CC(C)NC(=O)[C@H]1CCC[C@H]1Nc1nc(Nc2ccc(C(=O)N(C)C3CCN(C)CC3)cc2)ncc1Cl	BFQXKVQNLASVSU-JTHBVZDNSA-N	AURKB	Homo sapiens				1				1										1									0.0	527.28	7.0	3.0	8.0	4.0	2.0	4.15	102.49	PD078637	-
PD078638	BI-2545	O=C(NC[C@H]1[C@@H]2CN(C(=O)OCc3cc(C(F)(F)F)cc(C(F)(F)F)c3)C[C@H]12)c1ccc2nn[nH]c2c1	ZDOBSAPHUUUOHX-OSYLJGHBSA-N	ENPP2	Homo sapiens		1		1			1	1										1									4.0	527.14	5.0	2.0	5.0	5.0	3.0	4.24	100.21	PD076593	-
PD078639	BI-3802	CNC(=O)COc1cc2cc(Nc3nc(N4C[C@@H](C)C[C@@H](C)C4)ncc3Cl)ccc2n(C)c1=O	GXTJETQFYHZHNB-GASCZTMLSA-N	BCL6	Homo sapiens		1		1				1										1									1.0	484.2	8.0	2.0	6.0	4.0	3.0	3.33	101.38	PD078640	-
PD078641	BI-3812	CNC(=O)COc1cc2cc(Nc3nc(N4CCC(C(=O)N(C)C)CC4)ncc3Cl)cc(OC)c2n(C)c1=O	XCGYXEVLQIIEJH-UHFFFAOYSA-N	BCL6	Homo sapiens		1		1				1										1									0.0	557.22	10.0	2.0	8.0	4.0	3.0	2.16	130.92	PD078641	-
PD078643	BI 639667	CS(=O)(=O)c1cc(C2(NC(=O)c3cncc4c3cnn4-c3ccc(F)cc3)CC2)ccn1	PXQATVYJKMMHAU-UHFFFAOYSA-N	CCR1	Homo sapiens				1			1	1										1			1						2.0	451.11	7.0	1.0	5.0	5.0	4.0	2.78	106.84	PD078643	-
PD078645	BI-1347	CN(C)C(=O)Cn1cc(-c2ccc(-c3cncc4ccccc34)cc2)cn1	WULUGQONDYDNKY-UHFFFAOYSA-N	CDK8	Homo sapiens				1				1										1									2.0	356.16	4.0	0.0	4.0	4.0	4.0	3.85	51.02	PD078645	-
PD078647	BI 665915	CN(C)C(=O)Cn1cc(-c2nc([C@@](C)(c3ccc(-c4cnc(N)nc4)cc3)C3CC3)no2)cn1	QGPXEIMWTKWHMH-DEOSSOPVSA-N	ALOX5AP	Homo sapiens				1			1	1								1		1			1						2.0	458.22	9.0	1.0	7.0	5.0	4.0	2.78	128.85	PD064768	-
PD078648	DELEOBUVIR	Cn1c(C2(NC(=O)c3ccc4c(C5CCCC5)c(-c5ncc(Br)cn5)n(C)c4c3)CCC2)nc2ccc(/C=C/C(=O)O)cc21	BMAIGAHXAJEULY-UKTHLTGXSA-N	NS5B	Hepatitis C virus genotype 1b (strain HC-J4) (HCV)				1			1	1										1									1.0	652.18	7.0	2.0	7.0	7.0	5.0	6.85	114.93	PD078649	-
PD078650	BI-1230	COc1ccc2c(O[C@@H]3C[C@H]4C(=O)N[C@]5(C(=O)O)CC5/C=C\CCCCC[C@H](NC(=O)OC5CCCC5)C(=O)N4C3)cc(-c3csc(NC(=O)C(C)C)n3)nc2c1C	YQCVJBZPFAJZFJ-DVUQJCTJSA-N		Flaviviridae Hepacivirus				1			1	1										1									3.0	816.35	11.0	4.0	9.0	7.0	3.0	6.14	198.38	PD078651	-
PD078652	BI-1388	COc1ccc2c(O[C@@H]3C[C@H]4C(=O)N[C@]5(C(=O)NS(=O)(=O)C6(C)CC6)CC5/C=C\CCCCC[C@H](NC(=O)c5ccn(C)n5)C(=O)N4C3)cc(OC(C)C)nc2c1C	WSEPMWSQALXHKW-MRAROMNFSA-N		Flaviviridae Hepacivirus				1				1										1									0.0	819.36	12.0	3.0	10.0	7.0	3.0	3.61	200.15	PD078653	-
PD078654	BI 1002494	COc1cc(-c2cc3ncccc3c(O[C@H](C)[C@H]3CNC(=O)C3)n2)cc(OC)c1OC	BRYUNLVJDCMANZ-UKRRQHHQSA-N	SYK	Homo sapiens				1				1										1									1.0	423.18	7.0	1.0	7.0	4.0	3.0	3.23	91.8	PD078655	-
PD078656	BI-167107	Cc1ccccc1CC(C)(C)NC[C@H](O)c1ccc(O)c2c1OCC(=O)N2	NWQXBEWHTDRJIP-KRWDZBQOSA-N	ADRB2	Homo sapiens				1				1										1									0.0	370.19	5.0	4.0	6.0	3.0	2.0	2.68	90.82	PD078657	-
PD078676	NIK SMI1	COc1cc(C(N)=O)nc(-c2cccc(C#C[C@]3(O)CCN(C)C3=O)c2)c1	LQSHXYHWYGKAMX-FQEVSTJZSA-N	MAP3K14	Homo sapiens		1		1					1									1	1		1						4.0	365.14	5.0	2.0	3.0	3.0	2.0	0.8	105.75	PD078677	-
PD079516	FK228	C/C=C1\NC(=O)[C@H]2CSSCCC=C[C@H](CC(=O)N[C@H](C(C)C)C(=O)N2)OC(=O)[C@H](C(C)C)NC1=O	OHRURASPPZQGQM-HMLXJHLFSA-N	NCOR1;HDAC1;HDAC2;HDAC3;HDAC8;HDAC3,NCOR1	Homo sapiens		1		1					1				1					1	1	1	1						17.0	540.21	8.0	4.0	2.0	2.0	0.0	1.43	142.7	PD065406	-
PD080084	SM 324405	CCCCOc1nc(N)c2[nH]c(=O)n(Cc3cccc(CC(=O)OC)c3)c2n1	MXILFZWMVNDOIZ-UHFFFAOYSA-N	TLR7	Homo sapiens									1										1		1						1.0	385.18	8.0	2.0	8.0	3.0	3.0	1.64	125.12	PD080084	-
PD080238	AT1	CC(=O)N[C@H](C(=O)N1C[C@H](O)C[C@H]1C(=O)NCc1ccc(-c2scnc2C)cc1)C(C)(C)SCCCCCCNC(=O)C[C@@H]1N=C(c2ccc(Cl)cc2)c2c(sc(C)c2C)-n2c(C)nnc21	SQNZDYHMCMIGGV-TZPPCSJFSA-N	BRD4	Homo sapiens		1		1														1				1					0.0	971.34	13.0	4.0	18.0	7.0	5.0	7.59	183.8	PD080239	-
PD080297	BDBM50019969	Cc1nc(-c2ccc(C(F)(F)F)cc2)sc1COc1ccc([C@H](CC(=O)O)c2ccon2)cc1	BMLGZNVPWRUVNM-IBGZPJMESA-N	FFAR1	Homo sapiens		1																1									1.0	488.1	6.0	1.0	8.0	4.0	4.0	6.31	85.45	PD080298	-
PD080376	CM11	Cc1ncsc1-c1ccc(CNC(=O)[C@@H]2C[C@@H](O)CN2C(=O)[C@@H](NC(=O)COCCOCCOCCOCCOCCOCC(=O)N[C@H](C(=O)N2C[C@H](O)C[C@H]2C(=O)NCc2ccc(-c3scnc3C)cc2)C(C)(C)C)C(C)(C)C)cc1	WGJCHHJGGFCCRS-DEYDLUNASA-N	VHL	Homo sapiens		1		1														1				1					0.0	1178.54	18.0	6.0	31.0	6.0	4.0	3.57	278.64	PD080377	-
PD080672	PD080672	CCOc1cc2ncc(C#N)c(Nc3ccc(OCc4ccccn4)c(Cl)c3)c2cc1NC(=O)CCN(C)C	FVHRPBPPQDUXSJ-UHFFFAOYSA-N	EGFR	Homo sapiens									1										1								2.0	544.2	8.0	2.0	11.0	4.0	4.0	5.77	112.4	PD080672	-
PD080674	PD080674	O=C(CCNC(=O)/C(Cc1ccc(O)c(Br)c1)=N/O)NO	OFVVEEGKXCCFDK-OQLLNIDSSA-N	HDAC1	Homo sapiens									1										1								5.0	359.01	6.0	5.0	6.0	1.0	1.0	0.54	131.25	PD080675	-
PD080676	PD080676	COc1ccc(/C=C/C(=O)Nc2cc3c(Nc4ccc(F)c(Cl)c4)ncnc3cc2O[C@H]2CCOC2)c(OC)c1OC	OELHXJQUNXVIPN-SQUITACLSA-N	EGFR	Homo sapiens									1										1								2.0	594.17	9.0	2.0	10.0	5.0	4.0	6.01	113.06	PD080677	-
PD080678	PD080678	Nc1ccc([C@@H]2C[C@H]2C(=O)Nc2ccc(S(=O)(=O)c3ccccc3)cc2)cn1	CTZSMGLKBKOIGG-RBUKOAKNSA-N	NAMPT	Homo sapiens									1										1								2.0	393.11	5.0	2.0	5.0	4.0	3.0	3.24	102.15	PD080679	-
PD080680	PD080680	Cn1cc(/C=C2\Oc3cccc(O)c3C2=O)c2c(-c3ccc(C(=O)N4CC5CCC(C4)O5)cc3)ccnc21	WPNCPKGXCPBKKQ-MXAYSNPKSA-N	MTOR	Homo sapiens									1										1								2.0	507.18	7.0	1.0	3.0	7.0	4.0	4.57	93.89	PD080681	-
PD080682	PD080682	CCCc1cc2c(cc1N1CCN(C3COC3)CC1)C(C)(C)c1[nH]c3cc(C#N)ccc3c1C2=O	OUQRQZVDADPPCN-UHFFFAOYSA-N	ALK	Homo sapiens									1										1								1.0	468.25	5.0	1.0	4.0	6.0	3.0	4.38	72.36	PD080682	-
PD080684	PD080684	Cc1nc(NCC#N)nc(-n2c(Nc3cc[nH]n3)nc3ccccc32)n1	XPLCDRVACNNQQT-UHFFFAOYSA-N	MTOR	Homo sapiens									1										1		1						5.0	346.14	9.0	3.0	5.0	4.0	4.0	1.92	133.02	PD080684	-
PD080686	PD080686	CC[C@@]1(O)C(=O)OCc2c1cc1n(c2=O)Cc2c-1nc1ccccc1c2/C=N/NC(=O)COCCOCCOCC(=O)NCc1ccc(C[C@@H]2NC(=O)[C@@H](Cc3ccccc3)NC(=O)[C@H](CC(=O)O)NC(=O)CNC(=O)[C@H](CCCNC(=N)N)NC2=O)cc1	YYYKEWBUGLVEQB-OTDHXNBNSA-N	ITGB3	Homo sapiens									1										1								3.0	1227.5	19.0	12.0	25.0	8.0	5.0	-1.51	424.37	PD080687	-
PD080688	PD080688	O=c1cc(C2CCCC2)cccc1O	GWRCCABSMRGDID-UHFFFAOYSA-N	HDAC2	Homo sapiens									1										1								3.0	190.1	2.0	1.0	1.0	2.0	1.0	2.41	37.3	PD080688	-
PD080690	PD080690	CC(C)S(=O)(=O)c1cccc(Oc2ccc(Cl)c(-n3cnc4c(C(F)(F)F)cccc43)c2)c1	GBFXOJGYUQWRBP-UHFFFAOYSA-N	NR1H3	Homo sapiens									1										1								2.0	494.07	5.0	0.0	5.0	4.0	4.0	6.67	61.19	PD080690	-
PD080692	PD080692	NC(=O)c1c(Oc2cccc(CNS(N)(=O)=O)c2)cc(F)c(F)c1Nc1ccc(I)cc1F	KQYTZJXGFPXBER-UHFFFAOYSA-N	MAP2K1	Homo sapiens									1										1								2.0	591.99	5.0	4.0	8.0	3.0	3.0	3.64	136.54	PD080692	-
PD080694	PD080694	CN1CCN(C(=O)[C@@H]2C[C@H](S(=O)(=O)c3ccccc3)C[C@H]2C(=O)NC2(C#N)CC2)CC1	WVOCVZMVWVIUTD-GUDVDZBRSA-N	CTSS	Homo sapiens									1										1								3.0	444.18	6.0	1.0	5.0	4.0	1.0	0.8	110.58	PD080695	-
PD080696	PD080696	CN(C)CCn1ccc2c(N3CCOCC3)nc(-c3cccc(CO)c3)nc21	MBPIZZPEILYOKF-UHFFFAOYSA-N	PIK3CA	Homo sapiens									1										1								1.0	381.22	7.0	1.0	6.0	4.0	3.0	1.99	66.65	PD080696	-
PD080698	PD080698	O=C(N[C@@H](c1ccccn1)C1CC1)c1ccc2[nH]nc(-c3ccc(N4[C@H]5CC[C@H]4CC(O)C5)cc3)c2c1	DUKJABPGWUISRC-SBZVUBOMSA-N	TTK	Homo sapiens									1										1		1						12.0	493.25	5.0	3.0	6.0	7.0	4.0	5.0	94.14	PD080699	1
PD082744	PD082744	O=C(N[C@H](c1ccccn1)C1CC1)c1ccc2[nH]nc(-c3ccc(N4[C@H]5CC[C@H]4CC(O)C5)cc3)c2c1	DUKJABPGWUISRC-BOSRLCDASA-N	TTK	Homo sapiens									1										1								3.0	493.25	5.0	3.0	6.0	7.0	4.0	5.0	94.14	PD080699	1
PD080700	PD080700	CC(C)(O)Cn1cc(-c2ccc3c(c2)OCCc2sc(-c4ncnn4CC(F)(F)F)nc2-3)cn1	VRJUJTMBOARYOG-UHFFFAOYSA-N	PIK3CG	Homo sapiens									1										1								3.0	490.14	9.0	1.0	5.0	5.0	4.0	4.2	90.88	PD080700	-
PD080702	PD080702	CC[C@@H](CS(=O)(=O)C(C)(C)C)N1C(=O)[C@@](C)(CC(=O)O)C[C@H](c2cccc(Cl)c2)[C@H]1c1ccc(Cl)cc1	AXQMSOFCQLTJGV-ZJTSJXPUSA-N	MDM2	Homo sapiens									1										1		1						2.0	567.16	4.0	1.0	8.0	3.0	2.0	6.52	91.75	PD080703	-
PD080704	PD080704	CCn1ncc2c(N3CC4CCC(C3)O4)nc(-c3ccc(NC(=O)Nc4ccc(N5CCCC5)cc4)cc3)nc21	WLTGGZJCDZMNBZ-UHFFFAOYSA-N	MTOR	Homo sapiens									1										1		1						2.0	538.28	8.0	2.0	6.0	7.0	4.0	5.13	100.44	PD080704	-
PD080706	PD080706	O=C1NCc2[nH]c3c(ccc4cnc(-c5cccc(OCCN6CCOCC6)c5)cc43)c21	TUZYUHMHEXTLNB-UHFFFAOYSA-N	MAPK9	Homo sapiens									1										1								2.0	428.18	5.0	2.0	5.0	6.0	4.0	3.34	79.48	PD080706	-
PD080708	PD080708	CCn1ncc2c(N3CC4CCC(C3)O4)nc(-c3ccc(NC(=O)Nc4ccc(OCCN(C)C)cc4)cc3)nc21	PZMZFBMKDSXMES-UHFFFAOYSA-N	MTOR	Homo sapiens									1										1								1.0	556.29	9.0	2.0	9.0	6.0	4.0	4.47	109.67	PD080708	-
PD080710	PD080710	O=C(N[C@H](c1ccccc1)C1CC1)c1ccc2[nH]nc(-c3ccc(N4[C@H]5CC[C@H]4CC(O)C5)cc3)c2c1	IJLJKUAGUGROTM-IALVYGIMSA-N	TTK	Homo sapiens									1										1								2.0	492.25	4.0	3.0	6.0	7.0	4.0	5.6	81.25	PD080711	-
PD080712	PD080712	CCC(C(=O)N[C@@H](CC(=O)O)C(=O)CSCc1ccccc1)n1ccnc(NCc2noc(C)n2)c1=O	VBXOCZFAWPHIJQ-ZENAZSQFSA-N	CASP3	Homo sapiens									1										1								3.0	528.18	11.0	3.0	14.0	3.0	3.0	1.96	169.31	PD080713	-
PD080714	PD080714	CN(C)C(=O)c1cccc(-c2ccnc3c2c(/C=C2\Oc4cccc(O)c4C2=O)cn3C)c1	NIZRMSMNHMOGRS-BKUYFWCQSA-N	MTOR	Homo sapiens									1										1								2.0	439.15	6.0	1.0	3.0	5.0	4.0	4.26	84.66	PD080715	-
PD080716	PD080716	Cc1cc(Nc2nn(CC(=O)c3ccccc3)c(=O)c3ccccc23)n[nH]1	ZYWAUCIAPLYMIZ-UHFFFAOYSA-N	AURKA	Homo sapiens									1										1								2.0	359.14	6.0	2.0	5.0	4.0	4.0	3.05	92.67	PD080716	-
PD080718	PD080718	Nc1nc2c3ccc(NCCO)cc3nc(Cc3ccc4c(c3)OCO4)n2n1	QPVNTDBWWRFMIC-UHFFFAOYSA-N	HSP90AB1	Homo sapiens									1										1								1.0	378.14	9.0	3.0	5.0	5.0	4.0	1.58	119.82	PD080718	-
PD080720	PD080720	CCn1nc(Cc2ccccc2)cc1C1CCN(C[C@H]2CN([C@@H](C(=O)O)C(C)C)C[C@@H]2c2cccc(F)c2)CC1	QTGSINBFNYAXSI-HYRLGQOJSA-N	CCR5	Homo sapiens									1										1		1						1.0	546.34	5.0	1.0	10.0	5.0	3.0	5.64	61.6	PD088614	-
PD080722	PD080722	Nc1ccc(-c2nc(N3CC4CCC(C3)O4)c3sccc3n2)cn1	YTNADJDHKAORBK-UHFFFAOYSA-N	MTOR	Homo sapiens									1										1								2.0	339.12	7.0	1.0	2.0	5.0	3.0	2.7	77.16	PD080722	-
PD080724	PD080724	C=CCN(C(=O)OCc1ccc([N+](=O)[O-])cc1)C1CCN(CCC(C)(Cn2cnc3ccccc32)c2ccccc2)CC1	ZEZTUVDVWYRRGY-UHFFFAOYSA-N	CCR5	Homo sapiens									1										1								1.0	581.3	7.0	0.0	12.0	5.0	4.0	6.58	93.74	PD080724	-
PD080726	PD080726	COc1cc(-c2nn(CCN3CCN(C)CC3)c3ncnc(N)c23)ccc1NC(=O)OC(C)(C)C	OHWUPSZMHRLUMQ-UHFFFAOYSA-N	SRC	Homo sapiens									1										1		1						2.0	482.28	10.0	2.0	6.0	4.0	3.0	2.68	123.66	PD080726	-
PD080728	PD080728	CC(C)C[C@H](N[C@@H](c1ccc(-c2cccc3[nH]ccc23)cc1)C(F)(F)F)C(=O)NCC#N	TVZIAMLRFHJDFH-VXKWHMMOSA-N	CTSK	Homo sapiens									1										1								4.0	442.2	3.0	3.0	8.0	3.0	3.0	5.08	80.71	PD080729	-
PD080730	PD080730	O=C(CC(Nc1ccc(Oc2cc(NC(=O)N3CCCC3)ncn2)c(F)c1)C(F)(F)F)Nc1ccccc1	YKCBBFUAFHUPJE-UHFFFAOYSA-N	KDR	Homo sapiens									1										1								1.0	532.18	6.0	3.0	8.0	4.0	3.0	5.41	108.48	PD080730	-
PD080732	PD080732	O=C(CNc1ncnc2ccc(C(F)(F)F)cc12)NC1CN([C@H]2CC[C@@](O)(c3ccccc3)CC2)C1	ZTHPXRKJHZNDEX-WBANQOEISA-N	CCR2	Homo sapiens									1										1								3.0	499.22	6.0	3.0	6.0	5.0	3.0	3.69	90.38	PD080733	-
PD080734	PD080734	Nc1ccc(-c2ccccc2)cc1NC(=O)c1ccc(N2CCC3(CC2)CNC(=O)O3)nc1	BJYDJXHEOGYQLF-UHFFFAOYSA-N	HDAC1	Homo sapiens									1										1		1						2.0	443.2	6.0	3.0	4.0	5.0	3.0	3.66	109.58	PD080734	-
PD080736	PD080736	Cn1cc(/C=C2\Oc3ccc(NC(=O)Nc4cccnc4)cc3C2=O)c2c(N3CC4CCC(C3)O4)ccnc21	MDCUBEVKJUZWIR-GATIEOLUSA-N	MTOR	Homo sapiens									1										1								2.0	522.2	8.0	2.0	4.0	7.0	4.0	4.6	110.61	PD080737	-
PD080738	PD080738	CS(=O)(=O)N1CCN(Cc2cc3nc(-c4ccc(NC(=O)Nc5ccncc5)cc4)nc(N4CC5CCC(C4)O5)c3s2)CC1	HMFRTKWUEKZJKW-UHFFFAOYSA-N	MTOR	Homo sapiens									1										1								2.0	634.21	10.0	2.0	7.0	7.0	4.0	3.84	132.89	PD080738	-
PD080740	PD080740	COc1ccc(Cn2nc(Nc3cc(C)[nH]n3)c3ccccc3c2=O)cc1	QHRVQKRZPPKELL-UHFFFAOYSA-N	AURKA	Homo sapiens									1										1								2.0	361.15	6.0	2.0	5.0	4.0	4.0	3.23	84.83	PD080740	-
PD080742	PD080742	CCCC(=O)NCC1(c2cn(C)c3ccc(OC)cc23)CC1	GIVWHZIVPDPHPL-UHFFFAOYSA-N	MTNR1B	Homo sapiens									1										1		1						2.0	300.18	3.0	1.0	6.0	3.0	2.0	3.13	43.26	PD080742	-
PD080744	PD080744	Oc1ccc(F)cc1-c1nc(N[C@H]2CCNC2)c2ccccc2n1	WPJHAIHBCDUZSC-LBPRGKRZSA-N	CHEK2	Homo sapiens									1										1								2.0	324.14	5.0	3.0	3.0	4.0	3.0	2.92	70.07	PD080745	-
PD080746	PD080746	C[C@@H](Oc1cc(-n2cnc3cc(-c4ccc[nH]4)ccc32)sc1C(N)=O)c1ccccc1C(F)(F)F	HWIAWKKIXLIVDB-CQSZACIVSA-N	PLK1	Homo sapiens									1										1								2.0	496.12	5.0	2.0	6.0	5.0	5.0	6.34	85.93	PD088615	-
PD080748	PD080748	OC[C@@H]1CCCN1CCOc1ccc([C@@H]2Oc3ccc(O)cc3S[C@@H]2c2ccc(O)cc2)cc1	CEFNIUUIIQIRMU-SQMFLSJESA-N	ESR1	Homo sapiens									1										1								2.0	479.18	7.0	3.0	7.0	5.0	3.0	4.9	82.39	PD080749	1
PD081353	PD081353	OC[C@H]1CCCN1CCOc1ccc([C@@H]2Oc3ccc(O)cc3S[C@@H]2c2ccc(O)cc2)cc1	CEFNIUUIIQIRMU-JAMKYWPSSA-N	ESR1	Homo sapiens									1										1								2.0	479.18	7.0	3.0	7.0	5.0	3.0	4.9	82.39	PD080749	1
PD080750	PD080750	CN(C)c1cccc(N2CCc3cc(O)ccc3C2(C)c2ccc(OCCN3CCCC3)cc2)c1	LRBZQKOFLDXLHL-UHFFFAOYSA-N	ESR1	Homo sapiens									1										1								2.0	471.29	5.0	1.0	7.0	5.0	3.0	5.26	39.18	PD080750	-
PD080752	PD080752	Cc1sc(-c2cccc(C(F)(F)F)c2)nc1CCOc1ccc2c(c1)CC[C@H]2CC(=O)O	YXVVWAPGKSBKPP-INIZCTEOSA-N	PPARG	Homo sapiens									1										1								2.0	461.13	4.0	1.0	7.0	4.0	3.0	6.26	59.42	PD080753	-
PD080754	PD080754	CNc1nc2sc(S(C)(=O)=O)nc2c2c1ncn2C	CUFUQFXOHLGNNW-UHFFFAOYSA-N	IKBKB	Homo sapiens									1										1								2.0	297.04	8.0	1.0	2.0	3.0	3.0	1.02	89.77	PD080754	-
PD080756	PD080756	Cc1cc(C)cc(C(=O)N2CC[C@H](NCc3ccnc4ccccc34)C[C@H]2Cc2ccccc2)c1	WQZUOBIIPDZRJP-WUFINQPMSA-N	TACR1	Homo sapiens									1										1								3.0	463.26	3.0	1.0	6.0	5.0	4.0	5.86	45.23	PD067984	-
PD080757	PD080757	Cc1c(-c2ccc(O)cc2)n(CCCCn2c(-c3ccc(O)cc3)c(C)c3cc(O)ccc32)c2ccc(O)cc12	JHABLDGSUDJNGT-UHFFFAOYSA-N	ESR2	Homo sapiens									1										1								2.0	532.24	6.0	4.0	7.0	6.0	6.0	7.85	90.78	PD080757	-
PD080759	PD080759	CSc1nc(Nc2cccc(Cl)c2)c2cnn(CCc3ccccc3)c2n1	YQKKZNSKOPPFHY-UHFFFAOYSA-N	SRC	Homo sapiens									1										1								3.0	395.1	6.0	1.0	6.0	4.0	4.0	5.19	55.63	PD080759	-
PD080763	PD080763	N=C(N)c1ccc(Oc2cc(Oc3ccc(C(=N)N)cc3)cc(C(=O)O[C@H]3CC[C@H](N)CC3)c2)cc1	JVWTZUKPDMRNDC-XYWHTSSQSA-N	ST14	Homo sapiens									1										1								5.0	487.22	7.0	5.0	8.0	4.0	3.0	4.27	170.52	PD080764	-
PD080765	PD080765	COc1ccc2cc(-c3cccnc3)ccc2c1Cl	BMTHOHYTXCPKJC-UHFFFAOYSA-N	CYP11B2	Homo sapiens									1										1		1						3.0	269.06	2.0	0.0	2.0	3.0	3.0	4.56	22.12	PD080765	-
PD080767	PD080767	Cc1ccccc1OS(=O)(=O)C1CC2OC1C(c1ccc(NC(=O)CCCCCCC(=O)O)cc1)=C2c1ccc(O)cc1	NIQGUVXUIJDHKR-UHFFFAOYSA-N	HDAC1	Homo sapiens									1										1								4.0	605.21	7.0	3.0	13.0	5.0	3.0	5.92	139.23	PD080767	-
PD080769	PD080769	Nc1ccc(-c2ccccc2)cc1NC(=O)c1ccc(CN2CCC3(CCCN3)CC2)cc1	LZBKXQAVFZXXKI-UHFFFAOYSA-N	HDAC1	Homo sapiens									1										1		1						2.0	440.26	4.0	3.0	5.0	5.0	3.0	4.91	70.39	PD080769	-
PD080771	PD080771	CCC(=O)N[C@H]1C[C@@H](n2cnc3c(NC(CC)CC)nc(NCCc4cn(CC)cn4)nc32)[C@H](O)[C@@H]1O	BHLNXDOZTJNVFB-KKXYHZGYSA-N	ADORA2A	Homo sapiens									1										1		1						2.0	513.32	11.0	5.0	12.0	4.0	3.0	1.86	155.04	PD088616	-
PD080773	PD080773	COc1cccc(S(=O)(=O)N2Cc3ccc(/C=C/C(=O)NO)cc3C2)c1	WACRVUWXFHUOIE-SOFGYWHQSA-N	HDAC1	Homo sapiens									1										1								1.0	374.09	5.0	2.0	5.0	3.0	2.0	1.92	95.94	PD080774	-
PD080775	PD080775	CC(C)C[C@H](N[C@@H](c1ccc(-c2ccc(C#N)cc2)cc1)C(F)(F)F)C(=O)NCC#N	HDTFLVIWSNGBAC-SFTDATJTSA-N	CTSK	Homo sapiens									1										1								4.0	428.18	4.0	2.0	8.0	2.0	2.0	4.47	88.71	PD080776	-
PD080777	PD080777	CC(=O)N[C@@H](Cc1cc(F)cc(F)c1)[C@H](O)CN[C@@]1(c2cccc(C(C)(C)C)c2)CC[C@H](NO)NC1	TYBWKRPHNREMTD-SFIUMABJSA-N	BACE1	Homo sapiens									1										1								2.0	504.29	6.0	6.0	9.0	3.0	2.0	2.84	105.65	PD080778	-
PD080779	PD080779	CS(=O)(=O)N1CCC(Cc2cc3c(N4CCOCC4)nc(-c4cnc(N)nc4)nc3s2)CC1	YPCRAWCMULBAMO-UHFFFAOYSA-N	PIK3CA	Homo sapiens									1										1								2.0	489.16	10.0	1.0	5.0	5.0	3.0	1.78	127.43	PD080779	-
PD080781	PD080781	O=c1[nH]nc2cc(CO)c3ccc(-c4ccc[nH]4)cc3n12	FEKDFTQZRBQDGS-UHFFFAOYSA-N	CHEK1	Homo sapiens									1										1								4.0	280.1	4.0	3.0	2.0	4.0	4.0	1.66	86.18	PD080781	-
PD080783	PD080783	O=C1c2c(c3c4ccc(O)cc4n([C@@H]4O[C@@H](C(O)CO)[C@@H](O)[C@H]4O)c3c3[nH]c4cc(O)ccc4c23)C(=O)N1NC(CO)CO	LRIMDSSLDRGSMF-WZEFZNGUSA-N	TOP1	Homo sapiens									1										1								1.0	608.18	13.0	10.0	7.0	7.0	5.0	-0.73	241.2	PD080784	1
PD083919	PD083919	O=C1c2c(c3c4ccc(O)cc4n([C@@H]4O[C@H](C(O)CO)[C@@H](O)[C@H]4O)c3c3[nH]c4cc(O)ccc4c23)C(=O)N1NC(CO)CO	LRIMDSSLDRGSMF-XBSFZUPFSA-N	TOP1	Homo sapiens									1										1								1.0	608.18	13.0	10.0	7.0	7.0	5.0	-0.73	241.2	PD080784	1
PD080785	PD080785	CCn1c(=O)c(-c2cc(C(=O)NC3CC3)ccc2C)cc2cnn(-c3ccc(F)cc3F)c21	ONVFZPXWBQZKQL-UHFFFAOYSA-N	MAPK14	Homo sapiens									1										1								2.0	448.17	5.0	1.0	5.0	5.0	4.0	4.35	68.92	PD080785	-
PD080787	PD080787	CN(Cc1nc2c(N3CCOCC3)nc(-c3ccc(S(C)(=O)=O)cc3)nc2n1C)c1ncc(C(=O)NO)cn1	MEVLDKCVPRQTFM-UHFFFAOYSA-N	HDAC1	Homo sapiens									1										1								1.0	553.19	13.0	2.0	7.0	5.0	4.0	0.82	168.56	PD080787	-
PD080789	PD080789	CNCc1cncc(-c2cnc3[nH]nc(-c4nc5c(COC)cccc5[nH]4)c3c2)c1	WLIGHAXZSXWZCO-UHFFFAOYSA-N	CDK1	Homo sapiens									1										1								3.0	399.18	6.0	3.0	6.0	5.0	5.0	3.43	104.4	PD080789	-
PD080791	PD080791	CN1CCN(c2ccc(Nc3ncc4nc(Nc5ccccc5)n(C5CC5)c4n3)cc2)CC1	WABPITVYBFPGOY-UHFFFAOYSA-N	EGFR	Homo sapiens									1										1								1.0	440.24	8.0	2.0	6.0	6.0	4.0	4.4	74.14	PD080791	-
PD080793	PD080793	C[C@H]1C[C@H](C)OC2(CCC3=Cc4c(cnn4-c4ccc(F)cc4)C[C@@]32C)O1	AMCBONFIXAFCBY-GXZWQRSESA-N	NR3C1	Homo sapiens									1										1								1.0	368.19	4.0	0.0	1.0	5.0	2.0	4.66	36.28	PD080794	-
PD080795	PD080795	CC1=CC2Cc3nc4cc(Cl)ccc4c(NCCCCCCCCNc4c5c(nc6cc(Cl)ccc46)CCCC5)c3C(C1)C2	JVAZMJIFYNHUQW-UHFFFAOYSA-N	ACHE	Homo sapiens									1										1								0.0	626.29	4.0	2.0	11.0	7.0	4.0	10.83	49.84	PD080795	-
PD080797	PD080797	CCCC(=O)NCC(C)(C)c1cn(C)c2ccc(OC)cc12	NZWXLQGBITVFAR-UHFFFAOYSA-N	MTNR1B	Homo sapiens									1										1		1						2.0	302.2	3.0	1.0	6.0	2.0	2.0	3.38	43.26	PD080797	-
PD080799	PD080799	COc1ccc(-c2ccn3ncc(/C=N/N(C)S(=O)(=O)c4cc([N+](=O)[O-])ccc4C)c3n2)cc1OC	UCRFEDKYGLHWFM-ZMOGYAJESA-N	FLT3	Homo sapiens									1										1								2.0	510.13	10.0	0.0	8.0	4.0	4.0	3.28	141.53	PD080800	-
PD080801	PD080801	Cc1[nH]c(/C=C2\C(=O)Nc3cc(NC(=O)Nc4ccccc4)ccc32)c(C)c1C(=O)O	XBBZAHDOGBGKGM-BOPFTXTBSA-N	FLT3	Homo sapiens									1										1								4.0	416.15	3.0	5.0	4.0	4.0	3.0	4.47	123.32	PD080802	-
PD080803	PD080803	CC(C)C[C@H](N[C@@H](c1ccc(-c2cccc(F)c2)cc1)C(F)(F)F)C(=O)NCC#N	CIUWURDWXWNZCC-PMACEKPBSA-N	CTSK	Homo sapiens									1										1								4.0	421.18	3.0	2.0	8.0	2.0	2.0	4.74	64.92	PD080804	-
PD080805	PD080805	COc1cncc(-c2cnc(C(C)(C)N3CCN(C[C@@H](O)C[C@@H](Cc4ccccc4)C(=O)N[C@H]4c5ccccc5OC[C@H]4O)[C@H](C(=O)NCC(F)(F)F)C3)o2)c1	CWAPFPHVCGEYRK-YKTJUOTHSA-N	CYP3A4	Homo sapiens									1										1								4.0	780.35	11.0	4.0	14.0	6.0	4.0	3.87	162.52	PD080806	-
PD080807	PD080807	O=C(O)CC(c1ccc2c(c1)OCO2)N1CCc2cc(Oc3cccc4c3nc3n4CCCN3)ccc2C1=O	MLCFOKYQRPBDTP-UHFFFAOYSA-N	ITGAV	Homo sapiens									1										1								3.0	526.19	8.0	2.0	6.0	7.0	4.0	4.59	115.15	PD080807	-
PD080809	PD080809	CN1CCN(c2ccc(C(=O)Nc3cc(-c4ccc(CNC(=O)OCc5cccnc5)cc4)n[nH]3)cc2)CC1	UYKQCKLULNMAQI-UHFFFAOYSA-N	FLT3	Homo sapiens									1										1								3.0	525.25	7.0	3.0	8.0	5.0	4.0	3.9	115.48	PD080809	-
PD080811	PD080811	CCOc1cc2ncc(C#N)c(Nc3ccc(OCC4CCCCC4)c(Cl)c3)c2cc1NC(=O)/C=C/CN(C)C	IITZAVGTWUTYHX-DHZHZOJOSA-N	ERBB2	Homo sapiens									1										1				1				2.0	561.25	7.0	2.0	11.0	4.0	3.0	6.92	99.51	PD080812	-
PD080813	PD080813	O=C(CNc1cc(C(F)(F)F)nc2ccc(C(F)(F)F)cc12)NC1CN([C@H]2CC[C@@](O)(c3cncs3)CC2)C1	PCWCPRLYGHIJBK-QXONSOMPSA-N	CCR2	Homo sapiens									1										1								3.0	573.16	7.0	3.0	6.0	5.0	3.0	4.77	90.38	PD080814	-
PD080815	PD080815	Cc1ccc([N+](=O)[O-])cc1S(=O)(=O)N(C)CCc1cnn2ccc(Cl)nc12	TZRFJDYUNMZHNZ-UHFFFAOYSA-N	FLT3	Homo sapiens									1										1								3.0	409.06	7.0	0.0	6.0	3.0	3.0	2.46	110.71	PD080815	-
PD080817	PD080817	CCNC(=O)Nc1ccc(-c2nc(N3CC4CCC(C3)O4)c3cnn(CC)c3n2)cc1	DZCKHQBHPTXSEC-UHFFFAOYSA-N	MTOR	Homo sapiens									1										1		1						2.0	421.22	7.0	2.0	5.0	5.0	3.0	3.02	97.2	PD080817	-
PD080821	PD080821	CNc1ncc2cc(-c3cc(C(=O)Nc4cc(C(F)(F)F)ccc4N4CC(C)(C)C4=O)ccc3C)ccc2n1	OJMWPSHLUJUPDD-UHFFFAOYSA-N	LCK	Homo sapiens									1										1								4.0	533.2	5.0	2.0	5.0	5.0	4.0	6.29	87.22	PD080821	-
PD080823	PD080823	CC(C)c1nnc2ccc(-c3ocnc3-c3ccccc3)cn12	GGUWFBJTYKFSCP-UHFFFAOYSA-N	MAPK14	Homo sapiens									1										1								1.0	304.13	5.0	0.0	3.0	4.0	4.0	4.17	56.22	PD080823	-
PD080825	PD080825	CS(=O)(=O)Nc1ccc(-c2ccnc(Nc3ccc(CN4CCCCC4)cc3)n2)cc1	YATMAUBCVFJJHK-UHFFFAOYSA-N	JAK2	Homo sapiens									1										1								2.0	437.19	6.0	2.0	7.0	4.0	3.0	4.24	87.22	PD080825	-
PD080827	PD080827	O=C1Cc2cnc(Nc3ccc(O)cc3)nc2-c2ccccc2N1	UJPRBQDQQHDOGH-UHFFFAOYSA-N	KDR	Homo sapiens									1										1								1.0	318.11	5.0	3.0	2.0	4.0	3.0	3.09	87.14	PD080827	-
PD080829	PD080829	C#Cc1cccc(Nc2ncnc3cc(OCCOC(=O)c4ccccc4OC(C)=O)c(OCCOC)cc23)c1	ZYAMJDNOVLMHHQ-UHFFFAOYSA-N	EGFR	Homo sapiens									1										1								1.0	541.18	10.0	1.0	12.0	4.0	4.0	4.54	118.1	PD080829	-
PD080831	PD080831	CN1CCC(Oc2ccc(-c3n[nH]c4ccc(NC(=O)C(c5ccsc5)C5CCCC5)cc34)cc2)CC1	VKUZMCHROLFMPL-UHFFFAOYSA-N	TTK	Homo sapiens									1										1								2.0	514.24	5.0	2.0	7.0	6.0	4.0	6.68	70.25	PD080831	-
PD080833	PD080833	Cc1cc(-c2ccc(-c3cccc(O)c3)s2)ccc1O	ICDRVGLMFQWTDX-UHFFFAOYSA-N	HSD17B1	Homo sapiens									1										1								5.0	282.07	3.0	2.0	2.0	3.0	3.0	4.8	40.46	PD080833	-
PD080835	PD080835	Cc1ccc(Oc2ccc(Nc3ncnc4cccc(O[C@H](C)C(=O)N(C)C)c34)cc2C)cn1	XNXUDGXKTVZKLB-GOSISDBHSA-N	ERBB2	Homo sapiens									1										1		1						3.0	457.21	7.0	1.0	7.0	4.0	4.0	5.03	89.47	PD080836	-
PD080837	PD080837	CCNC(=O)Nc1ccc(-c2nc(N3CC4CCC(C3)O4)c3cnn(CCN(C)C)c3n2)cc1	CVMBXWIKSOMGQU-UHFFFAOYSA-N	MTOR	Homo sapiens									1										1		1						2.0	464.26	8.0	2.0	7.0	5.0	3.0	2.56	100.44	PD080837	-
PD080839	PD080839	O=C(NCCO)Nc1ccc(-c2nc(N3CCOCC3)c3cnn(C4CCN(Cc5ccccc5)CC4)c3n2)cc1	ZZCOJCXQAHQFAH-UHFFFAOYSA-N	MTOR	Homo sapiens									1										1		1						2.0	556.29	9.0	3.0	8.0	6.0	4.0	3.28	120.67	PD080839	-
PD080841	PD080841	COCc1ccsc1/C=C1\Oc2ccc(O)c(OC)c2-c2ccc3c(c21)C(C)=CC(C)(C)N3	UZNBZDTUBTWOBU-MTJSOVHGSA-N	NR3C1	Homo sapiens									1										1		1						4.0	461.17	6.0	2.0	4.0	5.0	3.0	6.77	59.95	PD093500	-
PD080843	PD080843	CCNC(=O)Nc1ccc(-c2nc(N3CC4CCC(C3)O4)c3cnn(C4CCC5(CC4)OCCO5)c3n2)cc1	YCAGJYZYGLPLRL-UHFFFAOYSA-N	MTOR	Homo sapiens									1										1								2.0	533.28	9.0	2.0	5.0	7.0	3.0	3.86	115.66	PD080843	-
PD080845	PD080845	Oc1ccc([C@H]2Sc3cc(O)ccc3O[C@H]2c2ccc(OCCN3CC[C@@H](F)C3)cc2)cc1	SZCIUMNCRFCHKW-JSRBVGTNSA-N	ESR1	Homo sapiens									1										1								2.0	467.16	6.0	2.0	6.0	5.0	3.0	5.49	62.16	PD080846	-
PD080847	PD080847	CN1C[C@@H]2C[C@H]1CN2c1cc(F)c(-c2ccnc3c(-c4cccc5[nH]ncc45)c(-c4ccncc4)nn23)c(F)c1	JCJSAFZMXVQVBR-PMACEKPBSA-N	BRAF	Homo sapiens									1										1								10.0	534.21	7.0	1.0	4.0	8.0	6.0	5.17	78.24	PD080848	-
PD080849	PD080849	CCn1cc(-c2ccnc3[nH]c(-c4ccc(CN5CCCC5)cc4)cc23)c(-c2ccc(NC(=O)N(C)C)cc2)n1	YXVZSMQKDLURNT-UHFFFAOYSA-N	AURKB	Homo sapiens									1										1								2.0	533.29	5.0	2.0	7.0	6.0	5.0	6.47	82.08	PD080849	-
PD080851	PD080851	Cc1ccc(-c2ncc(OCC3CCNCC3)cc2-c2ccc(C#N)cc2)cc1	JQPWKVGXPWCDEE-UHFFFAOYSA-N	KDM1A	Homo sapiens									1										1								3.0	383.2	4.0	1.0	5.0	4.0	3.0	4.97	57.94	PD080851	-
PD080853	PD080853	Cc1ccn2ncc(/C=N/N(C)S(=O)(=O)c3cc([N+](=O)[O-])ccc3C)c2n1	QZIMFEZMFNJUKH-RQZCQDPDSA-N	FLT3	Homo sapiens									1										1								4.0	388.1	8.0	0.0	5.0	3.0	3.0	1.91	123.07	PD080854	-
PD080855	PD080855	CCOC(=O)C(=O)N(Cc1ccc(F)c(F)c1)c1ccc2c(c1)OC(C)(COc1ccc(C(=N)N)cc1)CN2C	QLNHOCKNFPMCPS-UHFFFAOYSA-N	F2	Homo sapiens									1										1								2.0	552.22	7.0	2.0	8.0	4.0	3.0	4.01	118.18	PD080855	-
PD080857	PD080857	C[C@H]([C@@H](c1ccc2cc(OCC(C)(C)C(=O)O)ccc2c1)n1ccnc1)N(C)C	YLMRCYCGLCIPMC-IERDGZPVSA-N	CYP26A1	Homo sapiens									1										1		1						2.0	395.22	5.0	1.0	8.0	3.0	3.0	4.07	67.59	PD083599	1
PD083599	PD083599	CC(C(c1ccc2cc(OCC(C)(C)C(=O)O)ccc2c1)n1ccnc1)N(C)C	YLMRCYCGLCIPMC-UHFFFAOYSA-N	CYP26A1	Homo sapiens									1										1								2.0	395.22	5.0	1.0	8.0	3.0	3.0	4.07	67.59	PD083599	1
PD080859	PD080859	Cn1cc(/C=C2\Oc3ccc(NC(=O)Nc4cccnc4)cc3C2=O)c2c(N3CCC(C(=O)N4CCOCC4)CC3)ccnc21	CWALREXCOSNFNO-QRQIAZFYSA-N	MTOR	Homo sapiens									1										1								2.0	607.25	9.0	2.0	5.0	7.0	4.0	4.3	130.92	PD080860	-
PD080861	PD080861	CN1CCN(c2ccc(OC(F)(F)F)c(Nc3nccc(-c4cc5c(n4CC(F)(F)F)CCNC5=O)n3)c2)CC1	WAQLLQUEYANORM-UHFFFAOYSA-N	PLK1	Homo sapiens									1										1							1	1.0	569.2	8.0	2.0	6.0	5.0	3.0	4.19	87.55	PD080861	-
PD080863	PD080863	CC(C)[C@H](NC(=O)c1ccc2[nH]nc(-c3ccc(N4C5CCC4COC5)cc3)c2c1)c1ccccc1Cl	KFENBNGSHOHELN-BSYJTBJZSA-N	TTK	Homo sapiens									1										1								3.0	514.21	4.0	2.0	6.0	6.0	4.0	6.38	70.25	PD080864	-
PD080865	PD080865	Cc1c2c(n3c1CCCN1CCC[C@@H]1CNc1cc-3ccc1C(N)=O)CC(C)(C)CC2=O	WQTXERXALASGRT-GOSISDBHSA-N	HSP90AA1	Homo sapiens									1										1								3.0	434.27	5.0	2.0	1.0	5.0	2.0	3.86	80.36	PD080866	-
PD080869	PD080869	CC(C)CC(C(=O)NCC#N)c1cccc(-c2ccc(-c3csc(N4CCNCC4)n3)cc2)c1	BJXUTJHNAOJFQL-UHFFFAOYSA-N	CTSK	Homo sapiens									1										1								4.0	473.22	6.0	2.0	8.0	4.0	3.0	4.66	81.05	PD080869	-
PD080871	PD080871	Cc1cc(OCc2ccc(F)cc2F)c(Br)c(=O)n1Cc1cccc(CN(C)C)c1	YKKDTWCJTMOIQU-UHFFFAOYSA-N	MAPK14	Homo sapiens									1										1								1.0	476.09	4.0	0.0	7.0	3.0	3.0	4.89	34.47	PD080871	-
PD080873	PD080873	N#CC1(NC(=O)[C@@H]2C[C@@H](S(=O)(=O)c3ccccc3Cl)CN2C(=O)C2CCCCC2)CC1	WXMASBJALYNWOI-AEFFLSMTSA-N	CTSS	Homo sapiens									1										1								3.0	463.13	5.0	1.0	5.0	4.0	1.0	2.84	107.34	PD080874	-
PD080875	PD080875	CCc1nc2c(C(F)(F)F)cccc2n1-c1cccc(Oc2cccc(S(C)(=O)=O)c2)c1	BUSFVFJRQBYHBW-UHFFFAOYSA-N	NR1H3	Homo sapiens									1										1								2.0	460.11	5.0	0.0	5.0	4.0	4.0	5.8	61.19	PD080875	-
PD080877	PD080877	Cn1cc(Nc2ncc(C(F)(F)F)c(Nc3ccccc3C(N)=O)n2)cn1	TWTUUCKVMANLPL-UHFFFAOYSA-N	AURKB	Homo sapiens									1										1								2.0	377.12	7.0	3.0	5.0	3.0	3.0	2.81	110.75	PD080877	-
PD080879	PD080879	CC(=O)Nc1cc(NC(C(=O)Nc2nc3c(C(F)(F)F)cc4[nH]ncc4c3s2)c2ccccc2)ccc1Cl	ZLPVQTFOPHTMQK-UHFFFAOYSA-N	GRK2	Homo sapiens									1										1		1						3.0	558.09	6.0	4.0	6.0	5.0	5.0	6.6	111.8	PD080879	-
PD080881	PD080881	O=[N+]([O-])c1ccc(SCCCc2ccccc2)c2nonc12	QDBUFXSPJYEOLJ-UHFFFAOYSA-N	GSTM2	Homo sapiens									1										1								2.0	315.07	6.0	0.0	6.0	3.0	3.0	3.86	82.06	PD080881	-
PD080883	PD080883	CN(C)C1CCN(C(=O)C2CCN(c3ccnc4c3c(/C=C3\Oc5ccc(NC(=O)Nc6cccnc6)cc5C3=O)cn4C)CC2)C1	IFLLAMPXDVHCSI-LQNQUEJISA-N	MTOR	Homo sapiens									1										1								1.0	634.3	9.0	2.0	6.0	7.0	4.0	4.61	124.93	PD080884	-
PD080885	PD080885	N[C@H](COc1cncc(-c2cc3c(-c4ccccc4)n[nH]c3cn2)c1)Cc1ccccc1	NEHWSPJUDZLKNN-NRFANRHFSA-N	AKT1	Homo sapiens									1										1								2.0	421.19	5.0	2.0	7.0	5.0	5.0	4.64	89.71	PD080886	-
PD080887	PD080887	O=C(N[C@H](Cc1ccc(Cl)cc1)C(=O)N1CCN(c2ccccc2CNCCc2cccs2)CC1)[C@H]1Cc2ccccc2CN1	JSSBJZNAQLSMID-CZNDPXEESA-N	MC4R	Homo sapiens									1										1		1						4.0	641.26	6.0	3.0	11.0	6.0	4.0	4.82	76.71	PD088618	-
PD080889	PD080889	CC(C)(C)n1cc(-c2ccnc3[nH]ccc23)c(-c2ccc(NC(=O)Nc3ccccc3)cc2)n1	WHYSRBRRFPMZRT-UHFFFAOYSA-N	AURKB	Homo sapiens									1										1								2.0	450.22	4.0	3.0	4.0	5.0	5.0	6.49	87.63	PD080889	-
PD080891	PD080891	CCC(C(=O)N[C@@H](CC(=O)O)C(=O)CSCc1ccccc1)n1ccnc(NCCCc2nc(C)no2)c1=O	KSIBLECLZAACGQ-XJDOXCRVSA-N	CASP3	Homo sapiens									1										1								3.0	556.21	11.0	3.0	16.0	3.0	3.0	2.39	169.31	PD080892	-
PD080893	PD080893	N#CC1(NC(=O)[C@@H]2C[C@@H](S(=O)(=O)c3ccccc3)C[C@H]2C(=O)N2CCC(O)CC2)CC1	URUISEODUFQHLN-GUDVDZBRSA-N	CTSS	Homo sapiens									1										1								3.0	445.17	6.0	2.0	5.0	4.0	1.0	1.01	127.57	PD080894	-
PD080895	PD080895	CCn1cc(-c2ccnc3[nH]c(-c4cccc(CN5CCOCC5)c4)cc23)c(-c2ccc(NC(=O)N(C)C)cc2)n1	CMWCUAWBNRSCEK-UHFFFAOYSA-N	AURKB	Homo sapiens									1										1								2.0	549.29	6.0	2.0	7.0	6.0	5.0	5.71	91.31	PD080895	-
PD080897	PD080897	ClC(Cn1ncc2c(NCc3ccccc3)nc(SCCN3CCOCC3)nc21)c1ccccc1	NBRVSSMSYRPVCE-UHFFFAOYSA-N	ABL1,BCR;ABL1	Homo sapiens									1										1								2.0	508.18	8.0	1.0	10.0	5.0	4.0	4.84	68.1	PD080897	-
PD080899	PD080899	C[C@H](CCc1ccc(O)cc1)NC(=O)Cc1c(-c2ccccc2)[nH]c2cc(OCCCN3CCCCC3)ccc12	XOFSATVVFHWQNG-RUZDIDTESA-N	ESR1	Homo sapiens									1										1								2.0	539.31	4.0	3.0	12.0	5.0	4.0	6.48	77.59	PD080900	-
PD080901	PD080901	OCc1ccc(-c2cc3ncnc(Nc4ccc(OCc5cccc(F)c5)c(Cl)c4)c3s2)o1	GYCAMAWPCOYTTF-UHFFFAOYSA-N	EGFR	Homo sapiens									1										1								2.0	481.07	7.0	2.0	7.0	5.0	5.0	6.56	80.41	PD080901	-
PD080903	PD080903	C#Cc1cccc(Nc2ncnc3cc(OCCOC(=O)C(C)c4ccc(CC(C)C)cc4)c(OCCOC)cc23)c1	AALSIMHTWOFTTB-UHFFFAOYSA-N	EGFR	Homo sapiens									1										1								2.0	567.27	8.0	1.0	14.0	4.0	4.0	6.3	91.8	PD080903	-
PD080905	PD080905	Cn1cc(/C=C2\Oc3ccc(NC(=O)Nc4cccnc4)cc3C2=O)c2c(N3CCC(C(=O)N4C5CCC4COC5)CC3)ccnc21	BXXXTYRVJWRSTE-MNDYBZJGSA-N	MTOR	Homo sapiens									1										1								2.0	633.27	9.0	2.0	5.0	8.0	4.0	4.83	130.92	PD080906	-
PD080907	PD080907	O=C1C[C@H](NC(=O)[C@@H]2CN(S(=O)(=O)c3ccccc3)C[C@@H]3CCCC[C@H](NC(=O)c4ccc5ccccc5c4)C(=O)N32)C(O)O1	RHMWMZJZYRGSKL-CNMHYUMTSA-N	CASP1	Homo sapiens									1										1								2.0	634.21	8.0	3.0	6.0	6.0	3.0	1.53	162.42	PD080908	-
PD080909	PD080909	CONC(=O)Nc1ccc(-c2nc(N3CCOCC3)c3cnn(C4CCN(Cc5cccnc5)CC4)c3n2)cc1	BWBYDAOVOQPPDO-UHFFFAOYSA-N	MTOR	Homo sapiens									1										1		1						2.0	543.27	10.0	2.0	7.0	6.0	4.0	3.24	122.56	PD080909	-
PD080911	PD080911	Oc1cccc([C@H]2Sc3cc(O)ccc3S[C@H]2c2ccc(OCCN3CCCCC3)cc2)c1	BBLGBSSQOMHADP-RRPNLBNLSA-N	ESR1	Homo sapiens									1										1								2.0	479.16	6.0	2.0	6.0	5.0	3.0	6.64	52.93	PD080912	-
PD080913	PD080913	Cc1c([C@H](C)NC(=O)Cc2c(-c3ccccc3)[nH]c3ccccc23)n(Cc2ccc(OCCN3CCCCC3)cc2)c2ccc(O)cc12	GEKOXTKXWRGFMQ-LJAQVGFWSA-N	ESR1	Homo sapiens									1										1								2.0	640.34	5.0	3.0	11.0	7.0	6.0	8.14	82.52	PD080914	-
PD080915	PD080915	Cc1nc2c(C(F)(F)F)cccc2n1-c1cccc(Oc2cc(F)cc(S(C)(=O)=O)c2)c1	SNVDXERLZQEYID-UHFFFAOYSA-N	NR1H3	Homo sapiens									1										1								2.0	464.08	5.0	0.0	4.0	4.0	4.0	5.69	61.19	PD080915	-
PD080917	PD080917	COc1cc(Nc2nc3cccc(-c4cccc5[nH]cnc45)c3o2)cc(OC)c1OC	ZWUCWBYYVLQXEP-UHFFFAOYSA-N	RPS6KA2	Homo sapiens									1										1		1						4.0	416.15	7.0	2.0	6.0	5.0	5.0	5.14	94.43	PD080917	-
PD080919	PD080919	Nc1ncnn2ccc(C(=O)Nc3cccc(CNC(=O)Nc4ccc(Cl)cc4)c3)c12	MGNAPJSCPJHUFP-UHFFFAOYSA-N	AURKB	Homo sapiens									1										1								2.0	435.12	6.0	4.0	5.0	4.0	4.0	3.54	126.44	PD080919	-
PD080921	PD080921	O=C(NCc1ccc(S(=O)(=O)C2CCN(C3CCOCC3)CC2)cc1)c1cc2cnccc2[nH]1	LAQHWPIUUQIIKZ-UHFFFAOYSA-N	NAMPT	Homo sapiens									1										1								2.0	482.2	6.0	2.0	6.0	5.0	3.0	2.91	104.39	PD080921	-
PD080923	PD080923	C[C@H](CO)CN1[C@H](C)Cc2c([nH]c3ccccc23)[C@H]1c1ccc(/C=C/C(=O)O)cc1	RMZIARSKKBFMKY-PFKWOUEDSA-N	ESR1	Homo sapiens									1										1								2.0	404.21	3.0	3.0	6.0	4.0	3.0	4.23	76.56	PD080924	-
PD080927	PD080927	CC(=O)Nc1cccc(-c2ccc3nc(-c4cccnc4N)n(-c4ccc(CC(=O)Nc5ccccc5)cc4)c3n2)c1	HELQJUWSTQCERT-UHFFFAOYSA-N	AKT2	Homo sapiens									1										1		1						3.0	553.22	7.0	3.0	7.0	6.0	6.0	5.87	127.82	PD080927	-
PD080929	PD080929	CC[C@H](NC)C(=O)N[C@@H]1C(=O)N2[C@H](CC[C@H]2C(=O)NC(c2ccccc2)c2ccccc2)CC[C@@H]1CCNCc1ccc(Cl)cc1	OTQBPUFJWXXQDR-MCWJOJKXSA-N	XIAP	Homo sapiens									1										1								1.0	643.33	5.0	4.0	13.0	5.0	3.0	4.98	102.57	PD080930	-
PD080931	PD080931	Cc1cc(Nc2ncc(Cl)c(Nc3ccccc3S(=O)(=O)C(C)C)n2)c(OC(C)C)cc1C1CCN(CC(N)=O)CC1	LMBKLNFIUZRASR-UHFFFAOYSA-N	ALK	Homo sapiens									1										1		1						2.0	614.24	9.0	3.0	11.0	4.0	3.0	5.56	139.54	PD080931	-
PD080933	PD080933	COc1ccc(Br)cc1CC(=O)N[C@H](C(=O)N[C@@H](CC(=O)O)C(=O)CSCc1ccccc1)C(C)C	VGTVMULINBNZTO-CPJSRVTESA-N	CASP3	Homo sapiens									1										1								4.0	578.11	6.0	3.0	14.0	2.0	2.0	3.6	121.8	PD080934	-
PD080935	PD080935	Cc1ncc(-c2nc(Nc3ccc(C(=O)NC4CCN(C)CC4)c(F)c3)ncc2F)n1C(C)C	SEKBBOWCTFTKRL-UHFFFAOYSA-N	CDK2	Homo sapiens									1										1								2.0	469.24	7.0	2.0	6.0	4.0	3.0	4.08	87.97	PD080935	-
PD080937	PD080937	Fc1cccc(COc2ccc(Nc3ncnc4cc(-c5ccco5)sc34)cc2Cl)c1	SSYMKGVXLKENJR-UHFFFAOYSA-N	EGFR	Homo sapiens									1										1								2.0	451.06	6.0	1.0	6.0	5.0	5.0	7.07	60.18	PD080937	-
PD080939	DIDEAZAFOLATE	Nc1nc(O)c2cc(CNc3ccc(C(=O)NC(CCC(=O)O)C(=O)O)cc3)ccc2n1	UQFCLENKCDVITL-UHFFFAOYSA-N	DHFR	Homo sapiens									1										1								4.0	439.15	8.0	6.0	9.0	3.0	3.0	1.58	187.76	PD080939	-
PD080941	PD080941	CC(C)C[C@@H](C(=O)NCC#N)c1cccc(-c2cccc(-c3csc(N4CCC(N(C)C)C4)n3)c2)c1	SZQZHZOCBPSZIO-FXDYGKIASA-N	CTSK	Homo sapiens									1										1								4.0	501.26	6.0	1.0	9.0	4.0	3.0	5.39	72.26	PD080942	-
PD080943	PD080943	CC[C@@H]1CO[C@H](C(=O)NC2CCCCC2)CN1c1cc(-c2ccc3c(N)n[nH]c3c2)nc(NC)n1	XXCHHDLPUJYVJU-UTKZUKDTSA-N	PDPK1	Homo sapiens									1										1		1						2.0	478.28	8.0	4.0	6.0	5.0	3.0	3.08	134.08	PD080944	-
PD080945	PD080945	Nc1ncccc1-c1nc2ccc(-c3ccccc3)nc2n1-c1ccc(CNC(=O)c2ccccc2)cc1	AOMCLUHHIWNPGC-UHFFFAOYSA-N	AKT2	Homo sapiens									1										1		1						3.0	496.2	6.0	2.0	6.0	6.0	6.0	5.66	98.72	PD080945	-
PD080947	PD080947	CCCC[C@H]1CN(Oc2cccc(C(F)(F)F)c2)C(=O)CN1Cc1cncn1Cc1ccc(C#N)cc1	RYQUTFHCUCTHFO-QHCPKHFHSA-N	FNTB	Homo sapiens									1										1								1.0	511.22	6.0	0.0	9.0	4.0	3.0	5.02	74.39	PD080948	-
PD080949	PD080949	COc1cc2ncc(C#N)c(Nc3ccc(NCc4cccnc4)c(Cl)c3)c2cc1NC(=O)/C=C/CN(C)C	FRQFIGQZHAECJO-FNORWQNLSA-N	EGFR	Homo sapiens									1										1				1				2.0	541.2	8.0	3.0	10.0	4.0	4.0	5.58	115.2	PD080950	-
PD080951	PD080951	CC(C)S(=O)(=O)c1ccccc1Nc1nc(Nc2cccc(NC(=O)CN3CCN(C)CC3)c2)ncc1Cl	CSMSPOIEMWPZLD-UHFFFAOYSA-N	ALK	Homo sapiens									1										1								2.0	557.2	9.0	3.0	9.0	4.0	3.0	3.99	119.56	PD080951	-
PD080953	PD080953	Cc1ccc(-c2cc(C(=O)N[C@H]3CCCNC3)c(NC(N)=O)s2)cc1	BKBOPZCRBCJLJD-ZDUSSCGKSA-N	CHEK1	Homo sapiens									1										1								2.0	358.15	4.0	4.0	4.0	3.0	2.0	2.7	96.25	PD088619	-
PD080955	PD080955	COc1cccc(Cn2nc(Nc3cc(C)[nH]n3)c3ccccc3c2=O)c1	JZXZMZSAVCZTFQ-UHFFFAOYSA-N	AURKA	Homo sapiens									1										1								2.0	361.15	6.0	2.0	5.0	4.0	4.0	3.23	84.83	PD080955	-
PD080957	PD080957	CCN(CCO)CCCOc1cc2ncnc(Nc3cc(CC(=O)Nc4cccc(F)c4)[nH]n3)c2cc1OC	HOHHMYNNRAVKQB-UHFFFAOYSA-N	AURKB	Homo sapiens									1										1		1						2.0	537.25	9.0	4.0	14.0	4.0	4.0	3.51	137.52	PD080957	-
PD080963	PD080963	COc1ccc(F)cc1C(C)(C)CC(O)(Cn1ccc(=O)c2ncccc21)C(F)(F)F	AKVKAFLTKMIROA-UHFFFAOYSA-N	NR3C1	Homo sapiens									1										1								2.0	438.16	5.0	1.0	6.0	3.0	3.0	4.21	64.35	PD080963	-
PD080965	PD080965	Cc1ccc(N2CCc3cc(O)ccc3C2(C)c2ccc(OCCN3CCCCC3)cc2)cc1	OEUOOFPMSZOWIR-UHFFFAOYSA-N	ESR1	Homo sapiens									1										1								2.0	456.28	4.0	1.0	6.0	5.0	3.0	5.89	35.94	PD080965	-
PD080967	PD080967	CC(C)(C)S(=O)(=O)C[C@H](C1CC1)N1C(=O)[C@@](C)(CC(=O)N2CC[C@H](C(=O)O)C2)C[C@H](c2cccc(Cl)c2)[C@H]1c1ccc(Cl)cc1	VZZITKBMNYFVPR-RHWDBWQKSA-N	MDM2	Homo sapiens									1										1								1.0	676.21	5.0	1.0	9.0	5.0	2.0	6.37	112.06	PD080968	1
PD084992	PD084992	CC(C)(C)S(=O)(=O)C[C@H](C1CC1)N1C(=O)[C@@](C)(CC(=O)N2CC[C@@H](C(=O)O)C2)C[C@H](c2cccc(Cl)c2)[C@H]1c1ccc(Cl)cc1	VZZITKBMNYFVPR-OQZRLNFTSA-N	MDM2	Homo sapiens									1										1								1.0	676.21	5.0	1.0	9.0	5.0	2.0	6.37	112.06	PD080968	1
PD080969	PD080969	Cn1cncc1C(N)(c1ccc(Cl)cc1)c1cc2c3c(c1)c(-c1cccc(Cl)c1)cc(=O)n3CC2	WJLNAPDUWBBQHL-UHFFFAOYSA-N	FNTB	Homo sapiens									1										1								2.0	500.12	5.0	1.0	4.0	6.0	5.0	5.52	65.84	PD080969	-
PD080971	PD080971	NC(=O)c1c(Nc2ccc(I)cc2F)cc(F)cc1Oc1ccc(F)c(NS(N)(=O)=O)c1	ZCFABNOAWPFFLB-UHFFFAOYSA-N	MAP2K1	Homo sapiens									1										1								2.0	577.97	5.0	4.0	7.0	3.0	3.0	3.96	136.54	PD080971	-
PD080973	PD080973	C/C(=C\c1ccc(C(=O)O)cc1)c1ccc(O)c(C23CC4CC(CC(C4)C2)C3)c1	FMXQRDBLCLYHLF-LZYBPNLTSA-N	RARG	Homo sapiens									1										1								3.0	388.2	2.0	2.0	4.0	6.0	2.0	6.12	57.53	PD080974	-
PD080975	PD080975	Cn1c(Nc2cccc(C(C)(C)C)c2)nc2cc(Oc3ccnc(-c4ncc(C(F)(F)F)[nH]4)c3)ccc21	SCUGTCMSRMQNNQ-UHFFFAOYSA-N	PDGFRB	Homo sapiens									1										1								7.0	506.2	6.0	2.0	5.0	5.0	5.0	7.21	80.65	PD080975	-
PD080977	PD080977	CC1=CC(=O)N(Nc2nc(-c3cccs3)nc3scc(C)c23)C1=O	OCWUTKMYDDZSPG-UHFFFAOYSA-N	FLT3	Homo sapiens									1										1								1.0	356.04	7.0	1.0	3.0	4.0	3.0	3.37	75.19	PD080977	-
PD080979	PD080979	CC(=O)Nc1ccc(-c2cnc(N)nc2-c2c[nH]c3c(Br)cccc23)cc1	OMYNTAVJGIMZEG-UHFFFAOYSA-N	CLK1	Homo sapiens									1										1								4.0	421.05	4.0	3.0	3.0	4.0	4.0	4.6	96.69	PD080979	-
PD080981	PD080981	CC[C@H](NC)C(=O)N[C@@H]1C(=O)N2[C@H](CC[C@H]2C(=O)NC(c2ccccc2)c2ccccc2)CC[C@@H]1CCNCc1cccc(F)c1	FVAULEYZZJJPQP-MCWJOJKXSA-N	XIAP	Homo sapiens									1										1								1.0	627.36	5.0	4.0	13.0	5.0	3.0	4.46	102.57	PD080982	-
PD080983	PD080983	Cc1ncc(-c2nc(Nc3ccc(N4CCN(C(=O)CO)CC4)cc3)ncc2F)n1C(C)C	IBQDZKBTVFJMSQ-UHFFFAOYSA-N	CDK2	Homo sapiens									1										1								2.0	453.23	8.0	2.0	6.0	4.0	3.0	2.75	99.41	PD080983	-
PD080985	PD080985	CS(=O)(=O)c1cc(-c2cccc(-c3ccnc4c(C(F)(F)F)cccc34)c2)c(F)cc1F	UWFHFVAFWATDDO-UHFFFAOYSA-N	NR1H3	Homo sapiens									1										1								2.0	463.07	3.0	0.0	3.0	4.0	4.0	6.27	47.03	PD080985	-
PD080987	PD080987	CC(C)Nc1noc2c(-c3ccc4c(N5CCOC[C@@H]5C)nncc4c3)c(Cl)ccc12	FLEVSYIGMCAFBK-AWEZNQCLSA-N	MAPK14	Homo sapiens									1										1								2.0	437.16	7.0	1.0	4.0	5.0	4.0	5.14	76.31	PD088623	-
PD080989	PD080989	N#CC1(NC(=O)[C@@H]2C[C@@H](S(=O)(=O)c3ccccc3)C[C@H]2C(=O)N2CCCCC2)CC1	WOFUQMRIEYYWDB-GUDVDZBRSA-N	CTSS	Homo sapiens									1										1								3.0	429.17	5.0	1.0	5.0	4.0	1.0	2.04	107.34	PD080990	-
PD080991	PD080991	COCc1cccc2[nH]c(-c3n[nH]c4ncc(-c5cncc6ccccc56)cc34)nc12	QKVCYCAAFKGTNA-UHFFFAOYSA-N	CDK1	Homo sapiens									1										1								3.0	406.15	5.0	2.0	4.0	6.0	6.0	4.86	92.37	PD080991	-
PD080993	PD080993	Cc1cccc(-n2cnc3cc(C(=O)N4CCCC(C)(C)C4)ccc32)c1	LZKKTPSYBZSUGJ-UHFFFAOYSA-N	HPGD	Homo sapiens									1										1								2.0	347.2	3.0	0.0	2.0	4.0	3.0	4.6	38.13	PD080993	-
PD080995	PD080995	Nc1noc2cccc(C(=O)Nc3cccc(CNC(=O)Nc4ccccc4)c3)c12	UFPZESBZRBQJGP-UHFFFAOYSA-N	AURKB	Homo sapiens									1										1								2.0	401.15	5.0	4.0	5.0	4.0	4.0	3.98	122.28	PD080995	-
PD080997	PD080997	CCCn1cc(S(=O)(=O)c2ccc(NC(=O)[C@@H]3C[C@H]3c3cccnc3)cc2)cn1	CBGMGQVEMRTNGL-VQTJNVASSA-N	NAMPT	Homo sapiens									1										1								3.0	410.14	6.0	1.0	7.0	4.0	3.0	3.26	93.95	PD080998	1
PD081398	PD081398	CCCn1cc(S(=O)(=O)c2ccc(NC(=O)[C@H]3C[C@@H]3c3cccnc3)cc2)cn1	CBGMGQVEMRTNGL-UXHICEINSA-N	NAMPT	Homo sapiens									1										1								3.0	410.14	6.0	1.0	7.0	4.0	3.0	3.26	93.95	PD080998	1
PD080999	PD080999	C#CN(Cc1ccc2nc(N)nc(O)c2c1)c1ccc(C(=O)NC(CCC(=O)O)C(=O)NC(CCC(=O)NC(CCC(=O)NC(CCC(=O)O)C(=O)O)C(=O)O)C(=O)O)cc1	KAYSCGYEDLPRGH-UHFFFAOYSA-N	TYMS	Homo sapiens									1										1								4.0	850.28	14.0	11.0	24.0	3.0	3.0	-0.39	378.17	PD080999	-
PD081001	PD081001	Nc1nc2[nH]c(CCCc3ccc(C(=O)N[C@@H](CCC(=O)O)C(=O)O)s3)cc2c(=O)[nH]1	WMBYSCVMFMNUQV-LBPRGKRZSA-N	GART	Homo sapiens									1										1								5.0	447.12	7.0	6.0	10.0	3.0	3.0	1.12	191.26	PD081002	-
PD081003	PD081003	O=C(N[C@H](Cc1ccc(Cl)cc1)C(=O)N1CCN(c2ccccc2CNCCc2cccs2)CC1)c1cccnc1	KCOGRZRTHYZEQU-GDLZYMKVSA-N	MC4R	Homo sapiens									1										1		1						3.0	587.21	6.0	2.0	11.0	5.0	4.0	4.82	77.57	PD081004	-
PD081005	PD081005	CC(C)n1nnc2c(N3CCOCC3)nc(-c3ccc(NC(=O)Nc4ccc(N(C)C)cc4)cc3)nc21	XPMHSWIMONQOGG-UHFFFAOYSA-N	MTOR	Homo sapiens									1										1								3.0	501.26	9.0	2.0	6.0	5.0	4.0	4.02	113.33	PD081005	-
PD081007	HUPRINE Y	CC1=CC2Cc3nc4cc(Cl)ccc4c(N)c3C(C1)C2	UKCBMHDZLYYTMI-UHFFFAOYSA-N	ACHE	Homo sapiens									1										1		1						3.0	284.11	2.0	1.0	0.0	4.0	2.0	4.47	38.91	PD081007	-
PD081009	PD081009	COc1cc2ncc(C#N)c(Nc3ccc(Sc4ncc(-c5ccccc5)s4)c(Cl)c3)c2cc1NC(=O)/C=C/CN(C)C	BXBBCTASDUZGMZ-JXMROGBWSA-N	EGFR	Homo sapiens									1										1				1				2.0	626.13	9.0	2.0	10.0	5.0	5.0	7.84	103.17	PD081010	-
PD081011	CURCUMIN PYRAZOLE	COc1cc(/C=C/c2cc(/C=C/c3ccc(O)c(OC)c3)[nH]n2)ccc1O	LKLASFRCXLTNMY-FCXRPNKRSA-N	ALOX5	Homo sapiens									1										1		1						10.0	364.14	5.0	3.0	6.0	3.0	3.0	4.18	87.6	PD081012	-
PD081013	PD081013	O=C(NCc1cccnc1)Nc1ccc(S(=O)(=O)N2CCCNCC2)cc1	OHPGWQUAVRKRCD-UHFFFAOYSA-N	NAMPT	Homo sapiens									1										1								1.0	389.15	5.0	3.0	5.0	3.0	2.0	1.39	103.43	PD081013	-
PD081015	PD081015	CC[C@@H](C)[C@H](C(=O)O)N1C[C@H](CN2CCC(c3cc(Cc4ccc(C#N)cc4)nn3CC)CC2)[C@@H](c2cccc(F)c2)C1	QXILTVSZVUBYFU-TWNSHOTESA-N	CCR5	Homo sapiens									1										1		1						1.0	585.35	6.0	1.0	11.0	5.0	3.0	5.9	85.39	PD081016	-
PD081017	PD081017	COc1ccc(Cl)c(Nc2ncnc3cc(OCCCN4CCN(C(C)=O)CC4)cc(OC(C)C)c23)n1	AQEIGFROUMAUCQ-UHFFFAOYSA-N	SRC	Homo sapiens									1										1		1						2.0	528.23	9.0	1.0	10.0	4.0	3.0	4.15	101.94	PD081017	-
PD081019	PD081019	COc1ccc2c(c1)[C@]1(C[C@H]1c1ccc3c(/C=C/c4ccc(CN(C)C)cc4)n[nH]c3c1)C(=O)N2	DKVKUPRCFKTRIY-IRIFPNPLSA-N	PLK4	Homo sapiens									1										1								7.0	464.22	4.0	2.0	6.0	6.0	4.0	5.18	70.25	PD081020	-
PD081021	PD081021	CC(=O)Nc1cnc2ccn(-c3cc(NC4CC4)n4ncc(C#N)c4n3)c2c1	SYFFUKLBOFFLLY-UHFFFAOYSA-N	HIPK2	Homo sapiens									1										1								2.0	372.14	8.0	2.0	4.0	5.0	4.0	2.47	112.93	PD081021	-
PD081023	PD081023	Cc1cc(Nc2ncc(Cl)c(Nc3ccccc3S(=O)(=O)C(C)C)n2)c(OC(C)C)cc1C1CCN(C(=O)CN(C)C)CC1	ADAQBVKANMBBGO-UHFFFAOYSA-N	ALK	Homo sapiens									1										1		1						3.0	642.28	9.0	2.0	11.0	4.0	3.0	6.16	116.76	PD081023	-
PD081025	PD081025	CCN1CCC(c2cc(OC(C)C)c(Nc3ncc(C)c(Nc4ccccc4S(=O)(=O)C(C)C)n3)cc2C)CC1	XQCYJMDRMXBJIP-UHFFFAOYSA-N	ALK	Homo sapiens									1										1		1						2.0	565.31	8.0	2.0	10.0	4.0	3.0	6.75	96.45	PD081025	-
PD081029	PD081029	O=C(NC(=O)c1ccccc1F)Nc1ccc2c(c1)NC(=O)/C2=C\c1ccc[nH]1	LNGFVQSWMPPJNE-YBEGLDIGSA-N	AURKB	Homo sapiens									1										1								1.0	390.11	3.0	4.0	3.0	4.0	3.0	3.61	103.09	PD081030	-
PD081031	PD081031	CCNC(=O)N1CCC2(CCN(c3ccc(C(=O)Nc4cc(-c5cccs5)ccc4N)cn3)CC2)C1	UZFJLATVXCCZGS-UHFFFAOYSA-N	HDAC1	Homo sapiens									1										1		1						2.0	504.23	6.0	3.0	5.0	5.0	3.0	4.67	103.59	PD081031	-
PD081033	PD081033	CC(C)(C)S(=O)(=O)C[C@H](C1CC1)N1C(=O)[C@@](C)(CS(N)(=O)=O)C[C@H](c2cccc(Cl)c2)[C@H]1c1ccc(Cl)cc1	OGTCBKWJBDPSAX-PAHOUZJPSA-N	MDM2	Homo sapiens									1										1								2.0	614.14	5.0	1.0	8.0	4.0	2.0	5.34	114.61	PD081034	-
PD081035	PD081035	O=C(NCCF)Nc1ccc(-c2nc(N3CCOCC3)c3cnn(CC(F)(F)F)c3n2)cc1	ZAEPCTWTCFBKRF-UHFFFAOYSA-N	MTOR	Homo sapiens									1										1		1						2.0	467.17	7.0	2.0	6.0	4.0	3.0	2.98	97.2	PD081035	-
PD081037	PD081037	CCC(=O)Nc1ccc(Sc2nc(Nc3cc(C)[nH]n3)cc(C3CC3)n2)cc1	AGHMFEHJWZVACU-UHFFFAOYSA-N	AURKA	Homo sapiens									1										1								2.0	394.16	6.0	3.0	7.0	4.0	3.0	4.63	95.59	PD081037	-
PD081039	PD081039	CCNC(=O)Nc1ccc(-c2nc(N3CCOC[C@@H]3CC)c3c(cnn3C)n2)cc1	DFFHBQFOKXDZFK-INIZCTEOSA-N	MTOR	Homo sapiens									1										1		1						2.0	409.22	7.0	2.0	5.0	4.0	3.0	2.79	97.2	PD081040	-
PD081041	PD081041	Cc1ccc2c(NC3CC3)noc2c1-c1ccc2c(N3CCOC[C@@H]3C)nncc2c1	BQZUAHKGFIUDFA-HNNXBMFYSA-N	MAPK14	Homo sapiens									1										1								2.0	415.2	7.0	1.0	4.0	6.0	4.0	4.55	76.31	PD088646	-
PD081043	PD081043	CCc1nc2cc(/C=C/C(=O)NO)ccc2c(=O)n1CCc1ccccc1	AULBTEVAVDTQLP-PKNBQFBNSA-N	HDAC6	Homo sapiens									1										1		1						6.0	363.16	5.0	2.0	6.0	3.0	3.0	2.72	84.22	PD081044	-
PD081045	PD081045	CCN(CC)CCNc1cc(Nc2cc(O)ccc2C)nc(-n2cnc3ccccc32)n1	OAILDJYOGMMAOQ-UHFFFAOYSA-N	LCK	Homo sapiens									1										1								3.0	431.24	8.0	3.0	9.0	4.0	4.0	4.33	91.13	PD081045	-
PD081047	PD081047	Cc1c(NS(N)(=O)=O)cccc1Oc1cc(F)cc(Nc2ccc(I)cc2F)c1C(N)=O	RGQQYUZZAVOEFH-UHFFFAOYSA-N	MAP2K1	Homo sapiens									1										1								2.0	574.0	5.0	4.0	7.0	3.0	3.0	4.13	136.54	PD081047	-
PD081049	PD081049	C#Cc1cc2c(cc1N1CCN(C3COC3)CC1)C(C)(C)c1[nH]c3cc(C#N)ccc3c1C2=O	OIYDABDXSYUHNK-UHFFFAOYSA-N	ALK	Homo sapiens									1										1								3.0	450.21	5.0	1.0	2.0	6.0	3.0	3.41	72.36	PD081049	-
PD081051	PD081051	O=c1c(O)ccccc1-c1ccc2ccccc2c1	ZAJVVUCLCLFUFW-UHFFFAOYSA-N	HDAC2	Homo sapiens									1										1								3.0	248.08	2.0	1.0	1.0	3.0	3.0	3.57	37.3	PD081051	-
PD081053	PD081053	CC#CCOc1ccc(S(=O)(=O)CC2(C(=O)NO)CCCN(C(=O)c3ccc(COCC)cc3)C2)cc1	OAXXNDPRBWJXOJ-UHFFFAOYSA-N	ADAM17	Homo sapiens									1										1								4.0	528.19	7.0	2.0	10.0	3.0	2.0	2.83	122.24	PD081053	-
PD081055	PD081055	O=C(Nc1ccc(-c2ccccc2)cc1)Nc1ccc2c(c1)NC(=O)/C2=C\c1ccc[nH]1	LDRYCDRIKRFDRD-HAHDFKILSA-N	FLT3	Homo sapiens									1										1								4.0	420.16	2.0	4.0	4.0	5.0	4.0	5.82	86.02	PD081056	-
PD081059	PD081059	O=[N+]([O-])c1ccc(SCC2CCCCC2)c2nonc12	OMZFQVHXSIWEMH-UHFFFAOYSA-N	GSTM2	Homo sapiens									1										1								2.0	293.08	6.0	0.0	4.0	3.0	2.0	3.8	82.06	PD081059	-
PD081061	PD081061	Cc1cc(-c2cnn3c(NCC4CCOCC4)nc(Nc4ccccc4F)nc23)ccc1C(=O)NC1CC1	IYIWFIKOGBBKHY-UHFFFAOYSA-N	TTK	Homo sapiens									1										1								2.0	515.24	8.0	3.0	8.0	6.0	4.0	4.71	105.47	PD081061	-
PD081063	PD081063	COc1cc(-c2ccnc(Nc3ccc(N4CCOCC4)cc3)n2)ccc1O	TVTOSNJQUDDNPC-UHFFFAOYSA-N	JAK2	Homo sapiens									1										1								2.0	378.17	7.0	2.0	5.0	4.0	3.0	3.44	79.74	PD081063	-
PD081065	PD081065	Cc1ncc(-c2nc(Nc3ccc(C(=O)N(C)C)c(F)c3)ncc2F)n1C(C)C	TYRDCYYKRYFRKP-UHFFFAOYSA-N	CDK2	Homo sapiens									1										1								2.0	400.18	6.0	1.0	5.0	3.0	3.0	3.95	75.94	PD081065	-
PD081067	PD081067	COc1ccc(-c2[nH]nc3ncnc(Nc4cccc(Cl)c4)c23)cc1	CNEAVADKWYPXBR-UHFFFAOYSA-N	EGFR	Homo sapiens									1										1		1						3.0	351.09	5.0	2.0	4.0	4.0	4.0	4.43	75.72	PD081067	-
PD081069	PD081069	C#Cc1cccc(Nc2ncnn3ccc(COC[C@@H]4CNCCO4)c23)c1	NRLAWORQYLUKAL-SFHVURJKSA-N	ERBB2	Homo sapiens									1										1								2.0	363.17	7.0	2.0	6.0	4.0	3.0	1.96	72.71	PD081070	-
PD081071	PD081071	COc1ccc(C(=O)NC(=O)Nc2cc3c(cc2F)/C(=C/c2[nH]c(C)c(C(=O)O)c2C)C(=O)N3)c(F)c1	ORAPIBKWDRGVHK-NVNXTCNLSA-N	AURKB	Homo sapiens									1										1								2.0	510.14	5.0	5.0	5.0	4.0	3.0	4.07	149.62	PD081072	-
PD081073	PD081073	Cc1ccc2oc(=O)c(CC(C)C(=O)NO)cc2c1	HNNDIXHHVAZLIV-UHFFFAOYSA-N	ADAM17	Homo sapiens									1										1								2.0	261.1	4.0	2.0	3.0	2.0	2.0	1.79	79.54	PD081073	-
PD081075	PD081075	CNC(=O)Nc1ccc(-c2nc(N3CCOCC3)c3cnn(C4CCN(Cc5cccnc5)CC4)c3n2)cc1	YWWSGKYAMVMIMB-UHFFFAOYSA-N	MTOR	Homo sapiens									1										1		1						4.0	527.28	9.0	2.0	6.0	6.0	4.0	3.31	113.33	PD081075	-
PD081077	PD081077	CS(=O)(=O)N(CCN1CCOCC1)c1ccc(Nc2ncc3cnn(C4CCCCCC4)c3n2)cc1	XFWNXRYYGPIPLI-UHFFFAOYSA-N	CYP2C9	Homo sapiens									1										1								5.0	513.25	9.0	1.0	8.0	5.0	3.0	3.56	105.48	PD081077	-
PD081081	PD081081	O=C(CN1CC=CC[C@H](NC(=O)c2ccc3ccccc3c2)C1=O)N[C@H]1CC(=O)OC1O	DXXBCUNHPRDBPM-JOHXPNBHSA-N	CASP1	Homo sapiens									1										1								2.0	437.16	6.0	3.0	5.0	4.0	2.0	0.48	125.04	PD081082	-
PD081083	PD081083	Oc1cccc([C@H]2Sc3cc(O)ccc3O[C@H]2c2ccc(OCCN3CCCC3)cc2)c1	CABPHYRAHPMSMC-IZZNHLLZSA-N	ESR1	Homo sapiens									1										1		1						2.0	449.17	6.0	2.0	6.0	5.0	3.0	5.54	62.16	PD081084	-
PD081085	PD081085	Nc1nsc2cccc(C(=O)Nc3cccc(CNC(=O)Nc4cccc(F)c4)c3)c12	ZQXHCYUUGYPWJB-UHFFFAOYSA-N	AURKB	Homo sapiens									1										1								3.0	435.12	5.0	4.0	5.0	4.0	4.0	4.59	109.14	PD081085	-
PD081087	PD081087	Cc1oc(-c2ccc(F)cc2)nc1CCOc1ccc2c(c1)CC[C@H]2CC(=O)O	VLQDGQDGXDVXMC-KRWDZBQOSA-N	PPARG	Homo sapiens									1										1								2.0	395.15	4.0	1.0	7.0	4.0	3.0	4.92	72.56	PD081088	-
PD081089	PD081089	CC(C)C[C@H](NC(=O)c1ccc(-c2cc(=O)c3cc([N+](=O)[O-])c(N[C@H](C)C4CCCCC4)cc3o2)cc1)C(N)=O	OYKRHXHJPJWNMX-KOSHJBKYSA-N	EEF1A2	Homo sapiens									1										1		1						2.0	548.26	7.0	3.0	10.0	4.0	3.0	5.38	157.57	PD081090	-
PD081091	PD081091	O=C(Nc1ccccc1)Nc1ccc(-c2nn(CCCO)cc2-c2ccnc3[nH]ccc23)cc1	GEUNWTZTVWNSTN-UHFFFAOYSA-N	AURKB	Homo sapiens									1										1								2.0	452.2	5.0	4.0	7.0	5.0	5.0	5.12	107.86	PD081091	-
PD081093	PD081093	CC(=O)Nc1ccc(NC(=O)c2cc(C(=O)Nc3cccc(C(F)(F)F)c3)ccc2C)cn1	CRVJWQKUGJBXHH-UHFFFAOYSA-N	KIT	Homo sapiens									1										1								3.0	456.14	4.0	3.0	5.0	3.0	3.0	4.87	100.19	PD081093	-
PD081095	PD081095	CCN1CCN(C(=O)NCc2ccc(C(=O)Nc3cc(-c4cccs4)ccc3N)cc2)C(=O)C1=O	JJDCMTCOALMMMX-UHFFFAOYSA-N	HDAC1	Homo sapiens									1										1								2.0	491.16	6.0	3.0	6.0	4.0	3.0	3.15	124.84	PD081095	-
PD081097	PD081097	COCCOc1cc2ncnc(Nc3c(Cl)ccc4c3OCO4)c2cc1NC(=O)[C@@H]1CCCN1	PXVOZEZXKFLOOY-HNNXBMFYSA-N	SRC	Homo sapiens									1										1								2.0	485.15	9.0	3.0	8.0	5.0	3.0	3.47	115.86	PD088624	-
PD081099	PD081099	Cc1cc(CN2CCN(c3c(Br)cnc4[nH]c(-c5ccc(N6CCOCC6)cc5)nc34)CC2)no1	QMNYBHANABNQLH-UHFFFAOYSA-N	AURKA	Homo sapiens									1										1								1.0	537.15	8.0	1.0	5.0	6.0	4.0	3.84	86.55	PD081099	-
PD081101	PD081101	CC(C)[C@H](NC[C@@H](N)CS)C(=O)N1Cc2ccccc2C[C@H]1C(=O)N[C@H](CCS(C)(=O)=O)C(=O)O	VBOYISMKUMBEJC-ZRNYENFQSA-N	FNTB	Homo sapiens									1										1								3.0	528.21	8.0	5.0	12.0	2.0	1.0	-0.18	158.9	PD081102	-
PD081103	PD081103	NS(=O)(=O)c1ccc(NSC(=S)N2CCOCC2)cc1	DKRVZNFSWMWIPT-UHFFFAOYSA-N	CA2	Homo sapiens									1										1								3.0	333.03	6.0	2.0	3.0	2.0	1.0	1.01	84.66	PD081103	-
PD081105	PD081105	O=c1[nH]ccc2c(Cc3nnc4ccc(-c5ccccc5)nn34)cccc12	UKMNXWVOVNJJBT-UHFFFAOYSA-N	MET	Homo sapiens									1										1								1.0	353.13	5.0	1.0	3.0	5.0	5.0	3.22	75.94	PD081105	-
PD081107	PD081107	COc1cccc2c1C(=O)c1c(O)c3c(c(O)c1C2=O)C[C@@](O)(C(C)=O)C[C@@H]3O[C@H]1C[C@H](NCc2ccc(-c3cn(CCCCCC(=O)NO)nn3)cc2)[C@H](O)[C@H](C)O1	HVOKYJBVRMOEJD-SHNXHHRMSA-N	HDAC2	Homo sapiens									1										1							1	4.0	813.32	16.0	7.0	14.0	7.0	4.0	3.18	251.89	PD081108	-
PD081109	PD081109	COc1ccc(C(C)=O)cc1CC(=O)N[C@H](C(=O)N[C@@H](CC(=O)O)C(=O)CSCc1ccccc1)C(C)C	RBCPNDRFXKBOQT-CUNXSJBXSA-N	CASP3	Homo sapiens									1										1								4.0	542.21	7.0	3.0	15.0	2.0	2.0	3.04	138.87	PD081110	-
PD081115	PD081115	Cc1cc(COC(=O)NCc2ccc(-c3cc(NC(=O)c4ccc(N5CCN(C)CC5)cc4)[nH]n3)cc2)no1	RRLMXJYNEGEVPP-UHFFFAOYSA-N	FLT3	Homo sapiens									1										1								3.0	529.24	8.0	3.0	8.0	5.0	4.0	3.8	128.62	PD081115	-
PD081117	PD081117	CN(C)CCn1ncc2c(N3CC4CCC(C3)O4)nc(-c3ccc(NC(=O)Nc4cccnc4)cc3)nc21	NIHHQWZEUOCDGK-UHFFFAOYSA-N	MTOR	Homo sapiens									1										1		1						2.0	513.26	9.0	2.0	7.0	6.0	4.0	3.46	113.33	PD081117	-
PD081119	PD081119	NCCC(=O)N[C@H](Cc1ccc(Cl)cc1)C(=O)N1CCN(c2ccccc2CNCCc2cccs2)CC1	GRAFEEBFOIOLGS-AREMUKBSSA-N	MC4R	Homo sapiens									1										1		1						4.0	553.23	6.0	3.0	12.0	4.0	3.0	3.46	90.7	PD081120	-
PD081121	PD081121	CCC[C@@H]([C@@H](CC1CCC(C)CC1)C(=O)N[C@@H](CCC/N=C(/N)NS(=O)(=O)c1ccccn1)C(=O)Nc1nccs1)N(O)C=O	QXSADLFWPARWTP-QSBPQZLJSA-N	ADAM17	Homo sapiens									1										1								4.0	664.28	10.0	5.0	17.0	3.0	2.0	2.88	209.07	PD081122	-
PD081123	PD081123	Cn1cc(/C=C2\Oc3cc(O)ccc3C2=O)c2c(-c3ccccc3)ccnc21	ZCVNAABGRHZZCS-JAIQZWGSSA-N	MTOR	Homo sapiens									1										1								2.0	368.12	5.0	1.0	2.0	5.0	4.0	4.56	64.35	PD081124	-
PD081125	PD081125	O=C1C(=O)c2cc([N+](=O)[O-])ccc2-c2ccccc21	KNAXWOBOCVVMST-UHFFFAOYSA-N	CES1	Homo sapiens									1										1							1	9.0	253.04	4.0	0.0	1.0	3.0	2.0	2.64	77.28	PD081125	-
PD081127	PD081127	CC(C)(C)c1nnc2ccc(-c3ocnc3-c3cc(F)c(F)cc3F)cn12	VNZJNPIWZYMGAO-UHFFFAOYSA-N	MAPK14	Homo sapiens									1										1								1.0	372.12	5.0	0.0	2.0	4.0	4.0	4.77	56.22	PD081127	-
PD081129	PD081129	Cc1sc(-c2ccc3c(c2)OCO3)nc1CCOc1ccc2c(c1)CC[C@H]2CC(=O)O	QTKSWOKSGQHQID-INIZCTEOSA-N	PPARG	Homo sapiens									1										1								2.0	437.13	6.0	1.0	7.0	5.0	3.0	4.97	77.88	PD081130	-
PD081131	PD081131	Clc1cccc(Nc2[nH]cnc3nc4c(c2-3)CCCC4)c1	SVXFOLMQBCUDSL-UHFFFAOYSA-N	EGFR	Homo sapiens									1										1		1						1.0	298.1	3.0	2.0	2.0	4.0	1.0	4.19	53.6	PD081131	-
PD081133	PD081133	O=C(CNc1ncnc2ccc(C(F)(F)F)cc12)NC1CN([C@H]2CC[C@@](O)(c3cncs3)CC2)C1	UVNOHJFVSYGPNY-CIEDQVTBSA-N	CCR2	Homo sapiens									1										1		1						2.0	506.17	8.0	3.0	6.0	5.0	3.0	3.15	103.27	PD081134	-
PD081135	PD081135	Cc1cc(OCP(=O)(O)O)cc(C)c1Cc1ccc(O)c(C(C)C)c1	SVXLLCKJKRYATC-UHFFFAOYSA-N	THRB	Homo sapiens									1										1		1						2.0	364.14	3.0	3.0	6.0	2.0	2.0	4.24	86.99	PD081135	-
PD081137	PD081137	Oc1ccc([C@H]2Sc3cc(O)ccc3O[C@H]2c2ccc(OCCN3C4CCC3CC4)cc2)cc1	AHZXOWRUYBWOSI-QZQYRZTLSA-N	ESR1	Homo sapiens									1										1								2.0	475.18	6.0	2.0	6.0	6.0	3.0	6.07	62.16	PD081138	-
PD081139	PD081139	CCNC(=O)Nc1ccc(-c2nn(CC)cc2-c2ccnc3[nH]c(-c4cccc(CN5CCOCC5)c4)cc23)cc1	RBJQAHIBEYFAAG-UHFFFAOYSA-N	AURKB	Homo sapiens									1										1								2.0	549.29	6.0	3.0	8.0	6.0	5.0	5.75	100.1	PD081139	-
PD081141	PD081141	Cc1cc(CN2CCC2)cnc1-c1ccc(C(=O)Nc2ccccc2N)cc1	YMHZFVXMJBMNAT-UHFFFAOYSA-N	HDAC1	Homo sapiens									1										1		1						1.0	372.2	4.0	2.0	5.0	4.0	3.0	4.1	71.25	PD081141	-
PD081143	PD081143	Cc1[nH]c2ccccc2c1CCN1CCc2ccc(/C=C/C(=O)NO)cc2C1	LZSBNYPDVQHPAO-VQHVLOKHSA-N	HDAC1	Homo sapiens									1										1		1						2.0	375.19	3.0	3.0	5.0	4.0	3.0	3.6	68.36	PD081144	-
PD081145	PD081145	CS(=O)(=O)c1ccc(-c2sc3cc(O)ccc3c2Oc2ccc(OCCN3CCCCC3)cc2)cc1	KUWSWTJKKAYVBV-UHFFFAOYSA-N	ESR1	Homo sapiens									1										1								2.0	523.15	7.0	1.0	8.0	5.0	4.0	6.33	76.07	PD081145	-
PD081147	PD081147	COC(Cn1ccc2c(N3CCOCC3)nc(-c3ccc(NC(=O)Nc4ccncc4)cc3)nc21)OC	WTSKLBVBUJRZSO-UHFFFAOYSA-N	MTOR	Homo sapiens									1										1								2.0	503.23	9.0	2.0	8.0	5.0	4.0	3.59	115.66	PD081147	-
PD081149	PD081149	CN[C@@H](C)C(=O)N[C@H]1CCC[C@H]2C[C@H]3CCN(CCc4ccc(Br)cc4)C[C@H]3N2C1=O	BCFKWSBDCRMWRK-ORDMVQLLSA-N	BIRC2	Homo sapiens									1										1								2.0	490.19	4.0	2.0	6.0	4.0	1.0	2.56	64.68	PD081150	-
PD081151	PD081151	COc1cc(NC(=O)[C@H](CCCCNS(N)(=O)=O)NC(=O)OCc2ccccc2)c2ncccc2c1	VBRYMHVURZBROJ-FQEVSTJZSA-N	HDAC6	Homo sapiens									1										1								2.0	515.18	7.0	4.0	12.0	3.0	3.0	2.44	161.74	PD088625	-
PD081153	PD081153	c1cn(-c2ccc3c(-c4cc5cc(CN6CCCCC6)ccc5[nH]4)n[nH]c3c2)nn1	AIDWTYRIDDCANO-UHFFFAOYSA-N	CHEK1	Homo sapiens									1										1								2.0	397.2	5.0	2.0	4.0	6.0	5.0	4.28	78.42	PD081153	-
PD081155	PD081155	O=C(CCCCCCNC(=O)Cn1cnc2c(Nc3ccccc3)nc(Nc3ccccc3)nc21)NO	QCJWJZWCXOMETA-UHFFFAOYSA-N	HDAC6	Homo sapiens									1										1		1						4.0	502.24	9.0	5.0	13.0	4.0	4.0	3.89	146.09	PD081155	-
PD081157	PD081157	CC(C)N1CCN(c2ccc(NC(=O)Nc3ccc(-c4nc(N5C6CCC5COC6)nc(N5CCOC[C@H]5C)n4)cc3)cc2)CC1	UTPMWUPXMZXWPP-URCVZGBWSA-N	MTOR	Homo sapiens									1										1								2.0	627.36	10.0	2.0	7.0	7.0	3.0	4.31	111.22	PD081158	-
PD081159	PD081159	CN(Cc1nc2c(N3CCOCC3)nc(-c3ccc(N)nc3)nc2n1C)c1ncc(C(=O)NO)cn1	RKBZIMVVOGYUSL-UHFFFAOYSA-N	HDAC1	Homo sapiens									1										1								1.0	491.21	13.0	3.0	6.0	5.0	4.0	0.39	173.33	PD081159	-
PD081161	PD081161	COc1ccc(Nc2ncc3c(n2)-c2ccccc2NC(=O)C3)cc1	NNGKQEUOVPXDNB-UHFFFAOYSA-N	KDR	Homo sapiens									1										1								3.0	332.13	5.0	2.0	3.0	4.0	3.0	3.39	76.14	PD081161	-
PD081163	PD081163	CN1CCN(c2ccc(NC(=O)Nc3ccc(-c4nc(C5=CCOCC5)nc(N5C6CCC5COC6)n4)cc3)cc2)CC1	NDLMLALBYLJOIH-UHFFFAOYSA-N	MTOR	Homo sapiens									1										1								2.0	582.31	9.0	2.0	6.0	7.0	3.0	4.11	107.98	PD081163	-
PD081165	PD081165	CCn1nc(Cc2ccccc2)cc1C1CCN(C[C@H]2CN([C@@H](C(=O)O)C(C)(C)C)C[C@@H]2c2cccc(F)c2)CC1	IIVZUBFHVGRROU-KUYURNMDSA-N	CCR5	Homo sapiens									1										1		1						2.0	560.35	5.0	1.0	9.0	5.0	3.0	6.03	61.6	PD088626	-
PD081167	PD081167	CC(C)S(=O)(=O)c1ccccc1Nc1nc(Nc2cccc(NC(=O)CN3CCN(C(=O)/C=C/CN(C)C)CC3)c2)ncc1Cl	FJSAYHJPHADVOT-MDWZMJQESA-N	ALK	Homo sapiens									1										1								2.0	654.25	10.0	3.0	12.0	4.0	3.0	4.0	139.87	PD081168	-
PD081169	PD081169	CCC(=O)Nc1cc(NC2(C(=O)Nc3nc4ccc5[nH]ncc5c4s3)CC2)ccc1F	LTDFDPHSEHTUCI-UHFFFAOYSA-N	GRK2	Homo sapiens									1										1		1						4.0	438.13	6.0	4.0	6.0	5.0	4.0	4.24	111.8	PD081169	-
PD081171	PD081171	O=C(Nc1ccc(-c2nc(C3CCOCC3)nc(N3C4CCC3COC4)n2)cc1)Nc1ccc(N2CCNCC2)cc1	NHZTZOWHFHJNQD-UHFFFAOYSA-N	MTOR	Homo sapiens									1										1								2.0	570.31	9.0	3.0	6.0	7.0	3.0	3.85	116.77	PD081171	-
PD081173	PD081173	COc1cc2c(Nc3cc(CC(=O)Nc4cccc(F)c4F)[nH]n3)ncnc2cc1OCCCN1CCC[C@H]1CO	KALSMXLQRKFVPO-SFHVURJKSA-N	AURKA	Homo sapiens									1										1								1.0	567.24	9.0	4.0	12.0	5.0	4.0	3.79	137.52	PD081174	1
PD084643	PD084643	COc1cc2c(Nc3cc(CC(=O)Nc4cccc(F)c4F)[nH]n3)ncnc2cc1OCCCN1CCC[C@@H]1CO	KALSMXLQRKFVPO-GOSISDBHSA-N	AURKB	Homo sapiens									1										1								2.0	567.24	9.0	4.0	12.0	5.0	4.0	3.79	137.52	PD081174	1
PD081175	PD081175	CCNCc1cncc(-c2cnc3[nH]nc(-c4nc5cc(OC)ccc5[nH]4)c3c2)c1	WNOFAMMMUOEJEM-UHFFFAOYSA-N	CDK1	Homo sapiens									1										1								3.0	399.18	6.0	3.0	6.0	5.0	5.0	3.68	104.4	PD081175	-
PD081177	PD081177	CS(=O)(=O)c1cccc(Oc2cccc(-n3c(C4CC4)nc4c(C(F)(F)F)cccc43)c2)c1	NYORNGSRUVZKGU-UHFFFAOYSA-N	NR1H3	Homo sapiens									1										1								2.0	472.11	5.0	0.0	5.0	5.0	4.0	6.12	61.19	PD081177	-
PD081179	PD081179	O=C(NCCCCN1CCN(c2cccc(Cl)c2Cl)CC1)c1ccc2c(c1)-c1ccccc1-2	JUXYQVLOCMVIJF-UHFFFAOYSA-N	DRD3	Homo sapiens									1										1		1						4.0	479.15	3.0	1.0	7.0	5.0	3.0	5.97	35.58	PD081179	-
PD081183	PD081183	O=C(N[C@H](c1ccccn1)C1CCCC1)c1ccc2[nH]nc(-c3ccc(N4C5CCCC4COC5)cc3)c2c1	RSRVBDNEVACROR-TVTFQUIASA-N	TTK	Homo sapiens									1										1								2.0	521.28	5.0	2.0	6.0	7.0	4.0	6.04	83.14	PD081184	-
PD081185	PD081185	CN(Cc1nc2c(N3CCOCC3)nc(-c3cnc4ccccc4c3)nc2n1C)c1ncc(C(=O)NO)cn1	FRPKYYIEENVXNJ-UHFFFAOYSA-N	HDAC1	Homo sapiens									1										1								1.0	526.22	12.0	2.0	6.0	6.0	5.0	1.96	147.31	PD081185	-
PD081187	PD081187	CN[C@@H](C)C(=O)N[C@H](C(=O)N[C@H]1C[C@@H]2CC[C@H]1N(CCc1ccccc1)C2)C1CCCCC1	GBQXNBCXOOCMBG-GILAWRQCSA-N	BIRC2	Homo sapiens									1										1		1						2.0	454.33	4.0	3.0	9.0	5.0	1.0	2.87	73.47	PD081188	-
PD081189	PD081189	CNC(=O)c1cc(Oc2ccc(NC(=O)Nc3ccc(OC(F)(F)F)cc3)cc2)ccn1	OUNLWXRDCKWIDY-UHFFFAOYSA-N	EPHX2	Homo sapiens									1										1								2.0	446.12	5.0	3.0	6.0	3.0	3.0	4.78	101.58	PD081189	-
PD081191	PD081191	C[C@@H](Sc1cc(-c2cnn(C3CCNCC3)c2)cnc1N)c1c(Cl)ccc(F)c1Cl	FERXSPCVEYOEDT-GFCCVEGCSA-N	MET	Homo sapiens									1										1								4.0	465.1	6.0	2.0	5.0	4.0	3.0	5.75	68.76	PD081192	-
PD081193	PD081193	CC[C@H](C)[C@H](C(=O)O)N1C[C@H](CN2CCC(c3cc(Cc4ccc(-c5ccccc5)cc4)nn3CC)CC2)[C@@H](c2cccc(F)c2)C1	CAGZIBHOJDZLGX-WUSDWFAZSA-N	CCR5	Homo sapiens									1										1		1						2.0	636.38	5.0	1.0	12.0	6.0	4.0	7.69	61.6	PD081194	-
PD081195	PD081195	CC(C)(C)OC(=O)Nc1cccc(-c2cc(C(=O)NCCCCC(=O)NO)no2)c1	HPDGNTVEPAKSPV-UHFFFAOYSA-N	HDAC6	Homo sapiens									1										1								6.0	418.19	7.0	4.0	8.0	2.0	2.0	3.09	142.79	PD081195	-
PD081197	PD081197	Cc1nc(NCCN(C)C)cc(Nc2cc(-c3cccc(NS(=O)(=O)c4ccccc4)c3)n[nH]2)n1	KGUQOJDXSGGMCR-UHFFFAOYSA-N	FLT3	Homo sapiens									1										1		1						1.0	492.21	8.0	4.0	10.0	4.0	4.0	3.69	127.93	PD081197	-
PD081199	PD081199	Cc1ccc(C(=O)NCCO)cc1-n1cnc(OCc2ccc(F)cc2F)c(Cl)c1=O	XIPYKUQAZQIESI-UHFFFAOYSA-N	MAPK14	Homo sapiens									1										1		1						2.0	449.1	6.0	2.0	7.0	3.0	3.0	2.77	93.45	PD081199	-
PD081201	PD081201	O=C(NOCCO)c1ccc2cnsc2c1Nc1ccc(I)cc1F	RWZBARRAYNKEQD-UHFFFAOYSA-N	MAP2K1	Homo sapiens									1										1		1						4.0	472.97	6.0	3.0	6.0	3.0	3.0	3.44	83.48	PD081201	-
PD081203	PD081203	Cc1oc(-c2ccc(C#N)cc2)nc1CCOc1ccc2c(c1)CC[C@H]2CC(=O)O	JXMLSYVXPHTKKM-IBGZPJMESA-N	PPARG	Homo sapiens									1										1								2.0	402.16	5.0	1.0	7.0	4.0	3.0	4.65	96.35	PD081204	-
PD081205	PD081205	Cc1ccc(-c2nc(N3CCOCC3)c3nc(CN(C)c4ncc(C(=O)NO)cn4)n(C)c3n2)cc1	CKXSDEMMIISHPY-UHFFFAOYSA-N	HDAC1	Homo sapiens									1										1		1						1.0	489.22	11.0	2.0	6.0	5.0	4.0	1.72	134.42	PD081205	-
PD081207	PD081207	CCNC(=O)N1CCC(C(=O)NO)(S(=O)(=O)c2ccc(OCc3cc(C)nc4ccccc34)cc2)CC1	XQTUJUSPSCMEOC-UHFFFAOYSA-N	ADAM17	Homo sapiens									1										1		1						3.0	526.19	7.0	3.0	7.0	4.0	3.0	2.97	137.93	PD081207	-
PD081209	PD081209	C[C@H]1CN(C2(C)CCN(C(=O)c3c(Cl)cncc3Cl)CC2)CCN1[C@@H](C)c1ccc(C(F)(F)F)cc1	CAZKDDQXONGRTE-ROUUACIJSA-N	CCR5	Homo sapiens									1										1		1						2.0	542.18	4.0	0.0	4.0	4.0	2.0	6.17	39.68	PD081210	-
PD081211	PD081211	CCOC(=O)N1CCC2(CC1)N=C(N)c1c(F)cccc1N2	FTNKTGJCALFVLR-UHFFFAOYSA-N	NOS2	Homo sapiens									1										1								3.0	306.15	5.0	2.0	1.0	3.0	1.0	1.91	79.95	PD081211	-
PD081213	PD081213	O=C(NC1CC1)c1ccc(Nc2nc(Nc3ccc(O)cc3)ncc2F)cc1	MOVLGZOUINJGGA-UHFFFAOYSA-N	AURKA	Homo sapiens									1										1								2.0	379.14	6.0	4.0	6.0	4.0	3.0	3.7	99.17	PD081213	-
PD081215	PD081215	Cc1cc(COc2ccc(S(=O)(=O)C3(C(=O)NO)CCNCC3)cc2)c2ccccc2n1	OVRNSWPIJUFVHN-UHFFFAOYSA-N	ADAM17	Homo sapiens									1										1		1						2.0	455.15	7.0	3.0	6.0	4.0	3.0	2.52	117.62	PD081215	-
PD081217	PD081217	Cn1cc(-c2ccc(N)c(NC(=O)c3ccc(N4CCC5(CCNC5)CC4)nc3)c2)cn1	XVCHNZHSYGQSJT-UHFFFAOYSA-N	HDAC1	Homo sapiens									1										1		1						2.0	431.24	7.0	3.0	4.0	5.0	3.0	2.9	101.1	PD081217	-
PD081219	PD081219	Cc1ccc2c(c1)[C@]1(C[C@H]1c1ccc3c(/C=C/c4ccc(CN5CCOCC5)cc4)n[nH]c3c1)C(=O)N2	AHXHWEURVLCQAX-MDTIIALHSA-N	PLK4	Homo sapiens									1										1								4.0	490.24	4.0	2.0	5.0	7.0	4.0	5.25	70.25	PD081220	-
PD081221	PD081221	O=C(N[C@H](c1ccccc1F)C1CC1)c1ccc2[nH]nc(-c3ccc(N4C5CCC4COC5)cc3)c2c1	AFPQNJFINOFINI-BSYJTBJZSA-N	TTK	Homo sapiens									1										1								2.0	496.23	4.0	2.0	6.0	7.0	4.0	5.62	70.25	PD081222	1
PD081765	PD081765	O=C(N[C@@H](c1ccccc1F)C1CC1)c1ccc2[nH]nc(-c3ccc(N4C5CCC4COC5)cc3)c2c1	AFPQNJFINOFINI-BTOOTBGFSA-N	TTK	Homo sapiens									1										1								3.0	496.23	4.0	2.0	6.0	7.0	4.0	5.62	70.25	PD081222	1
PD081223	PD081223	Cc1ccc(NC(=O)c2ccnc(N3CCCC3)c2)cc1-c1ccc2c(C3CCNCC3)noc2c1	DMTJDVSGJMJVRQ-UHFFFAOYSA-N	MAPK14	Homo sapiens									1										1								4.0	481.25	6.0	2.0	5.0	6.0	4.0	5.52	83.29	PD081223	-
PD081225	PD081225	N[C@H](COc1cncc(-c2ccc3[nH]ncc3c2)c1)Cc1c[nH]c2ccccc12	GQEPXNDANQTLHI-IBGZPJMESA-N	AKT1	Homo sapiens									1										1								2.0	383.17	4.0	3.0	6.0	5.0	5.0	4.06	92.61	PD088627	-
PD081227	PD081227	CC1CCN(S(=O)(=O)c2ccc(NC(=O)NCc3cccnc3)cc2)CCN1	BIFUICSRZIQHFK-UHFFFAOYSA-N	NAMPT	Homo sapiens									1										1								2.0	403.17	5.0	3.0	5.0	3.0	2.0	1.78	103.43	PD081227	-
PD081229	PD081229	CNc1nc2sc(-c3ccccc3)nc2c2c1ncn2C	RINVSNFRQRWTCD-UHFFFAOYSA-N	IKBKB	Homo sapiens									1										1								2.0	295.09	6.0	1.0	2.0	4.0	4.0	3.29	55.63	PD081229	-
PD081231	PD081231	CC(=O)Nc1ccc(-c2nc(N3CC4CCC(C3)O4)c3sccc3n2)cc1	MMVNGBAMDGGFQY-UHFFFAOYSA-N	MTOR	Homo sapiens									1										1								2.0	380.13	6.0	1.0	3.0	5.0	3.0	3.68	67.35	PD081231	-
PD081233	PD081233	CSc1nc(Nc2ccccc2)c2cnn(CC(C)c3ccccc3)c2n1	WFMZQMTTZLWZQG-UHFFFAOYSA-N	SRC	Homo sapiens									1										1								3.0	375.15	6.0	1.0	6.0	4.0	4.0	5.1	55.63	PD081233	-
PD081235	PD081235	CCNc1noc2c(-c3ccc4c(N5CCOC[C@@H]5C)nncc4c3)c(C)ccc12	KBVAYGZXOAZDKK-HNNXBMFYSA-N	MAPK14	Homo sapiens									1										1								2.0	403.2	7.0	1.0	4.0	5.0	4.0	4.4	76.31	PD088628	-
PD081237	PD081237	CCOc1cc2ncnc(Nc3ccc(OCc4cccc(F)c4)c(Cl)c3)c2cc1NC(=O)[C@H]1COC(=O)N1	QTDAKIJYNHGZGQ-JOCHJYFZSA-N	EGFR	Homo sapiens									1										1								2.0	551.14	8.0	3.0	9.0	5.0	4.0	5.19	123.7	PD081238	-
PD081241	PD081241	O=C(NCc1cccnc1)Nc1ccc(S(=O)(=O)N2CCC3(CCCN3)CC2)cc1	XPAAFTKNBOEGMR-UHFFFAOYSA-N	NAMPT	Homo sapiens									1										1								1.0	429.18	5.0	3.0	5.0	4.0	2.0	2.31	103.43	PD081241	-
PD081243	PD081243	CC[C@H](NC)C(=O)N[C@H](C(=O)N1C[C@@H]2Cc3cc(Cl)cc(Cl)c3N2C[C@H]1C(=O)N[C@@H]1CCOc2ccccc21)C1CCCCC1	KSALHYXGSMEPIV-MYEJIDBFSA-N	BIRC2	Homo sapiens									1										1								2.0	655.27	6.0	3.0	8.0	6.0	2.0	4.64	103.01	PD081244	-
PD081245	PD081245	COc1ccc(Cl)c(Nc2ncnc3cc(OCCCN4CCN(C)CC4)cc(OC(C)C)c23)n1	MPNHPBKFHQKFKA-UHFFFAOYSA-N	SRC	Homo sapiens									1										1		1						2.0	500.23	9.0	1.0	10.0	4.0	3.0	4.23	84.87	PD081245	-
PD081247	PD081247	CCS(=O)(=O)c1ccc(-c2sc3cc(O)ccc3c2Oc2ccc(OCCN3CCCCC3)cc2)cc1	QQOLSZOGLJIRPW-UHFFFAOYSA-N	ESR1	Homo sapiens									1										1								2.0	537.16	7.0	1.0	9.0	5.0	4.0	6.72	76.07	PD081247	-
PD081249	PD081249	C[C@@H](Oc1cc(-n2cnc3cc(-c4cnn(CCN5CCN(C)CC5)c4)ccc32)sc1C(N)=O)c1ccccc1Cl	NXOJBDCDDRAJDO-HXUWFJFHSA-N	PLK1	Homo sapiens									1										1								3.0	589.2	9.0	1.0	9.0	6.0	5.0	5.09	94.44	PD088629	-
PD081251	PD081251	CS(=O)(=O)N1C[C@@H]2CCCC[C@H](NC(=O)c3ccc4ccccc4c3)C(=O)N2[C@H](C(=O)N[C@H]2CC(=O)OC2O)C1	ASXOTWMUUUHDST-KVVKXRARSA-N	CASP1	Homo sapiens									1										1								2.0	572.19	8.0	3.0	5.0	5.0	2.0	0.1	162.42	PD081252	-
PD081253	PD081253	Cc1cc(Nc2ncc(Cl)c(Nc3ccccc3S(=O)(=O)C(C)C)n2)c(OC(C)C)cc1C1CCN(CC(=O)O)CC1	UWQCPRVJOPGITM-UHFFFAOYSA-N	ALK	Homo sapiens									1										1		1						2.0	615.23	9.0	3.0	11.0	4.0	3.0	6.16	133.75	PD081253	-
PD081255	PD081255	CN(Cc1cnc2nc(N)nc(N)c2n1)c1ccc(C(=O)NC(CCCN)C(=O)O)cc1	XZMFYMLGNMSYOG-UHFFFAOYSA-N	DHFR	Homo sapiens									1										1								2.0	439.21	10.0	5.0	9.0	3.0	3.0	0.14	199.26	PD081255	-
PD081257	PD081257	C[C@@H]1COCCN1c1nc(-c2ccc(NC(=O)Nc3ccc(OCCN(C)C)cc3)cc2)nc(N2C3CCC2COC3)n1	NUUSKGDTQXETAP-ZUOMXFFYSA-N	MTOR	Homo sapiens									1										1								2.0	588.32	10.0	2.0	9.0	6.0	3.0	3.72	117.21	PD081258	-
PD081259	PD081259	N#Cc1c(-c2ccccc2)cc(-c2ccccc2)nc1/N=c1\sc(C(=O)Nc2ccccc2)nn1-c1ccccc1	MSHUXGYAAIRFBT-FJSCPDHXSA-N	CHEK1	Homo sapiens									1										1								2.0	550.16	7.0	1.0	6.0	6.0	6.0	7.02	95.96	PD081260	-
PD081261	PD081261	CN(C)C(=O)c1ccc(-c2ccc3c(n2)Oc2ccccc2[C@H]3C(C)(C)C(=O)Nc2nncs2)cc1F	NFBRIOXZUUCQFQ-JOCHJYFZSA-N	NR3C1	Homo sapiens									1										1		1						2.0	517.16	7.0	1.0	5.0	5.0	4.0	5.34	97.31	PD081262	-
PD081263	PD081263	COc1ccc(-c2cc(O)c3cc(-c4cnco4)c(OC)cc3n2)cc1	FGTQDNVLKJQAMV-UHFFFAOYSA-N	IMPDH1	Homo sapiens									1										1								1.0	348.11	6.0	1.0	4.0	4.0	4.0	4.28	77.61	PD081263	-
PD081267	PD081267	O=C(/C=C/c1ccc(CN2CCCC(c3c[nH]c4ccccc34)C2)cc1)NO	ULWWEFQRNUGZPN-VAWYXSNFSA-N	HDAC1	Homo sapiens									1										1		1						2.0	375.19	3.0	3.0	5.0	4.0	3.0	4.07	68.36	PD081268	-
PD081269	PD081269	O=C1C[C@H](NC(=O)[C@@H]2CN(C(=O)Nc3ccccc3)C[C@@H]3CCCC[C@H](NC(=O)c4ccccc4)C(=O)N32)C(O)O1	IOVDCXCEGWOHSX-RUYZJNMWSA-N	CASP1	Homo sapiens									1										1								2.0	563.24	7.0	4.0	5.0	5.0	2.0	1.22	157.38	PD081270	-
PD081271	PD081271	CN(Cc1nc2c(N3CCOCC3)nc(Cl)nc2n1C)c1ncc(C(=O)NO)cn1	FLPNJGZGZRYFNK-UHFFFAOYSA-N	HDAC1	Homo sapiens									1										1		1						1.0	433.14	11.0	2.0	5.0	4.0	3.0	0.4	134.42	PD081271	-
PD081273	PD081273	CC(=O)C1=NN2c3cc(F)ccc3OC[C@H]2[C@@]1(CCCN1CCOCC1)c1ccccc1	QGNVIJKJOJRPFM-UKILVPOCSA-N	KIF11	Homo sapiens									1										1								2.0	437.21	6.0	0.0	6.0	5.0	2.0	3.4	54.37	PD081274	-
PD081275	PD081275	C=Cn1nc(C(N)=O)c2c1-c1nc(Nc3cc(N4CCN(C)CC4)ccc3OC(F)(F)F)ncc1CC2	IWNBRVJHAXKTLL-UHFFFAOYSA-N	PLK1	Homo sapiens									1										1							1	6.0	514.21	9.0	2.0	6.0	5.0	3.0	3.03	114.43	PD081275	-
PD081277	PD081277	O=C(Cc1cc[n+]([O-])cc1)N1CCN([C@H]2c3ccc(Cl)c(Br)c3CCc3cc(Br)cnc32)CC1	HRHHNNZCUHMMDC-VWLOTQADSA-N	FNTB	Homo sapiens									1										1								1.0	603.99	4.0	0.0	3.0	5.0	3.0	4.47	63.38	PD081278	-
PD081279	PD081279	CC#CCOc1ccc(S(=O)(=O)CC2(C(=O)NO)CCCN(C(=O)OCC)C2)cc1	PPNXUTAPILQZQN-UHFFFAOYSA-N	ADAM17	Homo sapiens									1										1								4.0	438.15	7.0	2.0	7.0	2.0	1.0	1.61	122.24	PD081279	-
PD081281	PD081281	O=C1Nc2ccccc2/C1=C\c1ccc2c(/C=C/c3ccccc3)n[nH]c2c1	YJKHNFBXHIHRMJ-WRMRRPGHSA-N	PLK4	Homo sapiens									1										1								1.0	363.14	2.0	2.0	3.0	5.0	4.0	5.23	57.78	PD081282	-
PD081283	PD081283	CC(C)N(CCCNC(=O)Nc1ccc(C(C)(C)C)cc1)C[C@H]1O[C@@H](n2cnc3c(NCc4ccccc4)ncnc32)[C@H](O)[C@@H]1O	CKMLVERJYCAQQK-DWCTZGTLSA-N	DOT1L	Homo sapiens									1										1								1.0	630.36	10.0	5.0	12.0	5.0	4.0	4.28	149.69	PD081284	-
PD081285	PD081285	CN1CCN(c2ccc(OC(F)(F)F)c(Nc3nccc(-c4cc(C(N)=O)cn4CC(F)(F)F)n3)c2)CC1	KZKAHLUAYFSINX-UHFFFAOYSA-N	PLK1	Homo sapiens									1										1							1	1.0	543.18	8.0	2.0	7.0	4.0	3.0	4.0	101.54	PD081285	-
PD081287	PD081287	NC(=O)c1cc(-c2ccncc2F)[nH]c1-c1ccccc1	XLUUSCJMKRYKDU-UHFFFAOYSA-N	CDC7	Homo sapiens									1										1								1.0	281.1	2.0	2.0	3.0	3.0	3.0	2.98	71.77	PD081287	-
PD081289	PD081289	CC[C@@H]1C(=O)N(C)c2cnc(Nc3ccc(C(=O)NC4CCN(C)CC4)c(OC)c3)nc2N1C1CCCC1	PTCKKLKSUNCGCE-JOCHJYFZSA-N	PLK1	Homo sapiens									1										1		1						2.0	521.31	8.0	2.0	7.0	5.0	2.0	3.56	102.93	PD081290	-
PD081291	PD081291	O=C(Nc1ncnc2oc(-c3cccnc3)cc12)C1CCCC1	ZSPPFDDJLOSQKQ-UHFFFAOYSA-N	GSK3B	Homo sapiens									1										1								2.0	308.13	5.0	1.0	3.0	4.0	3.0	3.41	80.91	PD081291	-
PD081293	PD081293	O=C1C[C@H](NC(=O)[C@@H]2COC[C@@H]3CCCC[C@H](NC(=O)c4ccc5ccccc5c4)C(=O)N32)C(O)O1	OEMJCZSXKAMRQI-OTUOPVNPSA-N	CASP1	Homo sapiens									1										1								2.0	495.2	7.0	3.0	4.0	5.0	2.0	0.86	134.27	PD081294	-
PD081295	PD081295	COc1ccc(-c2cccc(O)c(=O)c2)cc1	ONWOFQLLGGJDEH-UHFFFAOYSA-N	HDAC2	Homo sapiens									1										1								3.0	228.08	3.0	1.0	2.0	2.0	2.0	2.43	46.53	PD081295	-
PD081297	PD081297	COc1cc2c(Nc3ccc(Sc4nccn4C)c(Cl)c3)c(C#N)cnc2cc1OCCCN1CCCC1	YHAJJCOJWJKFSB-UHFFFAOYSA-N	MAP2K1	Homo sapiens									1										1								2.0	548.18	9.0	1.0	10.0	5.0	4.0	6.26	88.23	PD081297	-
PD081299	PD081299	C[C@H](C(=O)N[C@H]1CC(=O)OC1O)N1CC=CC[C@H](NC(=O)c2ccc3ccccc3c2)C1=O	CBORVVSGKICHTH-MMZZENOVSA-N	CASP1	Homo sapiens									1										1								2.0	451.17	6.0	3.0	5.0	4.0	2.0	0.87	125.04	PD081300	1
PD085221	PD085221	C[C@@H](C(=O)N[C@H]1CC(=O)OC1O)N1CC=CC[C@H](NC(=O)c2ccc3ccccc3c2)C1=O	CBORVVSGKICHTH-PKTPTRIFSA-N	CASP1	Homo sapiens									1										1								3.0	451.17	6.0	3.0	5.0	4.0	2.0	0.87	125.04	PD081300	1
PD081301	PD081301	NS(=O)(=O)c1ccc(NC(=O)Nc2ccc(/N=C3\C(=O)Nc4ccc(Cl)cc43)cc2)cc1	KNXOUOJRHUQSKV-UHFFFAOYSA-N	CA12	Homo sapiens									1										1								5.0	469.06	5.0	4.0	4.0	4.0	3.0	3.7	142.75	PD081301	-
PD081303	PD081303	CN1CCN(C(=O)c2ccc(-c3ccnc4c3c(/C=C3\Oc5cccc(O)c5C3=O)cn4C)cc2)CC1	HXANWSROTQADER-JLPGSUDCSA-N	MTOR	Homo sapiens									1										1								2.0	494.2	7.0	1.0	3.0	6.0	4.0	3.95	87.9	PD081304	-
PD081305	PD081305	Cc1cc(C(=O)N[C@H]2CC[C@@H](NC(=O)c3cc(F)cnc3Oc3cccc(-c4ccc(O)cc4CN4CCOCC4)c3)CC2)nn1C	HHMPSPSPFJQPAI-MKPDMIMOSA-N	PDE4B	Homo sapiens									1										1								5.0	642.3	9.0	3.0	9.0	6.0	4.0	4.73	130.84	PD081306	-
PD081307	PD081307	CN1CCC(c2ccc(OC(F)(F)F)c(Nc3ncc4c(n3)-c3c(c(C(N)=O)cn3C)CC4)c2)CC1	UPGSUYGNMGTTGT-UHFFFAOYSA-N	PLK1	Homo sapiens									1										1								1.0	500.21	7.0	2.0	5.0	5.0	3.0	4.13	98.3	PD081307	-
PD081309	PD081309	Clc1cccc(Nc2[nH]nc3ncnc(Nc4ccccc4)c23)c1	XCZCKVIRXXMKJC-UHFFFAOYSA-N	EGFR	Homo sapiens									1										1		1						5.0	336.09	5.0	3.0	4.0	4.0	4.0	4.49	78.52	PD081309	-
PD081311	PD081311	Cc1ccc(C(=O)NC2CC2)cc1-c1ccc2c(OC(C)C)nncc2c1	PRMZAUJLQXIACS-UHFFFAOYSA-N	MAPK14	Homo sapiens									1										1								5.0	361.18	4.0	1.0	5.0	4.0	3.0	4.28	64.11	PD081311	-
PD081313	PD081313	COC(=O)N1CCC(n2ncc3c(N4CCOCC4)nc(-c4ccc(NC(=O)OCCO)cc4)nc32)CC1	SLESJLZOADSRKF-UHFFFAOYSA-N	MTOR	Homo sapiens									1										1		1						2.0	525.23	11.0	2.0	6.0	5.0	3.0	2.27	144.17	PD081313	-
PD081315	PD081315	CN(C)C(=O)C1CCN(c2ccnc3c2c(/C=C2\Oc4ccc(NC(=O)Nc5cccnc5)cc4C2=O)cn3C)CC1	YJGFZFHIDUDCNH-YSMPRRRNSA-N	MTOR	Homo sapiens									1										1								2.0	565.24	8.0	2.0	5.0	6.0	4.0	4.53	121.69	PD081316	-
PD081317	PD081317	COCCNC(=O)c1cccc2cc(Oc3ccnc4cc(OC)ccc34)ccc12	AOSZKTUKGKSFAV-UHFFFAOYSA-N	KDR	Homo sapiens									1										1								4.0	402.16	5.0	1.0	7.0	4.0	4.0	4.57	69.68	PD081317	-
PD081319	PD081319	O=C1CCN(CCSc2ccc([N+](=O)[O-])c3nonc23)CC1	WOUWWOVYUHXLPN-UHFFFAOYSA-N	GSTM2	Homo sapiens									1										1								2.0	322.07	8.0	0.0	5.0	3.0	2.0	1.89	102.37	PD081319	-
PD081321	PD081321	CNC(=O)c1ccc(O[C@H]2CC[C@H](NC(=O)Nc3ccc(OC(F)(F)F)cc3)CC2)cc1	JNPWHXLRBKEIPP-RZDIXWSQSA-N	EPHX2	Homo sapiens									1										1		1						2.0	451.17	4.0	3.0	6.0	3.0	2.0	4.46	88.69	PD081322	-
PD081323	PD081323	CN(C)C(=O)C1CCN(c2ccnc3c2c(/C=C2\Oc4cccc(O)c4C2=O)cn3C)CC1	PGXJHBPGPCVGNZ-MOSHPQCFSA-N	MTOR	Homo sapiens									1										1								2.0	446.2	7.0	1.0	3.0	5.0	3.0	3.2	87.9	PD081324	-
PD081325	PD081325	Cc1cc(-c2nnc3n2CCCCC3)c(C)n1-c1cccc(C(F)(F)F)c1	PPPSKWGJGYDJPC-UHFFFAOYSA-N	HPGD	Homo sapiens									1										1								2.0	374.17	4.0	0.0	2.0	4.0	3.0	5.1	35.64	PD081325	-
PD081327	PD081327	CCC(C(=O)N[C@@H](CC(=O)O)C(=O)CSCc1ccccc1)n1ccnc(NCCn2nc(C)cc2C)c1=O	VIKAKOARTUQKPC-HMTLIYDFSA-N	CASP3	Homo sapiens									1										1								3.0	554.23	10.0	3.0	15.0	3.0	3.0	2.58	148.21	PD081328	-
PD081329	PD081329	O=C1Cc2c([nH]c3ccc(Cl)cc23)-c2ccccc2N1	OKMGGPIYQLLQFZ-UHFFFAOYSA-N	GSK3B	Homo sapiens									1										1								4.0	282.06	1.0	2.0	0.0	4.0	3.0	3.98	44.89	PD081329	-
PD081331	PD081331	CN(C)CCc1ccc(Nc2ncc(Cl)c(-c3ccc4cc[nH]c4c3)n2)cc1	LHOZDNGAEMLEKU-UHFFFAOYSA-N	KDR	Homo sapiens									1										1								2.0	391.16	4.0	2.0	6.0	4.0	4.0	5.13	56.84	PD081331	-
PD081333	PD081333	COC1CCN(C(=O)C2CCN(c3ccnc4c3c(/C=C3\Oc5ccc(NC(=O)Nc6cccnc6)cc5C3=O)cn4C)CC2)C1	QEZWCJGAMDEIKI-MWLSYYOVSA-N	MTOR	Homo sapiens									1										1								2.0	621.27	9.0	2.0	6.0	7.0	4.0	4.69	130.92	PD081334	-
PD081335	PD081335	O=C1C[C@H](NC(=O)[C@@H]2CN(S(=O)(=O)c3ccccc3)C[C@@H]3CCCC[C@H](NC(=O)c4nccc5ccccc45)C(=O)N32)C(O)O1	JSLLIKPZGONZEJ-VLYBMZSBSA-N	CASP1	Homo sapiens									1										1								2.0	635.2	9.0	3.0	6.0	6.0	3.0	0.93	175.31	PD081336	-
PD081337	PD081337	COc1cc2ncnc(Oc3ccc(NC(=O)Nc4ccc(F)cc4F)cc3)c2cc1OC	FMQNPBJPCTVJNH-UHFFFAOYSA-N	KDR	Homo sapiens									1										1								1.0	452.13	6.0	2.0	6.0	4.0	4.0	5.36	94.6	PD081337	-
PD081339	PD081339	Cn1cc(/C=C2\Oc3ccc(NC(=O)Nc4cccnc4)cc3C2=O)c2c(N3CCC(C(=O)N4CCCCC4)CC3)ccnc21	ZEAJNMSPEUCLGQ-MIXAMLLLSA-N	MTOR	Homo sapiens									1										1								2.0	605.28	8.0	2.0	5.0	7.0	4.0	5.46	121.69	PD081340	-
PD081341	PD081341	CS(=O)(=O)Nc1ccc(-c2ccnc(Nc3ccc(CN4CCC(O)CC4)cc3)n2)cc1	MLIKCBALQRTPFL-UHFFFAOYSA-N	JAK2	Homo sapiens									1										1								2.0	453.18	7.0	3.0	7.0	4.0	3.0	3.22	107.45	PD081341	-
PD081343	PD081343	O=C1NCc2[nH]c3c(ccc4cnc(-c5ccccc5F)cc43)c21	ZQUFPLLWPVGSOW-UHFFFAOYSA-N	MAPK9	Homo sapiens									1										1								2.0	317.1	2.0	2.0	1.0	5.0	4.0	3.77	57.78	PD081343	-
PD081345	PD081345	COc1cc2c(Oc3ccc(NC(=O)N/N=C/c4ccc(F)cc4F)cc3F)ccnc2cc1OCCCN1CCC(C)CC1	PSTHAQGLUUIJDB-CHSHITCJSA-N	MET	Homo sapiens									1										1								6.0	621.26	7.0	2.0	11.0	5.0	4.0	7.11	97.31	PD081346	-
PD081347	PD081347	Cn1ccc2ncnc(Oc3ccc(NC(=O)Nc4cccc(C(F)(F)F)c4)c(Cl)c3)c21	OCINIHGZWSHFSH-UHFFFAOYSA-N	KDR	Homo sapiens									1										1		1						1.0	461.09	5.0	2.0	4.0	4.0	4.0	6.08	81.07	PD081347	-
PD081349	PD081349	CCc1cccc(CC)c1NC(=O)c1nn(C)c2c1CCc1cnc(Nc3ccc(C(N)=O)cc3OC)nc1-2	ZWRLLBAFCKACAL-UHFFFAOYSA-N	TTK	Homo sapiens									1										1								4.0	525.25	8.0	3.0	8.0	5.0	4.0	4.2	137.05	PD081349	-
PD081351	PD081351	C=CCO/N=C/c1c(N)ncnc1Oc1ccc2[nH]c(C)cc2c1F	FXBNWAKVMJGXJE-GZIVZEMBSA-N	KDR	Homo sapiens									1										1								2.0	341.13	6.0	2.0	6.0	3.0	3.0	3.32	98.41	PD081352	-
PD081354	PD081354	CN(C)C(=O)c1ccc(-c2cc(C(=O)N[C@H]3CCCNC3)c(NC(N)=O)s2)cc1	QNLRIICTRHHTHA-AWEZNQCLSA-N	CHEK1	Homo sapiens									1										1								2.0	415.17	5.0	4.0	5.0	3.0	2.0	2.09	116.56	PD088632	-
PD081356	PD081356	O=C1c2c(c3c4ccc(O)cc4n([C@@H]4OC[C@@H](O)[C@H]4O)c3c3[nH]c4cc(O)ccc4c23)C(=O)N1NC(CO)CO	KVRDNNFTUULNAQ-GRMVFTJISA-N	TOP1	Homo sapiens									1										1								2.0	548.15	11.0	8.0	5.0	7.0	5.0	0.54	200.74	PD081357	-
PD081358	PD081358	CC(C)n1nnc2c(N3CCOCC3)nc(-c3ccc(NC(=O)Nc4ccc(C(N)=O)cc4)cc3)nc21	ITXYPAQDIOJYSR-UHFFFAOYSA-N	MTOR	Homo sapiens									1										1								3.0	501.22	9.0	3.0	6.0	5.0	4.0	3.05	153.18	PD081358	-
PD081360	PD081360	CC(=O)N[C@@H](Cc1cc(F)cc(F)c1)[C@H](O)CN[C@@]1(c2cccc(C(C)(C)C)c2)CC[C@H](Nc2ccccn2)NC1	BSJBZWVNDMOBNC-OVKDWURHSA-N	BACE1	Homo sapiens									1										1								2.0	565.32	6.0	5.0	10.0	4.0	3.0	4.37	98.31	PD081361	-
PD081362	PD081362	CN[C@@H](C)C(=O)N[C@H]1CCC[C@H]2C[C@H]3CCN(CCc4ccc(C)cc4)C[C@H]3N2C1=O	AQFHGNZPIGAZGV-JELQSWKKSA-N	BIRC2	Homo sapiens									1										1								2.0	426.3	4.0	2.0	6.0	4.0	1.0	2.11	64.68	PD081363	-
PD081364	PD081364	COCCN(C)C/C=C/C(=O)Nc1ccc2ncnc(Nc3cccc(Br)c3)c2c1	BDNLTOXSGSRVFC-QPJJXVBHSA-N	EGFR	Homo sapiens									1										1				1				2.0	469.11	6.0	2.0	9.0	3.0	3.0	4.21	79.38	PD081365	-
PD081366	PD081366	CC(=O)N1CCN(c2nncc3cc(-c4c(C)ccc5c(NC6CC6)noc45)ccc23)[C@@H](C)C1	WMURFNLBNNBFQO-INIZCTEOSA-N	MAPK14	Homo sapiens									1										1								2.0	456.23	7.0	1.0	4.0	6.0	4.0	4.38	87.39	PD088638	-
PD081368	PD081368	Cc1cc(Nc2nn(Cc3cc(F)ccc3F)c(=O)c3ccccc23)n[nH]1	SVTBFGDAWVMFBQ-UHFFFAOYSA-N	AURKA	Homo sapiens									1										1								2.0	367.12	5.0	2.0	4.0	4.0	4.0	3.5	75.6	PD081368	-
PD081370	PD081370	Cc1ncc(-c2ccnc(Nc3ccc(C(=O)NC4CCN(C)CC4)c(F)c3)n2)n1C(C)C	AEZMHSFAAKOLNC-UHFFFAOYSA-N	CDK2	Homo sapiens									1										1								2.0	451.25	7.0	2.0	6.0	4.0	3.0	3.94	87.97	PD081370	-
PD081372	PD081372	CC(C)(CC(O)(Cn1ccc(=O)c2ccccc21)C(F)(F)F)c1cc(F)ccc1O	DOSZIFWFKFJGQL-UHFFFAOYSA-N	NR3C1	Homo sapiens									1										1								3.0	423.15	4.0	2.0	5.0	3.0	3.0	4.51	62.46	PD081372	-
PD081374	PD081374	COc1ccc2[nH]c(-c3c(C)nn(C)c3C)c(/C=C3/Oc4ccc(NC(=O)Nc5ccc(C(=O)N6CCN(C)CC6)cc5)cc4C3=O)c2c1	CCUOOSWBLWZDMN-UZWMFBFFSA-N	PIK3CA	Homo sapiens									1										1								2.0	659.29	8.0	3.0	6.0	7.0	5.0	5.84	133.82	PD081375	-
PD081376	PD081376	Oc1cccc([C@H]2Sc3cc(O)ccc3O[C@H]2c2ccc(OCCN3CCCCC3)cc2)c1	NAULYXADLNIEES-RRPNLBNLSA-N	ESR1	Homo sapiens									1										1		1						2.0	463.18	6.0	2.0	6.0	5.0	3.0	5.93	62.16	PD081377	-
PD081378	PD081378	Cc1ccc(Sc2cnc(Nc3cccc(Br)n3)s2)cc1C(=O)N1CCN(C(=O)CN)CC1	KVPNOQAXVUMKFJ-UHFFFAOYSA-N	NTRK1	Homo sapiens									1										1		1						3.0	546.05	8.0	2.0	6.0	4.0	3.0	3.75	104.45	PD081378	-
PD081380	PD081380	CC1(C)c2cc(N3CCC(N4CCOCC4)CC3)ccc2C(=O)c2c1[nH]c1cc(C#N)ccc21	OVRQGEYZDUHJNZ-UHFFFAOYSA-N	ALK	Homo sapiens									1										1								3.0	454.24	5.0	1.0	2.0	6.0	3.0	4.21	72.36	PD081380	-
PD081382	PD081382	COC(=O)[C@H](CO)NC(=O)CC/C(C)=C/Cc1c(O)c2c(c(C)c1OC)COC2=O	GAMZMTPMBWXMIQ-RILDOFPPSA-N	IMPDH2	Homo sapiens									1										1								3.0	421.17	8.0	3.0	9.0	2.0	1.0	1.3	131.39	PD081383	-
PD081384	PD081384	NC(=O)Nc1sc(-c2ccc(C(=O)N3CCCCC3)cc2)cc1C(=O)N[C@H]1CCCNC1	OJCFXBBBONFKSW-KRWDZBQOSA-N	CHEK1	Homo sapiens									1										1								2.0	455.2	5.0	4.0	5.0	4.0	2.0	3.01	116.56	PD088647	-
PD081386	PD081386	O=C(O)CCCCCCC(=O)Nc1ccc(C2=C(c3ccc(O)cc3)C3CC(S(=O)(=O)Oc4cccc(O)c4)C2O3)cc1	HNLHZLHXGMYVNW-UHFFFAOYSA-N	HDAC6	Homo sapiens									1										1								3.0	607.19	8.0	4.0	13.0	5.0	3.0	5.32	159.46	PD081386	-
PD081388	PD081388	O=C(/C=C/c1ccc(O)cc1)/C=C/c1ccc(O)cc1	FTEGUKWEUQPKIS-YDWXAUTNSA-N	F3	Homo sapiens									1										1		1						6.0	266.09	3.0	2.0	4.0	2.0	2.0	3.39	57.53	PD081389	-
PD081390	PD081390	Cn1c(=O)c(-c2c(Cl)cccc2Cl)cc2cnc(Nc3ccc(I)cc3)nc21	OKPRPWYLQUKXFE-UHFFFAOYSA-N	ABL1,BCR;ABL1	Homo sapiens									1										1								5.0	521.95	5.0	1.0	3.0	4.0	4.0	5.65	59.81	PD081390	-
PD081392	PD081392	Cc1n[nH]c2cnc(-c3cncc(OC[C@@H](N)Cc4c[nH]c5ccccc45)c3)cc12	BNFMNOMUDQORMA-KRWDZBQOSA-N	AKT1	Homo sapiens									1										1								2.0	398.19	5.0	3.0	6.0	5.0	5.0	3.76	105.5	PD088648	-
PD081396	PD081396	CNc1nc2oc(-c3ccccc3)nc2c2c1ncn2C	SOFBJAGASYHSSD-UHFFFAOYSA-N	IKBKB	Homo sapiens									1										1								6.0	279.11	6.0	1.0	2.0	4.0	4.0	2.82	68.77	PD081396	-
PD081399	PD081399	O=C(NCc1ccc(S(=O)(=O)c2cc(F)cc(F)c2)cn1)c1cc2ccncc2o1	GUOKRDAMSCOAIA-UHFFFAOYSA-N	NAMPT	Homo sapiens									1										1		1						2.0	429.06	6.0	1.0	5.0	4.0	4.0	3.26	102.16	PD081399	-
PD081401	PD081401	COc1ccc(C(=O)NC(=O)Nc2ccc3c(c2)NC(=O)/C3=C\c2[nH]c(C)c(C(=O)O)c2C)cc1	MUEJCYLSAWKRDN-WQRHYEAKSA-N	AURKB	Homo sapiens									1										1								2.0	474.15	5.0	5.0	5.0	4.0	3.0	3.79	149.62	PD081402	-
PD081403	PD081403	CCNC(=O)Nc1ccc(-c2nc(C3=CCOCC3)c3sccc3n2)cc1	IPWXWKUTJBMKOZ-UHFFFAOYSA-N	MTOR	Homo sapiens									1										1		1						2.0	380.13	5.0	2.0	4.0	4.0	3.0	4.3	76.14	PD081403	-
PD081405	PD081405	CC(C)C[C@@H](C(=O)NCC#N)c1cccc(-c2cccc(-c3csc(CN4CCNCC4)n3)c2)c1	GGQXMEFMGFPZJK-RUZDIDTESA-N	CTSK	Homo sapiens									1										1								4.0	487.24	6.0	2.0	9.0	4.0	3.0	4.65	81.05	PD081406	-
PD081407	PD081407	CCn1ncc(-c2ccnc3[nH]ccc23)c1-c1ccc(NC(=O)Nc2ccccc2)cc1	JIJDOMRYZXJLMB-UHFFFAOYSA-N	AURKB	Homo sapiens									1										1								2.0	422.19	4.0	3.0	5.0	5.0	5.0	5.76	87.63	PD081407	-
PD081409	JAK3 inhibitor VI	O=C1Nc2ccc(-c3cccnc3)cc2/C1=C/c1ccc[nH]1	IQNTXIMXKCURDC-YBEGLDIGSA-N	JAK3	Homo sapiens									1										1								3.0	287.11	2.0	2.0	2.0	4.0	3.0	3.57	57.78	PD026409	-
PD081412	PD081412	Cc1[nH]c2ccccc2c1CCN1CCc2cc(/C=C/C(=O)NO)ccc2C1	OCUGVNIZKXOPTO-VQHVLOKHSA-N	HDAC1	Homo sapiens									1										1		1						2.0	375.19	3.0	3.0	5.0	4.0	3.0	3.6	68.36	PD081413	-
PD081414	PD081414	O=C(Nc1ccc(-c2nc(N3CC4CCC(C3)O4)c3cnn(C4CCC5(CC4)OCCO5)c3n2)cc1)NC1CC1	PPTXHISAVZQIPE-UHFFFAOYSA-N	MTOR	Homo sapiens									1										1								2.0	545.28	9.0	2.0	5.0	8.0	3.0	4.0	115.66	PD081414	-
PD081416	PD081416	COc1cc2c(Oc3ccc(N/C=C4\C(=O)NC(=O)N(c5ccc(C)cc5)C4=O)cc3F)ccnc2cc1OCCCN1CCCC1	ZKQIRZBNHQBAND-YYADALCUSA-N	MET	Homo sapiens									1										1								5.0	639.25	9.0	2.0	11.0	6.0	4.0	5.93	122.33	PD081417	-
PD081418	PD081418	N[C@H](COc1cncc(-c2cc3c(-c4ccco4)n[nH]c3cn2)c1)Cc1ccccc1	SUTSEXNYUMIAMX-SFHVURJKSA-N	AKT1	Homo sapiens									1										1								2.0	411.17	6.0	2.0	7.0	5.0	5.0	4.23	102.85	PD088652	-
PD081420	PD081420	CCS(=O)(=O)c1cccc(Oc2cccc(-n3c(C)nc4c(C(F)(F)F)cccc43)c2)c1	PZJQTRGWISHVPT-UHFFFAOYSA-N	NR1H3	Homo sapiens									1										1								2.0	460.11	5.0	0.0	5.0	4.0	4.0	5.94	61.19	PD081420	-
PD081422	PD081422	COC(=O)Nc1ccc(-c2nc(N3CCOCC3)c3cnn(C4CCN(Cc5ccccc5)CC4)c3n2)cc1	BYTUZXFPQGUPIA-UHFFFAOYSA-N	MTOR	Homo sapiens									1										1		1						2.0	527.26	9.0	1.0	6.0	6.0	4.0	4.35	97.64	PD081422	-
PD081424	PD081424	Cc1cc(COC(=O)NCc2ccc(-c3cc(NC(=O)c4ccc(OCCN5CCCC5)cc4)[nH]n3)cc2)no1	JCKZGURUGPXEEO-UHFFFAOYSA-N	FLT3	Homo sapiens									1										1								3.0	544.24	8.0	3.0	11.0	5.0	4.0	4.53	134.61	PD081424	-
PD081426	PD081426	C[C@@H](COc1ccc([C@@H]2Oc3ccc(O)cc3S[C@@H]2c2ccc(O)cc2)cc1)N1CC[C@@H](C)C1	HQIHZXMANDEWIH-GSGOWXKQSA-N	ESR1	Homo sapiens									1										1								2.0	477.2	6.0	2.0	6.0	5.0	3.0	6.17	62.16	PD081427	-
PD081428	PD081428	CCOC(=O)C(=O)N(Cc1cc(F)cc(F)c1)c1ccc2c(c1)OC(C)(COc1ccc(C(=N)N)cc1)CN2C	XWODTYJWLAAROK-UHFFFAOYSA-N	F2	Homo sapiens									1										1								2.0	552.22	7.0	2.0	8.0	4.0	3.0	4.01	118.18	PD081428	-
PD081430	PD081430	CC(C)(C)OC(=O)N[C@@H](Cc1ccccc1)C(=O)N1CC2(C[C@H]1C(=O)NCCCCCC(=O)NO)SCCS2	ZGOTXZRPCUPVJX-SFTDATJTSA-N	HDAC8	Homo sapiens									1										1								2.0	580.24	8.0	4.0	11.0	3.0	1.0	3.08	137.07	PD081431	-
PD081432	PD081432	Cn1cncc1C(OCc1ccc(C#N)cc1C#CCCCCO)c1ccc(C#N)cc1	FARRVZOQABGAGC-UHFFFAOYSA-N	FNTB	Homo sapiens									1										1								2.0	424.19	6.0	1.0	8.0	3.0	3.0	3.98	94.86	PD081432	-
PD081434	PD081434	O=C1NC(=O)/C(=C/c2ccc(-c3cc(F)ccc3O)o2)S1	IQDLOUNBMCMZPG-SDQBBNPISA-N	PIK3CG	Homo sapiens									1										1								2.0	305.02	5.0	2.0	2.0	3.0	2.0	3.12	79.54	PD081435	-
PD081436	PD081436	O=CN1CCC(Oc2ccc(-c3n[nH]c4ccc(C(=O)NC(c5ccccn5)C5CC5)cc34)cc2)CC1	GXKIHPXGVQZMIN-UHFFFAOYSA-N	TTK	Homo sapiens									1										1								3.0	495.23	5.0	2.0	8.0	6.0	4.0	4.51	100.21	PD081436	-
PD081438	PD081438	Cc1cc(N2CCCS2(=O)=O)c2oc(-c3ccc(O)c(C(F)(F)F)c3)c(O)c(=O)c2c1	JMPLGCVMPMVPMF-UHFFFAOYSA-N	CDK1	Homo sapiens									1										1								2.0	455.07	6.0	2.0	2.0	4.0	3.0	3.74	108.05	PD081438	-
PD081440	PD081440	CC(C)(C)S(=O)(=O)C[C@H](C1CC1)N1C(=O)[C@@](C)(CC(N)=O)C[C@H](c2cccc(Cl)c2)[C@H]1c1ccc(Cl)cc1	MANSWCXFKVIKPE-HIJQLYNKSA-N	MDM2	Homo sapiens									1										1								2.0	578.18	4.0	1.0	8.0	4.0	2.0	5.92	97.54	PD081441	-
PD081442	PD081442	Cc1oc(-c2cccc(F)c2)nc1CCOc1ccc2c(c1)CC[C@H]2CC(=O)O	FRGLCFAIHKWDMD-INIZCTEOSA-N	PPARG	Homo sapiens									1										1								2.0	395.15	4.0	1.0	7.0	4.0	3.0	4.92	72.56	PD081443	-
PD081444	PD081444	Oc1ccc([C@H]2Sc3cc(O)ccc3O[C@H]2c2ccc(OCCN3C4CCCC3CCC4)cc2)cc1	XKPFIOPKBVZILS-HAIKDGOVSA-N	ESR1	Homo sapiens									1										1								2.0	503.21	6.0	2.0	6.0	6.0	3.0	6.85	62.16	PD081445	-
PD081446	PD081446	CCC[C@@H]([C@@H](Cc1ccc(C)s1)C(=O)N[C@@H](CCC/N=C(/N)NS(=O)(=O)c1ccccn1)C(=O)Nc1nccs1)N(O)C=O	VUYBRUBUOZYSQS-FSSWDIPSSA-N	ADAM17	Homo sapiens									1										1								3.0	664.19	11.0	5.0	17.0	3.0	3.0	2.28	209.07	PD081447	-
PD081448	PD081448	Cc1nc(Nc2cc(-c3ccc(CNC(=O)OCc4cc(C)on4)cc3)n[nH]2)cc(N2CCN(CCO)CC2)n1	YALRSSKMFGDNEE-UHFFFAOYSA-N	FLT3	Homo sapiens									1										1								1.0	547.27	11.0	4.0	10.0	5.0	4.0	2.76	157.56	PD081448	-
PD081450	PD081450	O=C(Nc1ccc(Oc2ncnc3[nH]ncc23)cc1)Nc1ccc(Cl)c(C(F)(F)F)c1	NZCHGHMPHKCWLR-UHFFFAOYSA-N	FLT3	Homo sapiens									1										1		1						7.0	448.07	5.0	3.0	4.0	4.0	4.0	5.46	104.82	PD081450	-
PD081452	PD081452	O=C1C[C@H](NC(=O)[C@@H]2CNC[C@@H]3CCCC[C@H](NC(=O)c4ccc5ccccc5c4)C(=O)N32)C(O)O1	YPSFOQSJNMXHOO-OTUOPVNPSA-N	CASP1	Homo sapiens									1										1								2.0	494.22	7.0	4.0	4.0	5.0	2.0	0.43	137.07	PD081453	-
PD081454	PD081454	O=C(Nc1ccncc1)Nc1ccc(-c2nc(N3CCOCC3)nc(N3[C@@H]4COC[C@H]3[C@@H](O)C4)n2)cc1	KXIQRMIPXPVUID-ACRUOGEOSA-N	PIK3CA	Homo sapiens									1										1								0.0	504.22	10.0	3.0	5.0	6.0	3.0	1.75	137.86	PD081455	1
PD082205	PD082205	O=C(Nc1ccncc1)Nc1ccc(-c2nc(N3CCOCC3)nc(N3[C@H]4COC[C@@H]3[C@H](O)C4)n2)cc1	KXIQRMIPXPVUID-NJDAHSKKSA-N	PIK3CA	Homo sapiens									1										1								0.0	504.22	10.0	3.0	5.0	6.0	3.0	1.75	137.86	PD081455	1
PD081456	PD081456	CCNC(=O)c1sc2ncnc(Nc3ccc(F)cc3OC(C)C)c2c1C	QVHDOESZFDSEKS-UHFFFAOYSA-N	MKNK2	Homo sapiens									1										1								2.0	388.14	6.0	2.0	6.0	3.0	3.0	4.42	76.14	PD081456	-
PD081458	PD081458	O=C(NCc1cccnc1)Nc1ccc(S(=O)(=O)N[C@H]2CC[C@H](O)CC2)cc1	HVMDAVIRPVJPLJ-QAQDUYKDSA-N	NAMPT	Homo sapiens									1										1								1.0	404.15	5.0	4.0	6.0	3.0	2.0	1.99	120.42	PD081459	-
PD081460	PD081460	COCCS(=O)(=O)c1ccc(Nc2nccc(-c3cnc(C)n3C(C)C)n2)cc1	WBPFBRSQEAARNO-UHFFFAOYSA-N	CDK2	Homo sapiens									1										1								2.0	415.17	8.0	1.0	8.0	3.0	3.0	3.39	99.0	PD081460	-
PD081462	PD081462	O=C(NC(c1ccccc1)C1CC1)c1ccc2[nH]nc(-c3ccc(N4CCOCC4)cc3)c2c1	VTYQURZUYOUAOK-UHFFFAOYSA-N	TTK	Homo sapiens									1										1								2.0	452.22	4.0	2.0	6.0	6.0	4.0	4.95	70.25	PD081462	-
PD081464	PD081464	CNC(=O)Nc1ccc(-c2nc(N3CC4CCC(C3)O4)c3cnn(C4CCN(C(=O)OC(C)(C)C)CC4)c3n2)cc1	CEPZLSYRIXXARR-UHFFFAOYSA-N	MTOR	Homo sapiens									1										1								2.0	562.3	9.0	2.0	4.0	6.0	3.0	4.18	126.74	PD081464	-
PD081466	PD081466	CC(C)(C)[C@H](NC[C@@H](N)CS)C(=O)N1Cc2ccccc2C[C@H]1C(=O)N[C@H](CCS(C)(=O)=O)C(=O)O	SHPJZFRGYYTFJF-YSTOQKLRSA-N	FNTB	Homo sapiens									1										1								3.0	542.22	8.0	5.0	11.0	2.0	1.0	0.21	158.9	PD081467	-
PD081468	PD081468	COc1ccc2ncc(-c3cccc(NC4CCNCC4)n3)n2c1	QTFQLQSPZXWTOC-UHFFFAOYSA-N	IRAK4	Homo sapiens									1										1								1.0	323.17	6.0	2.0	4.0	4.0	3.0	2.57	63.48	PD081468	-
PD081470	PD081470	O=C1CCN2c3nc(Nc4ccc(N5CCOCC5)cc4)ncc3C=C(c3c(Cl)cccc3Cl)N12	GZZUDLULILLTCZ-UHFFFAOYSA-N	LCK	Homo sapiens									1										1								3.0	508.12	7.0	1.0	4.0	6.0	3.0	4.83	73.83	PD081470	-
PD081472	PD081472	CC(C)(C)OC(=O)N1CCC(n2ncc3c(N4CCOCC4)nc(-c4ccc(NC(=O)NCCF)cc4)nc32)CC1	SIZCWNYHKIDIFT-UHFFFAOYSA-N	MTOR	Homo sapiens									1										1		1						3.0	568.29	9.0	2.0	6.0	5.0	3.0	3.99	126.74	PD081472	-
PD081474	PD081474	CN(Cc1nc2c(N3CCOCC3)nc(-c3cncnc3)nc2n1C)c1ncc(C(=O)NO)cn1	YDADZTFICPFSQK-UHFFFAOYSA-N	HDAC1	Homo sapiens									1										1		1						2.0	477.2	13.0	2.0	6.0	5.0	4.0	0.2	160.2	PD081474	-
PD081476	PD081476	COc1cc2ncnc(Oc3ccc4c(C(N)=O)cccc4c3)c2cc1OC	ZYYNXHSAMWEIKK-UHFFFAOYSA-N	KDR	Homo sapiens									1										1								5.0	375.12	6.0	1.0	5.0	4.0	4.0	3.69	96.56	PD081476	-
PD081478	PD081478	O=C1c2c(c3c4ccc(O)cc4n([C@H]4O[C@H](CO)[C@@H](O)[C@H]4O)c3c3[nH]c4cc(O)ccc4c23)C(=O)N1NC(CO)CO	SSNDZWKPSSKDHE-JMIMCTBCSA-N	TOP1	Homo sapiens									1										1								2.0	578.16	12.0	9.0	6.0	7.0	5.0	-0.09	220.97	PD081479	1
PD081766	PD081766	O=C1c2c(c3c4ccc(O)cc4n([C@@H]4O[C@H](CO)[C@H](O)[C@H]4O)c3c3[nH]c4cc(O)ccc4c23)C(=O)N1NC(CO)CO	SSNDZWKPSSKDHE-PKMVOSEESA-N	TOP1	Homo sapiens									1										1								1.0	578.16	12.0	9.0	6.0	7.0	5.0	-0.09	220.97	PD081479	1
PD083025	PD083025	O=C1c2c(c3c4ccc(O)cc4n([C@H]4O[C@H](CO)[C@H](O)[C@H]4O)c3c3[nH]c4cc(O)ccc4c23)C(=O)N1NC(CO)CO	SSNDZWKPSSKDHE-AMHSWEGSSA-N	TOP1	Homo sapiens									1										1								1.0	578.16	12.0	9.0	6.0	7.0	5.0	-0.09	220.97	PD081479	1
PD083027	PD083027	O=C1c2c(c3c4ccc(O)cc4n([C@@H]4O[C@H](CO)[C@@H](O)[C@H]4O)c3c3[nH]c4cc(O)ccc4c23)C(=O)N1NC(CO)CO	SSNDZWKPSSKDHE-TUGUJXJRSA-N	TOP1	Homo sapiens									1										1								2.0	578.16	12.0	9.0	6.0	7.0	5.0	-0.09	220.97	PD081479	1
PD084436	PD084436	O=C1c2c(c3c4ccc(O)cc4n([C@@H]4O[C@H](CO)[C@@H](O)[C@@H]4O)c3c3[nH]c4cc(O)ccc4c23)C(=O)N1NC(CO)CO	SSNDZWKPSSKDHE-KVPHNHENSA-N	TOP1	Homo sapiens									1										1								1.0	578.16	12.0	9.0	6.0	7.0	5.0	-0.09	220.97	PD081479	1
PD081480	PD081480	COc1cc2c(Nc3cc(CC(=O)Nc4cccc(F)c4)[nH]n3)ncnc2cc1OCCCN1CCC[C@@H]1CO	SQYOZDZCDXQDRZ-OAQYLSRUSA-N	AURKB	Homo sapiens									1										1								2.0	549.25	9.0	4.0	12.0	5.0	4.0	3.65	137.52	PD081481	-
PD081482	PD081482	O=C(Nc1ccc(CO)cc1)Nc1ccc(-c2nc(N3CCOCC3)nc(N3C4CCC3COC4)n2)cc1	OSEKXTTWKHKJPC-UHFFFAOYSA-N	MTOR	Homo sapiens									1										1								3.0	517.24	9.0	3.0	6.0	6.0	3.0	2.88	124.97	PD081482	-
PD081484	PD081484	CC(=O)O[C@H]1C(=O)[C@]2(C)[C@@H](O)C[C@H]3OC[C@@]3(OC(C)=O)[C@H]2[C@H](OC(=O)c2ccccc2)[C@]2(O)C[C@H](OC(=O)[C@H](OC(=O)CCC(=O)NCc3ccc(CN4C(=O)[C@@H]5CC(=O)N[C@@H](CCCNC(=N)N)C(=O)NCC(=O)N[C@@H](CC(=O)O)C(=O)NC[C@@H]4C(=O)N5)cc3)[C@@H](NC(=O)c3ccccc3)c3ccccc3)C(C)=C1C2(C)C	RNDRXNFFHJEMIZ-LTYRGGSKSA-N	ITGB3	Homo sapiens									1										1								2.0	1565.62	24.0	13.0	24.0	11.0	4.0	-0.08	521.47	PD081485	1
[truncated: 2,586 more rows]

## Sheet: PROBES TARGETS
pdid	compound_name	smiles	inchikey	action	covalent	biased_id	target	gene_name	organism	target_type	target_family	potency_flag	cell_potency_flag	selectivity_flag	orthogonal_probe_flag	max_cell_potency_flag	control_flag	alert_flag	obsolete_flag	P&D probe-likeness score	Probe Miner Score	Cells score (Chemical Probes.org)	Organisms score (Chemical Probes.org)
[truncated: 4,884 more rows]

[truncated: 9 more sheets: TARGETS, TARGET FAMILIES, ORGANISMS, COMPOUNDSETS, COMPOUNDSET INTERSECTIONS, SCORES INTERSECTIONS, HQCP INTERSECTIONS, APPROVED DRUGS (ChEMBL), URLs]
